# Supplementary material for: Exploring open cheminformatics approaches for categorizing per- and polyfluoroalkyl substances (PFASs)
Source: Royal Society of Chemistry journal article supplement (doi:10.1039/c9em00321e), 2019-01-01
Supplement: c9em00321e1.xlsx [file c9em00321e1.xlsx]

## Sheet: Overview
	Code	Explaination	SUM	Perfluoroalkanoyl	Perfluorosulfonyl	n:1/n:2 fluorotelomer
	1	the perfluoroalkyl chain was branched or cyclic	10	3	1	6
	2	the perfluoroalkyl chain was unsaturated	7	0	0	7
	3	the fluoroalkyl chain was not perfluorinated	23	13	1	9
	4	the R group was a single F atom	15	7	8	0
	5	the dividing groups (X) were outside the SMARTS notation used in splitPFAS	66	0	0	66
	5.1	incorrectly split - more than one R group	22	15	0	7
	5.2	incorrectly split - more than one PFAS part	2	1	1	0
	5.3	Split correctly with two or more R groups and PFAS-parts	73	2	12	59
	6	a combination of the factors above	4	0	4	0
		Sum	222	41	27	154
		Unsuccessfully split entries	149	39	15	95
			SUM	Perfluoroalkanoyl	Perfluorosulfonyl	n:2 fluorotelomer	n:1 fluorotelomer
		Total entries	770
		Successfully split by splitPFAS	621	52	168	246	155
		Input for the scenarios	548	50	156	200	142

## Sheet: Mislabeled
							Category in the OECD list											Split result										Scenario i)													Scenario ii)
	CAS_Number	Chemical_Name	Synonyms	Molecular_Formula	SMILES	Previously_used_CAS_Number	Structure_Category	Structure_Category_Name	Number_of_Functional_Groups	Perfluoroalkyl_Chain_Length	Linear_or_Branched_Isomer	X.Potential._precursor_to_PFAAs_in_the_environment.biota	Polymer	Mixture	Related_Chemicals	Uncertainty_in_Structure_Categorisation	Note	SMILES_in	R_group	CnF2n+1-X	N_PFAS_Groups_Out	SplitSMARTS (X)	SplitPFAS_errorMsg	Error_code	sub_code1	sub_code2	CAS_Number	SMILES	new_InChIKey	kingdom_name	superclass_name	class_name	subclass_name	direct_parent_name	description	molecular_framework	ClassyFireSource	MSG	query_id	CAS_Number	no_F_SMILES	new_InChIKey	kingdom_name	superclass_name	class_name	subclass_name	direct_parent_name	description	molecular_framework
759	17165-55-8	Butanoic acid, 2,2,3,3,4,4,4-heptafluoro-, 2-propen-1-yl ester	Butanoic acid, heptafluoro-, 2-propenyl ester (9CI); Butyric acid, heptafluoro-, allyl ester (8CI); Allyl perfluorobutyrate	C7 H5 F7 O2	FC(F)(F)C(F)(F)C(F)(F)CC(=O)OC=C		102	perfluoroalkyl carboxylic acids (PFCAs), their salts and esters	1	3	1	1	0	0	NA	0		FC(F)(F)C(F)(F)C(F)(F)CC(=O)OC=C	C(=O)OC=C	FC(F)(F)C(F)(F)C(F)(F)C	1	[CH2]					17165-55-8	FC(F)(F)C(F)(F)C(F)(F)CC(=O)OC=C	JPAQRQFVIPWHNE-UHFFFAOYSA-N	Organic compounds	Lipids and lipid-like molecules	Fatty Acyls	Fatty acid esters	Fatty acid esters	This compound belongs to the class of organic compounds known as fatty acid esters. These are carboxylic ester derivatives of a fatty acid.	Aliphatic acyclic compounds	SMILES			17165-55-8	CCCCC(=O)OC=C	BLZSRIYYOIZLJL-UHFFFAOYSA-N	Organic compounds	Lipids and lipid-like molecules	Fatty Acyls	Fatty acid esters	Fatty acid esters	This compound belongs to the class of organic compounds known as fatty acid esters. These are carboxylic ester derivatives of a fatty acid.	Aliphatic acyclic compounds
3249	72828-80-9	Pentanoic acid, 2,2,3,3,4,4,5,5-octafluoro-, octyl ester		C13 H18 F8 O2	CCCCC(=O)OCC(F)(F)C(F)(F)C(F)(F)C(F)(F)CCC		108	1-H perfluoroalkyl carboxylic acids	0	3	1	1	0	0	NA	0	1-H	CCCCC(=O)OCC(F)(F)C(F)(F)C(F)(F)C(F)(F)CCC	C	CCCCC(=O)OCC(F)(F)C(F)(F)C(F)(F)C(F)(F)CC	1	[CH2][CH2]		5.1			72828-80-9	CCCCC(=O)OCC(F)(F)C(F)(F)C(F)(F)C(F)(F)CCC	PQKROKRLQONMBH-UHFFFAOYSA-N	Organic compounds	Lipids and lipid-like molecules	Fatty Acyls	Fatty acid esters	Fatty acid esters	This compound belongs to the class of organic compounds known as fatty acid esters. These are carboxylic ester derivatives of a fatty acid.	Aliphatic acyclic compounds	SMILES			72828-80-9	CCCCC(=O)OCCCCCCCC	OUYCCOBIJYUMAK-UHFFFAOYSA-N	Organic compounds	Lipids and lipid-like molecules	Fatty Acyls	Fatty alcohol esters	Fatty alcohol esters	This compound belongs to the class of organic compounds known as fatty alcohol esters. These are ester derivatives of a fatty alcohol.	Aliphatic acyclic compounds
3784	51619-73-9	1-Octanesulfonamide, 3,3,4,4,5,5,6,6,7,7,8,8,8-tridecafluoro-N-(2-hydroxyethyl)-N-methyl-	3,3,4,4,5,5,6,6,7,7,8,8,8-Tridecafluoro-N-(2-hydroxyethyl)-N-methyl-1-octanesulfonamide; Forafac 1051	C11 H12 F13 N O3 S	CN(CCO)S(=O)(=O)CCC(F)(F)C(F)(F)C(F)(F)C(F)(F)C(F)(F)C(F)(F)F		203.01	perfluoroalkane sulfonyl amides/amido ethanols (xFASA/Es) and other alcohols	1	6	1	1	0	0	NA	0		CN(CCO)S(=O)(=O)CCC(F)(F)C(F)(F)C(F)(F)C(F)(F)C(F)(F)C(F)(F)F	CN(CCO)S(=O)=O	CCC(F)(F)C(F)(F)C(F)(F)C(F)(F)C(F)(F)C(F)(F)F	1	[CH2][CH2]					51619-73-9	CN(CCO)S(=O)(=O)CCC(F)(F)C(F)(F)C(F)(F)C(F)(F)C(F)(F)C(F)(F)F	PYEYQMPFVPJZMR-UHFFFAOYSA-N	Organic compounds	Organic acids and derivatives	Organic sulfonic acids and derivatives	Organosulfonic acids and derivatives	Organosulfonamides	This compound belongs to the class of organic compounds known as organosulfonamides. These are compounds containing the sulfonamide functional group, an amide of sulfonic acid with the general structure R1S(=O)2N(R2)R3 (R1=alkyl, aryl; R2,R3=H, alkyl, aryl).	Aliphatic acyclic compounds	SMILES			51619-73-9	CN(CCO)S(=O)(=O)CCCCCCCC	PXTVXVZRPQNKOC-UHFFFAOYSA-N	Organic compounds	Organic acids and derivatives	Organic sulfonic acids and derivatives	Organosulfonic acids and derivatives	Organosulfonamides	This compound belongs to the class of organic compounds known as organosulfonamides. These are compounds containing the sulfonamide functional group, an amide of sulfonic acid with the general structure R1S(=O)2N(R2)R3 (R1=alkyl, aryl; R2,R3=H, alkyl, aryl).	Aliphatic acyclic compounds
3804	58253-65-9	Benzoic acid, 4-[(heptadecafluorononen-1-yl)oxy]-	Benzoic acid, 4-[(heptadecafluorononenyl)oxy]- (9CI); 4-[(Heptadecafluorononen-1-yl)oxy]benzoic acid	C16 H5 F17 O3	OC(=O)C1=CC=C(OC(F)=C(F)C(F)(F)C(F)(F)C(F)(F)C(F)(F)C(F)(F)C(F)(F)C(F)(F)F)C=C1		404	n:1 fluorotelomer-based non-polymers	1	8	1	1	0	0	58253-64-8	0		OC(=O)C1=CC=C(OC(F)=C(F)C(F)(F)C(F)(F)C(F)(F)C(F)(F)C(F)(F)C(F)(F)C(F)(F)F)C=C1	NA	NA	NA	NA	No splittable bond found for the input molecule OC(=O)C1=CC=C(OC(F)=C(F)C(F)(F)C(F)(F)C(F)(F)C(F)(F)C(F)(F)C(F)(F)C(F)(F)F)C=C1	2			58253-65-9	OC(=O)C1=CC=C(OC(F)=C(F)C(F)(F)C(F)(F)C(F)(F)C(F)(F)C(F)(F)C(F)(F)C(F)(F)F)C=C1	RTJMWSSYXGAREM-UHFFFAOYSA-N	Organic compounds	Benzenoids	Benzene and substituted derivatives	Benzoic acids and derivatives	Benzoic acids	This compound belongs to the class of organic compounds known as benzoic acids. These are organic Compounds containing a benzene ring which bears at least one carboxyl group.	Aromatic homomonocyclic compounds	SMILES			58253-65-9	OC(=O)C1=CC=C(OC=CCCCCCCC)C=C1	VMGCZMNWKGNUHS-UHFFFAOYSA-N	Organic compounds	Benzenoids	Benzene and substituted derivatives	Benzoic acids and derivatives	Benzoic acids	This compound belongs to the class of organic compounds known as benzoic acids. These are organic Compounds containing a benzene ring which bears at least one carboxyl group.	Aromatic homomonocyclic compounds
3807	59493-70-8	1-Propanaminium, 3-[[[4-[(heptadecafluorononen-1-yl)oxy]phenyl]sulfonyl]amino]-N,N,N-trimethyl-, iodide (1:1)	1-Propanaminium, 3-[[[4-[(heptadecafluorononenyl)oxy]phenyl]sulfonyl]amino]-N,N,N-trimethyl-, iodide (9CI)	C21 H20 F17 N2 O3 S . I	[I-].C[N+](C)(C)CCCNS(=O)(=O)C1=CC=C(OC(F)=C(F)C(F)(F)C(F)(F)C(F)(F)C(F)(F)C(F)(F)C(F)(F)C(F)(F)F)C=C1		404	n:1 fluorotelomer-based non-polymers	1	8	1	1	0	0	59493-69-5	0		[I-].C[N+](C)(C)CCCNS(=O)(=O)C1=CC=C(OC(F)=C(F)C(F)(F)C(F)(F)C(F)(F)C(F)(F)C(F)(F)C(F)(F)C(F)(F)F)C=C1	NA	NA	NA	NA	No splittable bond found for the input molecule [I-].C[N+](C)(C)CCCNS(=O)(=O)C1=CC=C(OC(F)=C(F)C(F)(F)C(F)(F)C(F)(F)C(F)(F)C(F)(F)C(F)(F)C(F)(F)F)C=C1	2			59493-70-8	[I-].C[N+](C)(C)CCCNS(=O)(=O)C1=CC=C(OC(F)=C(F)C(F)(F)C(F)(F)C(F)(F)C(F)(F)C(F)(F)C(F)(F)C(F)(F)F)C=C1	QTARAUXTILIVID-UHFFFAOYSA-M	Organic compounds	Benzenoids	Benzene and substituted derivatives	Benzenesulfonamides	Benzenesulfonamides	This compound belongs to the class of organic compounds known as benzenesulfonamides. These are organic compounds containing a sulfonamide group that is S-linked to a benzene ring.	Aromatic homomonocyclic compounds	SMILES			59493-70-8	[I-].C[N+](C)(C)CCCNS(=O)(=O)C1=CC=C(OC=CCCCCCCC)C=C1	WYYWCMPHVOTIRY-UHFFFAOYSA-M	Organic compounds	Benzenoids	Benzene and substituted derivatives	Benzenesulfonamides	Benzenesulfonamides	This compound belongs to the class of organic compounds known as benzenesulfonamides. These are organic compounds containing a sulfonamide group that is S-linked to a benzene ring.	Aromatic homomonocyclic compounds
3809	59493-82-2	Benzenesulfonyl chloride, 4-[(undecafluorohexenyl)oxy]- (9CI)	p-Perfluorohexenyloxybenzenesulfonyl chloride	C12 H4 Cl F11 O3 S	FC(OC1=CC=C(C=C1)S(Cl)(=O)=O)=C(F)C(F)(F)C(F)(F)C(F)(F)C(F)(F)F		404	n:1 fluorotelomer-based non-polymers	1	5	1	1	0	0	59493-81-1	0		FC(OC1=CC=C(C=C1)S(Cl)(=O)=O)=C(F)C(F)(F)C(F)(F)C(F)(F)C(F)(F)F	NA	NA	NA	NA	No splittable bond found for the input molecule FC(OC1=CC=C(C=C1)S(Cl)(=O)=O)=C(F)C(F)(F)C(F)(F)C(F)(F)C(F)(F)F	2			59493-82-2	FC(OC1=CC=C(C=C1)S(Cl)(=O)=O)=C(F)C(F)(F)C(F)(F)C(F)(F)C(F)(F)F	JHPOMBWYTNUPKL-UHFFFAOYSA-N	Organic compounds	Benzenoids	Benzene and substituted derivatives	Benzenesulfonyl compounds	Benzenesulfonyl chlorides	This compound belongs to the class of organic compounds known as benzenesulfonyl chlorides. These are aromatic compounds containing a benzenesulfonyl group, where the sulfonyl moiety is singly boned to a chloride atom.	Aromatic homomonocyclic compounds	SMILES			59493-82-2	C(OC1=CC=C(C=C1)S(Cl)(=O)=O)=CCCCC	AKLSMPDNYHAYKE-UHFFFAOYSA-N	Organic compounds	Benzenoids	Benzene and substituted derivatives	Benzenesulfonyl compounds	Benzenesulfonyl chlorides	This compound belongs to the class of organic compounds known as benzenesulfonyl chlorides. These are aromatic compounds containing a benzenesulfonyl group, where the sulfonyl moiety is singly boned to a chloride atom.	Aromatic homomonocyclic compounds
3810	59493-84-4	Benzenesulfonic acid, 4-[(undecafluorohexen-1-yl)oxy]-, sodium salt (1:1)	Benzenesulfonic acid, 4-[(undecafluorohexenyl)oxy]-, sodium salt (9CI); Sodium 4-perfluorohexenyloxybenzenesulfonate; p-Perfluorohexenyloxybenzenesulfonic acid sodium salt	C12 H5 F11 O4 S . Na	[Na+].[O-]S(=O)(=O)C1=CC=C(OC(F)=C(F)C(F)(F)C(F)(F)C(F)(F)C(F)(F)F)C=C1	58334-59-1	404	n:1 fluorotelomer-based non-polymers	1	5	1	1	0	0	59493-83-3	0		[Na+].[O-]S(=O)(=O)C1=CC=C(OC(F)=C(F)C(F)(F)C(F)(F)C(F)(F)C(F)(F)F)C=C1	NA	NA	NA	NA	No splittable bond found for the input molecule [Na+].[O-]S(=O)(=O)C1=CC=C(OC(F)=C(F)C(F)(F)C(F)(F)C(F)(F)C(F)(F)F)C=C1	2			59493-84-4	[Na+].[O-]S(=O)(=O)C1=CC=C(OC(F)=C(F)C(F)(F)C(F)(F)C(F)(F)C(F)(F)F)C=C1	NGRPXRLJJPIWEW-UHFFFAOYSA-M	Organic compounds	Benzenoids	Benzene and substituted derivatives	Benzenesulfonic acids and derivatives	Benzenesulfonic acids and derivatives	This compound belongs to the class of organic compounds known as benzenesulfonic acids and derivatives. These are organic compounds containing a sulfonic acid or a derivative thereof that is linked to a benzene ring.	Aromatic homomonocyclic compounds	SMILES			59493-84-4	[Na+].[O-]S(=O)(=O)C1=CC=C(OC=CCCCC)C=C1	XBHQONVBUYAHKN-UHFFFAOYSA-M	Organic compounds	Benzenoids	Benzene and substituted derivatives	Benzenesulfonic acids and derivatives	Benzenesulfonic acids and derivatives	This compound belongs to the class of organic compounds known as benzenesulfonic acids and derivatives. These are organic compounds containing a sulfonic acid or a derivative thereof that is linked to a benzene ring.	Aromatic homomonocyclic compounds
3811	59536-15-1	Benzenesulfonyl chloride, 4-[(heptadecafluorononen-1-yl)oxy]-	Benzenesulfonyl chloride, 4-[(heptadecafluorononenyl)oxy]- (9CI); 4-[(Heptadecafluorononen-1-yl)oxy]benzenesulfonyl chloride; p-Perfluorononenyloxybenzenesulfonyl chloride	C15 H4 Cl F17 O3 S	FC(OC1=CC=C(C=C1)S(Cl)(=O)=O)=C(F)C(F)(F)C(F)(F)C(F)(F)C(F)(F)C(F)(F)C(F)(F)C(F)(F)F	1403457-76-0	404	n:1 fluorotelomer-based non-polymers	1	8	1	1	0	0	59536-14-0	0		FC(OC1=CC=C(C=C1)S(Cl)(=O)=O)=C(F)C(F)(F)C(F)(F)C(F)(F)C(F)(F)C(F)(F)C(F)(F)C(F)(F)F	NA	NA	NA	NA	No splittable bond found for the input molecule FC(OC1=CC=C(C=C1)S(Cl)(=O)=O)=C(F)C(F)(F)C(F)(F)C(F)(F)C(F)(F)C(F)(F)C(F)(F)C(F)(F)F	2			59536-15-1	FC(OC1=CC=C(C=C1)S(Cl)(=O)=O)=C(F)C(F)(F)C(F)(F)C(F)(F)C(F)(F)C(F)(F)C(F)(F)C(F)(F)F	PPJLYJGIFDYVNT-UHFFFAOYSA-N	Organic compounds	Benzenoids	Benzene and substituted derivatives	Benzenesulfonyl compounds	Benzenesulfonyl chlorides	This compound belongs to the class of organic compounds known as benzenesulfonyl chlorides. These are aromatic compounds containing a benzenesulfonyl group, where the sulfonyl moiety is singly boned to a chloride atom.	Aromatic homomonocyclic compounds	SMILES			59536-15-1	C(OC1=CC=C(C=C1)S(Cl)(=O)=O)=CCCCCCCC	SPVPQTVAEKHKGH-UHFFFAOYSA-N	Organic compounds	Benzenoids	Benzene and substituted derivatives	Benzenesulfonyl compounds	Benzenesulfonyl chlorides	This compound belongs to the class of organic compounds known as benzenesulfonyl chlorides. These are aromatic compounds containing a benzenesulfonyl group, where the sulfonyl moiety is singly boned to a chloride atom.	Aromatic homomonocyclic compounds
3830	#VALUE!	Phosphonic acid, P-[[4-[(heptadecafluorononen-1-yl)oxy]phenyl]methyl]-	Phosphonic acid, [[4-[(heptadecafluorononenyl)oxy]phenyl]methyl]- (9CI); P-[[4-[(Heptadecafluorononen-1-yl)oxy]phenyl]methyl]phosphonic acid	C16 H8 F17 O4 P	OP(O)(=O)CC1=CC=C(OC(F)=C(F)C(F)(F)C(F)(F)C(F)(F)C(F)(F)C(F)(F)C(F)(F)C(F)(F)F)C=C1		404	n:1 fluorotelomer-based non-polymers	1	8	1	1	0	0	###############################################################################################################################################################################################################################################################	0		OP(O)(=O)CC1=CC=C(OC(F)=C(F)C(F)(F)C(F)(F)C(F)(F)C(F)(F)C(F)(F)C(F)(F)C(F)(F)F)C=C1	NA	NA	NA	NA	No splittable bond found for the input molecule OP(O)(=O)CC1=CC=C(OC(F)=C(F)C(F)(F)C(F)(F)C(F)(F)C(F)(F)C(F)(F)C(F)(F)C(F)(F)F)C=C1	2			#VALUE!	OP(O)(=O)CC1=CC=C(OC(F)=C(F)C(F)(F)C(F)(F)C(F)(F)C(F)(F)C(F)(F)C(F)(F)C(F)(F)F)C=C1	AIOYDPRIRKONCK-UHFFFAOYSA-N	Organic compounds	Benzenoids	Benzene and substituted derivatives	Phenoxy compounds	Phenoxy compounds	This compound belongs to the class of organic compounds known as phenoxy compounds. These are aromatic compounds contaning a phenoxy group.	Aromatic homomonocyclic compounds	SMILES			#VALUE!	OP(O)(=O)CC1=CC=C(OC=CCCCCCCC)C=C1	UOGPRKFNIKIPRI-UHFFFAOYSA-N	Organic compounds	Benzenoids	Benzene and substituted derivatives	Phenoxy compounds	Phenoxy compounds	This compound belongs to the class of organic compounds known as phenoxy compounds. These are aromatic compounds contaning a phenoxy group.	Aromatic homomonocyclic compounds
3833	63661-51-8	Phosphonic acid, [[4-[(heptadecafluorononenyl)oxy]phenyl]methyl]-, monosodium salt (9CI)	Monosodium 4-perfluorononenyloxybenzylphosphonate	C16 H8 F17 O4 P . Na	[Na+].OP([O-])(=O)CC1=CC=C(OC(F)=C(F)C(F)(F)C(F)(F)C(F)(F)C(F)(F)C(F)(F)C(F)(F)C(F)(F)F)C=C1		404	n:1 fluorotelomer-based non-polymers	1	8	1	1	0	0	###############################################################################################################################################################################################################################################################	1	description unclear; categorisation uncertain; chain length of degradation products uncertain	[Na+].OP([O-])(=O)CC1=CC=C(OC(F)=C(F)C(F)(F)C(F)(F)C(F)(F)C(F)(F)C(F)(F)C(F)(F)C(F)(F)F)C=C1	NA	NA	NA	NA	No splittable bond found for the input molecule [Na+].OP([O-])(=O)CC1=CC=C(OC(F)=C(F)C(F)(F)C(F)(F)C(F)(F)C(F)(F)C(F)(F)C(F)(F)C(F)(F)F)C=C1	2			63661-51-8	[Na+].OP([O-])(=O)CC1=CC=C(OC(F)=C(F)C(F)(F)C(F)(F)C(F)(F)C(F)(F)C(F)(F)C(F)(F)C(F)(F)F)C=C1	FEHZEDPXNRZXCE-UHFFFAOYSA-M	Organic compounds	Benzenoids	Benzene and substituted derivatives	Phenoxy compounds	Phenoxy compounds	This compound belongs to the class of organic compounds known as phenoxy compounds. These are aromatic compounds contaning a phenoxy group.	Aromatic homomonocyclic compounds	SMILES			63661-51-8	[Na+].OP([O-])(=O)CC1=CC=C(OC=CCCCCCCC)C=C1	AHSFHZDACHBIKC-UHFFFAOYSA-M	Organic compounds	Benzenoids	Benzene and substituted derivatives	Phenoxy compounds	Phenoxy compounds	This compound belongs to the class of organic compounds known as phenoxy compounds. These are aromatic compounds contaning a phenoxy group.	Aromatic homomonocyclic compounds
3840	64910-98-1	Benzenesulfonic acid, 4-[(nonadecafluorodecenyl)oxy]-, sodium salt (9CI)		C16 H5 F19 O4 S . Na	OS(=O)(=O)C1=CC=C(OC(F)(F)C(F)(F)C(F)(F)C(F)(F)C(F)(F)C(F)(F)C(F)(F)C(F)(F)C(F)=C(F)F)C=C1		404	n:1 fluorotelomer-based non-polymers	1	9	1	1	0	0	64910-97-0	1	description unclear; categorisation uncertain; chain length of degradation products uncertain	OS(=O)(=O)C1=CC=C(OC(F)(F)C(F)(F)C(F)(F)C(F)(F)C(F)(F)C(F)(F)C(F)(F)C(F)(F)C(F)=C(F)F)C=C1	OS(=O)(=O)C1=CC=C(O)C=C1	C(F)(F)C(F)(F)C(F)(F)C(F)(F)C(F)(F)C(F)(F)C(F)(F)C(F)(F)C(F)=C(F)F	1			5			64910-98-1	OS(=O)(=O)C1=CC=C(OC(F)(F)C(F)(F)C(F)(F)C(F)(F)C(F)(F)C(F)(F)C(F)(F)C(F)(F)C(F)=C(F)F)C=C1	CJGYUIJKVJLYKU-UHFFFAOYSA-N	Organic compounds	Benzenoids	Benzene and substituted derivatives	Benzenesulfonic acids and derivatives	Benzenesulfonic acids and derivatives	This compound belongs to the class of organic compounds known as benzenesulfonic acids and derivatives. These are organic compounds containing a sulfonic acid or a derivative thereof that is linked to a benzene ring.	Aromatic homomonocyclic compounds	SMILES			64910-98-1	OS(=O)(=O)C1=CC=C(OCCCCCCCCC=C)C=C1	DYHNJXKWSQAAMT-UHFFFAOYSA-N	Organic compounds	Benzenoids	Benzene and substituted derivatives	Benzenesulfonic acids and derivatives	Benzenesulfonic acids and derivatives	This compound belongs to the class of organic compounds known as benzenesulfonic acids and derivatives. These are organic compounds containing a sulfonic acid or a derivative thereof that is linked to a benzene ring.	Aromatic homomonocyclic compounds
[truncated: 42 more columns]

## Sheet: Perfluoroalkanoyl
							Category in the OECD list											Split result								Scenario i)													Scenario ii)
ID_in_OECD_list	CAS_Number	Chemical_Name	Synonyms	Molecular_Formula	SMILES	Previously_used_CAS_Number	Structure_Category	Structure_Category_Name	Number_of_Functional_Groups	Perfluoroalkyl_Chain_Length	Linear_or_Branched_Isomer	X.Potential._precursor_to_PFAAs_in_the_environment.biota	Polymer	Mixture	Related_Chemicals	Uncertainty_in_Structure_Categorisation	Note	SMILES_in	R_group	CnF2n+1-X	N_PFAS_Groups_Out	SplitSMARTS (X)	SplitPFAS_errorMsg	Error_code	CAS_Number_OriginalMolecule	SMILES	new_InChIKey	kingdom_name	superclass_name	class_name	subclass_name	direct_parent_name	description	molecular_framework	ClassyFireSource	MSG	query_id	CAS_Number_OriginalMolecule	no_F_SMILES	new_InChIKey	kingdom_name	superclass_name	class_name	subclass_name	direct_parent_name	description	molecular_framework	ClassyFireSource	MSG
139	375-22-4	Butanoic acid, 2,2,3,3,4,4,4-heptafluoro-	Butanoic acid, heptafluoro- (9CI); Butyric acid, heptafluoro- (6CI,8CI); 2,2,3,3,4,4,4-Heptafluorobutanoic acid; FC 23; Fluorad FC 23; H 0024; HFBA; Heptafluorobutanoic acid; Heptafluorobutyric acid; NSC 820; Perfluorobutanoic acid; Perfluorobutyric acid; Perfluoropropanecarboxylic acid	C4 H F7 O2	OC(=O)C(F)(F)C(F)(F)C(F)(F)F		102	perfluoroalkyl carboxylic acids (PFCAs), their salts and esters	1	3	1	0	0	0	NA	0		OC(=O)C(F)(F)C(F)(F)C(F)(F)F	O	C(=O)C(F)(F)C(F)(F)C(F)(F)F	1	C(=O)			375-22-4	OC(=O)C(F)(F)C(F)(F)C(F)(F)F	YPJUNDFVDDCYIH-UHFFFAOYSA-N	Organic compounds	Organohalogen compounds	Alkyl halides	Alkyl fluorides	Perfluoroalkyl carboxylic acid and derivatives	This compound belongs to the class of organic compounds known as perfluoroalkyl carboxylic acid and derivatives. These are organic compounds containing an alkyl chain attached to the C-alpha of a carboxylic acid group (or a derivative thereof), where all hydrogens of the alkyl chain are replaced by fluorine atoms.	Aliphatic acyclic compounds	SMILES			375-22-4	OC(=O)CCC	FERIUCNNQQJTOY-UHFFFAOYSA-N	Organic compounds	Lipids and lipid-like molecules	Fatty Acyls	Fatty acids and conjugates	Straight chain fatty acids	This compound belongs to the class of organic compounds known as straight chain fatty acids. These are fatty acids with a straight aliphatic chain.	Aliphatic acyclic compounds	SMILES
187	375-16-6	Butanoyl chloride, 2,2,3,3,4,4,4-heptafluoro-	Butanoyl chloride, heptafluoro- (6CI,9CI); Butyryl chloride, heptafluoro- (7CI,8CI); 2,2,3,3,4,4,4-Heptafluorobutanoyl chloride; Heptafluoro-n-butyryl chloride; Heptafluorobutanoyl chloride; Heptafluorobutyric chloride; Heptafluorobutyryl chloride; Perfluorobutanoic acid chloride; Perfluorobutanoyl chloride; Perfluorobutyryl chloride	C4 Cl F7 O	FC(F)(F)C(F)(F)C(F)(F)C(Cl)=O		101	perfluoroalkyl carbonyl halides	1	3	1	1	0	0	NA	0		FC(F)(F)C(F)(F)C(F)(F)C(Cl)=O	Cl	FC(F)(F)C(F)(F)C(F)(F)C=O	1	C(=O)			375-16-6	FC(F)(F)C(F)(F)C(F)(F)C(Cl)=O	WFELVFKXQJYPSL-UHFFFAOYSA-N	Organic compounds	Organohalogen compounds	Acyl halides	Acyl chlorides	Acyl chlorides	This compound belongs to the class of organic compounds known as acyl chlorides. These are organic compounds containing the functional group -CO-Cl.	Aliphatic acyclic compounds	SMILES			375-16-6	CCCC(Cl)=O	DVECBJCOGJRVPX-UHFFFAOYSA-N	Organic compounds	Organohalogen compounds	Acyl halides	Acyl chlorides	Acyl chlorides	This compound belongs to the class of organic compounds known as acyl chlorides. These are organic compounds containing the functional group -CO-Cl.	Aliphatic acyclic compounds	SMILES
347	375-62-2	Pentanoyl fluoride, 2,2,3,3,4,4,5,5,5-nonafluoro-	Pentanoyl fluoride, nonafluoro- (9CI); Valeryl fluoride, nonafluoro- (6CI,8CI); 2,2,3,3,4,4,5,5,5-Nonafluoropentanoyl fluoride; Perfluoropentanoyl fluoride; Perfluorovaleroyl fluoride; Perfluorovaleryl fluoride	C5 F10 O	FC(=O)C(F)(F)C(F)(F)C(F)(F)C(F)(F)F		101	perfluoroalkyl carbonyl halides	1	4	1	0	0	0	NA	0		FC(=O)C(F)(F)C(F)(F)C(F)(F)C(F)(F)F	NA	NA	NA	NA	No splittable bond found for the input molecule FC(=O)C(F)(F)C(F)(F)C(F)(F)C(F)(F)F	4	375-62-2	FC(=O)C(F)(F)C(F)(F)C(F)(F)C(F)(F)F	RUFSXELMOQBMOF-UHFFFAOYSA-N	Organic compounds	Organohalogen compounds	Acyl halides	Acyl fluorides	Acyl fluorides	This compound belongs to the class of organic compounds known as acyl fluorides. These are organic compounds containing the functional group -CO-F.	Aliphatic acyclic compounds	SMILES			375-62-2	FC(=O)CCCC	KSGGIONYAUAWPY-UHFFFAOYSA-N	Organic compounds	Organohalogen compounds	Acyl halides	Acyl fluorides	Acyl fluorides	This compound belongs to the class of organic compounds known as acyl fluorides. These are organic compounds containing the functional group -CO-F.	Aliphatic acyclic compounds	SMILES
423	356-24-1	Butanoic acid, 2,2,3,3,4,4,4-heptafluoro-, methyl ester	Butanoic acid, heptafluoro-, methyl ester (9CI); Butyric acid, heptafluoro-, methyl ester (6CI,7CI,8CI); Heptafluorobutyric acid methyl ester; Methyl heptafluorobutanoate; Methyl heptafluorobutyrate; Methyl perfluorobutanoate; Methyl perfluorobutyrate	C5 H3 F7 O2	COC(=O)C(F)(F)C(F)(F)C(F)(F)F		102	perfluoroalkyl carboxylic acids (PFCAs), their salts and esters	1	3	1	1	0	0	NA	0		COC(=O)C(F)(F)C(F)(F)C(F)(F)F	CO	C(=O)C(F)(F)C(F)(F)C(F)(F)F	1	C(=O)			356-24-1	COC(=O)C(F)(F)C(F)(F)C(F)(F)F	MRPUVAKBXDBGJQ-UHFFFAOYSA-N	Organic compounds	Organohalogen compounds	Alkyl halides	Alkyl fluorides	Perfluoroalkyl carboxylic acid and derivatives	This compound belongs to the class of organic compounds known as perfluoroalkyl carboxylic acid and derivatives. These are organic compounds containing an alkyl chain attached to the C-alpha of a carboxylic acid group (or a derivative thereof), where all hydrogens of the alkyl chain are replaced by fluorine atoms.	Aliphatic acyclic compounds	SMILES			356-24-1	COC(=O)CCC	UUIQMZJEGPQKFD-UHFFFAOYSA-N	Organic compounds	Lipids and lipid-like molecules	Fatty Acyls	Fatty acid esters	Fatty acid methyl esters	This compound belongs to the class of organic compounds known as fatty acid methyl esters. These are compounds containing a fatty acid that is esterified with a methyl group. They have the general structure RC(=O)OR', where R=fatty aliphatic tail or organyl group and R'=methyl group.	Aliphatic acyclic compounds	SMILES
426	662-50-0	Butanamide, 2,2,3,3,4,4,4-heptafluoro-	Butyramide, 2,2,3,3,4,4,4-heptafluoro- (6CI,7CI,8CI); 2,2,3,3,4,4,4-Heptafluorobutanamide; Heptafluorobutanamide; Heptafluorobutanoic acid amide; Heptafluorobutyramide; NSC 9451; Perfluorobutyramide	C4 H2 F7 N O	NC(=O)C(F)(F)C(F)(F)C(F)(F)F		103	other perfluoroalkyl carbonyl-based nonpolymers	1	3	1	1	0	0	NA	0		NC(=O)C(F)(F)C(F)(F)C(F)(F)F	[NH2]	C(=O)C(F)(F)C(F)(F)C(F)(F)F	1	C(=O)			662-50-0	NC(=O)C(F)(F)C(F)(F)C(F)(F)F	FOBJABJCODOMEO-UHFFFAOYSA-N	Organic compounds	Organohalogen compounds	Alkyl halides	Alkyl fluorides	Perfluoroalkyl carboxylic acid and derivatives	This compound belongs to the class of organic compounds known as perfluoroalkyl carboxylic acid and derivatives. These are organic compounds containing an alkyl chain attached to the C-alpha of a carboxylic acid group (or a derivative thereof), where all hydrogens of the alkyl chain are replaced by fluorine atoms.	Aliphatic acyclic compounds	SMILES			662-50-0	NC(=O)CCC	DNSISZSEWVHGLH-UHFFFAOYSA-N	Organic compounds	Lipids and lipid-like molecules	Fatty Acyls	Fatty amides	Fatty amides	This compound belongs to the class of organic compounds known as fatty amides. These are carboxylic acid amide derivatives of fatty acids, that are formed from a fatty acid and an amine.	Aliphatic acyclic compounds	SMILES
428	2706-90-3	Pentanoic acid, 2,2,3,3,4,4,5,5,5-nonafluoro-	Pentanoic acid, nonafluoro- (9CI); Valeric acid, nonafluoro- (6CI,8CI); 2,2,3,3,4,4,5,5,5-Nonafluoropentanoic acid; NSC 18404; Nonafluoropentanoic acid; Nonafluorovaleric acid; PFPeA; Perfluoropentanoic acid; Perfluorovaleric acid	C5 H F9 O2	OC(=O)C(F)(F)C(F)(F)C(F)(F)C(F)(F)F		102	perfluoroalkyl carboxylic acids (PFCAs), their salts and esters	1	4	1	0	0	0	NA	0		OC(=O)C(F)(F)C(F)(F)C(F)(F)C(F)(F)F	O	C(=O)C(F)(F)C(F)(F)C(F)(F)C(F)(F)F	1	C(=O)			2706-90-3	OC(=O)C(F)(F)C(F)(F)C(F)(F)C(F)(F)F	CXZGQIAOTKWCDB-UHFFFAOYSA-N	Organic compounds	Organohalogen compounds	Alkyl halides	Alkyl fluorides	Perfluoroalkyl carboxylic acid and derivatives	This compound belongs to the class of organic compounds known as perfluoroalkyl carboxylic acid and derivatives. These are organic compounds containing an alkyl chain attached to the C-alpha of a carboxylic acid group (or a derivative thereof), where all hydrogens of the alkyl chain are replaced by fluorine atoms.	Aliphatic acyclic compounds	SMILES			2706-90-3	OC(=O)CCCC	NQPDZGIKBAWPEJ-UHFFFAOYSA-N	Organic compounds	Lipids and lipid-like molecules	Fatty Acyls	Fatty acids and conjugates	Straight chain fatty acids	This compound belongs to the class of organic compounds known as straight chain fatty acids. These are fatty acids with a straight aliphatic chain.	Aliphatic acyclic compounds	SMILES
518	355-38-4	Hexanoyl fluoride, 2,2,3,3,4,4,5,5,6,6,6-undecafluoro-	Hexanoyl fluoride, undecafluoro- (6CI,7CI,8CI,9CI); 2,2,3,3,4,4,5,5,6,6,6-Undecafluorohexanoyl fluoride; Perfluorohexanoyl fluoride; Undecafluorohexanoyl fluoride	C6 F12 O	FC(=O)C(F)(F)C(F)(F)C(F)(F)C(F)(F)C(F)(F)F		101	perfluoroalkyl carbonyl halides	1	5	1	1	0	0	NA	0		FC(=O)C(F)(F)C(F)(F)C(F)(F)C(F)(F)C(F)(F)F	NA	NA	NA	NA	No splittable bond found for the input molecule FC(=O)C(F)(F)C(F)(F)C(F)(F)C(F)(F)C(F)(F)F	4	355-38-4	FC(=O)C(F)(F)C(F)(F)C(F)(F)C(F)(F)C(F)(F)F	XATLHBQMSOZWBO-UHFFFAOYSA-N	Organic compounds	Organohalogen compounds	Acyl halides	Acyl fluorides	Acyl fluorides	This compound belongs to the class of organic compounds known as acyl fluorides. These are organic compounds containing the functional group -CO-F.	Aliphatic acyclic compounds	SMILES			355-38-4	FC(=O)CCCCC	AURYBMCZYGIOJH-UHFFFAOYSA-N	Organic compounds	Organohalogen compounds	Acyl halides	Acyl fluorides	Acyl fluorides	This compound belongs to the class of organic compounds known as acyl fluorides. These are organic compounds containing the functional group -CO-F.	Aliphatic acyclic compounds	SMILES
635	307-24-4	Hexanoic acid, 2,2,3,3,4,4,5,5,6,6,6-undecafluoro-	Hexanoic acid, undecafluoro- (6CI,7CI,8CI,9CI); 2,2,3,3,4,4,5,5,6,6,6-Undecafluorohexanoic acid; NSC 5213; PFHxA; Perfluoro-1-pentanecarboxylic acid; Perfluorocaproic acid; Perfluorohexanoic acid; Undecafluorocaproic acid; Undecafluorohexanoic acid	C6 H F11 O2	OC(=O)C(F)(F)C(F)(F)C(F)(F)C(F)(F)C(F)(F)F		102	perfluoroalkyl carboxylic acids (PFCAs), their salts and esters	1	5	1	0	0	0	NA	0		OC(=O)C(F)(F)C(F)(F)C(F)(F)C(F)(F)C(F)(F)F	O	C(=O)C(F)(F)C(F)(F)C(F)(F)C(F)(F)C(F)(F)F	1	C(=O)			307-24-4	OC(=O)C(F)(F)C(F)(F)C(F)(F)C(F)(F)C(F)(F)F	PXUULQAPEKKVAH-UHFFFAOYSA-N	Organic compounds	Organohalogen compounds	Alkyl halides	Alkyl fluorides	Perfluoroalkyl carboxylic acid and derivatives	This compound belongs to the class of organic compounds known as perfluoroalkyl carboxylic acid and derivatives. These are organic compounds containing an alkyl chain attached to the C-alpha of a carboxylic acid group (or a derivative thereof), where all hydrogens of the alkyl chain are replaced by fluorine atoms.	Aliphatic acyclic compounds	SMILES			307-24-4	OC(=O)CCCCC	FUZZWVXGSFPDMH-UHFFFAOYSA-N	Organic compounds	Lipids and lipid-like molecules	Fatty Acyls	Fatty acids and conjugates	Medium-chain fatty acids	This compound belongs to the class of organic compounds known as medium-chain fatty acids. These are fatty acids with an aliphatic tail that contains between 4 and 12 carbon atoms.	Aliphatic acyclic compounds	SMILES
636	356-27-4	Butanoic acid, 2,2,3,3,4,4,4-heptafluoro-, ethyl ester	Butanoic acid, heptafluoro-, ethyl ester (9CI); Butyric acid, heptafluoro-, ethyl ester (6CI,8CI); Ethyl 2,2,3,3,4,4,4-heptafluorobutanoate; Ethyl 2,2,3,3,4,4,4-heptafluorobutyrate; Ethyl heptafluorobutanoate; Ethyl heptafluorobutyrate; Ethyl perfluorobutanoate; Ethyl perfluorobutyrate; NSC 3639	C6 H5 F7 O2	CCOC(=O)C(F)(F)C(F)(F)C(F)(F)F		102	perfluoroalkyl carboxylic acids (PFCAs), their salts and esters	1	3	1	1	0	0	NA	0		CCOC(=O)C(F)(F)C(F)(F)C(F)(F)F	CCO	C(=O)C(F)(F)C(F)(F)C(F)(F)F	1	C(=O)			356-27-4	CCOC(=O)C(F)(F)C(F)(F)C(F)(F)F	JVHJRIQPDBCRRE-UHFFFAOYSA-N	Organic compounds	Organohalogen compounds	Alkyl halides	Alkyl fluorides	Perfluoroalkyl carboxylic acid and derivatives	This compound belongs to the class of organic compounds known as perfluoroalkyl carboxylic acid and derivatives. These are organic compounds containing an alkyl chain attached to the C-alpha of a carboxylic acid group (or a derivative thereof), where all hydrogens of the alkyl chain are replaced by fluorine atoms.	Aliphatic acyclic compounds	SMILES			356-27-4	CCOC(=O)CCC	OBNCKNCVKJNDBV-UHFFFAOYSA-N	Organic compounds	Lipids and lipid-like molecules	Fatty Acyls	Fatty acid esters	Fatty acid esters	This compound belongs to the class of organic compounds known as fatty acid esters. These are carboxylic ester derivatives of a fatty acid.	Aliphatic acyclic compounds	SMILES
667	375-84-8	Heptanoyl fluoride, 2,2,3,3,4,4,5,5,6,6,7,7,7-tridecafluoro-	Heptanoyl fluoride, tridecafluoro- (6CI,8CI,9CI); 2,2,3,3,4,4,5,5,6,6,7,7,7-Tridecafluoroheptanoyl fluoride; (Perfluorohexyl)carbonyl fluoride; Perfluoroheptanoyl fluoride	C7 F14 O	FC(=O)C(F)(F)C(F)(F)C(F)(F)C(F)(F)C(F)(F)C(F)(F)F	1894-91-3	101	perfluoroalkyl carbonyl halides	1	6	1	1	0	0	NA	0		FC(=O)C(F)(F)C(F)(F)C(F)(F)C(F)(F)C(F)(F)C(F)(F)F	NA	NA	NA	NA	No splittable bond found for the input molecule FC(=O)C(F)(F)C(F)(F)C(F)(F)C(F)(F)C(F)(F)C(F)(F)F	4	375-84-8	FC(=O)C(F)(F)C(F)(F)C(F)(F)C(F)(F)C(F)(F)C(F)(F)F	XLIFBQWTSCGUEB-UHFFFAOYSA-N	Organic compounds	Organohalogen compounds	Acyl halides	Acyl fluorides	Acyl fluorides	This compound belongs to the class of organic compounds known as acyl fluorides. These are organic compounds containing the functional group -CO-F.	Aliphatic acyclic compounds	SMILES			375-84-8	FC(=O)CCCCCC	QBVWKTUYRNFLKD-UHFFFAOYSA-N	Organic compounds	Organohalogen compounds	Acyl halides	Acyl fluorides	Acyl fluorides	This compound belongs to the class of organic compounds known as acyl fluorides. These are organic compounds containing the functional group -CO-F.	Aliphatic acyclic compounds	SMILES
739	335-66-0	Octanoyl fluoride, 2,2,3,3,4,4,5,5,6,6,7,7,8,8,8-pentadecafluoro-	Octanoyl fluoride, pentadecafluoro- (6CI,7CI,8CI,9CI); 2,2,3,3,4,4,5,5,6,6,7,7,8,8,8-Pentadecafluorooctanoyl fluoride; F 06161; Pentadecafluorooctanoyl fluoride; Perfluorocaprylic acid fluoride; Perfluorooctanoic acid fluoride; Perfluorooctanoyl fluoride	C8 F16 O	FC(=O)C(F)(F)C(F)(F)C(F)(F)C(F)(F)C(F)(F)C(F)(F)C(F)(F)F		101	perfluoroalkyl carbonyl halides	1	7	1	1	0	0	NA	0		FC(=O)C(F)(F)C(F)(F)C(F)(F)C(F)(F)C(F)(F)C(F)(F)C(F)(F)F	NA	NA	NA	NA	No splittable bond found for the input molecule FC(=O)C(F)(F)C(F)(F)C(F)(F)C(F)(F)C(F)(F)C(F)(F)C(F)(F)F	4	335-66-0	FC(=O)C(F)(F)C(F)(F)C(F)(F)C(F)(F)C(F)(F)C(F)(F)C(F)(F)F	ZILWJLIFAGWGLE-UHFFFAOYSA-N	Organic compounds	Organohalogen compounds	Acyl halides	Acyl fluorides	Acyl fluorides	This compound belongs to the class of organic compounds known as acyl fluorides. These are organic compounds containing the functional group -CO-F.	Aliphatic acyclic compounds	SMILES			335-66-0	FC(=O)CCCCCCC	WQTODPKAIPOSLC-UHFFFAOYSA-N	Organic compounds	Organohalogen compounds	Acyl halides	Acyl fluorides	Acyl fluorides	This compound belongs to the class of organic compounds known as acyl fluorides. These are organic compounds containing the functional group -CO-F.	Aliphatic acyclic compounds	SMILES
745	52447-22-0	Heptanoyl chloride, 2,2,3,3,4,4,5,5,6,6,7,7,7-tridecafluoro-	Heptanoyl chloride, tridecafluoro- (9CI); 2,2,3,3,4,4,5,5,6,6,7,7,7-Tridecafluoroheptanoyl chloride; Perfluoroheptanoyl chloride	C7 Cl F13 O	FC(F)(F)C(F)(F)C(F)(F)C(F)(F)C(F)(F)C(F)(F)C(Cl)=O		101	perfluoroalkyl carbonyl halides	1	6	1	1	0	0	NA	0		FC(F)(F)C(F)(F)C(F)(F)C(F)(F)C(F)(F)C(F)(F)C(Cl)=O	Cl	FC(F)(F)C(F)(F)C(F)(F)C(F)(F)C(F)(F)C(F)(F)C=O	1	C(=O)			52447-22-0	FC(F)(F)C(F)(F)C(F)(F)C(F)(F)C(F)(F)C(F)(F)C(Cl)=O	IAHVCTQMGIVZJU-UHFFFAOYSA-N	Organic compounds	Organohalogen compounds	Acyl halides	Acyl chlorides	Acyl chlorides	This compound belongs to the class of organic compounds known as acyl chlorides. These are organic compounds containing the functional group -CO-Cl.	Aliphatic acyclic compounds	SMILES			52447-22-0	CCCCCCC(Cl)=O	UCVODTZQZHMTPN-UHFFFAOYSA-N	Organic compounds	Organohalogen compounds	Acyl halides	Acyl chlorides	Acyl chlorides	This compound belongs to the class of organic compounds known as acyl chlorides. These are organic compounds containing the functional group -CO-Cl.	Aliphatic acyclic compounds	SMILES
751	356-28-5	Butanoic acid, 2,2,3,3,4,4,4-heptafluoro-, ethenyl ester	Butanoic acid, heptafluoro-, ethenyl ester (9CI); Butyric acid, heptafluoro-, vinyl ester (6CI,8CI); Vinyl heptafluorobutanoate; Vinyl heptafluorobutyrate	C6 H3 F7 O2	FC(F)(F)C(F)(F)C(F)(F)C(=O)OC=C		102	perfluoroalkyl carboxylic acids (PFCAs), their salts and esters	1	3	1	1	0	0	NA	0		FC(F)(F)C(F)(F)C(F)(F)C(=O)OC=C	OC=C	FC(F)(F)C(F)(F)C(F)(F)C=O	1	C(=O)			356-28-5	FC(F)(F)C(F)(F)C(F)(F)C(=O)OC=C	CJABYGHRZGXUKQ-UHFFFAOYSA-N	Organic compounds	Organohalogen compounds	Alkyl halides	Alkyl fluorides	Perfluoroalkyl carboxylic acid and derivatives	This compound belongs to the class of organic compounds known as perfluoroalkyl carboxylic acid and derivatives. These are organic compounds containing an alkyl chain attached to the C-alpha of a carboxylic acid group (or a derivative thereof), where all hydrogens of the alkyl chain are replaced by fluorine atoms.	Aliphatic acyclic compounds	SMILES			356-28-5	CCCC(=O)OC=C	MEGHWIAOTJPCHQ-UHFFFAOYSA-N	Organic compounds	Lipids and lipid-like molecules	Fatty Acyls	Fatty acid esters	Fatty acid esters	This compound belongs to the class of organic compounds known as fatty acid esters. These are carboxylic ester derivatives of a fatty acid.	Aliphatic acyclic compounds	SMILES
759	17165-55-8	Butanoic acid, 2,2,3,3,4,4,4-heptafluoro-, 2-propen-1-yl ester	Butanoic acid, heptafluoro-, 2-propenyl ester (9CI); Butyric acid, heptafluoro-, allyl ester (8CI); Allyl perfluorobutyrate	C7 H5 F7 O2	FC(F)(F)C(F)(F)C(F)(F)CC(=O)OC=C		102	perfluoroalkyl carboxylic acids (PFCAs), their salts and esters	1	3	1	1	0	0	NA	0		FC(F)(F)C(F)(F)C(F)(F)CC(=O)OC=C	C(=O)OC=C	FC(F)(F)C(F)(F)C(F)(F)C	1	[CH2]			17165-55-8	FC(F)(F)C(F)(F)C(F)(F)CC(=O)OC=C	JPAQRQFVIPWHNE-UHFFFAOYSA-N	Organic compounds	Lipids and lipid-like molecules	Fatty Acyls	Fatty acid esters	Fatty acid esters	This compound belongs to the class of organic compounds known as fatty acid esters. These are carboxylic ester derivatives of a fatty acid.	Aliphatic acyclic compounds	SMILES			17165-55-8	CCCCC(=O)OC=C	BLZSRIYYOIZLJL-UHFFFAOYSA-N	Organic compounds	Lipids and lipid-like molecules	Fatty Acyls	Fatty acid esters	Fatty acid esters	This compound belongs to the class of organic compounds known as fatty acid esters. These are carboxylic ester derivatives of a fatty acid.	Aliphatic acyclic compounds	SMILES
773	375-85-9	Heptanoic acid, 2,2,3,3,4,4,5,5,6,6,7,7,7-tridecafluoro-	Heptanoic acid, tridecafluoro- (6CI,8CI,9CI); 2,2,3,3,4,4,5,5,6,6,7,7,7-Tridecafluoroheptanoic acid; PFHpA; Perfluoro-n-heptanoic acid; Perfluoroenanthic acid; Perfluoroheptanoic acid; Tridecafluoroheptanoic acid	C7 H F13 O2	OC(=O)C(F)(F)C(F)(F)C(F)(F)C(F)(F)C(F)(F)C(F)(F)F		102	perfluoroalkyl carboxylic acids (PFCAs), their salts and esters	1	6	1	0	0	0	NA	0		OC(=O)C(F)(F)C(F)(F)C(F)(F)C(F)(F)C(F)(F)C(F)(F)F	O	C(=O)C(F)(F)C(F)(F)C(F)(F)C(F)(F)C(F)(F)C(F)(F)F	1	C(=O)			375-85-9	OC(=O)C(F)(F)C(F)(F)C(F)(F)C(F)(F)C(F)(F)C(F)(F)F	ZWBAMYVPMDSJGQ-UHFFFAOYSA-N	Organic compounds	Organohalogen compounds	Alkyl halides	Alkyl fluorides	Perfluoroalkyl carboxylic acid and derivatives	This compound belongs to the class of organic compounds known as perfluoroalkyl carboxylic acid and derivatives. These are organic compounds containing an alkyl chain attached to the C-alpha of a carboxylic acid group (or a derivative thereof), where all hydrogens of the alkyl chain are replaced by fluorine atoms.	Aliphatic acyclic compounds	SMILES			375-85-9	OC(=O)CCCCCC	MNWFXJYAOYHMED-UHFFFAOYSA-N	Organic compounds	Lipids and lipid-like molecules	Fatty Acyls	Fatty acids and conjugates	Medium-chain fatty acids	This compound belongs to the class of organic compounds known as medium-chain fatty acids. These are fatty acids with an aliphatic tail that contains between 4 and 12 carbon atoms.	Aliphatic acyclic compounds	SMILES
774	13038-26-1	Pentanoic acid, 2,2,3,3,4,4,5,5,5-nonafluoro-, methyl ester	Pentanoic acid, nonafluoro-, methyl ester (9CI); Valeric acid, nonafluoro-, methyl ester (7CI,8CI); Methyl nonafluoropentanoate; Methyl nonafluorovalerate; Methyl perfluoropentanoate; Nonafluoropentanoic acid methyl ester	C6 H3 F9 O2	COC(=O)C(F)(F)C(F)(F)C(F)(F)C(F)(F)F		102	perfluoroalkyl carboxylic acids (PFCAs), their salts and esters	1	4	1	1	0	0	NA	0		COC(=O)C(F)(F)C(F)(F)C(F)(F)C(F)(F)F	CO	C(=O)C(F)(F)C(F)(F)C(F)(F)C(F)(F)F	1	C(=O)			13038-26-1	COC(=O)C(F)(F)C(F)(F)C(F)(F)C(F)(F)F	OSDPSOBLGQUCQX-UHFFFAOYSA-N	Organic compounds	Organohalogen compounds	Alkyl halides	Alkyl fluorides	Perfluoroalkyl carboxylic acid and derivatives	This compound belongs to the class of organic compounds known as perfluoroalkyl carboxylic acid and derivatives. These are organic compounds containing an alkyl chain attached to the C-alpha of a carboxylic acid group (or a derivative thereof), where all hydrogens of the alkyl chain are replaced by fluorine atoms.	Aliphatic acyclic compounds	SMILES			13038-26-1	COC(=O)CCCC	HNBDRPTVWVGKBR-UHFFFAOYSA-N	Organic compounds	Lipids and lipid-like molecules	Fatty Acyls	Fatty acid esters	Fatty acid methyl esters	This compound belongs to the class of organic compounds known as fatty acid methyl esters. These are compounds containing a fatty acid that is esterified with a methyl group. They have the general structure RC(=O)OR', where R=fatty aliphatic tail or organyl group and R'=methyl group.	Aliphatic acyclic compounds	SMILES
803	335-64-8	Octanoyl chloride, 2,2,3,3,4,4,5,5,6,6,7,7,8,8,8-pentadecafluoro-	Octanoyl chloride, pentadecafluoro- (7CI,8CI,9CI); 2,2,3,3,4,4,5,5,6,6,7,7,8,8,8-Pentadecafluorooctanoyl chloride; 2,2,3,3,4,4,5,5,6,6,7,7,8,8,8-Pentadecafluorooctanoic acid chloride; Pentadecafluorooctanoyl chloride; Perfluorocaprylic chloride; Perfluorooctanoic acid chloride; Perfluorooctanoic chloride; Perfluorooctanoyl chloride; n-Perfluorooctanoyl chloride	C8 Cl F15 O	FC(F)(F)C(F)(F)C(F)(F)C(F)(F)C(F)(F)C(F)(F)C(F)(F)C(Cl)=O		101	perfluoroalkyl carbonyl halides	1	7	1	1	0	0	NA	0		FC(F)(F)C(F)(F)C(F)(F)C(F)(F)C(F)(F)C(F)(F)C(F)(F)C(Cl)=O	Cl	FC(F)(F)C(F)(F)C(F)(F)C(F)(F)C(F)(F)C(F)(F)C(F)(F)C=O	1	C(=O)			335-64-8	FC(F)(F)C(F)(F)C(F)(F)C(F)(F)C(F)(F)C(F)(F)C(F)(F)C(Cl)=O	AQQBRCXWZZAFOK-UHFFFAOYSA-N	Organic compounds	Organohalogen compounds	Acyl halides	Acyl chlorides	Acyl chlorides	This compound belongs to the class of organic compounds known as acyl chlorides. These are organic compounds containing the functional group -CO-Cl.	Aliphatic acyclic compounds	SMILES			335-64-8	CCCCCCCC(Cl)=O	REEZZSHJLXOIHL-UHFFFAOYSA-N	Organic compounds	Organohalogen compounds	Acyl halides	Acyl chlorides	Acyl chlorides	This compound belongs to the class of organic compounds known as acyl chlorides. These are organic compounds containing the functional group -CO-Cl.	Aliphatic acyclic compounds	SMILES
848	335-67-1	Octanoic acid, 2,2,3,3,4,4,5,5,6,6,7,7,8,8,8-pentadecafluoro-	Octanoic acid, pentadecafluoro- (8CI,9CI); 2,2,3,3,4,4,5,5,6,6,7,7,8,8,8-Pentadecafluorooctanoic acid; A 5717; EF 201; Eftop EF 201; NSC 95114; PFOA; Pentadecafluoro-n-octanoic acid; Pentadecafluorooctanoic acid; Perfluoro-1-heptanecarboxylic acid; Perfluorocaprylic acid; Perfluoroheptanecarboxylic acid; Perfluorooctanoic acid; n-Perfluorooctanoic acid	C8 H F15 O2	OC(=O)C(F)(F)C(F)(F)C(F)(F)C(F)(F)C(F)(F)C(F)(F)C(F)(F)F	65618-66-8, 71244-15-0	102	perfluoroalkyl carboxylic acids (PFCAs), their salts and esters	1	7	1	0	0	0	NA	0		OC(=O)C(F)(F)C(F)(F)C(F)(F)C(F)(F)C(F)(F)C(F)(F)C(F)(F)F	O	C(=O)C(F)(F)C(F)(F)C(F)(F)C(F)(F)C(F)(F)C(F)(F)C(F)(F)F	1	C(=O)			335-67-1	OC(=O)C(F)(F)C(F)(F)C(F)(F)C(F)(F)C(F)(F)C(F)(F)C(F)(F)F	SNGREZUHAYWORS-UHFFFAOYSA-N	Organic compounds	Organohalogen compounds	Alkyl halides	Alkyl fluorides	Perfluoroalkyl carboxylic acid and derivatives	This compound belongs to the class of organic compounds known as perfluoroalkyl carboxylic acid and derivatives. These are organic compounds containing an alkyl chain attached to the C-alpha of a carboxylic acid group (or a derivative thereof), where all hydrogens of the alkyl chain are replaced by fluorine atoms.	Aliphatic acyclic compounds	SMILES			335-67-1	OC(=O)CCCCCCC	WWZKQHOCKIZLMA-UHFFFAOYSA-N	Organic compounds	Lipids and lipid-like molecules	Fatty Acyls	Fatty acids and conjugates	Medium-chain fatty acids	This compound belongs to the class of organic compounds known as medium-chain fatty acids. These are fatty acids with an aliphatic tail that contains between 4 and 12 carbon atoms.	Aliphatic acyclic compounds	SMILES
916	52447-23-1	Nonanoyl chloride, 2,2,3,3,4,4,5,5,6,6,7,7,8,8,9,9,9-heptadecafluoro-	Nonanoyl chloride, heptadecafluoro- (9CI); 2,2,3,3,4,4,5,5,6,6,7,7,8,8,9,9,9-Heptadecafluorononanoyl chloride; Perfluorononanoic chloride; Perfluorononanoyl chloride	C9 Cl F17 O	FC(F)(F)C(F)(F)C(F)(F)C(F)(F)C(F)(F)C(F)(F)C(F)(F)C(F)(F)C(Cl)=O		101	perfluoroalkyl carbonyl halides	1	8	1	1	0	0	NA	0		FC(F)(F)C(F)(F)C(F)(F)C(F)(F)C(F)(F)C(F)(F)C(F)(F)C(F)(F)C(Cl)=O	Cl	FC(F)(F)C(F)(F)C(F)(F)C(F)(F)C(F)(F)C(F)(F)C(F)(F)C(F)(F)C=O	1	C(=O)			52447-23-1	FC(F)(F)C(F)(F)C(F)(F)C(F)(F)C(F)(F)C(F)(F)C(F)(F)C(F)(F)C(Cl)=O	MPWXHQITWLFMQM-UHFFFAOYSA-N	Organic compounds	Organohalogen compounds	Acyl halides	Acyl chlorides	Acyl chlorides	This compound belongs to the class of organic compounds known as acyl chlorides. These are organic compounds containing the functional group -CO-Cl.	Aliphatic acyclic compounds	SMILES			52447-23-1	CCCCCCCCC(Cl)=O	NTQYXUJLILNTFH-UHFFFAOYSA-N	Organic compounds	Organohalogen compounds	Acyl halides	Acyl chlorides	Acyl chlorides	This compound belongs to the class of organic compounds known as acyl chlorides. These are organic compounds containing the functional group -CO-Cl.	Aliphatic acyclic compounds	SMILES
949	375-95-1	Nonanoic acid, 2,2,3,3,4,4,5,5,6,6,7,7,8,8,9,9,9-heptadecafluoro-	Nonanoic acid, heptadecafluoro- (8CI,9CI); 2,2,3,3,4,4,5,5,6,6,7,7,8,8,9,9,9-Heptadecafluorononanoic acid; C 1800; Heptadecafluorononanoic acid; PFNA; Perfluorononanoic acid; Perfluoropelargonic acid	C9 H F17 O2	OC(=O)C(F)(F)C(F)(F)C(F)(F)C(F)(F)C(F)(F)C(F)(F)C(F)(F)C(F)(F)F		102	perfluoroalkyl carboxylic acids (PFCAs), their salts and esters	1	8	1	0	0	0	NA	0		OC(=O)C(F)(F)C(F)(F)C(F)(F)C(F)(F)C(F)(F)C(F)(F)C(F)(F)C(F)(F)F	O	C(=O)C(F)(F)C(F)(F)C(F)(F)C(F)(F)C(F)(F)C(F)(F)C(F)(F)C(F)(F)F	1	C(=O)			375-95-1	OC(=O)C(F)(F)C(F)(F)C(F)(F)C(F)(F)C(F)(F)C(F)(F)C(F)(F)C(F)(F)F	UZUFPBIDKMEQEQ-UHFFFAOYSA-N	Organic compounds	Organohalogen compounds	Alkyl halides	Alkyl fluorides	Perfluorooctanoic acid and derivatives	This compound belongs to the class of organic compounds known as perfluorooctanoic acid and derivatives. These are organic compounds containing an octyl chain attached to the C-alpha of a carboxylic acid group (or a derivative thereof), where all hydrogens of the octyl chain are replaced by fluorine atoms.	Aliphatic acyclic compounds	SMILES			375-95-1	OC(=O)CCCCCCCC	FBUKVWPVBMHYJY-UHFFFAOYSA-N	Organic compounds	Lipids and lipid-like molecules	Fatty Acyls	Fatty acids and conjugates	Medium-chain fatty acids	This compound belongs to the class of organic compounds known as medium-chain fatty acids. These are fatty acids with an aliphatic tail that contains between 4 and 12 carbon atoms.	Aliphatic acyclic compounds	SMILES
950	424-36-2	Pentanoic acid, 2,2,3,3,4,4,5,5,5-nonafluoro-, ethyl ester	Pentanoic acid, nonafluoro-, ethyl ester (9CI); Valeric acid, nonafluoro-, ethyl ester (8CI); Ethyl 2,2,3,3,4,4,5,5,5-nonafluoropentanoate; Ethyl nonafluoropentanoate; Ethyl nonafluorovalerate; Ethyl perfluoropentanoate	C7 H5 F9 O2	CCOC(=O)C(F)(F)C(F)(F)C(F)(F)C(F)(F)F		102	perfluoroalkyl carboxylic acids (PFCAs), their salts and esters	1	4	1	1	0	0	NA	0		CCOC(=O)C(F)(F)C(F)(F)C(F)(F)C(F)(F)F	CCO	C(=O)C(F)(F)C(F)(F)C(F)(F)C(F)(F)F	1	C(=O)			424-36-2	CCOC(=O)C(F)(F)C(F)(F)C(F)(F)C(F)(F)F	JBEYNXOZKKQLOH-UHFFFAOYSA-N	Organic compounds	Organohalogen compounds	Alkyl halides	Alkyl fluorides	Perfluoroalkyl carboxylic acid and derivatives	This compound belongs to the class of organic compounds known as perfluoroalkyl carboxylic acid and derivatives. These are organic compounds containing an alkyl chain attached to the C-alpha of a carboxylic acid group (or a derivative thereof), where all hydrogens of the alkyl chain are replaced by fluorine atoms.	Aliphatic acyclic compounds	SMILES			424-36-2	CCOC(=O)CCCC	ICMAFTSLXCXHRK-UHFFFAOYSA-N	Organic compounds	Lipids and lipid-like molecules	Fatty Acyls	Fatty acid esters	Fatty acid esters	This compound belongs to the class of organic compounds known as fatty acid esters. These are carboxylic ester derivatives of a fatty acid.	Aliphatic acyclic compounds	SMILES
959	424-18-0	Hexanoic acid, 2,2,3,3,4,4,5,5,6,6,6-undecafluoro-, methyl ester	Hexanoic acid, undecafluoro-, methyl ester (8CI,9CI); Methyl perfluorohexanoate; Methyl undecafluorohexanoate	C7 H3 F11 O2	COC(=O)C(F)(F)C(F)(F)C(F)(F)C(F)(F)C(F)(F)F		102	perfluoroalkyl carboxylic acids (PFCAs), their salts and esters	1	5	1	1	0	0	NA	0		COC(=O)C(F)(F)C(F)(F)C(F)(F)C(F)(F)C(F)(F)F	CO	C(=O)C(F)(F)C(F)(F)C(F)(F)C(F)(F)C(F)(F)F	1	C(=O)			424-18-0	COC(=O)C(F)(F)C(F)(F)C(F)(F)C(F)(F)C(F)(F)F	NJXMLQHJFDKLKL-UHFFFAOYSA-N	Organic compounds	Organohalogen compounds	Alkyl halides	Alkyl fluorides	Perfluoroalkyl carboxylic acid and derivatives	This compound belongs to the class of organic compounds known as perfluoroalkyl carboxylic acid and derivatives. These are organic compounds containing an alkyl chain attached to the C-alpha of a carboxylic acid group (or a derivative thereof), where all hydrogens of the alkyl chain are replaced by fluorine atoms.	Aliphatic acyclic compounds	SMILES			424-18-0	COC(=O)CCCCC	NUKZAGXMHTUAFE-UHFFFAOYSA-N	Organic compounds	Lipids and lipid-like molecules	Fatty Acyls	Fatty acid esters	Fatty acid methyl esters	This compound belongs to the class of organic compounds known as fatty acid methyl esters. These are compounds containing a fatty acid that is esterified with a methyl group. They have the general structure RC(=O)OR', where R=fatty aliphatic tail or organyl group and R'=methyl group.	Aliphatic acyclic compounds	SMILES
1037	335-76-2	Decanoic acid, 2,2,3,3,4,4,5,5,6,6,7,7,8,8,9,9,10,10,10-nonadecafluoro-	Decanoic acid, nonadecafluoro- (6CI,7CI,8CI,9CI); 2,2,3,3,4,4,5,5,6,6,7,7,8,8,9,9,10,10,10-Nonadecafluorodecanoic acid; Nonadecafluoro-n-decanoic acid; Nonadecafluorodecanoic acid; PFDA; Perfluoro-1-nonanecarboxylic acid; Perfluoro-n-decanoic acid; Perfluorocapric acid; Perfluorodecanoic acid	C10 H F19 O2	OC(=O)C(F)(F)C(F)(F)C(F)(F)C(F)(F)C(F)(F)C(F)(F)C(F)(F)C(F)(F)C(F)(F)F		102	perfluoroalkyl carboxylic acids (PFCAs), their salts and esters	1	9	1	0	0	0	NA	0		OC(=O)C(F)(F)C(F)(F)C(F)(F)C(F)(F)C(F)(F)C(F)(F)C(F)(F)C(F)(F)C(F)(F)F	O	C(=O)C(F)(F)C(F)(F)C(F)(F)C(F)(F)C(F)(F)C(F)(F)C(F)(F)C(F)(F)C(F)(F)F	1	C(=O)			335-76-2	OC(=O)C(F)(F)C(F)(F)C(F)(F)C(F)(F)C(F)(F)C(F)(F)C(F)(F)C(F)(F)C(F)(F)F	PCIUEQPBYFRTEM-UHFFFAOYSA-N	Organic compounds	Organohalogen compounds	Alkyl halides	Alkyl fluorides	Perfluoroalkyl carboxylic acid and derivatives	This compound belongs to the class of organic compounds known as perfluoroalkyl carboxylic acid and derivatives. These are organic compounds containing an alkyl chain attached to the C-alpha of a carboxylic acid group (or a derivative thereof), where all hydrogens of the alkyl chain are replaced by fluorine atoms.	Aliphatic acyclic compounds	SMILES			335-76-2	OC(=O)CCCCCCCCC	GHVNFZFCNZKVNT-UHFFFAOYSA-N	Organic compounds	Lipids and lipid-like molecules	Fatty Acyls	Fatty acids and conjugates	Medium-chain fatty acids	This compound belongs to the class of organic compounds known as medium-chain fatty acids. These are fatty acids with an aliphatic tail that contains between 4 and 12 carbon atoms.	Aliphatic acyclic compounds	SMILES
1039	2058-94-8	Undecanoic acid, 2,2,3,3,4,4,5,5,6,6,7,7,8,8,9,9,10,10,11,11,11-heneicosafluoro-	Undecanoic acid, heneicosafluoro- (6CI,8CI,9CI); 2,2,3,3,4,4,5,5,6,6,7,7,8,8,9,9,10,10,11,11,11-Heneicosafluoroundecanoic acid; 2,2,3,3,4,4,5,5,6,6,7,7,8,8,9,9,10,10,10-Heneicosafluoroundecanoic acid; Heneicosafluoroundecanoic acid; PFUnA; PFUnDA; Perfluoroundecanoic acid; Perfluoroundecylic acid	C11 H F21 O2	OC(=O)C(F)(F)C(F)(F)C(F)(F)C(F)(F)C(F)(F)C(F)(F)C(F)(F)C(F)(F)C(F)(F)C(F)(F)F	110961-38-1	102	perfluoroalkyl carboxylic acids (PFCAs), their salts and esters	1	10	1	1	0	0	NA	0		OC(=O)C(F)(F)C(F)(F)C(F)(F)C(F)(F)C(F)(F)C(F)(F)C(F)(F)C(F)(F)C(F)(F)C(F)(F)F	O	C(=O)C(F)(F)C(F)(F)C(F)(F)C(F)(F)C(F)(F)C(F)(F)C(F)(F)C(F)(F)C(F)(F)C(F)(F)F	1	C(=O)			2058-94-8	OC(=O)C(F)(F)C(F)(F)C(F)(F)C(F)(F)C(F)(F)C(F)(F)C(F)(F)C(F)(F)C(F)(F)C(F)(F)F	SIDINRCMMRKXGQ-UHFFFAOYSA-N	Organic compounds	Organohalogen compounds	Alkyl halides	Alkyl fluorides	Perfluoroalkyl carboxylic acid and derivatives	This compound belongs to the class of organic compounds known as perfluoroalkyl carboxylic acid and derivatives. These are organic compounds containing an alkyl chain attached to the C-alpha of a carboxylic acid group (or a derivative thereof), where all hydrogens of the alkyl chain are replaced by fluorine atoms.	Aliphatic acyclic compounds	SMILES			2058-94-8	OC(=O)CCCCCCCCCC	ZDPHROOEEOARMN-UHFFFAOYSA-N	Organic compounds	Lipids and lipid-like molecules	Fatty Acyls	Fatty acids and conjugates	Medium-chain fatty acids	This compound belongs to the class of organic compounds known as medium-chain fatty acids. These are fatty acids with an aliphatic tail that contains between 4 and 12 carbon atoms.	Aliphatic acyclic compounds	SMILES
1089	424-37-3	Pentanoic acid, 2,2,3,3,4,4,5,5,5-nonafluoro-, ethenyl ester	Pentanoic acid, nonafluoro-, ethenyl ester (9CI); Valeric acid, nonafluoro-, vinyl ester (6CI,8CI); Vinyl perfluorovalerate	C7 H3 F9 O2	FC(F)(F)C(F)(F)C(F)(F)C(F)(F)C(=O)OC=C		102	perfluoroalkyl carboxylic acids (PFCAs), their salts and esters	1	4	1	1	0	0	NA	0		FC(F)(F)C(F)(F)C(F)(F)C(F)(F)C(=O)OC=C	OC=C	FC(F)(F)C(F)(F)C(F)(F)C(F)(F)C=O	1	C(=O)			424-37-3	FC(F)(F)C(F)(F)C(F)(F)C(F)(F)C(=O)OC=C	ABKMQSRPKFUWEH-UHFFFAOYSA-N	Organic compounds	Organohalogen compounds	Alkyl halides	Alkyl fluorides	Perfluoroalkyl carboxylic acid and derivatives	This compound belongs to the class of organic compounds known as perfluoroalkyl carboxylic acid and derivatives. These are organic compounds containing an alkyl chain attached to the C-alpha of a carboxylic acid group (or a derivative thereof), where all hydrogens of the alkyl chain are replaced by fluorine atoms.	Aliphatic acyclic compounds	SMILES			424-37-3	CCCCC(=O)OC=C	BLZSRIYYOIZLJL-UHFFFAOYSA-N	Organic compounds	Lipids and lipid-like molecules	Fatty Acyls	Fatty acid esters	Fatty acid esters	This compound belongs to the class of organic compounds known as fatty acid esters. These are carboxylic ester derivatives of a fatty acid.	Aliphatic acyclic compounds	SMILES
1100	14312-89-1	Heptanoic acid, 2,2,3,3,4,4,5,5,6,6,7,7,7-tridecafluoro-, methyl ester	Heptanoic acid, tridecafluoro-, methyl ester (8CI,9CI); Methyl perfluoroheptanoate; Methyl tridecafluoroheptanoate; Tridecafluoroheptanoic acid methyl ester	C8 H3 F13 O2	COC(=O)C(F)(F)C(F)(F)C(F)(F)C(F)(F)C(F)(F)C(F)(F)F		102	perfluoroalkyl carboxylic acids (PFCAs), their salts and esters	1	6	1	1	0	0	NA	0		COC(=O)C(F)(F)C(F)(F)C(F)(F)C(F)(F)C(F)(F)C(F)(F)F	CO	C(=O)C(F)(F)C(F)(F)C(F)(F)C(F)(F)C(F)(F)C(F)(F)F	1	C(=O)			14312-89-1	COC(=O)C(F)(F)C(F)(F)C(F)(F)C(F)(F)C(F)(F)C(F)(F)F	JHROQORAJUWVCD-UHFFFAOYSA-N	Organic compounds	Organohalogen compounds	Alkyl halides	Alkyl fluorides	Perfluoroalkyl carboxylic acid and derivatives	This compound belongs to the class of organic compounds known as perfluoroalkyl carboxylic acid and derivatives. These are organic compounds containing an alkyl chain attached to the C-alpha of a carboxylic acid group (or a derivative thereof), where all hydrogens of the alkyl chain are replaced by fluorine atoms.	Aliphatic acyclic compounds	SMILES			14312-89-1	COC(=O)CCCCCC	XNCNNDVCAUWAIT-UHFFFAOYSA-N	Organic compounds	Lipids and lipid-like molecules	Fatty Acyls	Fatty acid esters	Fatty acid methyl esters	This compound belongs to the class of organic compounds known as fatty acid methyl esters. These are compounds containing a fatty acid that is esterified with a methyl group. They have the general structure RC(=O)OR', where R=fatty aliphatic tail or organyl group and R'=methyl group.	Aliphatic acyclic compounds	SMILES
1120	307-55-1	Dodecanoic acid, 2,2,3,3,4,4,5,5,6,6,7,7,8,8,9,9,10,10,11,11,12,12,12-tricosafluoro-	Dodecanoic acid, tricosafluoro- (6CI,7CI,8CI,9CI); 2,2,3,3,4,4,5,5,6,6,7,7,8,8,9,9,10,10,11,11,12,12,12-Tricosafluorododecanoic acid; 2,2,3,3,4,4,5,5,6,6,7,7,8,8,9,9,10,10,11,11,11-Tricosafluorododecanoic acid; PFDoDA; Perfluorododecanoic acid; Perfluorolauric acid	C12 H F23 O2	OC(=O)C(F)(F)C(F)(F)C(F)(F)C(F)(F)C(F)(F)C(F)(F)C(F)(F)C(F)(F)C(F)(F)C(F)(F)C(F)(F)F		102	perfluoroalkyl carboxylic acids (PFCAs), their salts and esters	1	11	1	1	0	0	NA	0		OC(=O)C(F)(F)C(F)(F)C(F)(F)C(F)(F)C(F)(F)C(F)(F)C(F)(F)C(F)(F)C(F)(F)C(F)(F)C(F)(F)F	O	C(=O)C(F)(F)C(F)(F)C(F)(F)C(F)(F)C(F)(F)C(F)(F)C(F)(F)C(F)(F)C(F)(F)C(F)(F)C(F)(F)F	1	C(=O)			307-55-1	OC(=O)C(F)(F)C(F)(F)C(F)(F)C(F)(F)C(F)(F)C(F)(F)C(F)(F)C(F)(F)C(F)(F)C(F)(F)C(F)(F)F	CXGONMQFMIYUJR-UHFFFAOYSA-N	Organic compounds	Organohalogen compounds	Alkyl halides	Alkyl fluorides	Perfluoroalkyl carboxylic acid and derivatives	This compound belongs to the class of organic compounds known as perfluoroalkyl carboxylic acid and derivatives. These are organic compounds containing an alkyl chain attached to the C-alpha of a carboxylic acid group (or a derivative thereof), where all hydrogens of the alkyl chain are replaced by fluorine atoms.	Aliphatic acyclic compounds	SMILES			307-55-1	OC(=O)CCCCCCCCCCC	POULHZVOKOAJMA-UHFFFAOYSA-N	Organic compounds	Lipids and lipid-like molecules	Fatty Acyls	Fatty acids and conjugates	Medium-chain fatty acids	This compound belongs to the class of organic compounds known as medium-chain fatty acids. These are fatty acids with an aliphatic tail that contains between 4 and 12 carbon atoms.	Aliphatic acyclic compounds	SMILES
1145	376-27-2	Octanoic acid, 2,2,3,3,4,4,5,5,6,6,7,7,8,8,8-pentadecafluoro-, methyl ester	Octanoic acid, pentadecafluoro-, methyl ester (6CI,7CI,8CI,9CI); Methyl pentadecafluorooctanoate; Methyl perfluorooctanoate; P 1453; Perfluorooctanoic acid methyl ester	C9 H3 F15 O2	COC(=O)C(F)(F)C(F)(F)C(F)(F)C(F)(F)C(F)(F)C(F)(F)C(F)(F)F		102	perfluoroalkyl carboxylic acids (PFCAs), their salts and esters	1	7	1	1	0	0	NA	0		COC(=O)C(F)(F)C(F)(F)C(F)(F)C(F)(F)C(F)(F)C(F)(F)C(F)(F)F	CO	C(=O)C(F)(F)C(F)(F)C(F)(F)C(F)(F)C(F)(F)C(F)(F)C(F)(F)F	1	C(=O)			376-27-2	COC(=O)C(F)(F)C(F)(F)C(F)(F)C(F)(F)C(F)(F)C(F)(F)C(F)(F)F	XOCNYZFAMHDXJK-UHFFFAOYSA-N	Organic compounds	Organohalogen compounds	Alkyl halides	Alkyl fluorides	Perfluoroalkyl carboxylic acid and derivatives	This compound belongs to the class of organic compounds known as perfluoroalkyl carboxylic acid and derivatives. These are organic compounds containing an alkyl chain attached to the C-alpha of a carboxylic acid group (or a derivative thereof), where all hydrogens of the alkyl chain are replaced by fluorine atoms.	Aliphatic acyclic compounds	SMILES			376-27-2	COC(=O)CCCCCCC	JGHZJRVDZXSNKQ-UHFFFAOYSA-N	Organic compounds	Lipids and lipid-like molecules	Fatty Acyls	Fatty acid esters	Fatty acid methyl esters	This compound belongs to the class of organic compounds known as fatty acid methyl esters. These are compounds containing a fatty acid that is esterified with a methyl group. They have the general structure RC(=O)OR', where R=fatty aliphatic tail or organyl group and R'=methyl group.	Aliphatic acyclic compounds	SMILES
1149	72629-94-8	Tridecanoic acid, 2,2,3,3,4,4,5,5,6,6,7,7,8,8,9,9,10,10,11,11,12,12,13,13,13-pentacosafluoro-	Tridecanoic acid, pentacosafluoro- (9CI); 2,2,3,3,4,4,5,5,6,6,7,7,8,8,9,9,10,10,11,11,12,12,13,13,13-Pentacosafluorotridecanoic acid; PFTriDA; Perfluoro-n-tridecanoic acid; Perfluorotridecanoic acid	C13 H F25 O2	OC(=O)C(F)(F)C(F)(F)C(F)(F)C(F)(F)C(F)(F)C(F)(F)C(F)(F)C(F)(F)C(F)(F)C(F)(F)C(F)(F)C(F)(F)F		102	perfluoroalkyl carboxylic acids (PFCAs), their salts and esters	1	12	1	0	0	0	NA	0		OC(=O)C(F)(F)C(F)(F)C(F)(F)C(F)(F)C(F)(F)C(F)(F)C(F)(F)C(F)(F)C(F)(F)C(F)(F)C(F)(F)C(F)(F)F	O	C(=O)C(F)(F)C(F)(F)C(F)(F)C(F)(F)C(F)(F)C(F)(F)C(F)(F)C(F)(F)C(F)(F)C(F)(F)C(F)(F)C(F)(F)F	1	C(=O)			72629-94-8	OC(=O)C(F)(F)C(F)(F)C(F)(F)C(F)(F)C(F)(F)C(F)(F)C(F)(F)C(F)(F)C(F)(F)C(F)(F)C(F)(F)C(F)(F)F	LVDGGZAZAYHXEY-UHFFFAOYSA-N	Organic compounds	Lipids and lipid-like molecules	Fatty Acyls	Fatty acids and conjugates	Long-chain fatty acids	This compound belongs to the class of organic compounds known as long-chain fatty acids. These are fatty acids with an aliphatic tail that contains between 13 and 21 carbon atoms.	Aliphatic acyclic compounds	SMILES			72629-94-8	OC(=O)CCCCCCCCCCCC	SZHOJFHSIKHZHA-UHFFFAOYSA-N	Organic compounds	Lipids and lipid-like molecules	Fatty Acyls	Fatty acids and conjugates	Long-chain fatty acids	This compound belongs to the class of organic compounds known as long-chain fatty acids. These are fatty acids with an aliphatic tail that contains between 13 and 21 carbon atoms.	Aliphatic acyclic compounds	SMILES
1209	0376-06-07	Tetradecanoic acid, 2,2,3,3,4,4,5,5,6,6,7,7,8,8,9,9,10,10,11,11,12,12,13,13,14,14,14-heptacosafluoro-	Tetradecanoic acid, heptacosafluoro- (9CI); 2,2,3,3,4,4,5,5,6,6,7,7,8,8,9,9,10,10,11,11,12,12,13,13,14,14,14-Heptacosafluorotetradecanoic acid; PFTeDA; Perfluoro-n-tetradecanoic acid; Perfluoromyristic acid; Perfluorotetradecanecarboxylic acid; Perfluorotetradecanoic acid	C14 H F27 O2	OC(=O)C(F)(F)C(F)(F)C(F)(F)C(F)(F)C(F)(F)C(F)(F)C(F)(F)C(F)(F)C(F)(F)C(F)(F)C(F)(F)C(F)(F)C(F)(F)F		102	perfluoroalkyl carboxylic acids (PFCAs), their salts and esters	1	13	1	0	0	0	NA	0		OC(=O)C(F)(F)C(F)(F)C(F)(F)C(F)(F)C(F)(F)C(F)(F)C(F)(F)C(F)(F)C(F)(F)C(F)(F)C(F)(F)C(F)(F)C(F)(F)F	O	C(=O)C(F)(F)C(F)(F)C(F)(F)C(F)(F)C(F)(F)C(F)(F)C(F)(F)C(F)(F)C(F)(F)C(F)(F)C(F)(F)C(F)(F)C(F)(F)F	1	C(=O)			0376-06-07	OC(=O)C(F)(F)C(F)(F)C(F)(F)C(F)(F)C(F)(F)C(F)(F)C(F)(F)C(F)(F)C(F)(F)C(F)(F)C(F)(F)C(F)(F)C(F)(F)F	RUDINRUXCKIXAJ-UHFFFAOYSA-N	Organic compounds	Lipids and lipid-like molecules	Fatty Acyls	Fatty acids and conjugates	Long-chain fatty acids	This compound belongs to the class of organic compounds known as long-chain fatty acids. These are fatty acids with an aliphatic tail that contains between 13 and 21 carbon atoms.	Aliphatic acyclic compounds	SMILES			0376-06-07	OC(=O)CCCCCCCCCCCCC	TUNFSRHWOTWDNC-UHFFFAOYSA-N	Organic compounds	Lipids and lipid-like molecules	Fatty Acyls	Fatty acids and conjugates	Long-chain fatty acids	This compound belongs to the class of organic compounds known as long-chain fatty acids. These are fatty acids with an aliphatic tail that contains between 13 and 21 carbon atoms.	Aliphatic acyclic compounds	SMILES
1210	423-54-1	Octanamide, 2,2,3,3,4,4,5,5,6,6,7,7,8,8,8-pentadecafluoro-	2,2,3,3,4,4,5,5,6,6,7,7,8,8,8-Pentadecafluorooctanamide; Pentadecafluorooctanamide; Perfluorocaprylamide; Perfluorooctanamide; Perfluorooctanoic acid amide; Perfluorooctylamide	C8 H2 F15 N O	NC(=O)C(F)(F)C(F)(F)C(F)(F)C(F)(F)C(F)(F)C(F)(F)C(F)(F)F		103.01	perfluoroalkyl carbonyl amides / amido ethanols and other alcohols	1	7	1	1	0	0	NA	0		NC(=O)C(F)(F)C(F)(F)C(F)(F)C(F)(F)C(F)(F)C(F)(F)C(F)(F)F	[NH2]	C(=O)C(F)(F)C(F)(F)C(F)(F)C(F)(F)C(F)(F)C(F)(F)C(F)(F)F	1	C(=O)			423-54-1	NC(=O)C(F)(F)C(F)(F)C(F)(F)C(F)(F)C(F)(F)C(F)(F)C(F)(F)F	UGMUDSKJLAUMTC-UHFFFAOYSA-N	Organic compounds	Organohalogen compounds	Alkyl halides	Alkyl fluorides	Perfluoroalkyl carboxylic acid and derivatives	This compound belongs to the class of organic compounds known as perfluoroalkyl carboxylic acid and derivatives. These are organic compounds containing an alkyl chain attached to the C-alpha of a carboxylic acid group (or a derivative thereof), where all hydrogens of the alkyl chain are replaced by fluorine atoms.	Aliphatic acyclic compounds	SMILES			423-54-1	NC(=O)CCCCCCC	LTHCSWBWNVGEFE-UHFFFAOYSA-N	Organic compounds	Lipids and lipid-like molecules	Fatty Acyls	Fatty amides	Fatty amides	This compound belongs to the class of organic compounds known as fatty amides. These are carboxylic acid amide derivatives of fatty acids, that are formed from a fatty acid and an amine.	Aliphatic acyclic compounds	SMILES
1239	41430-70-0	Heptanoic acid, 2,2,3,3,4,4,5,5,6,6,7,7,7-tridecafluoro-, ethyl ester	Heptanoic acid, tridecafluoro-, ethyl ester (9CI); Ethyl perfluoroheptanoate; Ethyl tridecafluoroheptanoate	C9 H5 F13 O2	CCOC(=O)C(F)(F)C(F)(F)C(F)(F)C(F)(F)C(F)(F)C(F)(F)F		102	perfluoroalkyl carboxylic acids (PFCAs), their salts and esters	1	6	1	1	0	0	NA	0		CCOC(=O)C(F)(F)C(F)(F)C(F)(F)C(F)(F)C(F)(F)C(F)(F)F	CCO	C(=O)C(F)(F)C(F)(F)C(F)(F)C(F)(F)C(F)(F)C(F)(F)F	1	C(=O)			41430-70-0	CCOC(=O)C(F)(F)C(F)(F)C(F)(F)C(F)(F)C(F)(F)C(F)(F)F	ZESCSNXJAROIJS-UHFFFAOYSA-N	Organic compounds	Organohalogen compounds	Alkyl halides	Alkyl fluorides	Perfluoroalkyl carboxylic acid and derivatives	This compound belongs to the class of organic compounds known as perfluoroalkyl carboxylic acid and derivatives. These are organic compounds containing an alkyl chain attached to the C-alpha of a carboxylic acid group (or a derivative thereof), where all hydrogens of the alkyl chain are replaced by fluorine atoms.	Aliphatic acyclic compounds	SMILES			41430-70-0	CCOC(=O)CCCCCC	TVQGDYNRXLTQAP-UHFFFAOYSA-N	Organic compounds	Lipids and lipid-like molecules	Fatty Acyls	Fatty acid esters	Fatty acid esters	This compound belongs to the class of organic compounds known as fatty acid esters. These are carboxylic ester derivatives of a fatty acid.	Aliphatic acyclic compounds	SMILES
1241	53296-64-3	Butanamide, 2,2,3,3,4,4,4-heptafluoro-N-methyl-N-(trimethylsilyl)-	2,2,3,3,4,4,4-Heptafluoro-N-methyl-N-(trimethylsilyl)butanamide; N-Methyl-N-(trimethylsilyl)heptafluorobutyramide	C8 H12 F7 N O Si	CN(C(=O)C(F)(F)C(F)(F)C(F)(F)F)[Si](C)(C)C		103.02	perfluoroalkyl carbonyl silanes	1	3	1	1	0	0	NA	0		CN(C(=O)C(F)(F)C(F)(F)C(F)(F)F)[Si](C)(C)C	CN[Si](C)(C)C	C(=O)C(F)(F)C(F)(F)C(F)(F)F	1	C(=O)			53296-64-3	CN(C(=O)C(F)(F)C(F)(F)C(F)(F)F)[Si](C)(C)C	CMXKINNDZCNCEI-UHFFFAOYSA-N	Organic compounds	Organohalogen compounds	Alkyl halides	Alkyl fluorides	Perfluoroalkyl carboxylic acid and derivatives	This compound belongs to the class of organic compounds known as perfluoroalkyl carboxylic acid and derivatives. These are organic compounds containing an alkyl chain attached to the C-alpha of a carboxylic acid group (or a derivative thereof), where all hydrogens of the alkyl chain are replaced by fluorine atoms.	Aliphatic acyclic compounds	SMILES			53296-64-3	CN(C(=O)CCC)[Si](C)(C)C	JUBOYGWGKIWCHK-UHFFFAOYSA-N	Organic compounds	Organometallic compounds	Organometalloid compounds	Organosilicon compounds	Trialkylheterosilanes	This compound belongs to the class of organic compounds known as trialkylheterosilanes. These are organoheterosilanes, bearing a silicon atom linked to three alkyl groups and one heteroatom.	Aliphatic acyclic compounds	SMILES
1264	67905-19-5	Hexadecanoic acid, 2,2,3,3,4,4,5,5,6,6,7,7,8,8,9,9,10,10,11,11,12,12,13,13,14,14,15,15,16,16,16-hentriacontafluoro-	Hexadecanoic acid, hentriacontafluoro- (9CI); 2,2,3,3,4,4,5,5,6,6,7,7,8,8,9,9,10,10,11,11,12,12,13,13,14,14,15,15,16,16,16-Hentriacontafluorohexadecanoic acid; PFHxDA; Perfluorohexadecanoic acid	C16 H F31 O2	OC(=O)C(F)(F)C(F)(F)C(F)(F)C(F)(F)C(F)(F)C(F)(F)C(F)(F)C(F)(F)C(F)(F)C(F)(F)C(F)(F)C(F)(F)C(F)(F)C(F)(F)C(F)(F)F		102	perfluoroalkyl carboxylic acids (PFCAs), their salts and esters	1	15	1	0	0	0	NA	0		OC(=O)C(F)(F)C(F)(F)C(F)(F)C(F)(F)C(F)(F)C(F)(F)C(F)(F)C(F)(F)C(F)(F)C(F)(F)C(F)(F)C(F)(F)C(F)(F)C(F)(F)C(F)(F)F	O	C(=O)C(F)(F)C(F)(F)C(F)(F)C(F)(F)C(F)(F)C(F)(F)C(F)(F)C(F)(F)C(F)(F)C(F)(F)C(F)(F)C(F)(F)C(F)(F)C(F)(F)C(F)(F)F	1	C(=O)			67905-19-5	OC(=O)C(F)(F)C(F)(F)C(F)(F)C(F)(F)C(F)(F)C(F)(F)C(F)(F)C(F)(F)C(F)(F)C(F)(F)C(F)(F)C(F)(F)C(F)(F)C(F)(F)C(F)(F)F	OJMBMWRMTMHMSZ-UHFFFAOYSA-N	Organic compounds	Lipids and lipid-like molecules	Fatty Acyls	Fatty acids and conjugates	Long-chain fatty acids	This compound belongs to the class of organic compounds known as long-chain fatty acids. These are fatty acids with an aliphatic tail that contains between 13 and 21 carbon atoms.	Aliphatic acyclic compounds	SMILES			67905-19-5	OC(=O)CCCCCCCCCCCCCCC	IPCSVZSSVZVIGE-UHFFFAOYSA-N	Organic compounds	Lipids and lipid-like molecules	Fatty Acyls	Fatty acids and conjugates	Long-chain fatty acids	This compound belongs to the class of organic compounds known as long-chain fatty acids. These are fatty acids with an aliphatic tail that contains between 13 and 21 carbon atoms.	Aliphatic acyclic compounds	SMILES
1304	3108-24-5	Octanoic acid, 2,2,3,3,4,4,5,5,6,6,7,7,8,8,8-pentadecafluoro-, ethyl ester	Octanoic acid, pentadecafluoro-, ethyl ester (6CI,7CI,8CI,9CI); Ethyl pentadecafluorooctanoate; Ethyl perfluorooctanoate	C10 H5 F15 O2	CCOC(=O)C(F)(F)C(F)(F)C(F)(F)C(F)(F)C(F)(F)C(F)(F)C(F)(F)F	173441-60-6	102	perfluoroalkyl carboxylic acids (PFCAs), their salts and esters	1	7	1	1	0	0	NA	0		CCOC(=O)C(F)(F)C(F)(F)C(F)(F)C(F)(F)C(F)(F)C(F)(F)C(F)(F)F	CCO	C(=O)C(F)(F)C(F)(F)C(F)(F)C(F)(F)C(F)(F)C(F)(F)C(F)(F)F	1	C(=O)			3108-24-5	CCOC(=O)C(F)(F)C(F)(F)C(F)(F)C(F)(F)C(F)(F)C(F)(F)C(F)(F)F	JTOFFHFAQBLPTM-UHFFFAOYSA-N	Organic compounds	Organohalogen compounds	Alkyl halides	Alkyl fluorides	Perfluoroalkyl carboxylic acid and derivatives	This compound belongs to the class of organic compounds known as perfluoroalkyl carboxylic acid and derivatives. These are organic compounds containing an alkyl chain attached to the C-alpha of a carboxylic acid group (or a derivative thereof), where all hydrogens of the alkyl chain are replaced by fluorine atoms.	Aliphatic acyclic compounds	SMILES			3108-24-5	CCOC(=O)CCCCCCC	YYZUSRORWSJGET-UHFFFAOYSA-N	Organic compounds	Lipids and lipid-like molecules	Fatty Acyls	Fatty acid esters	Fatty acid esters	This compound belongs to the class of organic compounds known as fatty acid esters. These are carboxylic ester derivatives of a fatty acid.	Aliphatic acyclic compounds	SMILES
1327	#VALUE!	Octadecanoic acid, 2,2,3,3,4,4,5,5,6,6,7,7,8,8,9,9,10,10,11,11,12,12,13,13,14,14,15,15,16,16,17,17,18,18,18-pentatriacontafluoro-	Octadecanoic acid, pentatriacontafluoro- (8CI,9CI); 2,2,3,3,4,4,5,5,6,6,7,7,8,8,9,9,10,10,11,11,12,12,13,13,14,14,15,15,16,16,17,17,18,18,18-Pentatriacontafluorooctadecanoic acid; Perfluorooctadecanoic acid; Perfluorostearic acid	C18 H F35 O2	OC(=O)C(F)(F)C(F)(F)C(F)(F)C(F)(F)C(F)(F)C(F)(F)C(F)(F)C(F)(F)C(F)(F)C(F)(F)C(F)(F)C(F)(F)C(F)(F)C(F)(F)C(F)(F)C(F)(F)C(F)(F)F		102	perfluoroalkyl carboxylic acids (PFCAs), their salts and esters	1	17	1	0	0	0	NA	0		OC(=O)C(F)(F)C(F)(F)C(F)(F)C(F)(F)C(F)(F)C(F)(F)C(F)(F)C(F)(F)C(F)(F)C(F)(F)C(F)(F)C(F)(F)C(F)(F)C(F)(F)C(F)(F)C(F)(F)C(F)(F)F	O	C(=O)C(F)(F)C(F)(F)C(F)(F)C(F)(F)C(F)(F)C(F)(F)C(F)(F)C(F)(F)C(F)(F)C(F)(F)C(F)(F)C(F)(F)C(F)(F)C(F)(F)C(F)(F)C(F)(F)C(F)(F)F	1	C(=O)			#VALUE!	OC(=O)C(F)(F)C(F)(F)C(F)(F)C(F)(F)C(F)(F)C(F)(F)C(F)(F)C(F)(F)C(F)(F)C(F)(F)C(F)(F)C(F)(F)C(F)(F)C(F)(F)C(F)(F)C(F)(F)C(F)(F)F	ZTSDOGSKTICNPQ-UHFFFAOYSA-N	Organic compounds	Lipids and lipid-like molecules	Fatty Acyls	Fatty acids and conjugates	Long-chain fatty acids	This compound belongs to the class of organic compounds known as long-chain fatty acids. These are fatty acids with an aliphatic tail that contains between 13 and 21 carbon atoms.	Aliphatic acyclic compounds	SMILES			#VALUE!	OC(=O)CCCCCCCCCCCCCCCCC	QIQXTHQIDYTFRH-UHFFFAOYSA-N	Organic compounds	Lipids and lipid-like molecules	Fatty Acyls	Fatty acids and conjugates	Long-chain fatty acids	This compound belongs to the class of organic compounds known as long-chain fatty acids. These are fatty acids with an aliphatic tail that contains between 13 and 21 carbon atoms.	Aliphatic acyclic compounds	SMILES
1393	30377-52-7	Nonanoic acid, 2,2,3,3,4,4,5,5,6,6,7,7,8,8,9,9,9-heptadecafluoro-, ethyl ester	Nonanoic acid, heptadecafluoro-, ethyl ester (8CI,9CI); Ethyl perfluorononan-1-oate; Ethyl perfluorononanoate; Ethyl perfluoropelargonate	C11 H5 F17 O2	CCOC(=O)C(F)(F)C(F)(F)C(F)(F)C(F)(F)C(F)(F)C(F)(F)C(F)(F)C(F)(F)F		102	perfluoroalkyl carboxylic acids (PFCAs), their salts and esters	1	8	1	1	0	0	NA	0		CCOC(=O)C(F)(F)C(F)(F)C(F)(F)C(F)(F)C(F)(F)C(F)(F)C(F)(F)C(F)(F)F	CCO	C(=O)C(F)(F)C(F)(F)C(F)(F)C(F)(F)C(F)(F)C(F)(F)C(F)(F)C(F)(F)F	1	C(=O)			30377-52-7	CCOC(=O)C(F)(F)C(F)(F)C(F)(F)C(F)(F)C(F)(F)C(F)(F)C(F)(F)C(F)(F)F	DRLDSHOYANTUND-UHFFFAOYSA-N	Organic compounds	Organohalogen compounds	Alkyl halides	Alkyl fluorides	Perfluorooctanoic acid and derivatives	This compound belongs to the class of organic compounds known as perfluorooctanoic acid and derivatives. These are organic compounds containing an octyl chain attached to the C-alpha of a carboxylic acid group (or a derivative thereof), where all hydrogens of the octyl chain are replaced by fluorine atoms.	Aliphatic acyclic compounds	SMILES			30377-52-7	CCOC(=O)CCCCCCCC	BYEVBITUADOIGY-UHFFFAOYSA-N	Organic compounds	Lipids and lipid-like molecules	Fatty Acyls	Fatty acid esters	Fatty acid esters	This compound belongs to the class of organic compounds known as fatty acid esters. These are carboxylic ester derivatives of a fatty acid.	Aliphatic acyclic compounds	SMILES
1692	73980-71-9	Butanamide, 2,2,3,3,4,4,4-heptafluoro-N-(2,2,3,3,4,4,4-heptafluoro-1-oxobutyl)-N-methyl-	2,2,3,3,4,4,4-Heptafluoro-N-(2,2,3,3,4,4,4-heptafluoro-1-oxobutyl)-N-methylbutanamide	C9 H3 F14 N O2	CN(C(=O)C(F)(F)C(F)(F)C(F)(F)F)C(=O)C(F)(F)C(F)(F)C(F)(F)F		103.01	perfluoroalkyl carbonyl amides / amido ethanols and other alcohols	1	3	1	1	0	0	NA	0		CN(C(=O)C(F)(F)C(F)(F)C(F)(F)F)C(=O)C(F)(F)C(F)(F)C(F)(F)F	CN	C(=O)C(F)(F)C(F)(F)C(F)(F)F	2	C(=O)		5.2	73980-71-9	CN(C(=O)C(F)(F)C(F)(F)C(F)(F)F)C(=O)C(F)(F)C(F)(F)C(F)(F)F	BCQYNSPESDDJBZ-UHFFFAOYSA-N	Organic compounds	Organohalogen compounds	Alkyl halides	Alkyl fluorides	Perfluoroalkyl carboxylic acid and derivatives	This compound belongs to the class of organic compounds known as perfluoroalkyl carboxylic acid and derivatives. These are organic compounds containing an alkyl chain attached to the C-alpha of a carboxylic acid group (or a derivative thereof), where all hydrogens of the alkyl chain are replaced by fluorine atoms.	Aliphatic acyclic compounds	SMILES			73980-71-9	CN(C(=O)CCC)C(=O)CCC	YXKZMSSWNYFEQC-UHFFFAOYSA-N	Organic compounds	Lipids and lipid-like molecules	Fatty Acyls	Fatty amides	N-acyl amines	This compound belongs to the class of organic compounds known as n-acyl amines. These are compounds containing a fatty acid moiety linked to an amine group through an ester linkage.	Aliphatic acyclic compounds	SMILES
1733	33496-48-9	Octanoic acid, 2,2,3,3,4,4,5,5,6,6,7,7,8,8,8-pentadecafluoro-, 1,1'-anhydride	Octanoic acid, pentadecafluoro-, anhydride (8CI,9CI); Perfluorocaprylic acid anhydride; Perfluoroheptanoic anhydride; Perfluorooctanoic anhydride	C16 F30 O3	FC(F)(F)C(F)(F)C(F)(F)C(F)(F)C(F)(F)C(F)(F)C(F)(F)C(=O)OC(=O)C(F)(F)C(F)(F)C(F)(F)C(F)(F)C(F)(F)C(F)(F)C(F)(F)F		102	perfluoroalkyl carboxylic acids (PFCAs), their salts and esters	1	7	1	1	0	0	NA	0		FC(F)(F)C(F)(F)C(F)(F)C(F)(F)C(F)(F)C(F)(F)C(F)(F)C(=O)OC(=O)C(F)(F)C(F)(F)C(F)(F)C(F)(F)C(F)(F)C(F)(F)C(F)(F)F	O	FC(F)(F)C(F)(F)C(F)(F)C(F)(F)C(F)(F)C(F)(F)C(F)(F)C=O	2	C(=O)		5.3	33496-48-9	FC(F)(F)C(F)(F)C(F)(F)C(F)(F)C(F)(F)C(F)(F)C(F)(F)C(=O)OC(=O)C(F)(F)C(F)(F)C(F)(F)C(F)(F)C(F)(F)C(F)(F)C(F)(F)F	NBEDTLDKOMPAQK-UHFFFAOYSA-N	Organic compounds	Organohalogen compounds	Alkyl halides	Alkyl fluorides	Perfluoroalkyl carboxylic acid and derivatives	This compound belongs to the class of organic compounds known as perfluoroalkyl carboxylic acid and derivatives. These are organic compounds containing an alkyl chain attached to the C-alpha of a carboxylic acid group (or a derivative thereof), where all hydrogens of the alkyl chain are replaced by fluorine atoms.	Aliphatic acyclic compounds	SMILES			33496-48-9	CCCCCCCC(=O)OC(=O)CCCCCCC	RAFYDKXYXRZODZ-UHFFFAOYSA-N	Organic compounds	Organic acids and derivatives	Carboxylic acids and derivatives	Dicarboxylic acids and derivatives	Dicarboxylic acids and derivatives	This compound belongs to the class of organic compounds known as dicarboxylic acids and derivatives. These are organic compounds containing exactly two carboxylic acid groups.	Aliphatic acyclic compounds	SMILES
1735	0560-02-01	Butanamide, 2,2,3,3,4,4,4-heptafluoro-N-(phenylmethyl)-	Butyramide, N-benzyl-2,2,3,3,4,4,4-heptafluoro- (7CI,8CI); 2,2,3,3,4,4,4-Heptafluoro-N-(phenylmethyl)butanamide	C11 H8 F7 N O	FC(F)(F)C(F)(F)C(F)(F)C(=O)NCC1=CC=CC=C1		103	other perfluoroalkyl carbonyl-based nonpolymers	1	3	1	1	0	0	NA	0		FC(F)(F)C(F)(F)C(F)(F)C(=O)NCC1=CC=CC=C1	NCC1=CC=CC=C1	FC(F)(F)C(F)(F)C(F)(F)C=O	1	C(=O)			0560-02-01	FC(F)(F)C(F)(F)C(F)(F)C(=O)NCC1=CC=CC=C1	JGYHLDPCXQPJCA-UHFFFAOYSA-N	Organic compounds	Organohalogen compounds	Alkyl halides	Alkyl fluorides	Perfluoroalkyl carboxylic acid and derivatives	This compound belongs to the class of organic compounds known as perfluoroalkyl carboxylic acid and derivatives. These are organic compounds containing an alkyl chain attached to the C-alpha of a carboxylic acid group (or a derivative thereof), where all hydrogens of the alkyl chain are replaced by fluorine atoms.	Aromatic homomonocyclic compounds	SMILES			0560-02-01	CCCC(=O)NCC1=CC=CC=C1	OHWQEBAVEDXXDM-UHFFFAOYSA-N	Organic compounds	Lipids and lipid-like molecules	Fatty Acyls	Fatty amides	N-acyl amines	This compound belongs to the class of organic compounds known as n-acyl amines. These are compounds containing a fatty acid moiety linked to an amine group through an ester linkage.	Aromatic homomonocyclic compounds	SMILES
1793	85938-56-3	Octanamide, N-(3-aminopropyl)-2,2,3,3,4,4,5,5,6,6,7,7,8,8,8-pentadecafluoro-	N-(3-Aminopropyl)-2,2,3,3,4,4,5,5,6,6,7,7,8,8,8-pentadecafluorooctanamide	C11 H9 F15 N2 O	NCCCNC(=O)C(F)(F)C(F)(F)C(F)(F)C(F)(F)C(F)(F)C(F)(F)C(F)(F)F		103	other perfluoroalkyl carbonyl-based nonpolymers	1	7	1	1	0	0	NA	0		NCCCNC(=O)C(F)(F)C(F)(F)C(F)(F)C(F)(F)C(F)(F)C(F)(F)C(F)(F)F	NCCCN	C(=O)C(F)(F)C(F)(F)C(F)(F)C(F)(F)C(F)(F)C(F)(F)C(F)(F)F	1	C(=O)			85938-56-3	NCCCNC(=O)C(F)(F)C(F)(F)C(F)(F)C(F)(F)C(F)(F)C(F)(F)C(F)(F)F	YIQVOMZDSOSAQY-UHFFFAOYSA-N	Organic compounds	Organohalogen compounds	Alkyl halides	Alkyl fluorides	Perfluoroalkyl carboxylic acid and derivatives	This compound belongs to the class of organic compounds known as perfluoroalkyl carboxylic acid and derivatives. These are organic compounds containing an alkyl chain attached to the C-alpha of a carboxylic acid group (or a derivative thereof), where all hydrogens of the alkyl chain are replaced by fluorine atoms.	Aliphatic acyclic compounds	SMILES			85938-56-3	NCCCNC(=O)CCCCCCC	AZGZCTUTODQNFW-UHFFFAOYSA-N	Organic compounds	Lipids and lipid-like molecules	Fatty Acyls	Fatty amides	N-acyl amines	This compound belongs to the class of organic compounds known as n-acyl amines. These are compounds containing a fatty acid moiety linked to an amine group through an ester linkage.	Aliphatic acyclic compounds	SMILES
1852	32477-35-3	1-Butanone, 2,2,3,3,4,4,4-heptafluoro-1-(1H-imidazol-1-yl)-	1H-Imidazole, 1-(2,2,3,3,4,4,4-heptafluoro-1-oxobutyl)- (9CI); Imidazole, 1-(heptafluorobutyryl)- (8CI); 2,2,3,3,4,4,4-Heptafluoro-1-(1H-imidazol-1-yl)-1-butanone; 1-(Heptafluorobutyryl)imidazole; N-(Heptafluorobutyryl)imidazole; NSC 151966	C7 H3 F7 N2 O	FC(F)(F)C(F)(F)C(F)(F)C(=O)N1C=CN=C1		103	other perfluoroalkyl carbonyl-based nonpolymers	1	3	1	1	0	0	NA	0		FC(F)(F)C(F)(F)C(F)(F)C(=O)N1C=CN=C1	N1C=CN=C1	FC(F)(F)C(F)(F)C(F)(F)C=O	1	C(=O)			32477-35-3	FC(F)(F)C(F)(F)C(F)(F)C(=O)N1C=CN=C1	MSYHGYDAVLDKCE-UHFFFAOYSA-N	Organic compounds	Organoheterocyclic compounds	Azoles	Imidazoles	Carbonylimidazoles	This compound belongs to the class of organic compounds known as carbonylimidazoles. These are substituted imidazoles in which the imidazole ring bears a carbonyl group.	Aromatic heteromonocyclic compounds	SMILES			32477-35-3	CCCC(=O)N1C=CN=C1	FRBJFEASMICLGH-UHFFFAOYSA-N	Organic compounds	Organoheterocyclic compounds	Azoles	Imidazoles	Carbonylimidazoles	This compound belongs to the class of organic compounds known as carbonylimidazoles. These are substituted imidazoles in which the imidazole ring bears a carbonyl group.	Aromatic heteromonocyclic compounds	SMILES
1937	106376-38-9	Butanamide, N-(3,5-dichlorophenyl)-2,2,3,3,4,4,4-heptafluoro-	N-(3,5-Dichlorophenyl)-2,2,3,3,4,4,4-heptafluorobutanamide	C10 H4 Cl2 F7 N O	[H]N(C(=O)C(F)(F)C(F)(F)C(F)(F)F)C1=CC(Cl)=CC(Cl)=C1		103	other perfluoroalkyl carbonyl-based nonpolymers	1	3	1	1	0	0	NA	0		[H]N(C(=O)C(F)(F)C(F)(F)C(F)(F)F)C1=CC(Cl)=CC(Cl)=C1	NC1=CC(Cl)=CC(Cl)=C1	C(=O)C(F)(F)C(F)(F)C(F)(F)F	1	C(=O)			106376-38-9	[H]N(C(=O)C(F)(F)C(F)(F)C(F)(F)F)C1=CC(Cl)=CC(Cl)=C1	WGNKYUWDFZMCGQ-UHFFFAOYSA-N	Organic compounds	Organohalogen compounds	Alkyl halides	Alkyl fluorides	Perfluoroalkyl carboxylic acid and derivatives	This compound belongs to the class of organic compounds known as perfluoroalkyl carboxylic acid and derivatives. These are organic compounds containing an alkyl chain attached to the C-alpha of a carboxylic acid group (or a derivative thereof), where all hydrogens of the alkyl chain are replaced by fluorine atoms.	Aromatic homomonocyclic compounds	SMILES			106376-38-9	[H]N(C(=O)CCC)C1=CC(Cl)=CC(Cl)=C1	HSAWYNCBHGCAHO-UHFFFAOYSA-N	Organic compounds	Benzenoids	Benzene and substituted derivatives	Anilides	Anilides	This compound belongs to the class of organic compounds known as anilides. These are organic heterocyclic compounds derived from oxoacids RkE(=O)l(OH)m (l not 0) by replacing an OH group by the NHPh group or derivative formed by ring substitution.	Aromatic homomonocyclic compounds	SMILES
1940	230295-06-4	Octanoic acid, 2,2,3,3,4,4,5,5,6,6,7,7,8,8,8-pentadecafluoro-, (4-ethenylphenyl)methyl ester	Octanoic acid, pentadecafluoro-, (4-ethenylphenyl)methyl ester (9CI); 4-Vinylbenzyl perfluorooctanoate	C17 H9 F15 O2	FC(F)(F)C(F)(F)C(F)(F)C(F)(F)C(F)(F)C(F)(F)C(F)(F)C(=O)OCC1=CC=C(C=C)C=C1		102	perfluoroalkyl carboxylic acids (PFCAs), their salts and esters	1	7	1	1	0	0	NA	0		FC(F)(F)C(F)(F)C(F)(F)C(F)(F)C(F)(F)C(F)(F)C(F)(F)C(=O)OCC1=CC=C(C=C)C=C1	OCC1=CC=C(C=C)C=C1	FC(F)(F)C(F)(F)C(F)(F)C(F)(F)C(F)(F)C(F)(F)C(F)(F)C=O	1	C(=O)			230295-06-4	FC(F)(F)C(F)(F)C(F)(F)C(F)(F)C(F)(F)C(F)(F)C(F)(F)C(=O)OCC1=CC=C(C=C)C=C1	YWVKVBIQFSFMMV-UHFFFAOYSA-N	Organic compounds	Benzenoids	Benzene and substituted derivatives	Benzyloxycarbonyls	Benzyloxycarbonyls	This compound belongs to the class of organic compounds known as benzyloxycarbonyls. These are organic compounds containing a carbonyl group substituted with a benzyloxyl group.	Aromatic homomonocyclic compounds	SMILES			230295-06-4	CCCCCCCC(=O)OCC1=CC=C(C=C)C=C1	NQVRIRZFZJVKIS-UHFFFAOYSA-N	Organic compounds	Benzenoids	Benzene and substituted derivatives	Benzyloxycarbonyls	Benzyloxycarbonyls	This compound belongs to the class of organic compounds known as benzyloxycarbonyls. These are organic compounds containing a carbonyl group substituted with a benzyloxyl group.	Aromatic homomonocyclic compounds	SMILES
2003	106376-37-8	Butanamide, N-(3,4-dichlorophenyl)-2,2,3,3,4,4,4-heptafluoro-	N-(3,4-Dichlorophenyl)-2,2,3,3,4,4,4-heptafluorobutanamide	C10 H4 Cl2 F7 N O	[H]N(C(=O)C(F)(F)C(F)(F)C(F)(F)F)C1=CC(Cl)=C(Cl)C=C1		103	other perfluoroalkyl carbonyl-based nonpolymers	1	3	1	1	0	0	NA	0		[H]N(C(=O)C(F)(F)C(F)(F)C(F)(F)F)C1=CC(Cl)=C(Cl)C=C1	NC1=CC(Cl)=C(Cl)C=C1	C(=O)C(F)(F)C(F)(F)C(F)(F)F	1	C(=O)			106376-37-8	[H]N(C(=O)C(F)(F)C(F)(F)C(F)(F)F)C1=CC(Cl)=C(Cl)C=C1	INMDAGXEYRBPRG-UHFFFAOYSA-N	Organic compounds	Organohalogen compounds	Alkyl halides	Alkyl fluorides	Perfluoroalkyl carboxylic acid and derivatives	This compound belongs to the class of organic compounds known as perfluoroalkyl carboxylic acid and derivatives. These are organic compounds containing an alkyl chain attached to the C-alpha of a carboxylic acid group (or a derivative thereof), where all hydrogens of the alkyl chain are replaced by fluorine atoms.	Aromatic homomonocyclic compounds	SMILES			106376-37-8	[H]N(C(=O)CCC)C1=CC(Cl)=C(Cl)C=C1	NNIIRGXUFKHOKI-UHFFFAOYSA-N	Organic compounds	Benzenoids	Benzene and substituted derivatives	Anilides	Anilides	This compound belongs to the class of organic compounds known as anilides. These are organic heterocyclic compounds derived from oxoacids RkE(=O)l(OH)m (l not 0) by replacing an OH group by the NHPh group or derivative formed by ring substitution.	Aromatic homomonocyclic compounds	SMILES
2029	41358-63-8	Octanamide, N-[3-[bis(2-hydroxyethyl)amino]propyl]-2,2,3,3,4,4,5,5,6,6,7,7,8,8,8-pentadecafluoro-	N-[3-[Bis(2-hydroxyethyl)amino]propyl]-2,2,3,3,4,4,5,5,6,6,7,7,8,8,8-pentadecafluorooctanamide	C15 H17 F15 N2 O3	OCCN(CCO)CCCNC(=O)C(F)(F)C(F)(F)C(F)(F)C(F)(F)C(F)(F)C(F)(F)C(F)(F)F		103	other perfluoroalkyl carbonyl-based nonpolymers	1	7	1	1	0	0	NA	0		OCCN(CCO)CCCNC(=O)C(F)(F)C(F)(F)C(F)(F)C(F)(F)C(F)(F)C(F)(F)C(F)(F)F	OCCN(CCO)CCCN	C(=O)C(F)(F)C(F)(F)C(F)(F)C(F)(F)C(F)(F)C(F)(F)C(F)(F)F	1	C(=O)			41358-63-8	OCCN(CCO)CCCNC(=O)C(F)(F)C(F)(F)C(F)(F)C(F)(F)C(F)(F)C(F)(F)C(F)(F)F	PJFLHAJVWSCWMB-UHFFFAOYSA-N	Organic compounds	Organohalogen compounds	Alkyl halides	Alkyl fluorides	Perfluoroalkyl carboxylic acid and derivatives	This compound belongs to the class of organic compounds known as perfluoroalkyl carboxylic acid and derivatives. These are organic compounds containing an alkyl chain attached to the C-alpha of a carboxylic acid group (or a derivative thereof), where all hydrogens of the alkyl chain are replaced by fluorine atoms.	Aliphatic acyclic compounds	SMILES			41358-63-8	OCCN(CCO)CCCNC(=O)CCCCCCC	FWRCYUSMVOILIE-UHFFFAOYSA-N	Organic compounds	Lipids and lipid-like molecules	Fatty Acyls	Fatty amides	N-acyl amines	This compound belongs to the class of organic compounds known as n-acyl amines. These are compounds containing a fatty acid moiety linked to an amine group through an ester linkage.	Aliphatic acyclic compounds	SMILES
2181	39186-68-0	1-Propanaminium, N-(2-carboxyethyl)-N,N-bis(2-hydroxyethyl)-3-[(2,2,3,3,4,4,5,5,6,6,7,7,8,8,8-pentadecafluoro-1-oxooctyl)amino]-, inner salt	1-Propanaminium, N-(2-carboxyethyl)-N,N-bis(2-hydroxyethyl)-3-[(2,2,3,3,4,4,5,5,6,6,7,7,8,8,8-pentadecafluoro-1-oxooctyl)amino]-, hydroxide, inner salt; [3-(Perfluorooctanamido)propyl]bis(2-hydroxyethyl)(2-carboxyethyl)ammonium hydroxide inner salt	C18 H21 F15 N2 O5	[OH-].OCC[N+](CCO)(CCCNC(=O)C(F)(F)C(F)(F)C(F)(F)C(F)(F)C(F)(F)C(F)(F)C(F)(F)F)CCC(O)=O		103.02	perfluoroalkyl carbonyl silanes	1	7	1	1	0	0	NA	0		[OH-].OCC[N+](CCO)(CCCNC(=O)C(F)(F)C(F)(F)C(F)(F)C(F)(F)C(F)(F)C(F)(F)C(F)(F)F)CCC(O)=O	OCC[N+](CCO)(CCCN)CCC(O)=O	C(=O)C(F)(F)C(F)(F)C(F)(F)C(F)(F)C(F)(F)C(F)(F)C(F)(F)F	1	C(=O)			39186-68-0	[OH-].OCC[N+](CCO)(CCCNC(=O)C(F)(F)C(F)(F)C(F)(F)C(F)(F)C(F)(F)C(F)(F)C(F)(F)F)CCC(O)=O	QWXFQEDOSLXNLW-UHFFFAOYSA-N	Organic compounds	Organohalogen compounds	Alkyl halides	Alkyl fluorides	Perfluoroalkyl carboxylic acid and derivatives	This compound belongs to the class of organic compounds known as perfluoroalkyl carboxylic acid and derivatives. These are organic compounds containing an alkyl chain attached to the C-alpha of a carboxylic acid group (or a derivative thereof), where all hydrogens of the alkyl chain are replaced by fluorine atoms.	Aliphatic acyclic compounds	SMILES			39186-68-0	[OH-].OCC[N+](CCO)(CCCNC(=O)CCCCCCC)CCC(O)=O	JWAMHFPJHLFXCB-UHFFFAOYSA-N	Organic compounds	Lipids and lipid-like molecules	Fatty Acyls	Fatty amides	N-acyl amines	This compound belongs to the class of organic compounds known as n-acyl amines. These are compounds containing a fatty acid moiety linked to an amine group through an ester linkage.	Aliphatic acyclic compounds	SMILES
2387	#VALUE!	Benzenesulfonyl chloride, 3,4-bis[(2,2,3,3,4,4,5,5,6,6,7,7,8,8,8-pentadecafluoro-1-oxooctyl)amino]-	Benzenesulfonyl chloride, 3,4-bis(2,2,3,3,4,4,5,5,6,6,7,7,8,8,8-pentadecafluorooctanamido)- (8CI); 3,4-Bis[(2,2,3,3,4,4,5,5,6,6,7,7,8,8,8-pentadecafluoro-1-oxooctyl)amino]benzenesulfonyl chloride	C22 H5 Cl F30 N2 O4 S	FC(F)(F)C(F)(F)C(F)(F)C(F)(F)C(F)(F)C(F)(F)C(F)(F)C(=O)NC1=C(NC(=O)C(F)(F)C(F)(F)C(F)(F)C(F)(F)C(F)(F)C(F)(F)C(F)(F)F)C=C(C=C1)S(Cl)(=O)=O		103	other perfluoroalkyl carbonyl-based nonpolymers	1	7	1	1	0	0	NA	0		FC(F)(F)C(F)(F)C(F)(F)C(F)(F)C(F)(F)C(F)(F)C(F)(F)C(=O)NC1=C(NC(=O)C(F)(F)C(F)(F)C(F)(F)C(F)(F)C(F)(F)C(F)(F)C(F)(F)F)C=C(C=C1)S(Cl)(=O)=O	NC1=C(N)C=C(C=C1)S(Cl)(=O)=O	FC(F)(F)C(F)(F)C(F)(F)C(F)(F)C(F)(F)C(F)(F)C(F)(F)C=O	2	C(=O)		5.3	#VALUE!	FC(F)(F)C(F)(F)C(F)(F)C(F)(F)C(F)(F)C(F)(F)C(F)(F)C(=O)NC1=C(NC(=O)C(F)(F)C(F)(F)C(F)(F)C(F)(F)C(F)(F)C(F)(F)C(F)(F)F)C=C(C=C1)S(Cl)(=O)=O	PEVCFUGKAIGEMQ-UHFFFAOYSA-N	Organic compounds	Benzenoids	Benzene and substituted derivatives	Benzenesulfonyl compounds	Benzenesulfonyl chlorides	This compound belongs to the class of organic compounds known as benzenesulfonyl chlorides. These are aromatic compounds containing a benzenesulfonyl group, where the sulfonyl moiety is singly boned to a chloride atom.	Aromatic homomonocyclic compounds	SMILES			#VALUE!	CCCCCCCC(=O)NC1=C(NC(=O)CCCCCCC)C=C(C=C1)S(Cl)(=O)=O	AQXLSXBBKWWVNJ-UHFFFAOYSA-N	Organic compounds	Benzenoids	Benzene and substituted derivatives	Benzenesulfonyl compounds	Benzenesulfonyl chlorides	This compound belongs to the class of organic compounds known as benzenesulfonyl chlorides. These are aromatic compounds containing a benzenesulfonyl group, where the sulfonyl moiety is singly boned to a chloride atom.	Aromatic homomonocyclic compounds	SMILES
2402	0346-10-1	Butanamide, N-[4-[[2-[2,4-bis(1,1-dimethylpropyl)phenoxy]-1-oxobutyl]amino]-2-hydroxyphenyl]-2,2,3,3,4,4,4-heptafluoro-	Butyranilide, 4'-[2-(2,4-di-tert-pentylphenoxy)butyramido]-2,2,3,3,4,4,4-heptafluoro-2'-hydroxy- (6CI,8CI); N-[4-[[2-[2,4-Bis(1,1-dimethylpropyl)phenoxy]-1-oxobutyl]amino]-2-hydroxyphenyl]-2,2,3,3,4,4,4-heptafluorobutanamide	C30 H37 F7 N2 O4	[H]N(C(=O)C(CC)OC1=C(C=C(C=C1)C(C)(C)CC)C(C)(C)CC)C1=CC(O)=C(C=C1)N([H])C(=O)C(F)(F)C(F)(F)C(F)(F)F	92997-70-1	103	other perfluoroalkyl carbonyl-based nonpolymers	1	3	1	1	0	0	NA	0		[H]N(C(=O)C(CC)OC1=C(C=C(C=C1)C(C)(C)CC)C(C)(C)CC)C1=CC(O)=C(C=C1)N([H])C(=O)C(F)(F)C(F)(F)C(F)(F)F	N(C(=O)C(CC)OC1=C(C=C(C=C1)C(C)(C)CC)C(C)(C)CC)C2=CC(O)=C(C=C2)N	C(=O)C(F)(F)C(F)(F)C(F)(F)F	1	C(=O)			0346-10-1	[H]N(C(=O)C(CC)OC1=C(C=C(C=C1)C(C)(C)CC)C(C)(C)CC)C1=CC(O)=C(C=C1)N([H])C(=O)C(F)(F)C(F)(F)C(F)(F)F	GJVFPXBDZTWODC-UHFFFAOYSA-N	Organic compounds	Organohalogen compounds	Alkyl halides	Alkyl fluorides	Perfluoroalkyl carboxylic acid and derivatives	This compound belongs to the class of organic compounds known as perfluoroalkyl carboxylic acid and derivatives. These are organic compounds containing an alkyl chain attached to the C-alpha of a carboxylic acid group (or a derivative thereof), where all hydrogens of the alkyl chain are replaced by fluorine atoms.	Aromatic homomonocyclic compounds	SMILES			0346-10-1	[H]N(C(=O)C(CC)OC1=C(C=C(C=C1)C(C)(C)CC)C(C)(C)CC)C1=CC(O)=C(C=C1)N([H])C(=O)CCC	UMBANTSYNFRXRC-UHFFFAOYSA-N	Organic compounds	Benzenoids	Benzene and substituted derivatives	Anilides	Anilides	This compound belongs to the class of organic compounds known as anilides. These are organic heterocyclic compounds derived from oxoacids RkE(=O)l(OH)m (l not 0) by replacing an OH group by the NHPh group or derivative formed by ring substitution.	Aromatic homomonocyclic compounds	SMILES
2485	0680-05-07	Propanoic acid, 2,3,3,3-tetrafluoro-2-(trifluoromethyl)-, methyl ester	Propionic acid, 2,3,3,3-tetrafluoro-2-(trifluoromethyl)-, methyl ester (7CI,8CI); Methyl perfluoroisobutyrate	C5 H3 F7 O2	COC(=O)C(F)(C(F)(F)F)C(F)(F)F		102	perfluoroalkyl carboxylic acids (PFCAs), their salts and esters	1	3	0	1	0	0	NA	0		COC(=O)C(F)(C(F)(F)F)C(F)(F)F	NA	NA	NA	NA	No splittable bond found for the input molecule COC(=O)C(F)(C(F)(F)F)C(F)(F)F	1	0680-05-07	COC(=O)C(F)(C(F)(F)F)C(F)(F)F	CGMUKBZUGMXXEF-UHFFFAOYSA-N	Organic compounds	Organic acids and derivatives	Carboxylic acids and derivatives	Carboxylic acid derivatives	Methyl esters	This compound belongs to the class of organic compounds known as methyl esters. These are organic compounds containing a carboxyl group that is esterified with a methyl group. They have the general structure RC(=O)OR', where R=H or organyl group and R'=methyl group.	Aliphatic acyclic compounds	SMILES			0680-05-07	COC(=O)C(C)C	BHIWKHZACMWKOJ-UHFFFAOYSA-N	Organic compounds	Organic acids and derivatives	Carboxylic acids and derivatives	Carboxylic acid derivatives	Methyl esters	This compound belongs to the class of organic compounds known as methyl esters. These are organic compounds containing a carboxyl group that is esterified with a methyl group. They have the general structure RC(=O)OR', where R=H or organyl group and R'=methyl group.	Aliphatic acyclic compounds	SMILES
2538	18017-31-7	Hexanoyl fluoride, 2,2,3,3,4,4,5,6,6,6-decafluoro-5-(trifluoromethyl)-	Hexanoyl fluoride, decafluoro-5-(trifluoromethyl)- (8CI); 2,2,3,3,4,4,5,6,6,6-Decafluoro-5-(trifluoromethyl)hexanoyl fluoride	C7 F14 O	FC(=O)C(F)(F)C(F)(F)C(F)(F)C(F)(C(F)(F)F)C(F)(F)F		101	perfluoroalkyl carbonyl halides	1	7	0	1	0	0	NA	0		FC(=O)C(F)(F)C(F)(F)C(F)(F)C(F)(C(F)(F)F)C(F)(F)F	NA	NA	NA	NA	No splittable bond found for the input molecule FC(=O)C(F)(F)C(F)(F)C(F)(F)C(F)(C(F)(F)F)C(F)(F)F	4	18017-31-7	FC(=O)C(F)(F)C(F)(F)C(F)(F)C(F)(C(F)(F)F)C(F)(F)F	JQXGQDNUXYODIT-UHFFFAOYSA-N	Organic compounds	Organohalogen compounds	Acyl halides	Acyl fluorides	Acyl fluorides	This compound belongs to the class of organic compounds known as acyl fluorides. These are organic compounds containing the functional group -CO-F.	Aliphatic acyclic compounds	SMILES			18017-31-7	FC(=O)CCCC(C)C	PCWOCXMGGILGEB-UHFFFAOYSA-N	Organic compounds	Organohalogen compounds	Acyl halides	Acyl fluorides	Acyl fluorides	This compound belongs to the class of organic compounds known as acyl fluorides. These are organic compounds containing the functional group -CO-F.	Aliphatic acyclic compounds	SMILES
2552	15899-29-3	Hexanoic acid, 2,2,3,3,4,4,5,6,6,6-decafluoro-5-(trifluoromethyl)-	Hexanoic acid, decafluoro-5-(trifluoromethyl)- (8CI); 2,2,3,3,4,4,5,6,6,6-Decafluoro-5-(trifluoromethyl)hexanoic acid	C7 H F13 O2	OC(=O)C(F)(F)C(F)(F)C(F)(F)C(F)(C(F)(F)F)C(F)(F)F		102	perfluoroalkyl carboxylic acids (PFCAs), their salts and esters	1	6	0	0	0	0	NA	0		OC(=O)C(F)(F)C(F)(F)C(F)(F)C(F)(C(F)(F)F)C(F)(F)F	O	C(=O)C(F)(F)C(F)(F)C(F)(F)C(F)(C(F)(F)F)C(F)(F)F	1	C(=O)			15899-29-3	OC(=O)C(F)(F)C(F)(F)C(F)(F)C(F)(C(F)(F)F)C(F)(F)F	QTDMKZFMFHHSLJ-UHFFFAOYSA-N	Organic compounds	Lipids and lipid-like molecules	Fatty Acyls	Fatty acids and conjugates	Medium-chain fatty acids	This compound belongs to the class of organic compounds known as medium-chain fatty acids. These are fatty acids with an aliphatic tail that contains between 4 and 12 carbon atoms.	Aliphatic acyclic compounds	SMILES			15899-29-3	OC(=O)CCCC(C)C	MHPUGCYGQWGLJL-UHFFFAOYSA-N	Organic compounds	Lipids and lipid-like molecules	Fatty Acyls	Fatty acids and conjugates	Medium-chain fatty acids	This compound belongs to the class of organic compounds known as medium-chain fatty acids. These are fatty acids with an aliphatic tail that contains between 4 and 12 carbon atoms.	Aliphatic acyclic compounds	SMILES
2558	15742-62-8	Octanoyl fluoride, 2,2,3,3,4,4,5,5,6,6,7,8,8,8-tetradecafluoro-7-(trifluoromethyl)-	Octanoyl fluoride, tetradecafluoro-7-(trifluoromethyl)- (8CI); 2,2,3,3,4,4,5,5,6,6,7,8,8,8-Tetradecafluoro-7-(trifluoromethyl)octanoyl fluoride	C9 F18 O	FC(=O)C(F)(F)C(F)(F)C(F)(F)C(F)(F)C(F)(F)C(F)(C(F)(F)F)C(F)(F)F		101	perfluoroalkyl carbonyl halides	1	8	0	1	0	0	NA	0		FC(=O)C(F)(F)C(F)(F)C(F)(F)C(F)(F)C(F)(F)C(F)(C(F)(F)F)C(F)(F)F	NA	NA	NA	NA	No splittable bond found for the input molecule FC(=O)C(F)(F)C(F)(F)C(F)(F)C(F)(F)C(F)(F)C(F)(C(F)(F)F)C(F)(F)F	4	15742-62-8	FC(=O)C(F)(F)C(F)(F)C(F)(F)C(F)(F)C(F)(F)C(F)(C(F)(F)F)C(F)(F)F	MTWYDIQAJFAPGH-UHFFFAOYSA-N	Organic compounds	Organohalogen compounds	Acyl halides	Acyl fluorides	Acyl fluorides	This compound belongs to the class of organic compounds known as acyl fluorides. These are organic compounds containing the functional group -CO-F.	Aliphatic acyclic compounds	SMILES			15742-62-8	FC(=O)CCCCCC(C)C	QZNHBBQGKLXFQY-UHFFFAOYSA-N	Organic compounds	Organohalogen compounds	Acyl halides	Acyl fluorides	Acyl fluorides	This compound belongs to the class of organic compounds known as acyl fluorides. These are organic compounds containing the functional group -CO-F.	Aliphatic acyclic compounds	SMILES
2565	15899-31-7	Octanoic acid, 2,2,3,3,4,4,5,5,6,6,7,8,8,8-tetradecafluoro-7-(trifluoromethyl)-	Octanoic acid, tetradecafluoro-7-(trifluoromethyl)- (8CI); 2,2,3,3,4,4,5,5,6,6,7,8,8,8-Tetradecafluoro-7-(trifluoromethyl)octanoic acid; Perfluoro-6-methyl-1-heptanecarboxylic acid; Perfluoroisononanoic acid; i,p-PFNA	C9 H F17 O2	OC(=O)C(F)(F)C(F)(F)C(F)(F)C(F)(F)C(F)(F)C(F)(C(F)(F)F)C(F)(F)F		102	perfluoroalkyl carboxylic acids (PFCAs), their salts and esters	1	8	0	0	0	0	NA	0		OC(=O)C(F)(F)C(F)(F)C(F)(F)C(F)(F)C(F)(F)C(F)(C(F)(F)F)C(F)(F)F	O	C(=O)C(F)(F)C(F)(F)C(F)(F)C(F)(F)C(F)(F)C(F)(C(F)(F)F)C(F)(F)F	1	C(=O)			15899-31-7	OC(=O)C(F)(F)C(F)(F)C(F)(F)C(F)(F)C(F)(F)C(F)(C(F)(F)F)C(F)(F)F	WIXVASFEKZIRFM-UHFFFAOYSA-N	Organic compounds	Lipids and lipid-like molecules	Fatty Acyls	Fatty acids and conjugates	Medium-chain fatty acids	This compound belongs to the class of organic compounds known as medium-chain fatty acids. These are fatty acids with an aliphatic tail that contains between 4 and 12 carbon atoms.	Aliphatic acyclic compounds	SMILES			15899-31-7	OC(=O)CCCCCC(C)C	XZOYHFBNQHPJRQ-UHFFFAOYSA-N	Organic compounds	Lipids and lipid-like molecules	Fatty Acyls	Fatty acids and conjugates	Medium-chain fatty acids	This compound belongs to the class of organic compounds known as medium-chain fatty acids. These are fatty acids with an aliphatic tail that contains between 4 and 12 carbon atoms.	Aliphatic acyclic compounds	SMILES
2574	16486-94-5	Decanoic acid, 2,2,3,3,4,4,5,5,6,6,7,7,8,8,9,10,10,10-octadecafluoro-9-(trifluoromethyl)-	Decanoic acid, octadecafluoro-9-(trifluoromethyl)- (8CI); 2,2,3,3,4,4,5,5,6,6,7,7,8,8,9,10,10,10-Octadecafluoro-9-(trifluoromethyl)decanoic acid	C11 H F21 O2	OC(=O)C(F)(F)C(F)(F)C(F)(F)C(F)(F)C(F)(F)C(F)(F)C(F)(F)C(F)(C(F)(F)F)C(F)(F)F		102	perfluoroalkyl carboxylic acids (PFCAs), their salts and esters	1	10	0	1	0	0	NA	0		OC(=O)C(F)(F)C(F)(F)C(F)(F)C(F)(F)C(F)(F)C(F)(F)C(F)(F)C(F)(C(F)(F)F)C(F)(F)F	O	C(=O)C(F)(F)C(F)(F)C(F)(F)C(F)(F)C(F)(F)C(F)(F)C(F)(F)C(F)(C(F)(F)F)C(F)(F)F	1	C(=O)			16486-94-5	OC(=O)C(F)(F)C(F)(F)C(F)(F)C(F)(F)C(F)(F)C(F)(F)C(F)(F)C(F)(C(F)(F)F)C(F)(F)F	FTUYMACVNWCLNM-UHFFFAOYSA-N	Organic compounds	Lipids and lipid-like molecules	Fatty Acyls	Fatty acids and conjugates	Medium-chain fatty acids	This compound belongs to the class of organic compounds known as medium-chain fatty acids. These are fatty acids with an aliphatic tail that contains between 4 and 12 carbon atoms.	Aliphatic acyclic compounds	SMILES			16486-94-5	OC(=O)CCCCCCCC(C)C	VSAJTRPXXNCHGB-UHFFFAOYSA-N	Organic compounds	Lipids and lipid-like molecules	Fatty Acyls	Fatty acids and conjugates	Medium-chain fatty acids	This compound belongs to the class of organic compounds known as medium-chain fatty acids. These are fatty acids with an aliphatic tail that contains between 4 and 12 carbon atoms.	Aliphatic acyclic compounds	SMILES
2580	172155-07-6	Octanoic acid, 2,2,3,4,4,5,5,6,6,7,8,8,8-tridecafluoro-3,7-bis(trifluoromethyl)-	2,2,3,4,4,5,5,6,6,7,8,8,8-Tridecafluoro-3,7-bis(trifluoromethyl)octanoic acid	C10 H F19 O2	OC(=O)C(F)(F)C(F)(C(F)(F)F)C(F)(F)C(F)(F)C(F)(F)C(F)(C(F)(F)F)C(F)(F)F		102	perfluoroalkyl carboxylic acids (PFCAs), their salts and esters	1	9	0	0	0	0	NA	0		OC(=O)C(F)(F)C(F)(C(F)(F)F)C(F)(F)C(F)(F)C(F)(F)C(F)(C(F)(F)F)C(F)(F)F	O	C(=O)C(F)(F)C(F)(C(F)(F)F)C(F)(F)C(F)(F)C(F)(F)C(F)(C(F)(F)F)C(F)(F)F	1	C(=O)			172155-07-6	OC(=O)C(F)(F)C(F)(C(F)(F)F)C(F)(F)C(F)(F)C(F)(F)C(F)(C(F)(F)F)C(F)(F)F	KZUSAXRVIONPJU-UHFFFAOYSA-N	Organic compounds	Lipids and lipid-like molecules	Fatty Acyls	Fatty acids and conjugates	Medium-chain fatty acids	This compound belongs to the class of organic compounds known as medium-chain fatty acids. These are fatty acids with an aliphatic tail that contains between 4 and 12 carbon atoms.	Aliphatic acyclic compounds	SMILES			172155-07-6	OC(=O)CC(C)CCCC(C)C	DGGBNSXAFVNQJU-UHFFFAOYSA-N	Organic compounds	Lipids and lipid-like molecules	Fatty Acyls	Fatty acids and conjugates	Medium-chain fatty acids	This compound belongs to the class of organic compounds known as medium-chain fatty acids. These are fatty acids with an aliphatic tail that contains between 4 and 12 carbon atoms.	Aliphatic acyclic compounds	SMILES
2592	16486-96-7	Dodecanoic acid, 2,2,3,3,4,4,5,5,6,6,7,7,8,8,9,9,10,10,11,12,12,12-docosafluoro-11-(trifluoromethyl)-	Dodecanoic acid, docosafluoro-11-(trifluoromethyl)- (8CI); 2,2,3,3,4,4,5,5,6,6,7,7,8,8,9,9,10,10,11,12,12,12-Docosafluoro-11-(trifluoromethyl)dodecanoic acid	C13 H F25 O2	OC(=O)C(F)(F)C(F)(F)C(F)(F)C(F)(F)C(F)(F)C(F)(F)C(F)(F)C(F)(F)C(F)(F)C(F)(C(F)(F)F)C(F)(F)F		102	perfluoroalkyl carboxylic acids (PFCAs), their salts and esters	1	12	0	0	0	0	NA	0		OC(=O)C(F)(F)C(F)(F)C(F)(F)C(F)(F)C(F)(F)C(F)(F)C(F)(F)C(F)(F)C(F)(F)C(F)(C(F)(F)F)C(F)(F)F	O	C(=O)C(F)(F)C(F)(F)C(F)(F)C(F)(F)C(F)(F)C(F)(F)C(F)(F)C(F)(F)C(F)(F)C(F)(C(F)(F)F)C(F)(F)F	1	C(=O)			16486-96-7	OC(=O)C(F)(F)C(F)(F)C(F)(F)C(F)(F)C(F)(F)C(F)(F)C(F)(F)C(F)(F)C(F)(F)C(F)(C(F)(F)F)C(F)(F)F	CQXLVCXAWBBSDD-UHFFFAOYSA-N	Organic compounds	Lipids and lipid-like molecules	Fatty Acyls	Fatty acids and conjugates	Medium-chain fatty acids	This compound belongs to the class of organic compounds known as medium-chain fatty acids. These are fatty acids with an aliphatic tail that contains between 4 and 12 carbon atoms.	Aliphatic acyclic compounds	SMILES			16486-96-7	OC(=O)CCCCCCCCCC(C)C	SIOLDWZBFABPJU-UHFFFAOYSA-N	Organic compounds	Lipids and lipid-like molecules	Fatty Acyls	Fatty acids and conjugates	Medium-chain fatty acids	This compound belongs to the class of organic compounds known as medium-chain fatty acids. These are fatty acids with an aliphatic tail that contains between 4 and 12 carbon atoms.	Aliphatic acyclic compounds	SMILES
2600	#VALUE!	Tetradecanoic acid, 2,2,3,3,4,4,5,5,6,6,7,7,8,8,9,9,10,10,11,11,12,12,13,14,14,14-hexacosafluoro-13-(trifluoromethyl)-	Tetradecanoic acid, hexacosafluoro-13-(trifluoromethyl)- (8CI); 2,2,3,3,4,4,5,5,6,6,7,7,8,8,9,9,10,10,11,11,12,12,13,14,14,14-Hexacosafluoro-13-(trifluoromethyl)tetradecanoic acid	C15 H F29 O2	OC(=O)C(F)(F)C(F)(F)C(F)(F)C(F)(F)C(F)(F)C(F)(F)C(F)(F)C(F)(F)C(F)(F)C(F)(F)C(F)(F)C(F)(C(F)(F)F)C(F)(F)F		102	perfluoroalkyl carboxylic acids (PFCAs), their salts and esters	1	14	0	0	0	0	NA	0		OC(=O)C(F)(F)C(F)(F)C(F)(F)C(F)(F)C(F)(F)C(F)(F)C(F)(F)C(F)(F)C(F)(F)C(F)(F)C(F)(F)C(F)(C(F)(F)F)C(F)(F)F	O	C(=O)C(F)(F)C(F)(F)C(F)(F)C(F)(F)C(F)(F)C(F)(F)C(F)(F)C(F)(F)C(F)(F)C(F)(F)C(F)(F)C(F)(C(F)(F)F)C(F)(F)F	1	C(=O)			#VALUE!	OC(=O)C(F)(F)C(F)(F)C(F)(F)C(F)(F)C(F)(F)C(F)(F)C(F)(F)C(F)(F)C(F)(F)C(F)(F)C(F)(F)C(F)(C(F)(F)F)C(F)(F)F	FQAXLPZGSQABMD-UHFFFAOYSA-N	Organic compounds	Lipids and lipid-like molecules	Fatty Acyls	Fatty acids and conjugates	Long-chain fatty acids	This compound belongs to the class of organic compounds known as long-chain fatty acids. These are fatty acids with an aliphatic tail that contains between 13 and 21 carbon atoms.	Aliphatic acyclic compounds	SMILES			#VALUE!	OC(=O)CCCCCCCCCCCC(C)C	ZOCYQVNGROEVLU-UHFFFAOYSA-N	Organic compounds	Lipids and lipid-like molecules	Fatty Acyls	Fatty acids and conjugates	Long-chain fatty acids	This compound belongs to the class of organic compounds known as long-chain fatty acids. These are fatty acids with an aliphatic tail that contains between 13 and 21 carbon atoms.	Aliphatic acyclic compounds	SMILES
3154	15166-06-0	Heptanoic acid, 2,2,3,3,4,4,5,5,6,7,7,7-dodecafluoro-6-(trifluoromethyl)-	Heptanoic acid, dodecafluoro-6-(trifluoromethyl)- (8CI); 2,2,3,3,4,4,5,5,6,7,7,7-Dodecafluoro-6-(trifluoromethyl)heptanoic acid	C8 H F15 O2	OC(=O)C(F)(F)C(F)(F)C(F)(F)C(F)(F)C(F)(C(F)(F)F)C(F)(F)F		102	perfluoroalkyl carboxylic acids (PFCAs), their salts and esters	1	7	0	0	0	0	NA	0		OC(=O)C(F)(F)C(F)(F)C(F)(F)C(F)(F)C(F)(C(F)(F)F)C(F)(F)F	O	C(=O)C(F)(F)C(F)(F)C(F)(F)C(F)(F)C(F)(C(F)(F)F)C(F)(F)F	1	C(=O)			15166-06-0	OC(=O)C(F)(F)C(F)(F)C(F)(F)C(F)(F)C(F)(C(F)(F)F)C(F)(F)F	KPBOPOXIOBBZTR-UHFFFAOYSA-N	Organic compounds	Lipids and lipid-like molecules	Fatty Acyls	Fatty acids and conjugates	Medium-chain fatty acids	This compound belongs to the class of organic compounds known as medium-chain fatty acids. These are fatty acids with an aliphatic tail that contains between 4 and 12 carbon atoms.	Aliphatic acyclic compounds	SMILES			15166-06-0	OC(=O)CCCCC(C)C	OEOIWYCWCDBOPA-UHFFFAOYSA-N	Organic compounds	Lipids and lipid-like molecules	Fatty Acyls	Fatty acids and conjugates	Medium-chain fatty acids	This compound belongs to the class of organic compounds known as medium-chain fatty acids. These are fatty acids with an aliphatic tail that contains between 4 and 12 carbon atoms.	Aliphatic acyclic compounds	SMILES
3188	68025-62-7	Tetradecanoyl fluoride, 2,2,3,3,4,4,5,5,6,6,7,7,8,8,9,9,10,10,11,11,12,12,13,14,14,14-hexacosafluoro-13-(trifluoromethyl)-	2,2,3,3,4,4,5,5,6,6,7,7,8,8,9,9,10,10,11,11,12,12,13,14,14,14-Hexacosafluoro-13-(trifluoromethyl)tetradecanoyl fluoride	C15 F30 O	FC(=O)C(F)(F)C(F)(F)C(F)(F)C(F)(F)C(F)(F)C(F)(F)C(F)(F)C(F)(F)C(F)(F)C(F)(F)C(F)(F)C(F)(C(F)(F)F)C(F)(F)F		101	perfluoroalkyl carbonyl halides	1	14	0	1	0	0	NA	0		FC(=O)C(F)(F)C(F)(F)C(F)(F)C(F)(F)C(F)(F)C(F)(F)C(F)(F)C(F)(F)C(F)(F)C(F)(F)C(F)(F)C(F)(C(F)(F)F)C(F)(F)F	NA	NA	NA	NA	No splittable bond found for the input molecule FC(=O)C(F)(F)C(F)(F)C(F)(F)C(F)(F)C(F)(F)C(F)(F)C(F)(F)C(F)(F)C(F)(F)C(F)(F)C(F)(F)C(F)(C(F)(F)F)C(F)(F)F	4	68025-62-7	FC(=O)C(F)(F)C(F)(F)C(F)(F)C(F)(F)C(F)(F)C(F)(F)C(F)(F)C(F)(F)C(F)(F)C(F)(F)C(F)(F)C(F)(C(F)(F)F)C(F)(F)F	ULTHBMBLJPAOJW-UHFFFAOYSA-N	Organic compounds	Organohalogen compounds	Acyl halides	Acyl fluorides	Acyl fluorides	This compound belongs to the class of organic compounds known as acyl fluorides. These are organic compounds containing the functional group -CO-F.	Aliphatic acyclic compounds	SMILES			68025-62-7	FC(=O)CCCCCCCCCCCC(C)C	PBPFGHZZPPTWLT-UHFFFAOYSA-N	Organic compounds	Organohalogen compounds	Acyl halides	Acyl fluorides	Acyl fluorides	This compound belongs to the class of organic compounds known as acyl fluorides. These are organic compounds containing the functional group -CO-F.	Aliphatic acyclic compounds	SMILES
3190	71356-38-2	Piperazinium, 1-(carboxymethyl)-1-(2-hydroxyethyl)-4-(2,2,3,3,4,4,5,5,6,6,7,7,8,8,9,9,10,10,10-nonadecafluoro-1-oxodecyl)-, inner salt	Piperazinium, 1-(carboxymethyl)-1-(2-hydroxyethyl)-4-(2,2,3,3,4,4,5,5,6,6,7,7,8,8,9,9,10,10,10-nonadecafluoro-1-oxodecyl)-, hydroxide, inner salt	C18 H15 F19 N2 O4	OCC[N+]1(CC([O-])=O)CCN(CC1)C(=O)C(F)(F)C(F)(F)C(F)(F)C(F)(F)C(F)(F)C(F)(F)C(F)(F)C(F)(F)C(F)(F)F		103	other perfluoroalkyl carbonyl-based nonpolymers	1	9	1	1	0	0	NA	0		OCC[N+]1(CC([O-])=O)CCN(CC1)C(=O)C(F)(F)C(F)(F)C(F)(F)C(F)(F)C(F)(F)C(F)(F)C(F)(F)C(F)(F)C(F)(F)F	OCC[N+]1(CC([O-])=O)CCNCC1	C(=O)C(F)(F)C(F)(F)C(F)(F)C(F)(F)C(F)(F)C(F)(F)C(F)(F)C(F)(F)C(F)(F)F	1	C(=O)			71356-38-2	OCC[N+]1(CC([O-])=O)CCN(CC1)C(=O)C(F)(F)C(F)(F)C(F)(F)C(F)(F)C(F)(F)C(F)(F)C(F)(F)C(F)(F)C(F)(F)F	XZONSUWWBDTFJB-UHFFFAOYSA-N	Organic compounds	Organic acids and derivatives	Carboxylic acids and derivatives	Amino acids, peptides, and analogues	Alpha amino acids	This compound belongs to the class of organic compounds known as alpha amino acids. These are amino acids in which the amino group is attached to the carbon atom immediately adjacent to the carboxylate group (alpha carbon).	Aliphatic heteromonocyclic compounds	SMILES			71356-38-2	OCC[N+]1(CC([O-])=O)CCN(CC1)C(=O)CCCCCCCCC	POGKUKXCRXLICM-UHFFFAOYSA-N	Organic compounds	Organic acids and derivatives	Carboxylic acids and derivatives	Amino acids, peptides, and analogues	Alpha amino acids	This compound belongs to the class of organic compounds known as alpha amino acids. These are amino acids in which the amino group is attached to the carbon atom immediately adjacent to the carboxylate group (alpha carbon).	Aliphatic heteromonocyclic compounds	SMILES
3204	76-21-1	Nonanoic acid, 2,2,3,3,4,4,5,5,6,6,7,7,8,8,9,9-hexadecafluoro-	2,2,3,3,4,4,5,5,6,6,7,7,8,8,9,9-Hexadecafluorononanoic acid; 9-H-Hexadecafluorononanoic acid; C 5800	C9 H2 F16 O2	OC(=O)C(F)(F)C(F)(F)C(F)(F)C(F)(F)C(F)(F)C(F)(F)C(F)(F)C(F)F	1413536-18-1	108	1-H perfluoroalkyl carboxylic acids	0	7	1	1	0	0	NA	0	1-H	OC(=O)C(F)(F)C(F)(F)C(F)(F)C(F)(F)C(F)(F)C(F)(F)C(F)(F)C(F)F	O	C(=O)C(F)(F)C(F)(F)C(F)(F)C(F)(F)C(F)(F)C(F)(F)C(F)(F)C(F)F	1	C(=O)		3	76-21-1	OC(=O)C(F)(F)C(F)(F)C(F)(F)C(F)(F)C(F)(F)C(F)(F)C(F)(F)C(F)F	RARQGXBOCXOJPM-UHFFFAOYSA-N	Organic compounds	Lipids and lipid-like molecules	Fatty Acyls	Fatty acids and conjugates	Medium-chain fatty acids	This compound belongs to the class of organic compounds known as medium-chain fatty acids. These are fatty acids with an aliphatic tail that contains between 4 and 12 carbon atoms.	Aliphatic acyclic compounds	SMILES			76-21-1	OC(=O)CCCCCCCC	FBUKVWPVBMHYJY-UHFFFAOYSA-N	Organic compounds	Lipids and lipid-like molecules	Fatty Acyls	Fatty acids and conjugates	Medium-chain fatty acids	This compound belongs to the class of organic compounds known as medium-chain fatty acids. These are fatty acids with an aliphatic tail that contains between 4 and 12 carbon atoms.	Aliphatic acyclic compounds	SMILES
3209	376-34-1	Heptanoic acid, 2,2,3,3,4,4,5,5,6,6,7,7-dodecafluoro-, ammonium salt (1:1)	Heptanoic acid, 2,2,3,3,4,4,5,5,6,6,7,7-dodecafluoro-, NH4 salt (6CI); Heptanoic acid, 2,2,3,3,4,4,5,5,6,6,7,7-dodecafluoro-, ammonium salt (8CI,9CI); Ammonium 7H-dodecafluoroheptanoate	C7 H2 F12 O2 . H3 N	[NH4+].[O-]C(=O)C(F)(F)C(F)(F)C(F)(F)C(F)(F)C(F)(F)C(F)F		108	1-H perfluoroalkyl carboxylic acids	0	5	1	1	0	0	NA	0	1-H	[NH4+].[O-]C(=O)C(F)(F)C(F)(F)C(F)(F)C(F)(F)C(F)(F)C(F)F	[OH-]	C(=O)C(F)(F)C(F)(F)C(F)(F)C(F)(F)C(F)(F)C(F)F	1	C(=O)		3	376-34-1	[NH4+].[O-]C(=O)C(F)(F)C(F)(F)C(F)(F)C(F)(F)C(F)(F)C(F)F	XLOKWMRUDKMDSC-UHFFFAOYSA-N	Organic compounds	Lipids and lipid-like molecules	Fatty Acyls	Fatty acids and conjugates	Medium-chain fatty acids	This compound belongs to the class of organic compounds known as medium-chain fatty acids. These are fatty acids with an aliphatic tail that contains between 4 and 12 carbon atoms.	Aliphatic acyclic compounds	SMILES			376-34-1	[NH4+].[O-]C(=O)CCCCCC	KIWJQNYCQJZQLX-UHFFFAOYSA-N	Organic compounds	Lipids and lipid-like molecules	Fatty Acyls	Fatty acids and conjugates	Medium-chain fatty acids	This compound belongs to the class of organic compounds known as medium-chain fatty acids. These are fatty acids with an aliphatic tail that contains between 4 and 12 carbon atoms.	Aliphatic acyclic compounds	SMILES
3210	376-72-7	Pentanoic acid, 2,2,3,3,4,4,5,5-octafluoro-	Valeric acid, 2,2,3,3,4,4,5,5-octafluoro- (7CI,8CI); 2,2,3,3,4,4,5,5-Octafluoropentanoic acid; 2,2,3,3,4,4,5,5,-Octafluoropentanoic acid; 5-H-Octafluoropentanoic acid; ω-Hydrooctafluorovaleric acid; ω-Hydroperfluorovaleric acid; ω-Monohydrooctafluoropentanoic acid	C5 H2 F8 O2	OC(=O)C(F)(F)C(F)(F)C(F)(F)C(F)F		108	1-H perfluoroalkyl carboxylic acids	0	3	1	1	0	0	NA	0	1-H	OC(=O)C(F)(F)C(F)(F)C(F)(F)C(F)F	O	C(=O)C(F)(F)C(F)(F)C(F)(F)C(F)F	1	C(=O)		3	376-72-7	OC(=O)C(F)(F)C(F)(F)C(F)(F)C(F)F	VGFKXVSMDOKOJZ-UHFFFAOYSA-N	Organic compounds	Lipids and lipid-like molecules	Fatty Acyls	Fatty acids and conjugates	Halogenated fatty acids	This compound belongs to the class of organic compounds known as halogenated fatty acids. These are fatty acids with a chain that carries a halogen atom (Cl,F,I,Br).	Aliphatic acyclic compounds	SMILES			376-72-7	OC(=O)CCCC	NQPDZGIKBAWPEJ-UHFFFAOYSA-N	Organic compounds	Lipids and lipid-like molecules	Fatty Acyls	Fatty acids and conjugates	Straight chain fatty acids	This compound belongs to the class of organic compounds known as straight chain fatty acids. These are fatty acids with a straight aliphatic chain.	Aliphatic acyclic compounds	SMILES
3229	423-95-0	Nonanoyl chloride, 2,2,3,3,4,4,5,5,6,6,7,7,8,8,9,9-hexadecafluoro-	2,2,3,3,4,4,5,5,6,6,7,7,8,8,9,9-Hexadecafluorononanoyl chloride	C9 H Cl F16 O	FC(F)C(F)(F)C(F)(F)C(F)(F)C(F)(F)C(F)(F)C(F)(F)C(F)(F)C(Cl)=O		107	1-H perfluoroalkyl carbonyl halides	0	7	1	1	0	0	NA	0	1-H	FC(F)C(F)(F)C(F)(F)C(F)(F)C(F)(F)C(F)(F)C(F)(F)C(F)(F)C(Cl)=O	Cl	FC(F)C(F)(F)C(F)(F)C(F)(F)C(F)(F)C(F)(F)C(F)(F)C(F)(F)C=O	1	C(=O)		3	423-95-0	FC(F)C(F)(F)C(F)(F)C(F)(F)C(F)(F)C(F)(F)C(F)(F)C(F)(F)C(Cl)=O	RJYUFWDUKZUCSP-UHFFFAOYSA-N	Organic compounds	Organohalogen compounds	Acyl halides	Acyl chlorides	Acyl chlorides	This compound belongs to the class of organic compounds known as acyl chlorides. These are organic compounds containing the functional group -CO-Cl.	Aliphatic acyclic compounds	SMILES			423-95-0	CCCCCCCCC(Cl)=O	NTQYXUJLILNTFH-UHFFFAOYSA-N	Organic compounds	Organohalogen compounds	Acyl halides	Acyl chlorides	Acyl chlorides	This compound belongs to the class of organic compounds known as acyl chlorides. These are organic compounds containing the functional group -CO-Cl.	Aliphatic acyclic compounds	SMILES
3230	1546-95-8	Heptanoic acid, 2,2,3,3,4,4,5,5,6,6,7,7-dodecafluoro-	2,2,3,3,4,4,5,5,6,6,7,7-Dodecafluoroheptanoic acid; 7H-Dodecafluoroheptanoic acid; 7H-Perfluoroheptanoic acid; Dodecafluroheptylic acid; ω-Hydroperfluoroenanthic acid; ω-Hydroperfluoroheptanoic acid; ω-Monohydroperfluoroheptanoic acid	C7 H2 F12 O2	OC(=O)C(F)(F)C(F)(F)C(F)(F)C(F)(F)C(F)(F)C(F)F		108	1-H perfluoroalkyl carboxylic acids	0	5	1	1	0	0	NA	0	1-H	OC(=O)C(F)(F)C(F)(F)C(F)(F)C(F)(F)C(F)(F)C(F)F	O	C(=O)C(F)(F)C(F)(F)C(F)(F)C(F)(F)C(F)(F)C(F)F	1	C(=O)		3	1546-95-8	OC(=O)C(F)(F)C(F)(F)C(F)(F)C(F)(F)C(F)(F)C(F)F	JZHDEEOTEUVLHR-UHFFFAOYSA-N	Organic compounds	Lipids and lipid-like molecules	Fatty Acyls	Fatty acids and conjugates	Medium-chain fatty acids	This compound belongs to the class of organic compounds known as medium-chain fatty acids. These are fatty acids with an aliphatic tail that contains between 4 and 12 carbon atoms.	Aliphatic acyclic compounds	SMILES			1546-95-8	OC(=O)CCCCCC	MNWFXJYAOYHMED-UHFFFAOYSA-N	Organic compounds	Lipids and lipid-like molecules	Fatty Acyls	Fatty acids and conjugates	Medium-chain fatty acids	This compound belongs to the class of organic compounds known as medium-chain fatty acids. These are fatty acids with an aliphatic tail that contains between 4 and 12 carbon atoms.	Aliphatic acyclic compounds	SMILES
3231	1726-50-7	Hexanoic acid, 2,2,3,3,4,4,5,5,6,6-decafluoro-	2,2,3,3,4,4,5,5,6,6-Decafluorohexanoic acid	C6 H2 F10 O2	OC(=O)C(F)(F)C(F)(F)C(F)(F)C(F)(F)C(F)F		108	1-H perfluoroalkyl carboxylic acids	0	4	1	1	0	0	NA	0	1-H	OC(=O)C(F)(F)C(F)(F)C(F)(F)C(F)(F)C(F)F	O	C(=O)C(F)(F)C(F)(F)C(F)(F)C(F)(F)C(F)F	1	C(=O)		3	1726-50-7	OC(=O)C(F)(F)C(F)(F)C(F)(F)C(F)(F)C(F)F	XRFUZLYVDISQAA-UHFFFAOYSA-N	Organic compounds	Lipids and lipid-like molecules	Fatty Acyls	Fatty acids and conjugates	Medium-chain fatty acids	This compound belongs to the class of organic compounds known as medium-chain fatty acids. These are fatty acids with an aliphatic tail that contains between 4 and 12 carbon atoms.	Aliphatic acyclic compounds	SMILES			1726-50-7	OC(=O)CCCCC	FUZZWVXGSFPDMH-UHFFFAOYSA-N	Organic compounds	Lipids and lipid-like molecules	Fatty Acyls	Fatty acids and conjugates	Medium-chain fatty acids	This compound belongs to the class of organic compounds known as medium-chain fatty acids. These are fatty acids with an aliphatic tail that contains between 4 and 12 carbon atoms.	Aliphatic acyclic compounds	SMILES
3232	1765-48-6	Undecanoic acid, 2,2,3,3,4,4,5,5,6,6,7,7,8,8,9,9,10,10,11,11-eicosafluoro-	2,2,3,3,4,4,5,5,6,6,7,7,8,8,9,9,10,10,11,11-Eicosafluoroundecanoic acid; 11-H-Eicosafluoroundecanoic acid; ω-Hydroperfluoroundecanoic acid; ω-Monohydroperfluoroundecanoic acid	C11 H2 F20 O2	OC(=O)C(F)(F)C(F)(F)C(F)(F)C(F)(F)C(F)(F)C(F)(F)C(F)(F)C(F)(F)C(F)(F)C(F)F		108	1-H perfluoroalkyl carboxylic acids	1	9	1	0	0	0	NA	0	1-H	OC(=O)C(F)(F)C(F)(F)C(F)(F)C(F)(F)C(F)(F)C(F)(F)C(F)(F)C(F)(F)C(F)(F)C(F)F	O	C(=O)C(F)(F)C(F)(F)C(F)(F)C(F)(F)C(F)(F)C(F)(F)C(F)(F)C(F)(F)C(F)(F)C(F)F	1	C(=O)		3	1765-48-6	OC(=O)C(F)(F)C(F)(F)C(F)(F)C(F)(F)C(F)(F)C(F)(F)C(F)(F)C(F)(F)C(F)(F)C(F)F	MMYNPHSPRPZSSN-UHFFFAOYSA-N	Organic compounds	Lipids and lipid-like molecules	Fatty Acyls	Fatty acids and conjugates	Medium-chain fatty acids	This compound belongs to the class of organic compounds known as medium-chain fatty acids. These are fatty acids with an aliphatic tail that contains between 4 and 12 carbon atoms.	Aliphatic acyclic compounds	SMILES			1765-48-6	OC(=O)CCCCCCCCCC	ZDPHROOEEOARMN-UHFFFAOYSA-N	Organic compounds	Lipids and lipid-like molecules	Fatty Acyls	Fatty acids and conjugates	Medium-chain fatty acids	This compound belongs to the class of organic compounds known as medium-chain fatty acids. These are fatty acids with an aliphatic tail that contains between 4 and 12 carbon atoms.	Aliphatic acyclic compounds	SMILES
3235	3658-57-9	Octanoic acid, 7-(chlorodifluoromethyl)-2,2,3,3,4,4,5,5,6,6,7,8,8,8-tetradecafluoro-, ammonium salt (1:1)	Octanoic acid, 7-(chlorodifluoromethyl)-2,2,3,3,4,4,5,5,6,6,7,8,8,8-tetradecafluoro-, ammonium salt (7CI,9CI); Octanoic acid, 8-chloro-2,2,3,3,4,4,5,5,6,6,7,8,8-tridecafluoro-7-(trifluoromethyl)-, ammonium salt (8CI)	C9 H Cl F16 O2 . H3 N	[H]N([H])[H].OC(=O)C(F)(F)C(F)(F)C(F)(F)C(F)(F)C(F)(F)C(F)(C(F)(F)F)C(F)(F)Cl		102	perfluoroalkyl carboxylic acids (PFCAs), their salts and esters	1	8(1Cl)	0	0	0	0	NA	0	1-Cl	[H]N([H])[H].OC(=O)C(F)(F)C(F)(F)C(F)(F)C(F)(F)C(F)(F)C(F)(C(F)(F)F)C(F)(F)Cl	O	C(=O)C(F)(F)C(F)(F)C(F)(F)C(F)(F)C(F)(F)C(F)(C(F)(F)F)C(F)(F)Cl	1	C(=O)		5.1	3658-57-9	[H]N([H])[H].OC(=O)C(F)(F)C(F)(F)C(F)(F)C(F)(F)C(F)(F)C(F)(C(F)(F)F)C(F)(F)Cl	PMSOLKLHKDPYPN-UHFFFAOYSA-N	Organic compounds	Lipids and lipid-like molecules	Fatty Acyls	Fatty acids and conjugates	Medium-chain fatty acids	This compound belongs to the class of organic compounds known as medium-chain fatty acids. These are fatty acids with an aliphatic tail that contains between 4 and 12 carbon atoms.	Aliphatic acyclic compounds	SMILES			3658-57-9	[H]N([H])[H].OC(=O)CCCCCC(C)CCl	AJYRRHUELLPUFF-UHFFFAOYSA-N	Organic compounds	Lipids and lipid-like molecules	Fatty Acyls	Fatty acids and conjugates	Medium-chain fatty acids	This compound belongs to the class of organic compounds known as medium-chain fatty acids. These are fatty acids with an aliphatic tail that contains between 4 and 12 carbon atoms.	Aliphatic acyclic compounds	SMILES
3236	16557-94-1	Octanoic acid, 8-chloro-2,2,3,3,4,4,5,5,6,6,7,7,8,8-tetradecafluoro-, ammonium salt (1:1)	Octanoic acid, 8-chloro-2,2,3,3,4,4,5,5,6,6,7,7,8,8-tetradecafluoro-, ammonium salt (8CI,9CI)	C8 H Cl F14 O2 . H3 N	[NH4+].[O-]C(=O)C(F)(F)C(F)(F)C(F)(F)C(F)(F)C(F)(F)C(F)(F)C(F)(F)Cl		102	perfluoroalkyl carboxylic acids (PFCAs), their salts and esters	1	7(1Cl)	1	0	0	0	NA	0	1-Cl	[NH4+].[O-]C(=O)C(F)(F)C(F)(F)C(F)(F)C(F)(F)C(F)(F)C(F)(F)C(F)(F)Cl	[OH-]	C(=O)C(F)(F)C(F)(F)C(F)(F)C(F)(F)C(F)(F)C(F)(F)C(F)(F)Cl	1	C(=O)		5.1	16557-94-1	[NH4+].[O-]C(=O)C(F)(F)C(F)(F)C(F)(F)C(F)(F)C(F)(F)C(F)(F)C(F)(F)Cl	VQMQRMGKPBLNMC-UHFFFAOYSA-N	Organic compounds	Lipids and lipid-like molecules	Fatty Acyls	Fatty acids and conjugates	Medium-chain fatty acids	This compound belongs to the class of organic compounds known as medium-chain fatty acids. These are fatty acids with an aliphatic tail that contains between 4 and 12 carbon atoms.	Aliphatic acyclic compounds	SMILES			16557-94-1	[NH4+].[O-]C(=O)CCCCCCCCl	XHQGWLSRCNTAHQ-UHFFFAOYSA-N	Organic compounds	Lipids and lipid-like molecules	Fatty Acyls	Fatty acids and conjugates	Medium-chain fatty acids	This compound belongs to the class of organic compounds known as medium-chain fatty acids. These are fatty acids with an aliphatic tail that contains between 4 and 12 carbon atoms.	Aliphatic acyclic compounds	SMILES
3238	32687-76-6	Peroxide, bis(2,2,3,3,4,4,5,5,6,6,7,7-dodecafluoro-1-oxoheptyl)	Peroxide, bis(2,2,3,3,4,4,5,5,6,6,7,7-dodecafluoroheptanoyl) (8CI); Bis(2,2,3,3,4,4,5,5,6,6,7,7-dodecafluoro-1-oxoheptyl) peroxide; Bis(7H-dodecafluoroheptanoyl) peroxide; Bis(ω-hydrododecafluoroheptanoyl) peroxide	C14 H2 F24 O4	FC(F)C(F)(F)C(F)(F)C(F)(F)C(F)(F)C(F)(F)C(=O)OOC(=O)C(F)(F)C(F)(F)C(F)(F)C(F)(F)C(F)(F)C(F)F		108	1-H perfluoroalkyl carboxylic acids	0	5	1	1	0	0	NA	0	1-H; diacyl peroxide	FC(F)C(F)(F)C(F)(F)C(F)(F)C(F)(F)C(F)(F)C(=O)OOC(=O)C(F)(F)C(F)(F)C(F)(F)C(F)(F)C(F)(F)C(F)F	OO	FC(F)C(F)(F)C(F)(F)C(F)(F)C(F)(F)C(F)(F)C=O	2	C(=O)		3	32687-76-6	FC(F)C(F)(F)C(F)(F)C(F)(F)C(F)(F)C(F)(F)C(=O)OOC(=O)C(F)(F)C(F)(F)C(F)(F)C(F)(F)C(F)(F)C(F)F	RWRPNOCBTYVGOR-UHFFFAOYSA-N	Organic compounds	Organic acids and derivatives	Carboxylic acids and derivatives	Dicarboxylic acids and derivatives	Diacyl peroxides	This compound belongs to the class of organic compounds known as diacyl peroxides. These are organooxygen compounds containing a peroxide disubstituted with acyl groups.	Aliphatic acyclic compounds	SMILES			32687-76-6	CCCCCCC(=O)OOC(=O)CCCCCC	OGVNECREYWCLPP-UHFFFAOYSA-N	Organic compounds	Organic acids and derivatives	Carboxylic acids and derivatives	Dicarboxylic acids and derivatives	Diacyl peroxides	This compound belongs to the class of organic compounds known as diacyl peroxides. These are organooxygen compounds containing a peroxide disubstituted with acyl groups.	Aliphatic acyclic compounds	SMILES
3239	41405-35-0	Heptanoyl chloride, 2,2,3,3,4,4,5,5,6,6,7,7-dodecafluoro-	2,2,3,3,4,4,5,5,6,6,7,7-Dodecafluoroheptanoyl chloride; 7H-Dodecafluoroheptanoyl chloride	C7 H Cl F12 O	FC(F)C(F)(F)C(F)(F)C(F)(F)C(F)(F)C(F)(F)C(Cl)=O		107	1-H perfluoroalkyl carbonyl halides	0	5	1	1	0	0	NA	0	1-H	FC(F)C(F)(F)C(F)(F)C(F)(F)C(F)(F)C(F)(F)C(Cl)=O	Cl	FC(F)C(F)(F)C(F)(F)C(F)(F)C(F)(F)C(F)(F)C=O	1	C(=O)		3	41405-35-0	FC(F)C(F)(F)C(F)(F)C(F)(F)C(F)(F)C(F)(F)C(Cl)=O	SQQWEKUYKNKPOG-UHFFFAOYSA-N	Organic compounds	Organohalogen compounds	Acyl halides	Acyl chlorides	Acyl chlorides	This compound belongs to the class of organic compounds known as acyl chlorides. These are organic compounds containing the functional group -CO-Cl.	Aliphatic acyclic compounds	SMILES			41405-35-0	CCCCCCC(Cl)=O	UCVODTZQZHMTPN-UHFFFAOYSA-N	Organic compounds	Organohalogen compounds	Acyl halides	Acyl chlorides	Acyl chlorides	This compound belongs to the class of organic compounds known as acyl chlorides. These are organic compounds containing the functional group -CO-Cl.	Aliphatic acyclic compounds	SMILES
3248	72494-14-5	Hexanamide, 2-[2,4-bis(1,1-dimethylpropyl)phenoxy]-N-[3-hydroxy-4-[(2,2,3,3,4,4,5,5-octafluoro-1-oxopentyl)amino]phenyl]-	2-[2,4-Bis(1,1-dimethylpropyl)phenoxy]-N-[3-hydroxy-4-[(2,2,3,3,4,4,5,5-octafluoro-1-oxopentyl)amino]phenyl]hexanamide	C33 H42 F8 N2 O4	CCCCC(OC1=C(C=C(C=C1)C(C)(C)CC)C(C)(C)CC)C(=O)NC1=CC=C(NC(=O)C(F)(F)C(F)(F)C(F)(F)C(F)F)C(O)=C1		109	1-H perfluoroalkyl carbonyl-based non-polymers	0	3	1	1	0	0	NA	0	1-H	CCCCC(OC1=C(C=C(C=C1)C(C)(C)CC)C(C)(C)CC)C(=O)NC1=CC=C(NC(=O)C(F)(F)C(F)(F)C(F)(F)C(F)F)C(O)=C1	CCCCC(OC1=C(C=C(C=C1)C(C)(C)CC)C(C)(C)CC)C(=O)NC2=CC=C(N)C(O)=C2	C(=O)C(F)(F)C(F)(F)C(F)(F)C(F)F	1	C(=O)		3	72494-14-5	CCCCC(OC1=C(C=C(C=C1)C(C)(C)CC)C(C)(C)CC)C(=O)NC1=CC=C(NC(=O)C(F)(F)C(F)(F)C(F)(F)C(F)F)C(O)=C1	YQTBVQGDWOBHRU-UHFFFAOYSA-N	Organic compounds	Benzenoids	Benzene and substituted derivatives	Anilides	Anilides	This compound belongs to the class of organic compounds known as anilides. These are organic heterocyclic compounds derived from oxoacids RkE(=O)l(OH)m (l not 0) by replacing an OH group by the NHPh group or derivative formed by ring substitution.	Aromatic homomonocyclic compounds	SMILES			72494-14-5	CCCCC(OC1=C(C=C(C=C1)C(C)(C)CC)C(C)(C)CC)C(=O)NC1=CC=C(NC(=O)CCCC)C(O)=C1	MSQNNZVBRXPWDV-UHFFFAOYSA-N	Organic compounds	Benzenoids	Benzene and substituted derivatives	Anilides	Anilides	This compound belongs to the class of organic compounds known as anilides. These are organic heterocyclic compounds derived from oxoacids RkE(=O)l(OH)m (l not 0) by replacing an OH group by the NHPh group or derivative formed by ring substitution.	Aromatic homomonocyclic compounds	SMILES
3249	72828-80-9	Pentanoic acid, 2,2,3,3,4,4,5,5-octafluoro-, octyl ester		C13 H18 F8 O2	CCCCC(=O)OCC(F)(F)C(F)(F)C(F)(F)C(F)(F)CCC		108	1-H perfluoroalkyl carboxylic acids	0	3	1	1	0	0	NA	0	1-H	CCCCC(=O)OCC(F)(F)C(F)(F)C(F)(F)C(F)(F)CCC	C	CCCCC(=O)OCC(F)(F)C(F)(F)C(F)(F)C(F)(F)CC	1	[CH2][CH2]		5.1	72828-80-9	CCCCC(=O)OCC(F)(F)C(F)(F)C(F)(F)C(F)(F)CCC	PQKROKRLQONMBH-UHFFFAOYSA-N	Organic compounds	Lipids and lipid-like molecules	Fatty Acyls	Fatty acid esters	Fatty acid esters	This compound belongs to the class of organic compounds known as fatty acid esters. These are carboxylic ester derivatives of a fatty acid.	Aliphatic acyclic compounds	SMILES			72828-80-9	CCCCC(=O)OCCCCCCCC	OUYCCOBIJYUMAK-UHFFFAOYSA-N	Organic compounds	Lipids and lipid-like molecules	Fatty Acyls	Fatty alcohol esters	Fatty alcohol esters	This compound belongs to the class of organic compounds known as fatty alcohol esters. These are ester derivatives of a fatty alcohol.	Aliphatic acyclic compounds	SMILES
3279	0336-08-03	Hexanedioic acid, 2,2,3,3,4,4,5,5-octafluoro-	Hexanedioic acid, octafluoro- (6CI,7CI,8CI,9CI); 2,2,3,3,4,4,5,5-Octafluorohexanedioic acid; Octafluoroadipic acid; Octafluorohexanedioic acid; Perfluoroadipic acid	C6 H2 F8 O4	OC(=O)C(F)(F)C(F)(F)C(F)(F)C(F)(F)C(O)=O	62705-60-6	106	perfluoroalkyl carbonyl dicarboxylic acids and non-polymers	0	4	1	0	0	0	NA	0		OC(=O)C(F)(F)C(F)(F)C(F)(F)C(F)(F)C(O)=O	O|O	C(=O)C(F)(F)C(F)(F)C(F)(F)C(F)(F)C=O	2	C(=O)		5.1	0336-08-03	OC(=O)C(F)(F)C(F)(F)C(F)(F)C(F)(F)C(O)=O	AXRSOGFYDSXLQX-UHFFFAOYSA-N	Organic compounds	Lipids and lipid-like molecules	Fatty Acyls	Fatty acids and conjugates	Medium-chain fatty acids	This compound belongs to the class of organic compounds known as medium-chain fatty acids. These are fatty acids with an aliphatic tail that contains between 4 and 12 carbon atoms.	Aliphatic acyclic compounds	SMILES			0336-08-03	OC(=O)CCCCC(O)=O	WNLRTRBMVRJNCN-UHFFFAOYSA-N	Organic compounds	Lipids and lipid-like molecules	Fatty Acyls	Fatty acids and conjugates	Medium-chain fatty acids	This compound belongs to the class of organic compounds known as medium-chain fatty acids. These are fatty acids with an aliphatic tail that contains between 4 and 12 carbon atoms.	Aliphatic acyclic compounds	SMILES
3600	307-78-8	Decanedioic acid, 2,2,3,3,4,4,5,5,6,6,7,7,8,8,9,9-hexadecafluoro-	Decanedioic acid, hexadecafluoro- (6CI,7CI,8CI,9CI); 2,2,3,3,4,4,5,5,6,6,7,7,8,8,9,9-Hexadecafluorodecanedioic acid; Hexadecafluorosebacic acid; Perfluorodecanedioic acid; Perfluorosebacic acid	C10 H2 F16 O4	OC(=O)C(F)(F)C(F)(F)C(F)(F)C(F)(F)C(F)(F)C(F)(F)C(F)(F)C(F)(F)C(O)=O	110961-34-7	106	perfluoroalkyl carbonyl dicarboxylic acids and non-polymers	0	8	1	0	0	0	NA	0		OC(=O)C(F)(F)C(F)(F)C(F)(F)C(F)(F)C(F)(F)C(F)(F)C(F)(F)C(F)(F)C(O)=O	O|O	C(=O)C(F)(F)C(F)(F)C(F)(F)C(F)(F)C(F)(F)C(F)(F)C(F)(F)C(F)(F)C=O	2	C(=O)		5.1	307-78-8	OC(=O)C(F)(F)C(F)(F)C(F)(F)C(F)(F)C(F)(F)C(F)(F)C(F)(F)C(F)(F)C(O)=O	YPCSMEGZIYWAAZ-UHFFFAOYSA-N	Organic compounds	Lipids and lipid-like molecules	Fatty Acyls	Fatty acids and conjugates	Medium-chain fatty acids	This compound belongs to the class of organic compounds known as medium-chain fatty acids. These are fatty acids with an aliphatic tail that contains between 4 and 12 carbon atoms.	Aliphatic acyclic compounds	SMILES			307-78-8	OC(=O)CCCCCCCCC(O)=O	CXMXRPHRNRROMY-UHFFFAOYSA-N	Organic compounds	Lipids and lipid-like molecules	Fatty Acyls	Fatty acids and conjugates	Medium-chain fatty acids	This compound belongs to the class of organic compounds known as medium-chain fatty acids. These are fatty acids with an aliphatic tail that contains between 4 and 12 carbon atoms.	Aliphatic acyclic compounds	SMILES
3609	0336-06-01	Hexanedioyl dichloride, 2,2,3,3,4,4,5,5-octafluoro-	Hexanedioyl chloride, octafluoro- (6CI,7CI,8CI); Hexanedioyl dichloride, octafluoro- (9CI); 2,2,3,3,4,4,5,5-Octafluorohexanedioyl dichloride; Octafluoroadipic acid chloride; Octafluoroadipic acid dichloride; Octafluoroadipoyl chloride	C6 Cl2 F8 O2	FC(F)(C(Cl)=O)C(F)(F)C(F)(F)C(F)(F)C(Cl)=O		105	perfluoroalkyl carbonyl dicarbonyl halides	0	4	1	1	0	0	NA	0		FC(F)(C(Cl)=O)C(F)(F)C(F)(F)C(F)(F)C(Cl)=O	Cl|Cl	FC(F)(C=O)C(F)(F)C(F)(F)C(F)(F)C=O	2	C(=O)		5.1	0336-06-01	FC(F)(C(Cl)=O)C(F)(F)C(F)(F)C(F)(F)C(Cl)=O	NGSYNEZFBAPQFK-UHFFFAOYSA-N	Organic compounds	Organohalogen compounds	Acyl halides	Acyl chlorides	Acyl chlorides	This compound belongs to the class of organic compounds known as acyl chlorides. These are organic compounds containing the functional group -CO-Cl.	Aliphatic acyclic compounds	SMILES			0336-06-01	C(C(Cl)=O)CCCC(Cl)=O	PWAXUOGZOSVGBO-UHFFFAOYSA-N	Organic compounds	Organohalogen compounds	Acyl halides	Acyl chlorides	Acyl chlorides	This compound belongs to the class of organic compounds known as acyl chlorides. These are organic compounds containing the functional group -CO-Cl.	Aliphatic acyclic compounds	SMILES
3617	355-66-8	Hexanediamide, 2,2,3,3,4,4,5,5-octafluoro-	2,2,3,3,4,4,5,5-Octafluorohexanediamide; NSC 231449; Perfluoroadipic diamide	C6 H4 F8 N2 O2	NC(=O)C(F)(F)C(F)(F)C(F)(F)C(F)(F)C(N)=O		106	perfluoroalkyl carbonyl dicarboxylic acids and non-polymers	0	4	1	1	0	0	NA	0		NC(=O)C(F)(F)C(F)(F)C(F)(F)C(F)(F)C(N)=O	[NH2]|[NH2]	C(=O)C(F)(F)C(F)(F)C(F)(F)C(F)(F)C=O	2	C(=O)		5.1	355-66-8	NC(=O)C(F)(F)C(F)(F)C(F)(F)C(F)(F)C(N)=O	SVURUIRNGAQISR-UHFFFAOYSA-N	Organic compounds	Lipids and lipid-like molecules	Fatty Acyls	Fatty amides	Fatty amides	This compound belongs to the class of organic compounds known as fatty amides. These are carboxylic acid amide derivatives of fatty acids, that are formed from a fatty acid and an amine.	Aliphatic acyclic compounds	SMILES			355-66-8	NC(=O)CCCCC(N)=O	GVNWZKBFMFUVNX-UHFFFAOYSA-N	Organic compounds	Lipids and lipid-like molecules	Fatty Acyls	Fatty amides	Fatty amides	This compound belongs to the class of organic compounds known as fatty amides. These are carboxylic acid amide derivatives of fatty acids, that are formed from a fatty acid and an amine.	Aliphatic acyclic compounds	SMILES
3621	355-81-7	Pentanamide, 2,2,3,3,4,4,5,5-octafluoro-	Valeramide, 2,2,3,3,4,4,5,5-octafluoro- (8CI); 2,2,3,3,4,4,5,5-Octafluoropentanamide	C5 H3 F8 N O	NC(=O)C(F)(F)C(F)(F)C(F)(F)C(F)F		109	1-H perfluoroalkyl carbonyl-based non-polymers	0	4(1H)	1	1	0	0	NA	1	chain length of degradation products uncertain	NC(=O)C(F)(F)C(F)(F)C(F)(F)C(F)F	[NH2]	C(=O)C(F)(F)C(F)(F)C(F)(F)C(F)F	1	C(=O)		3	355-81-7	NC(=O)C(F)(F)C(F)(F)C(F)(F)C(F)F	QNNUQHBPTQVSFD-UHFFFAOYSA-N	Organic compounds	Lipids and lipid-like molecules	Fatty Acyls	Fatty amides	Fatty amides	This compound belongs to the class of organic compounds known as fatty amides. These are carboxylic acid amide derivatives of fatty acids, that are formed from a fatty acid and an amine.	Aliphatic acyclic compounds	SMILES			355-81-7	NC(=O)CCCC	IPWFJLQDVFKJDU-UHFFFAOYSA-N	Organic compounds	Lipids and lipid-like molecules	Fatty Acyls	Fatty amides	Fatty amides	This compound belongs to the class of organic compounds known as fatty amides. These are carboxylic acid amide derivatives of fatty acids, that are formed from a fatty acid and an amine.	Aliphatic acyclic compounds	SMILES
3631	376-68-1	2H-Pyran-2,6(3H)-dione, 3,3,4,4,5,5-hexafluorodihydro-	Glutaric anhydride, hexafluoro- (6CI,8CI); 3,3,4,4,5,5-Hexafluorodihydro-2H-pyran-2,6(3H)-dione; Hexafluoroglutaric anhydride; Perfluoroglutaric anhydride	C5 F6 O3	FC1(F)C(=O)OC(=O)C(F)(F)C1(F)F		106	perfluoroalkyl carbonyl dicarboxylic acids and non-polymers	0	3	1	1	0	0	NA	0		FC1(F)C(=O)OC(=O)C(F)(F)C1(F)F	O	FC(F)(C=O)C(C(C=O)(F)F)(F)F	1	C(=O)		1	376-68-1	FC1(F)C(=O)OC(=O)C(F)(F)C1(F)F	IHYAGCYJVNHXCT-UHFFFAOYSA-N	Organic compounds	Organoheterocyclic compounds	Lactones	Delta valerolactones	Delta valerolactones	This compound belongs to the class of organic compounds known as delta valerolactones. These are cyclic organic compounds containing an oxan-2- one moiety.	Aliphatic heteromonocyclic compounds	SMILES			376-68-1	C1C(=O)OC(=O)CC1	VANNPISTIUFMLH-UHFFFAOYSA-N	Organic compounds	Organoheterocyclic compounds	Lactones	Delta valerolactones	Delta valerolactones	This compound belongs to the class of organic compounds known as delta valerolactones. These are cyclic organic compounds containing an oxan-2- one moiety.	Aliphatic heteromonocyclic compounds	SMILES
3632	376-73-8	Pentanedioic acid, 2,2,3,3,4,4-hexafluoro-	Glutaric acid, hexafluoro- (6CI,7CI,8CI); Pentanedioic acid, hexafluoro- (9CI); 2,2,3,3,4,4-Hexafluoropentanedioic acid; 2,2,3,3,4,4-Hexafluoroglutaric acid; Hexafluoroglutaric acid; NSC 6826; Perfluoroglutaric acid	C5 H2 F6 O4	OC(=O)C(F)(F)C(F)(F)C(F)(F)C(O)=O		106	perfluoroalkyl carbonyl dicarboxylic acids and non-polymers	0	3	1	0	0	0	NA	0		OC(=O)C(F)(F)C(F)(F)C(F)(F)C(O)=O	O|O	C(=O)C(F)(F)C(F)(F)C(F)(F)C=O	2	C(=O)		5.1	376-73-8	OC(=O)C(F)(F)C(F)(F)C(F)(F)C(O)=O	CCUWGJDGLACFQT-UHFFFAOYSA-N	Organic compounds	Lipids and lipid-like molecules	Fatty Acyls	Fatty acids and conjugates	Halogenated fatty acids	This compound belongs to the class of organic compounds known as halogenated fatty acids. These are fatty acids with a chain that carries a halogen atom (Cl,F,I,Br).	Aliphatic acyclic compounds	SMILES			376-73-8	OC(=O)CCCC(O)=O	JFCQEDHGNNZCLN-UHFFFAOYSA-N	Organic compounds	Organic acids and derivatives	Carboxylic acids and derivatives	Dicarboxylic acids and derivatives	Dicarboxylic acids and derivatives	This compound belongs to the class of organic compounds known as dicarboxylic acids and derivatives. These are organic compounds containing exactly two carboxylic acid groups.	Aliphatic acyclic compounds	SMILES
3642	424-40-8	Pentanedioic acid, 2,2,3,3,4,4-hexafluoro-, 1,5-diethyl ester	Glutaric acid, hexafluoro-, diethyl ester (7CI,8CI); Pentanedioic acid, hexafluoro-, diethyl ester (9CI); Diethyl hexafluoroglutarate; Diethyl perfluoroglutarate; NSC 63360	C9 H10 F6 O4	CCOC(=O)C(F)(F)C(F)(F)C(F)(F)C(=O)OCC		106	perfluoroalkyl carbonyl dicarboxylic acids and non-polymers	0	3	1	1	0	0	NA	0		CCOC(=O)C(F)(F)C(F)(F)C(F)(F)C(=O)OCC	CCO|OCC	C(=O)C(F)(F)C(F)(F)C(F)(F)C=O	2	C(=O)		5.1	424-40-8	CCOC(=O)C(F)(F)C(F)(F)C(F)(F)C(=O)OCC	MSDPXVBLFJODJO-UHFFFAOYSA-N	Organic compounds	Lipids and lipid-like molecules	Fatty Acyls	Fatty acid esters	Fatty acid esters	This compound belongs to the class of organic compounds known as fatty acid esters. These are carboxylic ester derivatives of a fatty acid.	Aliphatic acyclic compounds	SMILES			424-40-8	CCOC(=O)CCCC(=O)OCC	OUWSNHWQZPEFEX-UHFFFAOYSA-N	Organic compounds	Lipids and lipid-like molecules	Fatty Acyls	Fatty acid esters	Fatty acid esters	This compound belongs to the class of organic compounds known as fatty acid esters. These are carboxylic ester derivatives of a fatty acid.	Aliphatic acyclic compounds	SMILES
3649	678-45-5	Octanedioic acid, 2,2,3,3,4,4,5,5,6,6,7,7-dodecafluoro-	Octanedioic acid, dodecafluoro- (7CI,8CI,9CI); 2,2,3,3,4,4,5,5,6,6,7,7-Dodecafluorooctanedioic acid; Dodecafluorooctanedioic acid; Perfluorooctanedioic acid; Perfluorosuberic acid	C8 H2 F12 O4	OC(=O)C(F)(F)C(F)(F)C(F)(F)C(F)(F)C(F)(F)C(F)(F)C(O)=O		106	perfluoroalkyl carbonyl dicarboxylic acids and non-polymers	0	8	1	0	0	0	NA	0		OC(=O)C(F)(F)C(F)(F)C(F)(F)C(F)(F)C(F)(F)C(F)(F)C(O)=O	O|O	C(=O)C(F)(F)C(F)(F)C(F)(F)C(F)(F)C(F)(F)C(F)(F)C=O	2	C(=O)		5.1	678-45-5	OC(=O)C(F)(F)C(F)(F)C(F)(F)C(F)(F)C(F)(F)C(F)(F)C(O)=O	QYCPVKMFWNBDPV-UHFFFAOYSA-N	Organic compounds	Lipids and lipid-like molecules	Fatty Acyls	Fatty acids and conjugates	Medium-chain fatty acids	This compound belongs to the class of organic compounds known as medium-chain fatty acids. These are fatty acids with an aliphatic tail that contains between 4 and 12 carbon atoms.	Aliphatic acyclic compounds	SMILES			678-45-5	OC(=O)CCCCCCC(O)=O	TYFQFVWCELRYAO-UHFFFAOYSA-N	Organic compounds	Lipids and lipid-like molecules	Fatty Acyls	Fatty acids and conjugates	Medium-chain fatty acids	This compound belongs to the class of organic compounds known as medium-chain fatty acids. These are fatty acids with an aliphatic tail that contains between 4 and 12 carbon atoms.	Aliphatic acyclic compounds	SMILES
3651	678-77-3	Pentanedioyl dichloride, 2,2,3,3,4,4-hexafluoro-	Glutaryl chloride, hexafluoro- (6CI,7CI,8CI); Pentanedioyl dichloride, hexafluoro- (9CI); 2,2,3,3,4,4-Hexafluoropentanedioyl dichloride; Hexafluoroglutaryl chloride; Hexafluoroglutaryl dichloride; NSC 41888; Perfluoroglutaryl chloride	C5 Cl2 F6 O2	FC(F)(C(Cl)=O)C(F)(F)C(F)(F)C(Cl)=O		105	perfluoroalkyl carbonyl dicarbonyl halides	0	3	1	1	0	0	NA	0		FC(F)(C(Cl)=O)C(F)(F)C(F)(F)C(Cl)=O	Cl|Cl	FC(F)(C=O)C(F)(F)C(F)(F)C=O	2	C(=O)		5.1	678-77-3	FC(F)(C(Cl)=O)C(F)(F)C(F)(F)C(Cl)=O	QOLALWJWCONGMG-UHFFFAOYSA-N	Organic compounds	Organohalogen compounds	Acyl halides	Acyl chlorides	Acyl chlorides	This compound belongs to the class of organic compounds known as acyl chlorides. These are organic compounds containing the functional group -CO-Cl.	Aliphatic acyclic compounds	SMILES			678-77-3	C(C(Cl)=O)CCC(Cl)=O	YVOFTMXWTWHRBH-UHFFFAOYSA-N	Organic compounds	Organohalogen compounds	Acyl halides	Acyl chlorides	Acyl chlorides	This compound belongs to the class of organic compounds known as acyl chlorides. These are organic compounds containing the functional group -CO-Cl.	Aliphatic acyclic compounds	SMILES
3661	865-79-2	Nonanoic acid, 9-chloro-2,2,3,3,4,4,5,5,6,6,7,7,8,8,9,9-hexadecafluoro-	9-Chloro-2,2,3,3,4,4,5,5,6,6,7,7,8,8,9,9-hexadecafluorononanoic acid; ω-Chloroperfluoropelargonic acid	C9 H Cl F16 O2	OC(=O)C(F)(F)C(F)(F)C(F)(F)C(F)(F)C(F)(F)C(F)(F)C(F)(F)C(F)(F)Cl		102	perfluoroalkyl carboxylic acids (PFCAs), their salts and esters	1	8(1Cl)	1	0	0	0	NA	1	degradation uncertain	OC(=O)C(F)(F)C(F)(F)C(F)(F)C(F)(F)C(F)(F)C(F)(F)C(F)(F)C(F)(F)Cl	O	C(=O)C(F)(F)C(F)(F)C(F)(F)C(F)(F)C(F)(F)C(F)(F)C(F)(F)C(F)(F)Cl	1	C(=O)		5.1	865-79-2	OC(=O)C(F)(F)C(F)(F)C(F)(F)C(F)(F)C(F)(F)C(F)(F)C(F)(F)C(F)(F)Cl	QDGYPYFSHOUVLE-UHFFFAOYSA-N	Organic compounds	Lipids and lipid-like molecules	Fatty Acyls	Fatty acids and conjugates	Medium-chain fatty acids	This compound belongs to the class of organic compounds known as medium-chain fatty acids. These are fatty acids with an aliphatic tail that contains between 4 and 12 carbon atoms.	Aliphatic acyclic compounds	SMILES			865-79-2	OC(=O)CCCCCCCCCl	DFJLDESPZKERQH-UHFFFAOYSA-N	Organic compounds	Lipids and lipid-like molecules	Fatty Acyls	Fatty acids and conjugates	Medium-chain fatty acids	This compound belongs to the class of organic compounds known as medium-chain fatty acids. These are fatty acids with an aliphatic tail that contains between 4 and 12 carbon atoms.	Aliphatic acyclic compounds	SMILES
3680	2264-25-7	Heptanoic acid, 2,2,3,3,4,4,5,5,6,6,7,7-dodecafluoro-, sodium salt (1:1)	Heptanoic acid, 2,2,3,3,4,4,5,5,6,6,7,7-dodecafluoro-, sodium salt (8CI,9CI); Sodium 7-hydroperfluoroheptanoate; Sodium 7H-dodecafluoroheptanoate	C7 H2 F12 O2 . Na	[Na+].[O-]C(=O)C(F)(F)C(F)(F)C(F)(F)C(F)(F)C(F)(F)C(F)F		108	1-H perfluoroalkyl carboxylic acids	0	5	1	1	0	0	NA	1	degradation uncertain	[Na+].[O-]C(=O)C(F)(F)C(F)(F)C(F)(F)C(F)(F)C(F)(F)C(F)F	[OH-]	C(=O)C(F)(F)C(F)(F)C(F)(F)C(F)(F)C(F)(F)C(F)F	1	C(=O)		3	2264-25-7	[Na+].[O-]C(=O)C(F)(F)C(F)(F)C(F)(F)C(F)(F)C(F)(F)C(F)F	SZWOFFNEMGRGMA-UHFFFAOYSA-M	Organic compounds	Lipids and lipid-like molecules	Fatty Acyls	Fatty acids and conjugates	Medium-chain fatty acids	This compound belongs to the class of organic compounds known as medium-chain fatty acids. These are fatty acids with an aliphatic tail that contains between 4 and 12 carbon atoms.	Aliphatic acyclic compounds	SMILES			2264-25-7	[Na+].[O-]C(=O)CCCCCC	NMTDPTPUELYEPL-UHFFFAOYSA-M	Organic compounds	Lipids and lipid-like molecules	Fatty Acyls	Fatty acids and conjugates	Medium-chain fatty acids	This compound belongs to the class of organic compounds known as medium-chain fatty acids. These are fatty acids with an aliphatic tail that contains between 4 and 12 carbon atoms.	Aliphatic acyclic compounds	SMILES
3686	3492-23-7	Octanediamide, 2,2,3,3,4,4,5,5,6,6,7,7-dodecafluoro-	2,2,3,3,4,4,5,5,6,6,7,7-Dodecafluorooctanediamide	C8 H4 F12 N2 O2	NC(=O)C(F)(F)C(F)(F)C(F)(F)C(F)(F)C(F)(F)C(F)(F)C(N)=O		103.01	perfluoroalkyl carbonyl amides / amido ethanols and other alcohols	0	6	1	1	0	0	NA	0		NC(=O)C(F)(F)C(F)(F)C(F)(F)C(F)(F)C(F)(F)C(F)(F)C(N)=O	[NH2]|[NH2]	C(=O)C(F)(F)C(F)(F)C(F)(F)C(F)(F)C(F)(F)C(F)(F)C=O	2	C(=O)		5.1	3492-23-7	NC(=O)C(F)(F)C(F)(F)C(F)(F)C(F)(F)C(F)(F)C(F)(F)C(N)=O	SYUPSOPAIUOEGW-UHFFFAOYSA-N	Organic compounds	Lipids and lipid-like molecules	Fatty Acyls	Fatty amides	Fatty amides	This compound belongs to the class of organic compounds known as fatty amides. These are carboxylic acid amide derivatives of fatty acids, that are formed from a fatty acid and an amine.	Aliphatic acyclic compounds	SMILES			3492-23-7	NC(=O)CCCCCCC(N)=O	NFVUAUVSFDFOJT-UHFFFAOYSA-N	Organic compounds	Lipids and lipid-like molecules	Fatty Acyls	Fatty amides	Fatty amides	This compound belongs to the class of organic compounds known as fatty amides. These are carboxylic acid amide derivatives of fatty acids, that are formed from a fatty acid and an amine.	Aliphatic acyclic compounds	SMILES
3695	5102-53-4	Tetradecanedioic acid, 2,2,3,3,4,4,5,5,6,6,7,7,8,8,9,9,10,10,11,11,12,12,13,13-tetracosafluoro-, 1,14-dihydrazide	Tetradecanedioic acid, tetracosafluoro-, dihydrazide (7CI,8CI)	C14 H6 F24 N4 O2	NNC(=O)C(F)(F)C(F)(F)C(F)(F)C(F)(F)C(F)(F)C(F)(F)C(F)(F)C(F)(F)C(F)(F)C(F)(F)C(F)(F)C(F)(F)C(=O)NN		103	other perfluoroalkyl carbonyl-based nonpolymers	0	12	1	1	0	0	NA	0		NNC(=O)C(F)(F)C(F)(F)C(F)(F)C(F)(F)C(F)(F)C(F)(F)C(F)(F)C(F)(F)C(F)(F)C(F)(F)C(F)(F)C(F)(F)C(=O)NN	NN|NN	C(=O)C(F)(F)C(F)(F)C(F)(F)C(F)(F)C(F)(F)C(F)(F)C(F)(F)C(F)(F)C(F)(F)C(F)(F)C(F)(F)C(F)(F)C=O	2	C(=O)		5.1	5102-53-4	NNC(=O)C(F)(F)C(F)(F)C(F)(F)C(F)(F)C(F)(F)C(F)(F)C(F)(F)C(F)(F)C(F)(F)C(F)(F)C(F)(F)C(F)(F)C(=O)NN	DVGAKXCCCMYSPK-UHFFFAOYSA-N	Organic compounds	Organic acids and derivatives	Carboxylic acids and derivatives	Carboxylic acid derivatives	Carboxylic acid hydrazides	This compound belongs to the class of organic compounds known as carboxylic acid hydrazides. These are carboxylic acid derivatives containing a carbonyl group in which the carbon is directly linked to a hydrazide group (N-N).	Aliphatic acyclic compounds	SMILES			5102-53-4	NNC(=O)CCCCCCCCCCCCC(=O)NN	CMMODZDJEBXBHK-UHFFFAOYSA-N	Organic compounds	Organic acids and derivatives	Carboxylic acids and derivatives	Carboxylic acid derivatives	Carboxylic acid hydrazides	This compound belongs to the class of organic compounds known as carboxylic acid hydrazides. These are carboxylic acid derivatives containing a carbonyl group in which the carbon is directly linked to a hydrazide group (N-N).	Aliphatic acyclic compounds	SMILES
3696	5158-52-1	1-Propanaminium, N-(2-carboxyethyl)-N,N-dimethyl-3-[(2,2,3,3,4,4,5,5,6,6,7,7,8,8,8-pentadecafluoro-1-oxooctyl)amino]-, inner salt	(2-Carboxyethyl)dimethyl[3-(2,2,3,3,4,4,5,5,6,6,7,7,8,8,8-pentadecafluorooctanamido)propyl]ammonium hydroxide, inner salt (7CI); Ammonium, (2-carboxyethyl)dimethyl[3-(2,2,3,3,4,4,5,5,6,6,7,7,8,8,8-pentadecafluorooctanamido)propyl]-, hydroxide, inner salt (8CI)	C16 H17 F15 N2 O3	C[N+](C)(CCCNC(=O)C(F)(F)C(F)(F)C(F)(F)C(F)(F)C(F)(F)C(F)(F)C(F)(F)F)CCC(O)=O	61481-07-0	103	other perfluoroalkyl carbonyl-based nonpolymers	1	7	1	1	0	0	NA	0		C[N+](C)(CCCNC(=O)C(F)(F)C(F)(F)C(F)(F)C(F)(F)C(F)(F)C(F)(F)C(F)(F)F)CCC(O)=O	C[N+](C)(CCCN)CCC(O)=O	C(=O)C(F)(F)C(F)(F)C(F)(F)C(F)(F)C(F)(F)C(F)(F)C(F)(F)F	1	C(=O)			5158-52-1	C[N+](C)(CCCNC(=O)C(F)(F)C(F)(F)C(F)(F)C(F)(F)C(F)(F)C(F)(F)C(F)(F)F)CCC(O)=O	JREGIWWPXUQSBC-UHFFFAOYSA-O	Organic compounds	Organohalogen compounds	Alkyl halides	Alkyl fluorides	Perfluoroalkyl carboxylic acid and derivatives	This compound belongs to the class of organic compounds known as perfluoroalkyl carboxylic acid and derivatives. These are organic compounds containing an alkyl chain attached to the C-alpha of a carboxylic acid group (or a derivative thereof), where all hydrogens of the alkyl chain are replaced by fluorine atoms.	Aliphatic acyclic compounds	SMILES			5158-52-1	C[N+](C)(CCCNC(=O)CCCCCCC)CCC(O)=O	SFHYVDYTTVITRM-UHFFFAOYSA-O	Organic compounds	Lipids and lipid-like molecules	Fatty Acyls	Fatty amides	N-acyl amines	This compound belongs to the class of organic compounds known as n-acyl amines. These are compounds containing a fatty acid moiety linked to an amine group through an ester linkage.	Aliphatic acyclic compounds	SMILES
3697	6588-63-2	Cyclohexanecarbonyl fluoride, 1,2,2,3,3,4,4,5,5,6,6-undecafluoro-	Cyclohexanecarbonyl fluoride, undecafluoro- (7CI,9CI); 1,2,2,3,3,4,4,5,5,6,6-Undecafluorocyclohexanecarbonyl fluoride; Perfluorocyclohexanecarbonyl fluoride; Perfluorocyclohexylcarbonyl fluoride; Undecafluorocyclohexanecarbonyl fluoride	C7 F12 O	FC(=O)C1(F)C(F)(F)C(F)(F)C(F)(F)C(F)(F)C1(F)F		101	perfluoroalkyl carbonyl halides	1	6(1R)	0	1	0	0	NA	0		FC(=O)C1(F)C(F)(F)C(F)(F)C(F)(F)C(F)(F)C1(F)F	NA	NA	NA	NA	No splittable bond found for the input molecule FC(=O)C1(F)C(F)(F)C(F)(F)C(F)(F)C(F)(F)C1(F)F	1	6588-63-2	FC(=O)C1(F)C(F)(F)C(F)(F)C(F)(F)C(F)(F)C1(F)F	HDVGMDBHTBNCLT-UHFFFAOYSA-N	Organic compounds	Organohalogen compounds	Alkyl halides	Cyclohexyl halides	Cyclohexyl halides	This compound belongs to the class of organic compounds known as cyclohexyl halides. These are organohalogen compounds containing a monocyclic cyclohexane moiety that is substituted at one or more positions by an halogen atom.	Aliphatic homomonocyclic compounds	SMILES			6588-63-2	FC(=O)C1CCCCC1	IVJNDWDAJQPCOA-UHFFFAOYSA-N	Organic compounds	Organohalogen compounds	Acyl halides	Acyl fluorides	Acyl fluorides	This compound belongs to the class of organic compounds known as acyl fluorides. These are organic compounds containing the functional group -CO-F.	Aliphatic homomonocyclic compounds	SMILES
3707	13973-14-3	Octanoic acid, 2,2,3,3,4,4,5,5,6,6,7,7,8,8-tetradecafluoro-	2,2,3,3,4,4,5,5,6,6,7,7,8,8-Tetradecafluorooctanoic acid	C8 H2 F14 O2	OC(=O)C(F)(F)C(F)(F)C(F)(F)C(F)(F)C(F)(F)C(F)(F)C(F)F		108	1-H perfluoroalkyl carboxylic acids	0	6	1	1	0	0	NA	0	1-H	OC(=O)C(F)(F)C(F)(F)C(F)(F)C(F)(F)C(F)(F)C(F)(F)C(F)F	O	C(=O)C(F)(F)C(F)(F)C(F)(F)C(F)(F)C(F)(F)C(F)(F)C(F)F	1	C(=O)		3	13973-14-3	OC(=O)C(F)(F)C(F)(F)C(F)(F)C(F)(F)C(F)(F)C(F)(F)C(F)F	AEBAYKKLSQLBDU-UHFFFAOYSA-N	Organic compounds	Lipids and lipid-like molecules	Fatty Acyls	Fatty acids and conjugates	Medium-chain fatty acids	This compound belongs to the class of organic compounds known as medium-chain fatty acids. These are fatty acids with an aliphatic tail that contains between 4 and 12 carbon atoms.	Aliphatic acyclic compounds	SMILES			13973-14-3	OC(=O)CCCCCCC	WWZKQHOCKIZLMA-UHFFFAOYSA-N	Organic compounds	Lipids and lipid-like molecules	Fatty Acyls	Fatty acids and conjugates	Medium-chain fatty acids	This compound belongs to the class of organic compounds known as medium-chain fatty acids. These are fatty acids with an aliphatic tail that contains between 4 and 12 carbon atoms.	Aliphatic acyclic compounds	SMILES
3743	28285-49-6	Peroxide, bis(3,5,6-trichloro-2,2,3,4,4,5,6,6-octafluoro-1-oxohexyl) (9CI)	Peroxide, bis(3,5,6-trichloro-2,2,3,4,4,5,6,6-octafluorohexanoyl) (8CI); Bis(3,5,6-trichloro-2,2,3,4,4,5,6,6-octafluorohexanoyl) peroxide; Bis(3,5,6-trichlorooctafluorohexanoyl) peroxide	C12 Cl6 F16 O4	FC(F)(Cl)C(F)(Cl)C(F)(F)C(F)(Cl)C(F)(F)C(=O)OOC(=O)C(F)(F)C(F)(Cl)C(F)(F)C(F)(Cl)C(F)(F)Cl		102	perfluoroalkyl carboxylic acids (PFCAs), their salts and esters	1	5(1Cl)	1	1	0	0	NA	1	degradation uncertain; 1-Cl	FC(F)(Cl)C(F)(Cl)C(F)(F)C(F)(Cl)C(F)(F)C(=O)OOC(=O)C(F)(F)C(F)(Cl)C(F)(F)C(F)(Cl)C(F)(F)Cl	OO	FC(F)(Cl)C(F)(Cl)C(F)(F)C(F)(Cl)C(F)(F)C=O	2	C(=O)		5.1	28285-49-6	FC(F)(Cl)C(F)(Cl)C(F)(F)C(F)(Cl)C(F)(F)C(=O)OOC(=O)C(F)(F)C(F)(Cl)C(F)(F)C(F)(Cl)C(F)(F)Cl	XIEKHWZMGUGSHG-UHFFFAOYSA-N	Organic compounds	Organic acids and derivatives	Carboxylic acids and derivatives	Dicarboxylic acids and derivatives	Diacyl peroxides	This compound belongs to the class of organic compounds known as diacyl peroxides. These are organooxygen compounds containing a peroxide disubstituted with acyl groups.	Aliphatic acyclic compounds	SMILES			28285-49-6	C(Cl)C(Cl)CC(Cl)CC(=O)OOC(=O)CC(Cl)CC(Cl)CCl	SQUYLXQSTCMYTD-UHFFFAOYSA-N	Organic compounds	Organic acids and derivatives	Carboxylic acids and derivatives	Dicarboxylic acids and derivatives	Diacyl peroxides	This compound belongs to the class of organic compounds known as diacyl peroxides. These are organooxygen compounds containing a peroxide disubstituted with acyl groups.	Aliphatic acyclic compounds	SMILES
[truncated: 40 more columns]

## Sheet: Sulfonyl
							Category in the OECD list											Split result								Scenario i)													Scenario ii)
ID_in_OECD_list	CAS_Number	Chemical_Name	Synonyms	Molecular_Formula	SMILES	Previously_used_CAS_Number	Structure_Category	Structure_Category_Name	Number_of_Functional_Groups	Perfluoroalkyl_Chain_Length	Linear_or_Branched_Isomer	X.Potential._precursor_to_PFAAs_in_the_environment.biota	Polymer	Mixture	Related_Chemicals	Uncertainty_in_Structure_Categorisation	Note	SMILES_in	R_group	CnF2n+1-X	N_PFAS_Groups_Out	SplitSMARTS (X)	SplitPFAS_errorMsg	Error_code	CAS_Number_OriginalMolecule	SMILES	new_InChIKey	kingdom_name	superclass_name	class_name	subclass_name	direct_parent_name	description	molecular_framework	ClassyFireSource	MSG	query_id	CAS_Number_OriginalMolecule	no_F_SMILES	new_InChIKey	kingdom_name	superclass_name	class_name	subclass_name	direct_parent_name	description	molecular_framework	ClassyFireSource	MSG
914	375-72-4	1-Butanesulfonyl fluoride, 1,1,2,2,3,3,4,4,4-nonafluoro-	1-Butanesulfonyl fluoride, nonafluoro- (6CI); 1,1,2,2,3,3,4,4,4-Nonafluoro-1-butanesulfonyl fluoride; 1,1,2,2,3,3,4,4,4-Nonafluorobutan-1-sulfonyl fluoride; 1,1,2,2,3,3,4,4,4-Nonafluorobutanesulfonyl fluoride; Nonafluoro-1-butanesulfonyl fluoride; Nonafluorobutanesulfonic acid fluoride; Nonafluorobutanesulfonyl fluoride; Nonaflyl fluoride; Perfluoro-1-butanesulfonyl fluoride; Perfluorobutan-1-sul…	C4 F10 O2 S	FC(F)(F)C(F)(F)C(F)(F)C(F)(F)S(F)(=O)=O	1219958-98-1	201	perfluoroalkane sulfonyl halides	1	4	1	1	0	0	NA	0		FC(F)(F)C(F)(F)C(F)(F)C(F)(F)S(F)(=O)=O	S(F)(=O)=O	FC(F)(F)C(F)(F)C(F)(F)C(F)F	1			4	375-72-4	FC(F)(F)C(F)(F)C(F)(F)C(F)(F)S(F)(=O)=O	LUYQYZLEHLTPBH-UHFFFAOYSA-N	Organic compounds	Organohalogen compounds	Alkyl halides	Alkyl fluorides	Perfluoroalkanesulfonyl fluorides	This compound belongs to the class of organic compounds known as perfluoroalkanesulfonyl fluorides. These are organic compounds containing an alkyl chain attached to the sulfur of an organosulfonyl fluoride group, where all hydrogens of the alkyl chain are replaced by fluorine atoms.	Aliphatic acyclic compounds	SMILES			375-72-4	CCCCS(=O)=O	LXPLOGQEBJQUJV-UHFFFAOYSA-N	Organic compounds	Organosulfur compounds	Thiols	Alkylthiols	Alkylthiols	This compound belongs to the class of organic compounds known as alkylthiols. These are organic compounds containing the thiol functional group linked to an alkyl chain.	Aliphatic acyclic compounds	SMILES
948	375-73-5	1-Butanesulfonic acid, 1,1,2,2,3,3,4,4,4-nonafluoro-	1-Butanesulfonic acid, nonafluoro- (6CI,7CI,8CI); 1,1,2,2,3,3,4,4,4-Nonafluoro-1-butanesulfonic acid; 1-Perfluorobutanesulfonic acid; Eftop FBSA; Nonafluoro-1-butanesulfonic acid; Nonafluorobutanesulfonic acid; Perfluorobutanesulfonic acid	C4 H F9 O3 S	OS(=O)(=O)C(F)(F)C(F)(F)C(F)(F)C(F)(F)F	59933-66-3, 749861-23-2	202	perfluoroalkane sulfonic acids (PFSAs), their salts and esters	1	4	1	0	0	0	NA	0		OS(=O)(=O)C(F)(F)C(F)(F)C(F)(F)C(F)(F)F	O	S(=O)(=O)C(F)(F)C(F)(F)C(F)(F)C(F)(F)F	1	S(=O)(=O)			375-73-5	OS(=O)(=O)C(F)(F)C(F)(F)C(F)(F)C(F)(F)F	JGTNAGYHADQMCM-UHFFFAOYSA-N	Organic compounds	Organohalogen compounds	Alkyl halides	Alkyl fluorides	Perfluoroalkyl sulfonic acid and derivatives	This compound belongs to the class of organic compounds known as perfluoroalkyl sulfonic acid and derivatives. These are organic compounds containing an alkyl chain attached to the sulfur of a sulfonic acid group (or a derivative thereof), where all hydrogens of the alkyl chain are replaced by fluorine atoms.	Aliphatic acyclic compounds	SMILES			375-73-5	OS(=O)(=O)CCCC	QDHFHIQKOVNCNC-UHFFFAOYSA-N	Organic compounds	Organic acids and derivatives	Organic sulfonic acids and derivatives	Organosulfonic acids and derivatives	Organosulfonic acids	This compound belongs to the class of organic compounds known as organosulfonic acids. These are compounds containing the sulfonic acid group, which has the general structure RS(=O)2OH (R is not a hydrogen atom).	Aliphatic acyclic compounds	SMILES
951	2991-84-6	1-Butanesulfonyl chloride, 1,1,2,2,3,3,4,4,4-nonafluoro-	1-Butanesulfonyl chloride, nonafluoro- (6CI); 1,1,2,2,3,3,4,4,4-Nonafluoro-1-butanesulfonyl chloride; NSC 292150; Nonafluorobutanesulfonyl chloride; Perfluorobutanesulfonyl chloride; Perfluorobutylsulfonyl chloride	C4 Cl F9 O2 S	FC(F)(F)C(F)(F)C(F)(F)C(F)(F)S(Cl)(=O)=O		201	perfluoroalkane sulfonyl halides	1	4	1	1	0	0	NA	0		FC(F)(F)C(F)(F)C(F)(F)C(F)(F)S(Cl)(=O)=O	Cl	FC(F)(F)C(F)(F)C(F)(F)C(F)(F)S(=O)=O	1	S(=O)(=O)			2991-84-6	FC(F)(F)C(F)(F)C(F)(F)C(F)(F)S(Cl)(=O)=O	IRFCLLARAUQTNK-UHFFFAOYSA-N	Organic compounds	Organohalogen compounds	Sulfonyl halides	Sulfonyl chlorides	Sulfonyl chlorides	This compound belongs to the class of organic compounds known as sulfonyl chlorides. These are compounds containing a sulfonyl (R-S(=O)2-R') functional group singly bonded to a chlorine atom.	Aliphatic acyclic compounds	SMILES			2991-84-6	CCCCS(Cl)(=O)=O	WEDIIKBPDQQQJU-UHFFFAOYSA-N	Organic compounds	Organohalogen compounds	Sulfonyl halides	Sulfonyl chlorides	Sulfonyl chlorides	This compound belongs to the class of organic compounds known as sulfonyl chlorides. These are compounds containing a sulfonyl (R-S(=O)2-R') functional group singly bonded to a chlorine atom.	Aliphatic acyclic compounds	SMILES
1126	375-81-5	1-Pentanesulfonyl fluoride, 1,1,2,2,3,3,4,4,5,5,5-undecafluoro-	1-Pentanesulfonyl fluoride, undecafluoro- (6CI); 1,1,2,2,3,3,4,4,5,5,5-Undecafluoro-1-pentanesulfonyl fluoride; Perfluoropentanesulfonyl fluoride	C5 F12 O2 S	FC(F)(F)C(F)(F)C(F)(F)C(F)(F)C(F)(F)S(F)(=O)=O		201	perfluoroalkane sulfonyl halides	1	5	1	1	0	0	NA	0		FC(F)(F)C(F)(F)C(F)(F)C(F)(F)C(F)(F)S(F)(=O)=O	S(F)(=O)=O	FC(F)(F)C(F)(F)C(F)(F)C(F)(F)C(F)F	1			4	375-81-5	FC(F)(F)C(F)(F)C(F)(F)C(F)(F)C(F)(F)S(F)(=O)=O	USAIUDWRPJQRTG-UHFFFAOYSA-N	Organic compounds	Organohalogen compounds	Alkyl halides	Alkyl fluorides	Perfluoroalkanesulfonyl fluorides	This compound belongs to the class of organic compounds known as perfluoroalkanesulfonyl fluorides. These are organic compounds containing an alkyl chain attached to the sulfur of an organosulfonyl fluoride group, where all hydrogens of the alkyl chain are replaced by fluorine atoms.	Aliphatic acyclic compounds	SMILES			375-81-5	CCCCCS(=O)=O	RYAVTAOSYLWLJI-UHFFFAOYSA-N	Organic compounds	Organosulfur compounds	Thiols	Alkylthiols	Alkylthiols	This compound belongs to the class of organic compounds known as alkylthiols. These are organic compounds containing the thiol functional group linked to an alkyl chain.	Aliphatic acyclic compounds	SMILES
1183	2706-91-4	1-Pentanesulfonic acid, 1,1,2,2,3,3,4,4,5,5,5-undecafluoro-	1-Pentanesulfonic acid, undecafluoro- (6CI,8CI); 1,1,2,2,3,3,4,4,5,5,5-Undecafluoro-1-pentanesulfonic acid; Perfluoropentanesulfonic acid; Undecafluoropentanesulfonic acid	C5 H F11 O3 S	OS(=O)(=O)C(F)(F)C(F)(F)C(F)(F)C(F)(F)C(F)(F)F		202	perfluoroalkane sulfonic acids (PFSAs), their salts and esters	1	5	1	0	0	0	NA	0		OS(=O)(=O)C(F)(F)C(F)(F)C(F)(F)C(F)(F)C(F)(F)F	O	S(=O)(=O)C(F)(F)C(F)(F)C(F)(F)C(F)(F)C(F)(F)F	1	S(=O)(=O)			2706-91-4	OS(=O)(=O)C(F)(F)C(F)(F)C(F)(F)C(F)(F)C(F)(F)F	ACEKLXZRZOWKRY-UHFFFAOYSA-N	Organic compounds	Organohalogen compounds	Alkyl halides	Alkyl fluorides	Perfluoroalkyl sulfonic acid and derivatives	This compound belongs to the class of organic compounds known as perfluoroalkyl sulfonic acid and derivatives. These are organic compounds containing an alkyl chain attached to the sulfur of a sulfonic acid group (or a derivative thereof), where all hydrogens of the alkyl chain are replaced by fluorine atoms.	Aliphatic acyclic compounds	SMILES			2706-91-4	OS(=O)(=O)CCCCC	RJQRCOMHVBLQIH-UHFFFAOYSA-N	Organic compounds	Organic acids and derivatives	Organic sulfonic acids and derivatives	Organosulfonic acids and derivatives	Organosulfonic acids	This compound belongs to the class of organic compounds known as organosulfonic acids. These are compounds containing the sulfonic acid group, which has the general structure RS(=O)2OH (R is not a hydrogen atom).	Aliphatic acyclic compounds	SMILES
1184	30334-69-1	1-Butanesulfonamide, 1,1,2,2,3,3,4,4,4-nonafluoro-	1,1,2,2,3,3,4,4,4-Nonafluoro-1-butanesulfonamide; Nonafluorobutanesulfonamide; Perfluorobutanesulfonamide; n-Nonafluorobutanesulfonamide	C4 H2 F9 N O2 S	[H]N([H])S(=O)(=O)C(F)(F)C(F)(F)C(F)(F)C(F)(F)F		203.01	perfluoroalkane sulfonyl amides/amido ethanols (xFASA/Es) and other alcohols	1	4	1	1	0	0	NA	0		[H]N([H])S(=O)(=O)C(F)(F)C(F)(F)C(F)(F)C(F)(F)F	N	S(=O)(=O)C(F)(F)C(F)(F)C(F)(F)C(F)(F)F	1	S(=O)(=O)			30334-69-1	[H]N([H])S(=O)(=O)C(F)(F)C(F)(F)C(F)(F)C(F)(F)F	FUVKFLJWBHVMHX-UHFFFAOYSA-N	Organic compounds	Organohalogen compounds	Alkyl halides	Alkyl fluorides	Perfluoroalkyl sulfonamides	This compound belongs to the class of organic compounds known as perfluoroalkyl sulfonamides. These are organic compounds containing an alkyl chain attached to the sulfur of a sulfonamide, where all hydrogens of the alkyl chain are replaced by fluorine atoms.	Aliphatic acyclic compounds	SMILES			30334-69-1	[H]N([H])S(=O)(=O)CCCC	OVIZSQRQYWEGON-UHFFFAOYSA-N	Organic compounds	Organic acids and derivatives	Organic sulfonic acids and derivatives	Organosulfonic acids and derivatives	Organosulfonamides	This compound belongs to the class of organic compounds known as organosulfonamides. These are compounds containing the sulfonamide functional group, an amide of sulfonic acid with the general structure R1S(=O)2N(R2)R3 (R1=alkyl, aryl; R2,R3=H, alkyl, aryl).	Aliphatic acyclic compounds	SMILES
1233	68555-66-8	1-Heptanesulfinic acid, 1,1,2,2,3,3,4,4,5,5,6,6,7,7,7-pentadecafluoro-, sodium salt (1:1)	1-Heptanesulfinic acid, 1,1,2,2,3,3,4,4,5,5,6,6,7,7,7-pentadecafluoro-, sodium salt (9CI)	C7 H F15 O2 S . Na	[Na+].[O-]S(=O)C(F)(F)C(F)(F)C(F)(F)C(F)(F)C(F)(F)C(F)(F)C(F)(F)F		205	perfluoroalkane sulfinic acids	1	6	1	1	0	0	NA	0	chain length of degradation products uncertain	[Na+].[O-]S(=O)C(F)(F)C(F)(F)C(F)(F)C(F)(F)C(F)(F)C(F)(F)C(F)(F)F	[O-]S=O	C(F)(F)C(F)(F)C(F)(F)C(F)(F)C(F)(F)C(F)(F)C(F)(F)F	1			4	68555-66-8	[Na+].[O-]S(=O)C(F)(F)C(F)(F)C(F)(F)C(F)(F)C(F)(F)C(F)(F)C(F)(F)F	OEIUCKZRGRKVRL-UHFFFAOYSA-M	Organic compounds	Organic acids and derivatives	Sulfinic acids and derivatives	Alkanesulfinic acids and derivatives	Alkanesulfinic acids	This compound belongs to the class of organic compounds known as alkanesulfinic acids. These are organosulfur compounds containing an aliphatic group attached to a sulfinic acid group (or a derivative thereof), with the general formula RSO2R' (R= alkyl, R'=H).	Aliphatic acyclic compounds	SMILES			68555-66-8	[Na+].[O-]S(=O)CCCCCCC	BKNHMLRSCVYXDF-UHFFFAOYSA-M	Organic compounds	Organic acids and derivatives	Sulfinic acids and derivatives	Alkanesulfinic acids and derivatives	Alkanesulfinic acids	This compound belongs to the class of organic compounds known as alkanesulfinic acids. These are organosulfur compounds containing an aliphatic group attached to a sulfinic acid group (or a derivative thereof), with the general formula RSO2R' (R= alkyl, R'=H).	Aliphatic acyclic compounds	SMILES
1235	423-50-7	1-Hexanesulfonyl fluoride, 1,1,2,2,3,3,4,4,5,5,6,6,6-tridecafluoro-	1-Hexanesulfonyl fluoride, tridecafluoro- (6CI); 1,1,2,2,3,3,4,4,5,5,6,6,6-Tridecafluoro-1-hexanesulfonyl fluoride; 1,1,2,2,3,3,4,4,5,5,6,6,6-Tridecafluorohexane-1-sulfonyl fluoride; Perfluoro-1-hexanesulfonyl fluoride; Perfluorohexanesulfonyl fluoride; Perfluorohexylsulfonyl fluoride; Tridecafluorohexanesulfonyl fluoride	C6 F14 O2 S	FC(F)(F)C(F)(F)C(F)(F)C(F)(F)C(F)(F)C(F)(F)S(F)(=O)=O		201	perfluoroalkane sulfonyl halides	1	6	1	1	0	0	NA	0		FC(F)(F)C(F)(F)C(F)(F)C(F)(F)C(F)(F)C(F)(F)S(F)(=O)=O	S(F)(=O)=O	FC(F)(F)C(F)(F)C(F)(F)C(F)(F)C(F)(F)C(F)F	1			4	423-50-7	FC(F)(F)C(F)(F)C(F)(F)C(F)(F)C(F)(F)C(F)(F)S(F)(=O)=O	HSDJWNJDPDJOEV-UHFFFAOYSA-N	Organic compounds	Organohalogen compounds	Alkyl halides	Alkyl fluorides	Perfluoroalkanesulfonyl fluorides	This compound belongs to the class of organic compounds known as perfluoroalkanesulfonyl fluorides. These are organic compounds containing an alkyl chain attached to the sulfur of an organosulfonyl fluoride group, where all hydrogens of the alkyl chain are replaced by fluorine atoms.	Aliphatic acyclic compounds	SMILES			423-50-7	CCCCCCS(=O)=O	MFXFZIRWXWEGCE-UHFFFAOYSA-N	Organic compounds	Organosulfur compounds	Thiols	Alkylthiols	Alkylthiols	This compound belongs to the class of organic compounds known as alkylthiols. These are organic compounds containing the thiol functional group linked to an alkyl chain.	Aliphatic acyclic compounds	SMILES
1262	55591-23-6	1-Hexanesulfonyl chloride, 1,1,2,2,3,3,4,4,5,5,6,6,6-tridecafluoro-	1,1,2,2,3,3,4,4,5,5,6,6,6-Tridecafluoro-1-hexanesulfonyl chloride; NSC 292151; Perfluorohexanesulfonyl chloride; Perfluorohexylsulfonyl chloride	C6 Cl F13 O2 S	FC(F)(F)C(F)(F)C(F)(F)C(F)(F)C(F)(F)C(F)(F)S(Cl)(=O)=O		201	perfluoroalkane sulfonyl halides	1	6	1	0	0	0	NA	0		FC(F)(F)C(F)(F)C(F)(F)C(F)(F)C(F)(F)C(F)(F)S(Cl)(=O)=O	Cl	FC(F)(F)C(F)(F)C(F)(F)C(F)(F)C(F)(F)C(F)(F)S(=O)=O	1	S(=O)(=O)			55591-23-6	FC(F)(F)C(F)(F)C(F)(F)C(F)(F)C(F)(F)C(F)(F)S(Cl)(=O)=O	DVRQSALCLMEVIH-UHFFFAOYSA-N	Organic compounds	Organohalogen compounds	Sulfonyl halides	Sulfonyl chlorides	Sulfonyl chlorides	This compound belongs to the class of organic compounds known as sulfonyl chlorides. These are compounds containing a sulfonyl (R-S(=O)2-R') functional group singly bonded to a chlorine atom.	Aliphatic acyclic compounds	SMILES			55591-23-6	CCCCCCS(Cl)(=O)=O	AEHJDQSLTMFLQO-UHFFFAOYSA-N	Organic compounds	Organohalogen compounds	Sulfonyl halides	Sulfonyl chlorides	Sulfonyl chlorides	This compound belongs to the class of organic compounds known as sulfonyl chlorides. These are compounds containing a sulfonyl (R-S(=O)2-R') functional group singly bonded to a chlorine atom.	Aliphatic acyclic compounds	SMILES
1265	68734-62-3	Methanesulfonic acid, 1,1-difluoro-1-(1,1,2,2,3,3,3-heptafluoropropyl)-, trimethylsilyl ester	1-Butanesulfonic acid, 1,1,2,2,3,3,4,4,4-nonafluoro-, trimethylsilyl ester (9CI); Trimethylsilyl nonaflate; Trimethylsilyl nonafluorobutanesulfonate; Trimethylsilyl perfluorobutanesulfonate	C7 H9 F9 O3 S Si	C[Si](C)(C)OS(=O)(=O)C(F)(F)C(F)(F)C(F)(F)C(F)(F)F		202	perfluoroalkane sulfonic acids (PFSAs), their salts and esters	1	4	1	1	0	0	NA	0		C[Si](C)(C)OS(=O)(=O)C(F)(F)C(F)(F)C(F)(F)C(F)(F)F	C[Si](C)(C)O	S(=O)(=O)C(F)(F)C(F)(F)C(F)(F)C(F)(F)F	1	S(=O)(=O)			68734-62-3	C[Si](C)(C)OS(=O)(=O)C(F)(F)C(F)(F)C(F)(F)C(F)(F)F	XMIPIKYUVSCYKT-UHFFFAOYSA-N	Organic compounds	Organohalogen compounds	Alkyl halides	Alkyl fluorides	Perfluoroalkyl sulfonic acid and derivatives	This compound belongs to the class of organic compounds known as perfluoroalkyl sulfonic acid and derivatives. These are organic compounds containing an alkyl chain attached to the sulfur of a sulfonic acid group (or a derivative thereof), where all hydrogens of the alkyl chain are replaced by fluorine atoms.	Aliphatic acyclic compounds	SMILES			68734-62-3	C[Si](C)(C)OS(=O)(=O)CCCC	WVVKEWRTYCYSRU-UHFFFAOYSA-N	Organic compounds	Organic acids and derivatives	Organic sulfonic acids and derivatives	Organosulfonic acids and derivatives	Organosulfonic acids and derivatives	This compound belongs to the class of organic compounds known as organosulfonic acids and derivatives. These are compounds containing a sulfonic acid or derivative, with the general structure RS(=O)2X (R=alkyl, aryl; X=any heteroatom).	Aliphatic acyclic compounds	SMILES
1303	355-46-4	1-Hexanesulfonic acid, 1,1,2,2,3,3,4,4,5,5,6,6,6-tridecafluoro-	1-Hexanesulfonic acid, tridecafluoro- (6CI,8CI); 1,1,2,2,3,3,4,4,5,5,6,6,6-Tridecafluoro-1-hexanesulfonic acid; 1,1,2,2,3,3,4,4,5,5,6,6,6-Tridecafluorohexane-1-sulfonic acid; 1-Perfluorohexanesulfonic acid; Perfluorohexanesulfonic acid; Tridecafluorohexanesulfonic acid	C6 H F13 O3 S	OS(=O)(=O)C(F)(F)C(F)(F)C(F)(F)C(F)(F)C(F)(F)C(F)(F)F		202	perfluoroalkane sulfonic acids (PFSAs), their salts and esters	1	6	1	0	0	0	NA	0		OS(=O)(=O)C(F)(F)C(F)(F)C(F)(F)C(F)(F)C(F)(F)C(F)(F)F	O	S(=O)(=O)C(F)(F)C(F)(F)C(F)(F)C(F)(F)C(F)(F)C(F)(F)F	1	S(=O)(=O)			355-46-4	OS(=O)(=O)C(F)(F)C(F)(F)C(F)(F)C(F)(F)C(F)(F)C(F)(F)F	QZHDEAJFRJCDMF-UHFFFAOYSA-N	Organic compounds	Organohalogen compounds	Alkyl halides	Alkyl fluorides	Perfluoroalkyl sulfonic acid and derivatives	This compound belongs to the class of organic compounds known as perfluoroalkyl sulfonic acid and derivatives. These are organic compounds containing an alkyl chain attached to the sulfur of a sulfonic acid group (or a derivative thereof), where all hydrogens of the alkyl chain are replaced by fluorine atoms.	Aliphatic acyclic compounds	SMILES			355-46-4	OS(=O)(=O)CCCCCC	FYAQQULBLMNGAH-UHFFFAOYSA-N	Organic compounds	Organic acids and derivatives	Organic sulfonic acids and derivatives	Organosulfonic acids and derivatives	Organosulfonic acids	This compound belongs to the class of organic compounds known as organosulfonic acids. These are compounds containing the sulfonic acid group, which has the general structure RS(=O)2OH (R is not a hydrogen atom).	Aliphatic acyclic compounds	SMILES
1309	335-71-7	1-Heptanesulfonyl fluoride, 1,1,2,2,3,3,4,4,5,5,6,6,7,7,7-pentadecafluoro-	1-Heptanesulfonyl fluoride, pentadecafluoro- (6CI,8CI); 1,1,2,2,3,3,4,4,5,5,6,6,7,7,7-Pentadecafluoro-1-heptanesulfonyl fluoride; Perfluoroheptanesulfonyl fluoride	C7 F16 O2 S	FC(F)(F)C(F)(F)C(F)(F)C(F)(F)C(F)(F)C(F)(F)C(F)(F)S(F)(=O)=O		201	perfluoroalkane sulfonyl halides	1	7	1	1	0	0	NA	0		FC(F)(F)C(F)(F)C(F)(F)C(F)(F)C(F)(F)C(F)(F)C(F)(F)S(F)(=O)=O	S(F)(=O)=O	FC(F)(F)C(F)(F)C(F)(F)C(F)(F)C(F)(F)C(F)(F)C(F)F	1			4	335-71-7	FC(F)(F)C(F)(F)C(F)(F)C(F)(F)C(F)(F)C(F)(F)C(F)(F)S(F)(=O)=O	FBIOXUYLJVKPPG-UHFFFAOYSA-N	Organic compounds	Organohalogen compounds	Alkyl halides	Alkyl fluorides	Perfluoroalkanesulfonyl fluorides	This compound belongs to the class of organic compounds known as perfluoroalkanesulfonyl fluorides. These are organic compounds containing an alkyl chain attached to the sulfur of an organosulfonyl fluoride group, where all hydrogens of the alkyl chain are replaced by fluorine atoms.	Aliphatic acyclic compounds	SMILES			335-71-7	CCCCCCCS(=O)=O	GLXMSLVPXAWHFS-UHFFFAOYSA-N	Organic compounds	Organosulfur compounds	Thiols	Alkylthiols	Alkylthiols	This compound belongs to the class of organic compounds known as alkylthiols. These are organic compounds containing the thiol functional group linked to an alkyl chain.	Aliphatic acyclic compounds	SMILES
1364	375-92-8	1-Heptanesulfonic acid, 1,1,2,2,3,3,4,4,5,5,6,6,7,7,7-pentadecafluoro-	1-Heptanesulfonic acid, pentadecafluoro- (6CI); 1,1,2,2,3,3,4,4,5,5,6,6,7,7,7-Pentadecafluoro-1-heptanesulfonic acid; 1,1,2,2,3,3,4,4,5,5,6,6,7,7,7-Pentadecafluoroheptane-1-sulfonic acid; 1-Perfluoroheptanesulfonic acid; Perfluoroheptanesulfonic acid	C7 H F15 O3 S	OS(=O)(=O)C(F)(F)C(F)(F)C(F)(F)C(F)(F)C(F)(F)C(F)(F)C(F)(F)F		202	perfluoroalkane sulfonic acids (PFSAs), their salts and esters	1	7	1	0	0	0	NA	0		OS(=O)(=O)C(F)(F)C(F)(F)C(F)(F)C(F)(F)C(F)(F)C(F)(F)C(F)(F)F	O	S(=O)(=O)C(F)(F)C(F)(F)C(F)(F)C(F)(F)C(F)(F)C(F)(F)C(F)(F)F	1	S(=O)(=O)			375-92-8	OS(=O)(=O)C(F)(F)C(F)(F)C(F)(F)C(F)(F)C(F)(F)C(F)(F)C(F)(F)F	OYGQVDSRYXATEL-UHFFFAOYSA-N	Organic compounds	Organohalogen compounds	Alkyl halides	Alkyl fluorides	Perfluoroalkyl sulfonic acid and derivatives	This compound belongs to the class of organic compounds known as perfluoroalkyl sulfonic acid and derivatives. These are organic compounds containing an alkyl chain attached to the sulfur of a sulfonic acid group (or a derivative thereof), where all hydrogens of the alkyl chain are replaced by fluorine atoms.	Aliphatic acyclic compounds	SMILES			375-92-8	OS(=O)(=O)CCCCCCC	AKRQHOWXVSDJEF-UHFFFAOYSA-N	Organic compounds	Organic acids and derivatives	Organic sulfonic acids and derivatives	Organosulfonic acids and derivatives	Organosulfonic acids	This compound belongs to the class of organic compounds known as organosulfonic acids. These are compounds containing the sulfonic acid group, which has the general structure RS(=O)2OH (R is not a hydrogen atom).	Aliphatic acyclic compounds	SMILES
1365	79963-95-4	1-Butanesulfonic acid, 1,1,2,2,3,3,4,4,4-nonafluoro-, 2,2,2-trifluoroethyl ester	1,1,2,2,3,3,4,4,4-Nonafluorobutane-1-sulfonic acid 2,2,2-trifluoroethyl ester; 2,2,2-Trifluoroethyl nonafluorobutanesulfonate	C6 H2 F12 O3 S	FC(F)(F)COS(=O)(=O)C(F)(F)C(F)(F)C(F)(F)C(F)(F)F		202	perfluoroalkane sulfonic acids (PFSAs), their salts and esters	1	4	1	1	0	0	NA	0		FC(F)(F)COS(=O)(=O)C(F)(F)C(F)(F)C(F)(F)C(F)(F)F	COS(=O)=O	FC(F)F|C(F)(F)C(F)(F)C(F)(F)C(F)(F)F	2			5.2	79963-95-4	FC(F)(F)COS(=O)(=O)C(F)(F)C(F)(F)C(F)(F)C(F)(F)F	KJGYBFLEIPDFNQ-UHFFFAOYSA-N	Organic compounds	Organohalogen compounds	Alkyl halides	Alkyl fluorides	Perfluoroalkyl sulfonic acid and derivatives	This compound belongs to the class of organic compounds known as perfluoroalkyl sulfonic acid and derivatives. These are organic compounds containing an alkyl chain attached to the sulfur of a sulfonic acid group (or a derivative thereof), where all hydrogens of the alkyl chain are replaced by fluorine atoms.	Aliphatic acyclic compounds	SMILES			79963-95-4	CCOS(=O)(=O)CCCC	VISYFZOBUOWVCA-UHFFFAOYSA-N	Organic compounds	Organic acids and derivatives	Organic sulfonic acids and derivatives	Organosulfonic acids and derivatives	Organosulfonic acid esters	This compound belongs to the class of organic compounds known as organosulfonic acid esters. These are esters of sulfonic acid, which have the general structure RS(=O)2OR' (R,R' = organyl, not H).	Aliphatic acyclic compounds	SMILES
1391	307-35-7	1-Octanesulfonyl fluoride, 1,1,2,2,3,3,4,4,5,5,6,6,7,7,8,8,8-heptadecafluoro-	1-Octanesulfonyl fluoride, heptadecafluoro- (6CI,7CI); 1,1,2,2,3,3,4,4,5,5,6,6,7,7,8,8,8-Heptadecafluoro-1-octanesulfonyl fluoride; FX 8; Fluorad FX 8; Perfluoro-1-octanesulfonyl fluoride; Perfluorooctanesulfonyl fluoride; Perfluorooctylsulfonyl fluoride; n-Perfluorooctanesulfonyl fluoride	C8 F18 O2 S	FC(F)(F)C(F)(F)C(F)(F)C(F)(F)C(F)(F)C(F)(F)C(F)(F)C(F)(F)S(F)(=O)=O		201	perfluoroalkane sulfonyl halides	1	8	1	1	0	0	NA	0		FC(F)(F)C(F)(F)C(F)(F)C(F)(F)C(F)(F)C(F)(F)C(F)(F)C(F)(F)S(F)(=O)=O	S(F)(=O)=O	FC(F)(F)C(F)(F)C(F)(F)C(F)(F)C(F)(F)C(F)(F)C(F)(F)C(F)F	1			4	307-35-7	FC(F)(F)C(F)(F)C(F)(F)C(F)(F)C(F)(F)C(F)(F)C(F)(F)C(F)(F)S(F)(=O)=O	BHFJBHMTEDLICO-UHFFFAOYSA-N	Organic compounds	Organohalogen compounds	Alkyl halides	Alkyl fluorides	Perfluoroalkanesulfonyl fluorides	This compound belongs to the class of organic compounds known as perfluoroalkanesulfonyl fluorides. These are organic compounds containing an alkyl chain attached to the sulfur of an organosulfonyl fluoride group, where all hydrogens of the alkyl chain are replaced by fluorine atoms.	Aliphatic acyclic compounds	SMILES			307-35-7	CCCCCCCCS(=O)=O	KYFCMWBFKVZWPU-UHFFFAOYSA-N	Organic compounds	Organosulfur compounds	Thiols	Alkylthiols	Alkylthiols	This compound belongs to the class of organic compounds known as alkylthiols. These are organic compounds containing the thiol functional group linked to an alkyl chain.	Aliphatic acyclic compounds	SMILES
1417	423-60-9	1-Octanesulfonyl chloride, 1,1,2,2,3,3,4,4,5,5,6,6,7,7,8,8,8-heptadecafluoro-	1-Octanesulfonyl chloride, heptadecafluoro- (6CI,7CI); 1,1,2,2,3,3,4,4,5,5,6,6,7,7,8,8,8-Heptadecafluoro-1-octanesulfonyl chloride; Heptadecafluoro-1-octanesulfonyl chloride; NSC 292152; Perfluoro-1-octanesulfonyl chloride; Perfluorooctanesulfonyl chloride; Perfluorooctylsulfonyl chloride	C8 Cl F17 O2 S	FC(F)(F)C(F)(F)C(F)(F)C(F)(F)C(F)(F)C(F)(F)C(F)(F)C(F)(F)S(Cl)(=O)=O		201	perfluoroalkane sulfonyl halides	1	8	1	1	0	0	NA	0		FC(F)(F)C(F)(F)C(F)(F)C(F)(F)C(F)(F)C(F)(F)C(F)(F)C(F)(F)S(Cl)(=O)=O	Cl	FC(F)(F)C(F)(F)C(F)(F)C(F)(F)C(F)(F)C(F)(F)C(F)(F)C(F)(F)S(=O)=O	1	S(=O)(=O)			423-60-9	FC(F)(F)C(F)(F)C(F)(F)C(F)(F)C(F)(F)C(F)(F)C(F)(F)C(F)(F)S(Cl)(=O)=O	FJHZKRYJOILIGD-UHFFFAOYSA-N	Organic compounds	Organohalogen compounds	Sulfonyl halides	Sulfonyl chlorides	Sulfonyl chlorides	This compound belongs to the class of organic compounds known as sulfonyl chlorides. These are compounds containing a sulfonyl (R-S(=O)2-R') functional group singly bonded to a chlorine atom.	Aliphatic acyclic compounds	SMILES			423-60-9	CCCCCCCCS(Cl)(=O)=O	WIVNTNLDTMNDNO-UHFFFAOYSA-N	Organic compounds	Organohalogen compounds	Sulfonyl halides	Sulfonyl chlorides	Sulfonyl chlorides	This compound belongs to the class of organic compounds known as sulfonyl chlorides. These are compounds containing a sulfonyl (R-S(=O)2-R') functional group singly bonded to a chlorine atom.	Aliphatic acyclic compounds	SMILES
1431	#VALUE!	1-Nonanesulfonyl fluoride, 1,1,2,2,3,3,4,4,5,5,6,6,7,7,8,8,9,9,9-nonadecafluoro-	1,1,2,2,3,3,4,4,5,5,6,6,7,7,8,8,9,9,9-Nonadecafluoro-1-nonanesulfonyl fluoride; Perfluorononanesulfonyl fluoride	C9 F20 O2 S	FC(F)(F)C(F)(F)C(F)(F)C(F)(F)C(F)(F)C(F)(F)C(F)(F)C(F)(F)C(F)(F)S(F)(=O)=O		201	perfluoroalkane sulfonyl halides	1	9	1	1	0	0	NA	0		FC(F)(F)C(F)(F)C(F)(F)C(F)(F)C(F)(F)C(F)(F)C(F)(F)C(F)(F)C(F)(F)S(F)(=O)=O	S(F)(=O)=O	FC(F)(F)C(F)(F)C(F)(F)C(F)(F)C(F)(F)C(F)(F)C(F)(F)C(F)(F)C(F)F	1			4	#VALUE!	FC(F)(F)C(F)(F)C(F)(F)C(F)(F)C(F)(F)C(F)(F)C(F)(F)C(F)(F)C(F)(F)S(F)(=O)=O	NBFKXQZHVNHRSB-UHFFFAOYSA-N	Organic compounds	Organohalogen compounds	Alkyl halides	Alkyl fluorides	Perfluoroalkanesulfonyl fluorides	This compound belongs to the class of organic compounds known as perfluoroalkanesulfonyl fluorides. These are organic compounds containing an alkyl chain attached to the sulfur of an organosulfonyl fluoride group, where all hydrogens of the alkyl chain are replaced by fluorine atoms.	Aliphatic acyclic compounds	SMILES			#VALUE!	CCCCCCCCCS(=O)=O	YMKSRXFVABPJAW-UHFFFAOYSA-N	Organic compounds	Organosulfur compounds	Thiols	Alkylthiols	Alkylthiols	This compound belongs to the class of organic compounds known as alkylthiols. These are organic compounds containing the thiol functional group linked to an alkyl chain.	Aliphatic acyclic compounds	SMILES
1443	1763-23-1	1-Octanesulfonic acid, 1,1,2,2,3,3,4,4,5,5,6,6,7,7,8,8,8-heptadecafluoro-	1-Octanesulfonic acid, heptadecafluoro- (6CI); 1,1,2,2,3,3,4,4,5,5,6,6,7,7,8,8,8-Heptadecafluoro-1-octanesulfonic acid; 1-Perfluorooctanesulfonic acid; EF 101; Eftop EF 101; Heptadecafluoro-1-octanesulfonic acid; Heptadecafluorooctanesulfonic acid; Perfluoro-n-octanesulfonic acid; Perfluorooctanesulfonic acid; Perfluorooctylsulfonic acid	C8 H F17 O3 S	OS(=O)(=O)C(F)(F)C(F)(F)C(F)(F)C(F)(F)C(F)(F)C(F)(F)C(F)(F)C(F)(F)F	132324-11-9	202	perfluoroalkane sulfonic acids (PFSAs), their salts and esters	1	8	1	0	0	0	NA	0		OS(=O)(=O)C(F)(F)C(F)(F)C(F)(F)C(F)(F)C(F)(F)C(F)(F)C(F)(F)C(F)(F)F	O	S(=O)(=O)C(F)(F)C(F)(F)C(F)(F)C(F)(F)C(F)(F)C(F)(F)C(F)(F)C(F)(F)F	1	S(=O)(=O)			1763-23-1	OS(=O)(=O)C(F)(F)C(F)(F)C(F)(F)C(F)(F)C(F)(F)C(F)(F)C(F)(F)C(F)(F)F	YFSUTJLHUFNCNZ-UHFFFAOYSA-N	Organic compounds	Organohalogen compounds	Alkyl halides	Alkyl fluorides	Perfluorooctane sulfonic acid and derivatives	This compound belongs to the class of organic compounds known as perfluorooctane sulfonic acid and derivatives. These are organic compounds containing an octyl chain attached to the sulfur of a sulfonic acid (or a derivative thereof), where all hydrogens of the octyl chain are replaced by fluorine atoms.	Aliphatic acyclic compounds	SMILES			1763-23-1	OS(=O)(=O)CCCCCCCC	WLGDAKIJYPIYLR-UHFFFAOYSA-N	Organic compounds	Organic acids and derivatives	Organic sulfonic acids and derivatives	Organosulfonic acids and derivatives	Organosulfonic acids	This compound belongs to the class of organic compounds known as organosulfonic acids. These are compounds containing the sulfonic acid group, which has the general structure RS(=O)2OH (R is not a hydrogen atom).	Aliphatic acyclic compounds	SMILES
1476	#VALUE!	1-Nonanesulfonic acid, 1,1,2,2,3,3,4,4,5,5,6,6,7,7,8,8,9,9,9-nonadecafluoro-	1,1,2,2,3,3,4,4,5,5,6,6,7,7,8,8,9,9,9-Nonadecafluoro-1-nonanesulfonic acid; Perfluorononanesulfonic acid	C9 H F19 O3 S	OS(=O)(=O)C(F)(F)C(F)(F)C(F)(F)C(F)(F)C(F)(F)C(F)(F)C(F)(F)C(F)(F)C(F)(F)F		202	perfluoroalkane sulfonic acids (PFSAs), their salts and esters	1	9	1	0	0	0	NA	0		OS(=O)(=O)C(F)(F)C(F)(F)C(F)(F)C(F)(F)C(F)(F)C(F)(F)C(F)(F)C(F)(F)C(F)(F)F	O	S(=O)(=O)C(F)(F)C(F)(F)C(F)(F)C(F)(F)C(F)(F)C(F)(F)C(F)(F)C(F)(F)C(F)(F)F	1	S(=O)(=O)			#VALUE!	OS(=O)(=O)C(F)(F)C(F)(F)C(F)(F)C(F)(F)C(F)(F)C(F)(F)C(F)(F)C(F)(F)C(F)(F)F	MNEXVZFQQPKDHC-UHFFFAOYSA-N	Organic compounds	Organohalogen compounds	Alkyl halides	Alkyl fluorides	Perfluoroalkyl sulfonic acid and derivatives	This compound belongs to the class of organic compounds known as perfluoroalkyl sulfonic acid and derivatives. These are organic compounds containing an alkyl chain attached to the sulfur of a sulfonic acid group (or a derivative thereof), where all hydrogens of the alkyl chain are replaced by fluorine atoms.	Aliphatic acyclic compounds	SMILES			#VALUE!	OS(=O)(=O)CCCCCCCCC	ZGAZPDWSRYNUSZ-UHFFFAOYSA-N	Organic compounds	Organic acids and derivatives	Organic sulfonic acids and derivatives	Organosulfonic acids and derivatives	Organosulfonic acids	This compound belongs to the class of organic compounds known as organosulfonic acids. These are compounds containing the sulfonic acid group, which has the general structure RS(=O)2OH (R is not a hydrogen atom).	Aliphatic acyclic compounds	SMILES
1478	307-51-7	1-Decanesulfonyl fluoride, 1,1,2,2,3,3,4,4,5,5,6,6,7,7,8,8,9,9,10,10,10-heneicosafluoro-	1-Decanesulfonyl fluoride, heneicosafluoro- (6CI,8CI); 1,1,2,2,3,3,4,4,5,5,6,6,7,7,8,8,9,9,10,10,10-Heneicosafluoro-1-decanesulfonyl fluoride; Perfluorodecanesulfonyl fluoride	C10 F22 O2 S	FC(F)(F)C(F)(F)C(F)(F)C(F)(F)C(F)(F)C(F)(F)C(F)(F)C(F)(F)C(F)(F)C(F)(F)S(F)(=O)=O		201	perfluoroalkane sulfonyl halides	1	10	1	1	0	0	NA	0		FC(F)(F)C(F)(F)C(F)(F)C(F)(F)C(F)(F)C(F)(F)C(F)(F)C(F)(F)C(F)(F)C(F)(F)S(F)(=O)=O	S(F)(=O)=O	FC(F)(F)C(F)(F)C(F)(F)C(F)(F)C(F)(F)C(F)(F)C(F)(F)C(F)(F)C(F)(F)C(F)F	1			4	307-51-7	FC(F)(F)C(F)(F)C(F)(F)C(F)(F)C(F)(F)C(F)(F)C(F)(F)C(F)(F)C(F)(F)C(F)(F)S(F)(=O)=O	QMNUYVWNQITPHA-UHFFFAOYSA-N	Organic compounds	Organohalogen compounds	Alkyl halides	Alkyl fluorides	Perfluoroalkanesulfonyl fluorides	This compound belongs to the class of organic compounds known as perfluoroalkanesulfonyl fluorides. These are organic compounds containing an alkyl chain attached to the sulfur of an organosulfonyl fluoride group, where all hydrogens of the alkyl chain are replaced by fluorine atoms.	Aliphatic acyclic compounds	SMILES			307-51-7	CCCCCCCCCCS(=O)=O	JVPKNUKQQXPINV-UHFFFAOYSA-N	Organic compounds	Organosulfur compounds	Thiols	Alkylthiols	Alkylthiols	This compound belongs to the class of organic compounds known as alkylthiols. These are organic compounds containing the thiol functional group linked to an alkyl chain.	Aliphatic acyclic compounds	SMILES
1499	41997-13-1	1-Hexanesulfonamide, 1,1,2,2,3,3,4,4,5,5,6,6,6-tridecafluoro-	1,1,2,2,3,3,4,4,5,5,6,6,6-Tridecafluoro-1-hexanesulfonamide; AI 3-10702; Perfluorohexanesulfonamide; Perfluorohexylsulfonamide; n-Perfluorohexylsulfonamide	C6 H2 F13 N O2 S	NS(=O)(=O)C(F)(F)C(F)(F)C(F)(F)C(F)(F)C(F)(F)C(F)(F)F		203.01	perfluoroalkane sulfonyl amides/amido ethanols (xFASA/Es) and other alcohols	1	6	1	1	0	0	NA	0		NS(=O)(=O)C(F)(F)C(F)(F)C(F)(F)C(F)(F)C(F)(F)C(F)(F)F	N	S(=O)(=O)C(F)(F)C(F)(F)C(F)(F)C(F)(F)C(F)(F)C(F)(F)F	1	S(=O)(=O)			41997-13-1	NS(=O)(=O)C(F)(F)C(F)(F)C(F)(F)C(F)(F)C(F)(F)C(F)(F)F	WDZLGCSJJWEQJO-UHFFFAOYSA-N	Organic compounds	Organohalogen compounds	Alkyl halides	Alkyl fluorides	Perfluoroalkyl sulfonamides	This compound belongs to the class of organic compounds known as perfluoroalkyl sulfonamides. These are organic compounds containing an alkyl chain attached to the sulfur of a sulfonamide, where all hydrogens of the alkyl chain are replaced by fluorine atoms.	Aliphatic acyclic compounds	SMILES			41997-13-1	NS(=O)(=O)CCCCCC	RMSHYQAVCSUECE-UHFFFAOYSA-N	Organic compounds	Organic acids and derivatives	Organic sulfonic acids and derivatives	Organosulfonic acids and derivatives	Organosulfonamides	This compound belongs to the class of organic compounds known as organosulfonamides. These are compounds containing the sulfonamide functional group, an amide of sulfonic acid with the general structure R1S(=O)2N(R2)R3 (R1=alkyl, aryl; R2,R3=H, alkyl, aryl).	Aliphatic acyclic compounds	SMILES
1517	335-77-3	1-Decanesulfonic acid, 1,1,2,2,3,3,4,4,5,5,6,6,7,7,8,8,9,9,10,10,10-heneicosafluoro-	1-Decanesulfonic acid, heneicosafluoro- (6CI,8CI); 1,1,2,2,3,3,4,4,5,5,6,6,7,7,8,8,9,9,10,10,10-Heneicosafluoro-1-decanesulfonic acid; 1,1,2,2,3,3,4,4,5,5,6,6,7,7,8,8,9,9,10,10,1 0-Heneicosafluorodecane-1-sulfonic acid; Perfluorodecanesulfonic acid	C10 H F21 O3 S	OS(=O)(=O)C(F)(F)C(F)(F)C(F)(F)C(F)(F)C(F)(F)C(F)(F)C(F)(F)C(F)(F)C(F)(F)C(F)(F)F		202	perfluoroalkane sulfonic acids (PFSAs), their salts and esters	1	10	1	0	0	0	NA	0		OS(=O)(=O)C(F)(F)C(F)(F)C(F)(F)C(F)(F)C(F)(F)C(F)(F)C(F)(F)C(F)(F)C(F)(F)C(F)(F)F	O	S(=O)(=O)C(F)(F)C(F)(F)C(F)(F)C(F)(F)C(F)(F)C(F)(F)C(F)(F)C(F)(F)C(F)(F)C(F)(F)F	1	S(=O)(=O)			335-77-3	OS(=O)(=O)C(F)(F)C(F)(F)C(F)(F)C(F)(F)C(F)(F)C(F)(F)C(F)(F)C(F)(F)C(F)(F)C(F)(F)F	HYWZIAVPBSTISZ-UHFFFAOYSA-N	Organic compounds	Organohalogen compounds	Alkyl halides	Alkyl fluorides	Perfluoroalkyl sulfonic acid and derivatives	This compound belongs to the class of organic compounds known as perfluoroalkyl sulfonic acid and derivatives. These are organic compounds containing an alkyl chain attached to the sulfur of a sulfonic acid group (or a derivative thereof), where all hydrogens of the alkyl chain are replaced by fluorine atoms.	Aliphatic acyclic compounds	SMILES			335-77-3	OS(=O)(=O)CCCCCCCCCC	KVGOXGQSTGQXDD-UHFFFAOYSA-N	Organic compounds	Organic acids and derivatives	Organic sulfonic acids and derivatives	Organosulfonic acids and derivatives	Organosulfonic acids	This compound belongs to the class of organic compounds known as organosulfonic acids. These are compounds containing the sulfonic acid group, which has the general structure RS(=O)2OH (R is not a hydrogen atom).	Aliphatic acyclic compounds	SMILES
1520	#VALUE!	1-Butanesulfonamide, 1,1,2,2,3,3,4,4,4-nonafluoro-N-methyl-	1,1,2,2,3,3,4,4,4-Nonafluoro-N-methyl-1-butanesulfonamide; AI 3-10704; N-(Perfluorobutylsulfonyl)-N-methylamine; N-Methylperfluorobutanesulfonamide	C5 H4 F9 N O2 S	CNS(=O)(=O)C(F)(F)C(F)(F)C(F)(F)C(F)(F)F		203.01	perfluoroalkane sulfonyl amides/amido ethanols (xFASA/Es) and other alcohols	1	4	1	1	0	0	NA	0		CNS(=O)(=O)C(F)(F)C(F)(F)C(F)(F)C(F)(F)F	CN	S(=O)(=O)C(F)(F)C(F)(F)C(F)(F)C(F)(F)F	1	S(=O)(=O)			#VALUE!	CNS(=O)(=O)C(F)(F)C(F)(F)C(F)(F)C(F)(F)F	GFZPUWKGPNHWHD-UHFFFAOYSA-N	Organic compounds	Organic acids and derivatives	Organic sulfonic acids and derivatives	Organosulfonic acids and derivatives	Organosulfonamides	This compound belongs to the class of organic compounds known as organosulfonamides. These are compounds containing the sulfonamide functional group, an amide of sulfonic acid with the general structure R1S(=O)2N(R2)R3 (R1=alkyl, aryl; R2,R3=H, alkyl, aryl).	Aliphatic acyclic compounds	SMILES			#VALUE!	CNS(=O)(=O)CCCC	CJUPBDDCEQLSBF-UHFFFAOYSA-N	Organic compounds	Organic acids and derivatives	Organic sulfonic acids and derivatives	Organosulfonic acids and derivatives	Organosulfonamides	This compound belongs to the class of organic compounds known as organosulfonamides. These are compounds containing the sulfonamide functional group, an amide of sulfonic acid with the general structure R1S(=O)2N(R2)R3 (R1=alkyl, aryl; R2,R3=H, alkyl, aryl).	Aliphatic acyclic compounds	SMILES
1594	79780-39-5	1-Dodecanesulfonic acid, 1,1,2,2,3,3,4,4,5,5,6,6,7,7,8,8,9,9,10,10,11,11,12,12,12-pentacosafluoro-	1,1,2,2,3,3,4,4,5,5,6,6,7,7,8,8,9,9,10,10,11,11,12,12,12-Pentacosafluoro-1-dodecanesulfonic acid; Perfluorododecanesulfonic acid	C12 H F25 O3 S	OS(=O)(=O)C(F)(F)C(F)(F)C(F)(F)C(F)(F)C(F)(F)C(F)(F)C(F)(F)C(F)(F)C(F)(F)C(F)(F)C(F)(F)C(F)(F)F		202	perfluoroalkane sulfonic acids (PFSAs), their salts and esters	1	12	1	0	0	0	NA	0		OS(=O)(=O)C(F)(F)C(F)(F)C(F)(F)C(F)(F)C(F)(F)C(F)(F)C(F)(F)C(F)(F)C(F)(F)C(F)(F)C(F)(F)C(F)(F)F	O	S(=O)(=O)C(F)(F)C(F)(F)C(F)(F)C(F)(F)C(F)(F)C(F)(F)C(F)(F)C(F)(F)C(F)(F)C(F)(F)C(F)(F)C(F)(F)F	1	S(=O)(=O)			79780-39-5	OS(=O)(=O)C(F)(F)C(F)(F)C(F)(F)C(F)(F)C(F)(F)C(F)(F)C(F)(F)C(F)(F)C(F)(F)C(F)(F)C(F)(F)C(F)(F)F	CFCRODHVHXGTPC-UHFFFAOYSA-N	Organic compounds	Organohalogen compounds	Alkyl halides	Alkyl fluorides	Perfluoroalkyl sulfonic acid and derivatives	This compound belongs to the class of organic compounds known as perfluoroalkyl sulfonic acid and derivatives. These are organic compounds containing an alkyl chain attached to the sulfur of a sulfonic acid group (or a derivative thereof), where all hydrogens of the alkyl chain are replaced by fluorine atoms.	Aliphatic acyclic compounds	SMILES			79780-39-5	OS(=O)(=O)CCCCCCCCCCCC	LDMOEFOXLIZJOW-UHFFFAOYSA-N	Organic compounds	Organic acids and derivatives	Organic sulfonic acids and derivatives	Organosulfonic acids and derivatives	Organosulfonic acids	This compound belongs to the class of organic compounds known as organosulfonic acids. These are compounds containing the sulfonic acid group, which has the general structure RS(=O)2OH (R is not a hydrogen atom).	Aliphatic acyclic compounds	SMILES
1608	754-91-6	1-Octanesulfonamide, 1,1,2,2,3,3,4,4,5,5,6,6,7,7,8,8,8-heptadecafluoro-	1,1,2,2,3,3,4,4,5,5,6,6,7,7,8,8,8-Heptadecafluoro-1-octanesulfonamide; AI 3-29759; Desethylsulfluramid; Perfluoroctylsulfonamide; Perfluorooctanesulfonamide; Perfluorooctanesulfonic acid amide; Perfluorooctylsulfonamide	C8 H2 F17 N O2 S	NS(=O)(=O)C(F)(F)C(F)(F)C(F)(F)C(F)(F)C(F)(F)C(F)(F)C(F)(F)C(F)(F)F		203.01	perfluoroalkane sulfonyl amides/amido ethanols (xFASA/Es) and other alcohols	1	8	1	1	0	0	NA	0		NS(=O)(=O)C(F)(F)C(F)(F)C(F)(F)C(F)(F)C(F)(F)C(F)(F)C(F)(F)C(F)(F)F	N	S(=O)(=O)C(F)(F)C(F)(F)C(F)(F)C(F)(F)C(F)(F)C(F)(F)C(F)(F)C(F)(F)F	1	S(=O)(=O)			754-91-6	NS(=O)(=O)C(F)(F)C(F)(F)C(F)(F)C(F)(F)C(F)(F)C(F)(F)C(F)(F)C(F)(F)F	RRRXPPIDPYTNJG-UHFFFAOYSA-N	Organic compounds	Organohalogen compounds	Alkyl halides	Alkyl fluorides	Perfluorooctane sulfonic acid and derivatives	This compound belongs to the class of organic compounds known as perfluorooctane sulfonic acid and derivatives. These are organic compounds containing an octyl chain attached to the sulfur of a sulfonic acid (or a derivative thereof), where all hydrogens of the octyl chain are replaced by fluorine atoms.	Aliphatic acyclic compounds	SMILES			754-91-6	NS(=O)(=O)CCCCCCCC	QWOKKHXWFDAJCZ-UHFFFAOYSA-N	Organic compounds	Organic acids and derivatives	Organic sulfonic acids and derivatives	Organosulfonic acids and derivatives	Organosulfonamides	This compound belongs to the class of organic compounds known as organosulfonamides. These are compounds containing the sulfonamide functional group, an amide of sulfonic acid with the general structure R1S(=O)2N(R2)R3 (R1=alkyl, aryl; R2,R3=H, alkyl, aryl).	Aliphatic acyclic compounds	SMILES
1625	36913-91-4	1-Butanesulfonic acid, 1,1,2,2,3,3,4,4,4-nonafluoro-, 1,1'-anhydride	1-Butanesulfonic acid, 1,1,2,2,3,3,4,4,4-nonafluoro-, anhydride (9CI); Nonafluorobutanesulfonic acid anhydride; Nonafluorobutanesulfonic anhydride; Perfluorobutanesulfonic anhydride	C8 F18 O5 S2	FC(F)(F)C(F)(F)C(F)(F)C(F)(F)S(=O)(=O)OS(=O)(=O)C(F)(F)C(F)(F)C(F)(F)C(F)(F)F		202	perfluoroalkane sulfonic acids (PFSAs), their salts and esters	1	4	1	1	0	0	NA	0		FC(F)(F)C(F)(F)C(F)(F)C(F)(F)S(=O)(=O)OS(=O)(=O)C(F)(F)C(F)(F)C(F)(F)C(F)(F)F	O	FC(F)(F)C(F)(F)C(F)(F)C(F)(F)S(=O)=O	2	S(=O)(=O)		5.3	36913-91-4	FC(F)(F)C(F)(F)C(F)(F)C(F)(F)S(=O)(=O)OS(=O)(=O)C(F)(F)C(F)(F)C(F)(F)C(F)(F)F	QKIHLPFZYGFMDK-UHFFFAOYSA-N	Organic compounds	Organohalogen compounds	Alkyl halides	Alkyl fluorides	Perfluoroalkyl sulfonic acid and derivatives	This compound belongs to the class of organic compounds known as perfluoroalkyl sulfonic acid and derivatives. These are organic compounds containing an alkyl chain attached to the sulfur of a sulfonic acid group (or a derivative thereof), where all hydrogens of the alkyl chain are replaced by fluorine atoms.	Aliphatic acyclic compounds	SMILES			36913-91-4	CCCCS(=O)(=O)OS(=O)(=O)CCCC	HXJNXHRCVBYKFI-UHFFFAOYSA-N	Organic compounds	Organic acids and derivatives	Organic sulfonic acids and derivatives	Organosulfonic acids and derivatives	Organosulfonic anhydrides	This compound belongs to the class of organic compounds known as organosulfonic anhydrides. These are organic compounds having the structure RS(=O)2OS(=O)2R', where R = organyl group and R' = H or organyl group.	Aliphatic acyclic compounds	SMILES
1662	68298-13-5	1-Pentanesulfonamide, 1,1,2,2,3,3,4,4,5,5,5-undecafluoro-N-methyl-	1,1,2,2,3,3,4,4,5,5,5-Undecafluoro-N-methyl-1-pentanesulfonamide	C6 H4 F11 N O2 S	CNS(=O)(=O)C(F)(F)C(F)(F)C(F)(F)C(F)(F)C(F)(F)F		203.01	perfluoroalkane sulfonyl amides/amido ethanols (xFASA/Es) and other alcohols	1	5	1	1	0	0	NA	0		CNS(=O)(=O)C(F)(F)C(F)(F)C(F)(F)C(F)(F)C(F)(F)F	CN	S(=O)(=O)C(F)(F)C(F)(F)C(F)(F)C(F)(F)C(F)(F)F	1	S(=O)(=O)			68298-13-5	CNS(=O)(=O)C(F)(F)C(F)(F)C(F)(F)C(F)(F)C(F)(F)F	BKKNDZBSSSAGIB-UHFFFAOYSA-N	Organic compounds	Organic acids and derivatives	Organic sulfonic acids and derivatives	Organosulfonic acids and derivatives	Organosulfonamides	This compound belongs to the class of organic compounds known as organosulfonamides. These are compounds containing the sulfonamide functional group, an amide of sulfonic acid with the general structure R1S(=O)2N(R2)R3 (R1=alkyl, aryl; R2,R3=H, alkyl, aryl).	Aliphatic acyclic compounds	SMILES			68298-13-5	CNS(=O)(=O)CCCCC	QTWCGJLLMDHYTN-UHFFFAOYSA-N	Organic compounds	Organic acids and derivatives	Organic sulfonic acids and derivatives	Organosulfonic acids and derivatives	Organosulfonamides	This compound belongs to the class of organic compounds known as organosulfonamides. These are compounds containing the sulfonamide functional group, an amide of sulfonic acid with the general structure R1S(=O)2N(R2)R3 (R1=alkyl, aryl; R2,R3=H, alkyl, aryl).	Aliphatic acyclic compounds	SMILES
1727	68259-15-4	1-Hexanesulfonamide, 1,1,2,2,3,3,4,4,5,5,6,6,6-tridecafluoro-N-methyl-	1,1,2,2,3,3,4,4,5,5,6,6,6-Tridecafluoro-N-methyl-1-hexanesulfonamide; N-Methyl-perfluorohexane-1-sulfonamide	C7 H4 F13 N O2 S	CNS(=O)(=O)C(F)(F)C(F)(F)C(F)(F)C(F)(F)C(F)(F)C(F)(F)F		203.01	perfluoroalkane sulfonyl amides/amido ethanols (xFASA/Es) and other alcohols	1	6	1	1	0	0	NA	0		CNS(=O)(=O)C(F)(F)C(F)(F)C(F)(F)C(F)(F)C(F)(F)C(F)(F)F	CN	S(=O)(=O)C(F)(F)C(F)(F)C(F)(F)C(F)(F)C(F)(F)C(F)(F)F	1	S(=O)(=O)			68259-15-4	CNS(=O)(=O)C(F)(F)C(F)(F)C(F)(F)C(F)(F)C(F)(F)C(F)(F)F	HPPDPHZGXWMRHN-UHFFFAOYSA-N	Organic compounds	Organic acids and derivatives	Organic sulfonic acids and derivatives	Organosulfonic acids and derivatives	Organosulfonamides	This compound belongs to the class of organic compounds known as organosulfonamides. These are compounds containing the sulfonamide functional group, an amide of sulfonic acid with the general structure R1S(=O)2N(R2)R3 (R1=alkyl, aryl; R2,R3=H, alkyl, aryl).	Aliphatic acyclic compounds	SMILES			68259-15-4	CNS(=O)(=O)CCCCCC	APPLCDGNMRAWSW-UHFFFAOYSA-N	Organic compounds	Organic acids and derivatives	Organic sulfonic acids and derivatives	Organosulfonic acids and derivatives	Organosulfonamides	This compound belongs to the class of organic compounds known as organosulfonamides. These are compounds containing the sulfonamide functional group, an amide of sulfonic acid with the general structure R1S(=O)2N(R2)R3 (R1=alkyl, aryl; R2,R3=H, alkyl, aryl).	Aliphatic acyclic compounds	SMILES
1753	68259-14-3	1-Heptanesulfonamide, 1,1,2,2,3,3,4,4,5,5,6,6,7,7,7-pentadecafluoro-N-methyl-	1,1,2,2,3,3,4,4,5,5,6,6,7,7,7-Pentadecafluoro-N-methyl-1-heptanesulfonamide	C8 H4 F15 N O2 S	CNS(=O)(=O)C(F)(F)C(F)(F)C(F)(F)C(F)(F)C(F)(F)C(F)(F)C(F)(F)F		203.01	perfluoroalkane sulfonyl amides/amido ethanols (xFASA/Es) and other alcohols	1	7	1	1	0	0	NA	0		CNS(=O)(=O)C(F)(F)C(F)(F)C(F)(F)C(F)(F)C(F)(F)C(F)(F)C(F)(F)F	CN	S(=O)(=O)C(F)(F)C(F)(F)C(F)(F)C(F)(F)C(F)(F)C(F)(F)C(F)(F)F	1	S(=O)(=O)			68259-14-3	CNS(=O)(=O)C(F)(F)C(F)(F)C(F)(F)C(F)(F)C(F)(F)C(F)(F)C(F)(F)F	KDHCALLFPWZTPN-UHFFFAOYSA-N	Organic compounds	Organic acids and derivatives	Organic sulfonic acids and derivatives	Organosulfonic acids and derivatives	Organosulfonamides	This compound belongs to the class of organic compounds known as organosulfonamides. These are compounds containing the sulfonamide functional group, an amide of sulfonic acid with the general structure R1S(=O)2N(R2)R3 (R1=alkyl, aryl; R2,R3=H, alkyl, aryl).	Aliphatic acyclic compounds	SMILES			68259-14-3	CNS(=O)(=O)CCCCCCC	BWLFXJJVNIMBRF-UHFFFAOYSA-N	Organic compounds	Organic acids and derivatives	Organic sulfonic acids and derivatives	Organosulfonic acids and derivatives	Organosulfonamides	This compound belongs to the class of organic compounds known as organosulfonamides. These are compounds containing the sulfonamide functional group, an amide of sulfonic acid with the general structure R1S(=O)2N(R2)R3 (R1=alkyl, aryl; R2,R3=H, alkyl, aryl).	Aliphatic acyclic compounds	SMILES
1758	34454-97-2	1-Butanesulfonamide, 1,1,2,2,3,3,4,4,4-nonafluoro-N-(2-hydroxyethyl)-N-methyl-	1,1,2,2,3,3,4,4,4-Nonafluoro-N-(2-hydroxyethyl)-N-methyl-1-butanesulfonamide; 2-(N-Methylperfluorobutanesulfamoyl)ethanol; 2-[N-(Perfluorobutylsulfonyl)-N-methylamino]ethanol; N-(2-Hydroxyethyl)-N-methyl-perfluorobutane-1-sulfonamide	C7 H8 F9 N O3 S	CN(CCO)S(=O)(=O)C(F)(F)C(F)(F)C(F)(F)C(F)(F)F		203.01	perfluoroalkane sulfonyl amides/amido ethanols (xFASA/Es) and other alcohols	1	4	1	1	0	0	NA	0		CN(CCO)S(=O)(=O)C(F)(F)C(F)(F)C(F)(F)C(F)(F)F	CNCCO	S(=O)(=O)C(F)(F)C(F)(F)C(F)(F)C(F)(F)F	1	S(=O)(=O)			34454-97-2	CN(CCO)S(=O)(=O)C(F)(F)C(F)(F)C(F)(F)C(F)(F)F	DSRUAYIFDCHEEV-UHFFFAOYSA-N	Organic compounds	Organohalogen compounds	Alkyl halides	Alkyl fluorides	Perfluoroalkane sulfonamidoethanols	This compound belongs to the class of organic compounds known as perfluoroalkane sulfonamidoethanols. These are organic compounds containing an alkyl chain attached to the sulfur of a sulfonamidoethanol group, where all hydrogens of the alkyl chain are replaced by fluorine atoms.	Aliphatic acyclic compounds	SMILES			34454-97-2	CN(CCO)S(=O)(=O)CCCC	ISEFLZJCGJXKSC-UHFFFAOYSA-N	Organic compounds	Organic acids and derivatives	Organic sulfonic acids and derivatives	Organosulfonic acids and derivatives	Organosulfonamides	This compound belongs to the class of organic compounds known as organosulfonamides. These are compounds containing the sulfonamide functional group, an amide of sulfonic acid with the general structure R1S(=O)2N(R2)R3 (R1=alkyl, aryl; R2,R3=H, alkyl, aryl).	Aliphatic acyclic compounds	SMILES
1759	39847-37-5	1-Butanesulfonamide, 1,1,2,2,3,3,4,4,4-nonafluoro-N-[(trifluoromethyl)sulfonyl]-	1,1,2,2,3,3,4,4,4-Nonafluoro-N-[(trifluoromethyl)sulfonyl]-1-butanesulfonamide; (Perfluorobutane-1-sulfonyl)(trifluoromethanesulfonyl)imide; (Perfluorobutylsulfonyl)(trifluoromethanesulfonyl)amine; N-[(Trifluoromethyl)sulfonyl]nonafluorobutanesulfonamide	C5 H F12 N O4 S2	FC(F)(F)C(F)(F)C(F)(F)C(F)(F)S(=O)(=O)NS(=O)(=O)C(F)(F)F		203.01	perfluoroalkane sulfonyl amides/amido ethanols (xFASA/Es) and other alcohols	1	4	1	1	0	0	NA	0		FC(F)(F)C(F)(F)C(F)(F)C(F)(F)S(=O)(=O)NS(=O)(=O)C(F)(F)F	N	FC(F)(F)C(F)(F)C(F)(F)C(F)(F)S(=O)=O|S(=O)(=O)C(F)(F)F	2	S(=O)(=O)		5.3	39847-37-5	FC(F)(F)C(F)(F)C(F)(F)C(F)(F)S(=O)(=O)NS(=O)(=O)C(F)(F)F	KRQOMVHYHHRBPT-UHFFFAOYSA-N	Organic compounds	Organic acids and derivatives	Organic sulfonic acids and derivatives	Organosulfonic acids and derivatives	Organosulfonic acids and derivatives	This compound belongs to the class of organic compounds known as organosulfonic acids and derivatives. These are compounds containing a sulfonic acid or derivative, with the general structure RS(=O)2X (R=alkyl, aryl; X=any heteroatom).	Aliphatic acyclic compounds	SMILES			39847-37-5	CCCCS(=O)(=O)NS(=O)(=O)C	SJTAKABXVJTYIJ-UHFFFAOYSA-N	Organic compounds	Organic acids and derivatives	Organic sulfonic acids and derivatives	Organosulfonic acids and derivatives	Organosulfonic acids and derivatives	This compound belongs to the class of organic compounds known as organosulfonic acids and derivatives. These are compounds containing a sulfonic acid or derivative, with the general structure RS(=O)2X (R=alkyl, aryl; X=any heteroatom).	Aliphatic acyclic compounds	SMILES
1761	40630-65-7	1-Butanesulfonamide, 1,1,2,2,3,3,4,4,4-nonafluoro-N-2-propen-1-yl-	1-Butanesulfonamide, 1,1,2,2,3,3,4,4,4-nonafluoro-N-2-propenyl- (9CI); 1,1,2,2,3,3,4,4,4-Nonafluoro-N-2-propen-1-yl-1-butanesulfonamide; 1,1,2,2,3,3,4,4,4-Nonafluoro-N-2-propenyl-1-butanesulfonamide; N-Allyl-1,1,2,2,3,3,4,4,4-nonafluorobutane-1-sulfonamide; N-Allylperfluorobutanesulfonamide	C7 H6 F9 N O2 S	FC(F)(F)C(F)(F)C(F)(F)C(F)(F)S(=O)(=O)NCC=C		203	perfluoroalkane sulfonyl-based nonpolymers	1	4	1	1	0	0	NA	0		FC(F)(F)C(F)(F)C(F)(F)C(F)(F)S(=O)(=O)NCC=C	NCC=C	FC(F)(F)C(F)(F)C(F)(F)C(F)(F)S(=O)=O	1	S(=O)(=O)			40630-65-7	FC(F)(F)C(F)(F)C(F)(F)C(F)(F)S(=O)(=O)NCC=C	CZDUSUUDDSHUFI-UHFFFAOYSA-N	Organic compounds	Organic acids and derivatives	Organic sulfonic acids and derivatives	Organosulfonic acids and derivatives	Organosulfonamides	This compound belongs to the class of organic compounds known as organosulfonamides. These are compounds containing the sulfonamide functional group, an amide of sulfonic acid with the general structure R1S(=O)2N(R2)R3 (R1=alkyl, aryl; R2,R3=H, alkyl, aryl).	Aliphatic acyclic compounds	SMILES			40630-65-7	CCCCS(=O)(=O)NCC=C	PDVIPSLOGRMVQI-UHFFFAOYSA-N	Organic compounds	Organic acids and derivatives	Organic sulfonic acids and derivatives	Organosulfonic acids and derivatives	Organosulfonamides	This compound belongs to the class of organic compounds known as organosulfonamides. These are compounds containing the sulfonamide functional group, an amide of sulfonic acid with the general structure R1S(=O)2N(R2)R3 (R1=alkyl, aryl; R2,R3=H, alkyl, aryl).	Aliphatic acyclic compounds	SMILES
1785	31506-32-8	1-Octanesulfonamide, 1,1,2,2,3,3,4,4,5,5,6,6,7,7,8,8,8-heptadecafluoro-N-methyl-	1,1,2,2,3,3,4,4,5,5,6,6,7,7,8,8,8-Heptadecafluoro-N-methyl-1-octanesulfonamide; 1,1,2,2,3,3,4,4,5,5,6,6,7,7,8,8,8-Heptadecafluoro-N-methyloctane-1-sulfonamide; AI 3-29758; Fluorad FX 12; N-MeFOSA; N-Methyl perfluorooctanesulphonamide; N-Methylheptadecafluorooctanesulfonamide; N-Methylperfluorooctanesulfonamide; Perfluoro-N-methyloctanesulfonamide	C9 H4 F17 N O2 S	CNS(=O)(=O)C(F)(F)C(F)(F)C(F)(F)C(F)(F)C(F)(F)C(F)(F)C(F)(F)C(F)(F)F	122526-47-0	203.01	perfluoroalkane sulfonyl amides/amido ethanols (xFASA/Es) and other alcohols	1	8	1	1	0	0	NA	0		CNS(=O)(=O)C(F)(F)C(F)(F)C(F)(F)C(F)(F)C(F)(F)C(F)(F)C(F)(F)C(F)(F)F	CN	S(=O)(=O)C(F)(F)C(F)(F)C(F)(F)C(F)(F)C(F)(F)C(F)(F)C(F)(F)C(F)(F)F	1	S(=O)(=O)			31506-32-8	CNS(=O)(=O)C(F)(F)C(F)(F)C(F)(F)C(F)(F)C(F)(F)C(F)(F)C(F)(F)C(F)(F)F	SRMWNTGHXHOWBT-UHFFFAOYSA-N	Organic compounds	Organohalogen compounds	Alkyl halides	Alkyl fluorides	Perfluorooctane sulfonic acid and derivatives	This compound belongs to the class of organic compounds known as perfluorooctane sulfonic acid and derivatives. These are organic compounds containing an octyl chain attached to the sulfur of a sulfonic acid (or a derivative thereof), where all hydrogens of the octyl chain are replaced by fluorine atoms.	Aliphatic acyclic compounds	SMILES			31506-32-8	CNS(=O)(=O)CCCCCCCC	QIMRKDBNYAFQHZ-UHFFFAOYSA-N	Organic compounds	Organic acids and derivatives	Organic sulfonic acids and derivatives	Organosulfonic acids and derivatives	Organosulfonamides	This compound belongs to the class of organic compounds known as organosulfonamides. These are compounds containing the sulfonamide functional group, an amide of sulfonic acid with the general structure R1S(=O)2N(R2)R3 (R1=alkyl, aryl; R2,R3=H, alkyl, aryl).	Aliphatic acyclic compounds	SMILES
1788	812-94-2	1-Butanesulfonamide, 1,1,2,2,3,3,4,4,4-nonafluoro-N-(4-hydroxybutyl)-N-methyl-	1,1,2,2,3,3,4,4,4-Nonafluoro-N-(4-hydroxybutyl)-N-methyl-1-butanesulfonamide; N-(4-Hydroxybutyl)-N-methylperfluorobutanesulfonamide	C9 H12 F9 N O3 S	CN(CCCCO)S(=O)(=O)C(F)(F)C(F)(F)C(F)(F)C(F)(F)F		203.01	perfluoroalkane sulfonyl amides/amido ethanols (xFASA/Es) and other alcohols	1	4	1	1	0	0	NA	0		CN(CCCCO)S(=O)(=O)C(F)(F)C(F)(F)C(F)(F)C(F)(F)F	CNCCCCO	S(=O)(=O)C(F)(F)C(F)(F)C(F)(F)C(F)(F)F	1	S(=O)(=O)			812-94-2	CN(CCCCO)S(=O)(=O)C(F)(F)C(F)(F)C(F)(F)C(F)(F)F	ZDKQQLGFDAYLPC-UHFFFAOYSA-N	Organic compounds	Organic acids and derivatives	Organic sulfonic acids and derivatives	Organosulfonic acids and derivatives	Organosulfonamides	This compound belongs to the class of organic compounds known as organosulfonamides. These are compounds containing the sulfonamide functional group, an amide of sulfonic acid with the general structure R1S(=O)2N(R2)R3 (R1=alkyl, aryl; R2,R3=H, alkyl, aryl).	Aliphatic acyclic compounds	SMILES			812-94-2	CN(CCCCO)S(=O)(=O)CCCC	RCBXPKITTUTVQE-UHFFFAOYSA-N	Organic compounds	Organic acids and derivatives	Organic sulfonic acids and derivatives	Organosulfonic acids and derivatives	Organosulfonamides	This compound belongs to the class of organic compounds known as organosulfonamides. These are compounds containing the sulfonamide functional group, an amide of sulfonic acid with the general structure R1S(=O)2N(R2)R3 (R1=alkyl, aryl; R2,R3=H, alkyl, aryl).	Aliphatic acyclic compounds	SMILES
1831	34449-89-3	1-Butanesulfonamide, N-ethyl-1,1,2,2,3,3,4,4,4-nonafluoro-N-(2-hydroxyethyl)-	N-Ethyl-1,1,2,2,3,3,4,4,4-nonafluoro-N-(2-hydroxyethyl)-1-butanesulfonamide	C8 H10 F9 N O3 S	CCN(CCO)S(=O)(=O)C(F)(F)C(F)(F)C(F)(F)C(F)(F)F		203.01	perfluoroalkane sulfonyl amides/amido ethanols (xFASA/Es) and other alcohols	1	4	1	1	0	0	NA	0		CCN(CCO)S(=O)(=O)C(F)(F)C(F)(F)C(F)(F)C(F)(F)F	CCNCCO	S(=O)(=O)C(F)(F)C(F)(F)C(F)(F)C(F)(F)F	1	S(=O)(=O)			34449-89-3	CCN(CCO)S(=O)(=O)C(F)(F)C(F)(F)C(F)(F)C(F)(F)F	ZSBOIPHQFKYRMG-UHFFFAOYSA-N	Organic compounds	Organohalogen compounds	Alkyl halides	Alkyl fluorides	Perfluoroalkane sulfonamidoethanols	This compound belongs to the class of organic compounds known as perfluoroalkane sulfonamidoethanols. These are organic compounds containing an alkyl chain attached to the sulfur of a sulfonamidoethanol group, where all hydrogens of the alkyl chain are replaced by fluorine atoms.	Aliphatic acyclic compounds	SMILES			34449-89-3	CCN(CCO)S(=O)(=O)CCCC	VGZLVJNNLWQWGV-UHFFFAOYSA-N	Organic compounds	Organic acids and derivatives	Organic sulfonic acids and derivatives	Organosulfonic acids and derivatives	Organosulfonamides	This compound belongs to the class of organic compounds known as organosulfonamides. These are compounds containing the sulfonamide functional group, an amide of sulfonic acid with the general structure R1S(=O)2N(R2)R3 (R1=alkyl, aryl; R2,R3=H, alkyl, aryl).	Aliphatic acyclic compounds	SMILES
1853	39847-39-7	1-Butanesulfonamide, 1,1,2,2,3,3,4,4,4-nonafluoro-N-[(1,1,2,2,3,3,4,4,4-nonafluorobutyl)sulfonyl]-	1-Butanesulfonamide, 1,1,2,2,3,3,4,4,4-nonafluoro-N-[(nonafluorobutyl)sulfonyl]- (9CI); 1,1,2,2,3,3,4,4,4-Nonafluoro-N-[(1,1,2,2,3,3,4,4,4-nonafluorobutyl)sulfonyl]-1-butanesulfonamide; Bis(nonafluorobutane) sulfonimide; Bis(nonafluorobutanesulfonyl)imide; Bis(nonafluorobutylsulfonyl)amine; Bis(perfluoro-1-butanesulfonyl)imide; Bis(perfluorobutanesulfonyl)amine; Bis(perfluorobutanesulfonyl)imide;…	C8 H F18 N O4 S2	[H]N(S(=O)(=O)C(F)(F)C(F)(F)C(F)(F)C(F)(F)F)S(=O)(=O)C(F)(F)C(F)(F)C(F)(F)C(F)(F)F		203	perfluoroalkane sulfonyl-based nonpolymers	1	4	1	1	0	0	NA	0		[H]N(S(=O)(=O)C(F)(F)C(F)(F)C(F)(F)C(F)(F)F)S(=O)(=O)C(F)(F)C(F)(F)C(F)(F)C(F)(F)F	N	S(=O)(=O)C(F)(F)C(F)(F)C(F)(F)C(F)(F)F	2	S(=O)(=O)		5.3	39847-39-7	[H]N(S(=O)(=O)C(F)(F)C(F)(F)C(F)(F)C(F)(F)F)S(=O)(=O)C(F)(F)C(F)(F)C(F)(F)C(F)(F)F	KZJUHXVCAHXJLR-UHFFFAOYSA-N	Organic compounds	Organic acids and derivatives	Organic sulfonic acids and derivatives	Organosulfonic acids and derivatives	Organosulfonic acids and derivatives	This compound belongs to the class of organic compounds known as organosulfonic acids and derivatives. These are compounds containing a sulfonic acid or derivative, with the general structure RS(=O)2X (R=alkyl, aryl; X=any heteroatom).	Aliphatic acyclic compounds	SMILES			39847-39-7	[H]N(S(=O)(=O)CCCC)S(=O)(=O)CCCC	USMKZCJHQPVMTB-UHFFFAOYSA-N	Organic compounds	Organic acids and derivatives	Organic sulfonic acids and derivatives	Organosulfonic acids and derivatives	Organosulfonic acids and derivatives	This compound belongs to the class of organic compounds known as organosulfonic acids and derivatives. These are compounds containing a sulfonic acid or derivative, with the general structure RS(=O)2X (R=alkyl, aryl; X=any heteroatom).	Aliphatic acyclic compounds	SMILES
1861	68957-62-0	1-Heptanesulfonamide, N-ethyl-1,1,2,2,3,3,4,4,5,5,6,6,7,7,7-pentadecafluoro-	N-Ethyl-1,1,2,2,3,3,4,4,5,5,6,6,7,7,7-pentadecafluoro-1-heptanesulfonamide	C9 H6 F15 N O2 S	CCNS(=O)(=O)C(F)(F)C(F)(F)C(F)(F)C(F)(F)C(F)(F)C(F)(F)C(F)(F)F		203.01	perfluoroalkane sulfonyl amides/amido ethanols (xFASA/Es) and other alcohols	1	7	1	1	0	0	NA	0		CCNS(=O)(=O)C(F)(F)C(F)(F)C(F)(F)C(F)(F)C(F)(F)C(F)(F)C(F)(F)F	CCN	S(=O)(=O)C(F)(F)C(F)(F)C(F)(F)C(F)(F)C(F)(F)C(F)(F)C(F)(F)F	1	S(=O)(=O)			68957-62-0	CCNS(=O)(=O)C(F)(F)C(F)(F)C(F)(F)C(F)(F)C(F)(F)C(F)(F)C(F)(F)F	WMOMXEHEPXLIAV-UHFFFAOYSA-N	Organic compounds	Organic acids and derivatives	Organic sulfonic acids and derivatives	Organosulfonic acids and derivatives	Organosulfonamides	This compound belongs to the class of organic compounds known as organosulfonamides. These are compounds containing the sulfonamide functional group, an amide of sulfonic acid with the general structure R1S(=O)2N(R2)R3 (R1=alkyl, aryl; R2,R3=H, alkyl, aryl).	Aliphatic acyclic compounds	SMILES			68957-62-0	CCNS(=O)(=O)CCCCCCC	WTIDSRYPOGGCQA-UHFFFAOYSA-N	Organic compounds	Organic acids and derivatives	Organic sulfonic acids and derivatives	Organosulfonic acids and derivatives	Organosulfonamides	This compound belongs to the class of organic compounds known as organosulfonamides. These are compounds containing the sulfonamide functional group, an amide of sulfonic acid with the general structure R1S(=O)2N(R2)R3 (R1=alkyl, aryl; R2,R3=H, alkyl, aryl).	Aliphatic acyclic compounds	SMILES
1878	34455-00-0	1-Butanesulfonamide, 1,1,2,2,3,3,4,4,4-nonafluoro-N,N-bis(2-hydroxyethyl)-	1,1,2,2,3,3,4,4,4-Nonafluoro-N,N-bis(2-hydroxyethyl)-1-butanesulfonamide; N,N-Bis(2-hydroxyethyl)perfluorobutanesulfonamide	C8 H10 F9 N O4 S	OCCN(CCO)S(=O)(=O)C(F)(F)C(F)(F)C(F)(F)C(F)(F)F		203.01	perfluoroalkane sulfonyl amides/amido ethanols (xFASA/Es) and other alcohols	0	4	1	1	0	0	NA	0		OCCN(CCO)S(=O)(=O)C(F)(F)C(F)(F)C(F)(F)C(F)(F)F	OCCNCCO	S(=O)(=O)C(F)(F)C(F)(F)C(F)(F)C(F)(F)F	1	S(=O)(=O)			34455-00-0	OCCN(CCO)S(=O)(=O)C(F)(F)C(F)(F)C(F)(F)C(F)(F)F	XYQNMGJZDSSVRP-UHFFFAOYSA-N	Organic compounds	Organic acids and derivatives	Organic sulfonic acids and derivatives	Organosulfonic acids and derivatives	Organosulfonamides	This compound belongs to the class of organic compounds known as organosulfonamides. These are compounds containing the sulfonamide functional group, an amide of sulfonic acid with the general structure R1S(=O)2N(R2)R3 (R1=alkyl, aryl; R2,R3=H, alkyl, aryl).	Aliphatic acyclic compounds	SMILES			34455-00-0	OCCN(CCO)S(=O)(=O)CCCC	SZCBMTXUFVTIRQ-UHFFFAOYSA-N	Organic compounds	Organic acids and derivatives	Organic sulfonic acids and derivatives	Organosulfonic acids and derivatives	Organosulfonamides	This compound belongs to the class of organic compounds known as organosulfonamides. These are compounds containing the sulfonamide functional group, an amide of sulfonic acid with the general structure R1S(=O)2N(R2)R3 (R1=alkyl, aryl; R2,R3=H, alkyl, aryl).	Aliphatic acyclic compounds	SMILES
1883	335-97-7	1-Pentanesulfonamide, 1,1,2,2,3,3,4,4,5,5,5-undecafluoro-N-2-propen-1-yl-	1-Pentanesulfonamide, 1,1,2,2,3,3,4,4,5,5,5-undecafluoro-N-2-propenyl- (9CI); 1-Pentanesulfonamide, N-allyl-1,1,2,2,3,3,4,4,5,5,5-undecafluoro- (6CI,8CI); 1,1,2,2,3,3,4,4,5,5,5-Undecafluoro-N-2-propen-1-yl-1-pentanesulfonamide	C8 H6 F11 N O2 S	FC(F)(F)C(F)(F)C(F)(F)C(F)(F)C(F)(F)S(=O)(=O)NCC=C		203	perfluoroalkane sulfonyl-based nonpolymers	1	5	1	1	0	0	NA	0		FC(F)(F)C(F)(F)C(F)(F)C(F)(F)C(F)(F)S(=O)(=O)NCC=C	NCC=C	FC(F)(F)C(F)(F)C(F)(F)C(F)(F)C(F)(F)S(=O)=O	1	S(=O)(=O)			335-97-7	FC(F)(F)C(F)(F)C(F)(F)C(F)(F)C(F)(F)S(=O)(=O)NCC=C	YJJPIVVOMTXOQC-UHFFFAOYSA-N	Organic compounds	Organic acids and derivatives	Organic sulfonic acids and derivatives	Organosulfonic acids and derivatives	Organosulfonamides	This compound belongs to the class of organic compounds known as organosulfonamides. These are compounds containing the sulfonamide functional group, an amide of sulfonic acid with the general structure R1S(=O)2N(R2)R3 (R1=alkyl, aryl; R2,R3=H, alkyl, aryl).	Aliphatic acyclic compounds	SMILES			335-97-7	CCCCCS(=O)(=O)NCC=C	GINSIDMLXVEHBY-UHFFFAOYSA-N	Organic compounds	Organic acids and derivatives	Organic sulfonic acids and derivatives	Organosulfonic acids and derivatives	Organosulfonamides	This compound belongs to the class of organic compounds known as organosulfonamides. These are compounds containing the sulfonamide functional group, an amide of sulfonic acid with the general structure R1S(=O)2N(R2)R3 (R1=alkyl, aryl; R2,R3=H, alkyl, aryl).	Aliphatic acyclic compounds	SMILES
1902	4151-50-2	1-Octanesulfonamide, N-ethyl-1,1,2,2,3,3,4,4,5,5,6,6,7,7,8,8,8-heptadecafluoro-	N-Ethyl-1,1,2,2,3,3,4,4,5,5,6,6,7,7,8,8,8-heptadecafluoro-1-octanesulfonamide; AI 3-29757; Alstar; Alstar (pesticide); FX 12; FiniTron; GX 071; Mirex S; N-Ethyl-1,1,2,2,3,3,4,4,5,5,6,6,7,7,8,8,8-heptadecafluorooctane-1-sulfonamide; N-Ethylperfluorooctanesulfonamide; N-Ethylperfluorooctylsulfonamide; Sulfluramid; Sulfluramide; Volcano; Volcano (insecticide)	C10 H6 F17 N O2 S	CCNS(=O)(=O)C(F)(F)C(F)(F)C(F)(F)C(F)(F)C(F)(F)C(F)(F)C(F)(F)C(F)(F)F		203.01	perfluoroalkane sulfonyl amides/amido ethanols (xFASA/Es) and other alcohols	1	8	1	1	0	0	NA	0		CCNS(=O)(=O)C(F)(F)C(F)(F)C(F)(F)C(F)(F)C(F)(F)C(F)(F)C(F)(F)C(F)(F)F	CCN	S(=O)(=O)C(F)(F)C(F)(F)C(F)(F)C(F)(F)C(F)(F)C(F)(F)C(F)(F)C(F)(F)F	1	S(=O)(=O)			4151-50-2	CCNS(=O)(=O)C(F)(F)C(F)(F)C(F)(F)C(F)(F)C(F)(F)C(F)(F)C(F)(F)C(F)(F)F	CCEKAJIANROZEO-UHFFFAOYSA-N	Organic compounds	Organohalogen compounds	Alkyl halides	Alkyl fluorides	Perfluorooctane sulfonic acid and derivatives	This compound belongs to the class of organic compounds known as perfluorooctane sulfonic acid and derivatives. These are organic compounds containing an octyl chain attached to the sulfur of a sulfonic acid (or a derivative thereof), where all hydrogens of the octyl chain are replaced by fluorine atoms.	Aliphatic acyclic compounds	SMILES			4151-50-2	CCNS(=O)(=O)CCCCCCCC	RIWZCAWOASJPBM-UHFFFAOYSA-N	Organic compounds	Organic acids and derivatives	Organic sulfonic acids and derivatives	Organosulfonic acids and derivatives	Organosulfonamides	This compound belongs to the class of organic compounds known as organosulfonamides. These are compounds containing the sulfonamide functional group, an amide of sulfonic acid with the general structure R1S(=O)2N(R2)R3 (R1=alkyl, aryl; R2,R3=H, alkyl, aryl).	Aliphatic acyclic compounds	SMILES
1907	68555-74-8	1-Pentanesulfonamide, 1,1,2,2,3,3,4,4,5,5,5-undecafluoro-N-(2-hydroxyethyl)-N-methyl-	1,1,2,2,3,3,4,4,5,5,5-Undecafluoro-N-(2-hydroxyethyl)-N-methyl-1-pentanesulfonamide	C8 H8 F11 N O3 S	CN(CCO)S(=O)(=O)C(F)(F)C(F)(F)C(F)(F)C(F)(F)C(F)(F)F		203.01	perfluoroalkane sulfonyl amides/amido ethanols (xFASA/Es) and other alcohols	1	5	1	1	0	0	NA	0		CN(CCO)S(=O)(=O)C(F)(F)C(F)(F)C(F)(F)C(F)(F)C(F)(F)F	CNCCO	S(=O)(=O)C(F)(F)C(F)(F)C(F)(F)C(F)(F)C(F)(F)F	1	S(=O)(=O)			68555-74-8	CN(CCO)S(=O)(=O)C(F)(F)C(F)(F)C(F)(F)C(F)(F)C(F)(F)F	BRBCKWCOTRPYGH-UHFFFAOYSA-N	Organic compounds	Organohalogen compounds	Alkyl halides	Alkyl fluorides	Perfluoroalkane sulfonamidoethanols	This compound belongs to the class of organic compounds known as perfluoroalkane sulfonamidoethanols. These are organic compounds containing an alkyl chain attached to the sulfur of a sulfonamidoethanol group, where all hydrogens of the alkyl chain are replaced by fluorine atoms.	Aliphatic acyclic compounds	SMILES			68555-74-8	CN(CCO)S(=O)(=O)CCCCC	OEXWJIJKRWWPQI-UHFFFAOYSA-N	Organic compounds	Organic acids and derivatives	Organic sulfonic acids and derivatives	Organosulfonic acids and derivatives	Organosulfonamides	This compound belongs to the class of organic compounds known as organosulfonamides. These are compounds containing the sulfonamide functional group, an amide of sulfonic acid with the general structure R1S(=O)2N(R2)R3 (R1=alkyl, aryl; R2,R3=H, alkyl, aryl).	Aliphatic acyclic compounds	SMILES
1930	68555-75-9	1-Hexanesulfonamide, 1,1,2,2,3,3,4,4,5,5,6,6,6-tridecafluoro-N-(2-hydroxyethyl)-N-methyl-	1,1,2,2,3,3,4,4,5,5,6,6,6-Tridecafluoro-N-(2-hydroxyethyl)-N-methyl-1-hexanesulfonamide; N-(2-Hydroxyethyl)-N-methylperfluorohexane-1-sulfonamide; N-(2-Hydroxyethyl)-N-methylperfluorohexanesulfonamide	C9 H8 F13 N O3 S	CN(CCO)S(=O)(=O)C(F)(F)C(F)(F)C(F)(F)C(F)(F)C(F)(F)C(F)(F)F		203.01	perfluoroalkane sulfonyl amides/amido ethanols (xFASA/Es) and other alcohols	1	6	1	1	0	0	NA	0		CN(CCO)S(=O)(=O)C(F)(F)C(F)(F)C(F)(F)C(F)(F)C(F)(F)C(F)(F)F	CNCCO	S(=O)(=O)C(F)(F)C(F)(F)C(F)(F)C(F)(F)C(F)(F)C(F)(F)F	1	S(=O)(=O)			68555-75-9	CN(CCO)S(=O)(=O)C(F)(F)C(F)(F)C(F)(F)C(F)(F)C(F)(F)C(F)(F)F	UYIBZOUSVFOPJK-UHFFFAOYSA-N	Organic compounds	Organohalogen compounds	Alkyl halides	Alkyl fluorides	Perfluoroalkane sulfonamidoethanols	This compound belongs to the class of organic compounds known as perfluoroalkane sulfonamidoethanols. These are organic compounds containing an alkyl chain attached to the sulfur of a sulfonamidoethanol group, where all hydrogens of the alkyl chain are replaced by fluorine atoms.	Aliphatic acyclic compounds	SMILES			68555-75-9	CN(CCO)S(=O)(=O)CCCCCC	VLJFLUONWHNXOQ-UHFFFAOYSA-N	Organic compounds	Organic acids and derivatives	Organic sulfonic acids and derivatives	Organosulfonic acids and derivatives	Organosulfonamides	This compound belongs to the class of organic compounds known as organosulfonamides. These are compounds containing the sulfonamide functional group, an amide of sulfonic acid with the general structure R1S(=O)2N(R2)R3 (R1=alkyl, aryl; R2,R3=H, alkyl, aryl).	Aliphatic acyclic compounds	SMILES
1942	68555-77-1	1-Butanesulfonamide, N-[3-(dimethylamino)propyl]-1,1,2,2,3,3,4,4,4-nonafluoro-	N-[3-(Dimethylamino)propyl]-1,1,2,2,3,3,4,4,4-nonafluoro-1-butanesulfonamide	C9 H13 F9 N2 O2 S	CN(C)CCCNS(=O)(=O)C(F)(F)C(F)(F)C(F)(F)C(F)(F)F		203	perfluoroalkane sulfonyl-based nonpolymers	1	4	1	1	0	0	NA	0		CN(C)CCCNS(=O)(=O)C(F)(F)C(F)(F)C(F)(F)C(F)(F)F	CN(C)CCCN	S(=O)(=O)C(F)(F)C(F)(F)C(F)(F)C(F)(F)F	1	S(=O)(=O)			68555-77-1	CN(C)CCCNS(=O)(=O)C(F)(F)C(F)(F)C(F)(F)C(F)(F)F	XMRMVBVJGSKMEN-UHFFFAOYSA-N	Organic compounds	Organic acids and derivatives	Organic sulfonic acids and derivatives	Organosulfonic acids and derivatives	Organosulfonamides	This compound belongs to the class of organic compounds known as organosulfonamides. These are compounds containing the sulfonamide functional group, an amide of sulfonic acid with the general structure R1S(=O)2N(R2)R3 (R1=alkyl, aryl; R2,R3=H, alkyl, aryl).	Aliphatic acyclic compounds	SMILES			68555-77-1	CN(C)CCCNS(=O)(=O)CCCC	AZCNYAIFWARNFD-UHFFFAOYSA-N	Organic compounds	Organic acids and derivatives	Organic sulfonic acids and derivatives	Organosulfonic acids and derivatives	Organosulfonamides	This compound belongs to the class of organic compounds known as organosulfonamides. These are compounds containing the sulfonamide functional group, an amide of sulfonic acid with the general structure R1S(=O)2N(R2)R3 (R1=alkyl, aryl; R2,R3=H, alkyl, aryl).	Aliphatic acyclic compounds	SMILES
1948	68555-72-6	1-Pentanesulfonamide, N-ethyl-1,1,2,2,3,3,4,4,5,5,5-undecafluoro-N-(2-hydroxyethyl)-	N-Ethyl-1,1,2,2,3,3,4,4,5,5,5-undecafluoro-N-(2-hydroxyethyl)-1-pentanesulfonamide	C9 H10 F11 N O3 S	CCN(CCO)S(=O)(=O)C(F)(F)C(F)(F)C(F)(F)C(F)(F)C(F)(F)F		203.01	perfluoroalkane sulfonyl amides/amido ethanols (xFASA/Es) and other alcohols	1	5	1	1	0	0	NA	0		CCN(CCO)S(=O)(=O)C(F)(F)C(F)(F)C(F)(F)C(F)(F)C(F)(F)F	CCNCCO	S(=O)(=O)C(F)(F)C(F)(F)C(F)(F)C(F)(F)C(F)(F)F	1	S(=O)(=O)			68555-72-6	CCN(CCO)S(=O)(=O)C(F)(F)C(F)(F)C(F)(F)C(F)(F)C(F)(F)F	GBPAQIZWHVCENQ-UHFFFAOYSA-N	Organic compounds	Organohalogen compounds	Alkyl halides	Alkyl fluorides	Perfluoroalkane sulfonamidoethanols	This compound belongs to the class of organic compounds known as perfluoroalkane sulfonamidoethanols. These are organic compounds containing an alkyl chain attached to the sulfur of a sulfonamidoethanol group, where all hydrogens of the alkyl chain are replaced by fluorine atoms.	Aliphatic acyclic compounds	SMILES			68555-72-6	CCN(CCO)S(=O)(=O)CCCCC	DNSKNPCZAOMNQH-UHFFFAOYSA-N	Organic compounds	Organic acids and derivatives	Organic sulfonic acids and derivatives	Organosulfonic acids and derivatives	Organosulfonamides	This compound belongs to the class of organic compounds known as organosulfonamides. These are compounds containing the sulfonamide functional group, an amide of sulfonic acid with the general structure R1S(=O)2N(R2)R3 (R1=alkyl, aryl; R2,R3=H, alkyl, aryl).	Aliphatic acyclic compounds	SMILES
1963	68957-59-5	1-Butanesulfonamide, N-[3-(dimethylamino)propyl]-1,1,2,2,3,3,4,4,4-nonafluoro-, hydrochloride (1:1)	1-Butanesulfonamide, N-[3-(dimethylamino)propyl]-1,1,2,2,3,3,4,4,4-nonafluoro-, monohydrochloride (9CI)	C9 H13 F9 N2 O2 S . Cl H	Cl.CN(C)CCCNS(=O)(=O)C(F)(F)C(F)(F)C(F)(F)C(F)(F)F		203	perfluoroalkane sulfonyl-based nonpolymers	1	4	1	1	0	0	NA	0		Cl.CN(C)CCCNS(=O)(=O)C(F)(F)C(F)(F)C(F)(F)C(F)(F)F	CN(C)CCCN	S(=O)(=O)C(F)(F)C(F)(F)C(F)(F)C(F)(F)F	1	S(=O)(=O)			68957-59-5	Cl.CN(C)CCCNS(=O)(=O)C(F)(F)C(F)(F)C(F)(F)C(F)(F)F	DQXUCRIDVIRDMO-UHFFFAOYSA-N	Organic compounds	Organic acids and derivatives	Organic sulfonic acids and derivatives	Organosulfonic acids and derivatives	Organosulfonamides	This compound belongs to the class of organic compounds known as organosulfonamides. These are compounds containing the sulfonamide functional group, an amide of sulfonic acid with the general structure R1S(=O)2N(R2)R3 (R1=alkyl, aryl; R2,R3=H, alkyl, aryl).	Aliphatic acyclic compounds	SMILES			68957-59-5	Cl.CN(C)CCCNS(=O)(=O)CCCC	OVOJVOLHBOGDIN-UHFFFAOYSA-N	Organic compounds	Organic acids and derivatives	Organic sulfonic acids and derivatives	Organosulfonic acids and derivatives	Organosulfonamides	This compound belongs to the class of organic compounds known as organosulfonamides. These are compounds containing the sulfonamide functional group, an amide of sulfonic acid with the general structure R1S(=O)2N(R2)R3 (R1=alkyl, aryl; R2,R3=H, alkyl, aryl).	Aliphatic acyclic compounds	SMILES
1977	#VALUE!	1-Octanesulfonamide, 1,1,2,2,3,3,4,4,5,5,6,6,7,7,8,8,8-heptadecafluoro-N-(2-hydroxyethyl)-N-methyl-	1,1,2,2,3,3,4,4,5,5,6,6,7,7,8,8,8-Heptadecafluoro-N-(2-hydroxyethyl)-N-methyl-1-octanesulfonamide; 2-(N-Methylperfluoro-1-octanesulfonamido)ethanol; MeFOSE Alcohol; N-(2-Hydroxyethyl)-N-methylperfluorooctanesulfonamide; N-MeFOSE; N-Methyl-N-ethanolperfluorooctanesulfonamide; N-Methylheptadecafluorooctanesulfonamidoethanol; N-Methylperfluorooctanesulfonamide ethyl alcohol; N-Methylperfluorooctanes…	C11 H8 F17 N O3 S	CN(CCO)S(=O)(=O)C(F)(F)C(F)(F)C(F)(F)C(F)(F)C(F)(F)C(F)(F)C(F)(F)C(F)(F)F		203.01	perfluoroalkane sulfonyl amides/amido ethanols (xFASA/Es) and other alcohols	1	8	1	1	0	0	NA	0		CN(CCO)S(=O)(=O)C(F)(F)C(F)(F)C(F)(F)C(F)(F)C(F)(F)C(F)(F)C(F)(F)C(F)(F)F	CNCCO	S(=O)(=O)C(F)(F)C(F)(F)C(F)(F)C(F)(F)C(F)(F)C(F)(F)C(F)(F)C(F)(F)F	1	S(=O)(=O)			#VALUE!	CN(CCO)S(=O)(=O)C(F)(F)C(F)(F)C(F)(F)C(F)(F)C(F)(F)C(F)(F)C(F)(F)C(F)(F)F	PLGACQRCZCVKGK-UHFFFAOYSA-N	Organic compounds	Organohalogen compounds	Alkyl halides	Alkyl fluorides	Perfluorooctane sulfonic acid and derivatives	This compound belongs to the class of organic compounds known as perfluorooctane sulfonic acid and derivatives. These are organic compounds containing an octyl chain attached to the sulfur of a sulfonic acid (or a derivative thereof), where all hydrogens of the octyl chain are replaced by fluorine atoms.	Aliphatic acyclic compounds	SMILES			#VALUE!	CN(CCO)S(=O)(=O)CCCCCCCC	PXTVXVZRPQNKOC-UHFFFAOYSA-N	Organic compounds	Organic acids and derivatives	Organic sulfonic acids and derivatives	Organosulfonic acids and derivatives	Organosulfonamides	This compound belongs to the class of organic compounds known as organosulfonamides. These are compounds containing the sulfonamide functional group, an amide of sulfonic acid with the general structure R1S(=O)2N(R2)R3 (R1=alkyl, aryl; R2,R3=H, alkyl, aryl).	Aliphatic acyclic compounds	SMILES
1983	423-86-9	1-Octanesulfonamide, 1,1,2,2,3,3,4,4,5,5,6,6,7,7,8,8,8-heptadecafluoro-N-2-propen-1-yl-	1-Octanesulfonamide, 1,1,2,2,3,3,4,4,5,5,6,6,7,7,8,8,8-heptadecafluoro-N-2-propenyl- (9CI); 1-Octanesulfonamide, N-allyl-1,1,2,2,3,3,4,4,5,5,6,6,7,7,8,8,8-heptadecafluoro- (6CI,7CI,8CI); 1,1,2,2,3,3,4,4,5,5,6,6,7,7,8,8,8-Heptadecafluoro-N-2-propen-1-yl-1-octanesulfonamide; AI 3-10710; AI 3-10711; N-Allylperfluorooctanesulfonamide	C11 H6 F17 N O2 S	FC(F)(F)C(F)(F)C(F)(F)C(F)(F)C(F)(F)C(F)(F)C(F)(F)C(F)(F)S(=O)(=O)NCC=C	99627-88-0	203	perfluoroalkane sulfonyl-based nonpolymers	1	8	1	1	0	0	NA	0		FC(F)(F)C(F)(F)C(F)(F)C(F)(F)C(F)(F)C(F)(F)C(F)(F)C(F)(F)S(=O)(=O)NCC=C	NCC=C	FC(F)(F)C(F)(F)C(F)(F)C(F)(F)C(F)(F)C(F)(F)C(F)(F)C(F)(F)S(=O)=O	1	S(=O)(=O)			423-86-9	FC(F)(F)C(F)(F)C(F)(F)C(F)(F)C(F)(F)C(F)(F)C(F)(F)C(F)(F)S(=O)(=O)NCC=C	QDPPBTYBIPLUFD-UHFFFAOYSA-N	Organic compounds	Organohalogen compounds	Alkyl halides	Alkyl fluorides	Perfluorooctane sulfonic acid and derivatives	This compound belongs to the class of organic compounds known as perfluorooctane sulfonic acid and derivatives. These are organic compounds containing an octyl chain attached to the sulfur of a sulfonic acid (or a derivative thereof), where all hydrogens of the octyl chain are replaced by fluorine atoms.	Aliphatic acyclic compounds	SMILES			423-86-9	CCCCCCCCS(=O)(=O)NCC=C	PQDIFJZEFSIJKU-UHFFFAOYSA-N	Organic compounds	Organic acids and derivatives	Organic sulfonic acids and derivatives	Organosulfonic acids and derivatives	Organosulfonamides	This compound belongs to the class of organic compounds known as organosulfonamides. These are compounds containing the sulfonamide functional group, an amide of sulfonic acid with the general structure R1S(=O)2N(R2)R3 (R1=alkyl, aryl; R2,R3=H, alkyl, aryl).	Aliphatic acyclic compounds	SMILES
1985	68957-33-5	Glycine, N-ethyl-N-[(1,1,2,2,3,3,4,4,4-nonafluorobutyl)sulfonyl]-	Glycine, N-ethyl-N-[(nonafluorobutyl)sulfonyl]- (9CI); N-Ethyl-N-[(1,1,2,2,3,3,4,4,4-nonafluorobutyl)sulfonyl]glycine	C8 H8 F9 N O4 S	CCN(CC(O)=O)S(=O)(=O)C(F)(F)C(F)(F)C(F)(F)C(F)(F)F		203.05	perfluoroalkane sulfonyl acetic acids & esters	1	4	1	1	0	0	NA	0		CCN(CC(O)=O)S(=O)(=O)C(F)(F)C(F)(F)C(F)(F)C(F)(F)F	CCNCC(O)=O	S(=O)(=O)C(F)(F)C(F)(F)C(F)(F)C(F)(F)F	1	S(=O)(=O)			68957-33-5	CCN(CC(O)=O)S(=O)(=O)C(F)(F)C(F)(F)C(F)(F)C(F)(F)F	PAOHBPWWJXVFBM-UHFFFAOYSA-N	Organic compounds	Organohalogen compounds	Alkyl halides	Alkyl fluorides	Perfluoroalkane sulfonamidoacetals	This compound belongs to the class of organic compounds known as perfluoroalkane sulfonamidoacetals. These are organic compounds containing an alkyl chain attached to the sulfur of a sulfonamidoacetal, where all hydrogens of the alkyl chain are replaced by fluorine atoms.	Aliphatic acyclic compounds	SMILES			68957-33-5	CCN(CC(O)=O)S(=O)(=O)CCCC	PZTNHPIOUIXJOP-UHFFFAOYSA-N	Organic compounds	Organic acids and derivatives	Carboxylic acids and derivatives	Amino acids, peptides, and analogues	Alpha amino acids and derivatives	This compound belongs to the class of organic compounds known as alpha amino acids and derivatives. These are amino acids in which the amino group is attached to the carbon atom immediately adjacent to the carboxylate group (alpha carbon), or a derivative thereof.	Aliphatic acyclic compounds	SMILES
1988	68555-76-0	1-Heptanesulfonamide, 1,1,2,2,3,3,4,4,5,5,6,6,7,7,7-pentadecafluoro-N-(2-hydroxyethyl)-N-methyl-	1,1,2,2,3,3,4,4,5,5,6,6,7,7,7-Pentadecafluoro-N-(2-hydroxyethyl)-N-methyl-1-heptanesulfonamide	C10 H8 F15 N O3 S	CN(CCO)S(=O)(=O)C(F)(F)C(F)(F)C(F)(F)C(F)(F)C(F)(F)C(F)(F)C(F)(F)F		203.01	perfluoroalkane sulfonyl amides/amido ethanols (xFASA/Es) and other alcohols	1	7	1	1	0	0	NA	0		CN(CCO)S(=O)(=O)C(F)(F)C(F)(F)C(F)(F)C(F)(F)C(F)(F)C(F)(F)C(F)(F)F	CNCCO	S(=O)(=O)C(F)(F)C(F)(F)C(F)(F)C(F)(F)C(F)(F)C(F)(F)C(F)(F)F	1	S(=O)(=O)			68555-76-0	CN(CCO)S(=O)(=O)C(F)(F)C(F)(F)C(F)(F)C(F)(F)C(F)(F)C(F)(F)C(F)(F)F	UIZUTEDYGNRNSW-UHFFFAOYSA-N	Organic compounds	Organohalogen compounds	Alkyl halides	Alkyl fluorides	Perfluoroalkane sulfonamidoethanols	This compound belongs to the class of organic compounds known as perfluoroalkane sulfonamidoethanols. These are organic compounds containing an alkyl chain attached to the sulfur of a sulfonamidoethanol group, where all hydrogens of the alkyl chain are replaced by fluorine atoms.	Aliphatic acyclic compounds	SMILES			68555-76-0	CN(CCO)S(=O)(=O)CCCCCCC	ZRZJTCWTDMALPX-UHFFFAOYSA-N	Organic compounds	Organic acids and derivatives	Organic sulfonic acids and derivatives	Organosulfonic acids and derivatives	Organosulfonamides	This compound belongs to the class of organic compounds known as organosulfonamides. These are compounds containing the sulfonamide functional group, an amide of sulfonic acid with the general structure R1S(=O)2N(R2)R3 (R1=alkyl, aryl; R2,R3=H, alkyl, aryl).	Aliphatic acyclic compounds	SMILES
1990	24924-36-5	1-Octanesulfonamide, N-ethyl-1,1,2,2,3,3,4,4,5,5,6,6,7,7,8,8,8-heptadecafluoro-N-2-propen-1-yl-	1-Octanesulfonamide, N-allyl-N-ethyl-1,1,2,2,3,3,4,4,5,5,6,6,7,7,8,8,8-heptadecafluoro- (8CI); 1-Octanesulfonamide, N-ethyl-1,1,2,2,3,3,4,4,5,5,6,6,7,7,8,8,8-heptadecafluoro-N-2-propenyl- (9CI); N-Ethyl-1,1,2,2,3,3,4,4,5,5,6,6,7,7,8,8,8-heptadecafluoro-N-2-propen-1-yl-1-octanesulfonamide	C13 H10 F17 N O2 S	CCN(CC=C)S(=O)(=O)C(F)(F)C(F)(F)C(F)(F)C(F)(F)C(F)(F)C(F)(F)C(F)(F)C(F)(F)F		203	perfluoroalkane sulfonyl-based nonpolymers	1	8	1	1	0	0	NA	0		CCN(CC=C)S(=O)(=O)C(F)(F)C(F)(F)C(F)(F)C(F)(F)C(F)(F)C(F)(F)C(F)(F)C(F)(F)F	CCNCC=C	S(=O)(=O)C(F)(F)C(F)(F)C(F)(F)C(F)(F)C(F)(F)C(F)(F)C(F)(F)C(F)(F)F	1	S(=O)(=O)			24924-36-5	CCN(CC=C)S(=O)(=O)C(F)(F)C(F)(F)C(F)(F)C(F)(F)C(F)(F)C(F)(F)C(F)(F)C(F)(F)F	ALIDKXPAUJUDJU-UHFFFAOYSA-N	Organic compounds	Organohalogen compounds	Alkyl halides	Alkyl fluorides	Perfluorooctane sulfonic acid and derivatives	This compound belongs to the class of organic compounds known as perfluorooctane sulfonic acid and derivatives. These are organic compounds containing an octyl chain attached to the sulfur of a sulfonic acid (or a derivative thereof), where all hydrogens of the octyl chain are replaced by fluorine atoms.	Aliphatic acyclic compounds	SMILES			24924-36-5	CCN(CC=C)S(=O)(=O)CCCCCCCC	MNSSNXHNDQORGL-UHFFFAOYSA-N	Organic compounds	Organic acids and derivatives	Organic sulfonic acids and derivatives	Organosulfonic acids and derivatives	Organosulfonamides	This compound belongs to the class of organic compounds known as organosulfonamides. These are compounds containing the sulfonamide functional group, an amide of sulfonic acid with the general structure R1S(=O)2N(R2)R3 (R1=alkyl, aryl; R2,R3=H, alkyl, aryl).	Aliphatic acyclic compounds	SMILES
2000	#VALUE!	1-Hexanesulfonamide, N-ethyl-1,1,2,2,3,3,4,4,5,5,6,6,6-tridecafluoro-N-(2-hydroxyethyl)-	N-Ethyl-1,1,2,2,3,3,4,4,5,5,6,6,6-tridecafluoro-N-(2-hydroxyethyl)-1-hexanesulfonamide; AI 3-29755	C10 H10 F13 N O3 S	CCN(CCO)S(=O)(=O)C(F)(F)C(F)(F)C(F)(F)C(F)(F)C(F)(F)C(F)(F)F		203.01	perfluoroalkane sulfonyl amides/amido ethanols (xFASA/Es) and other alcohols	1	6	1	1	0	0	NA	0		CCN(CCO)S(=O)(=O)C(F)(F)C(F)(F)C(F)(F)C(F)(F)C(F)(F)C(F)(F)F	CCNCCO	S(=O)(=O)C(F)(F)C(F)(F)C(F)(F)C(F)(F)C(F)(F)C(F)(F)F	1	S(=O)(=O)			#VALUE!	CCN(CCO)S(=O)(=O)C(F)(F)C(F)(F)C(F)(F)C(F)(F)C(F)(F)C(F)(F)F	SSGYCIQAXNQIBC-UHFFFAOYSA-N	Organic compounds	Organohalogen compounds	Alkyl halides	Alkyl fluorides	Perfluoroalkane sulfonamidoethanols	This compound belongs to the class of organic compounds known as perfluoroalkane sulfonamidoethanols. These are organic compounds containing an alkyl chain attached to the sulfur of a sulfonamidoethanol group, where all hydrogens of the alkyl chain are replaced by fluorine atoms.	Aliphatic acyclic compounds	SMILES			#VALUE!	CCN(CCO)S(=O)(=O)CCCCCC	GEZRMUWEOAYWII-UHFFFAOYSA-N	Organic compounds	Organic acids and derivatives	Organic sulfonic acids and derivatives	Organosulfonic acids and derivatives	Organosulfonamides	This compound belongs to the class of organic compounds known as organosulfonamides. These are compounds containing the sulfonamide functional group, an amide of sulfonic acid with the general structure R1S(=O)2N(R2)R3 (R1=alkyl, aryl; R2,R3=H, alkyl, aryl).	Aliphatic acyclic compounds	SMILES
2005	#VALUE!	1-Butanesulfonamide, 1,1,2,2,3,3,4,4,4-nonafluoro-N-(phenylmethyl)-	1,1,2,2,3,3,4,4,4-Nonafluoro-N-(phenylmethyl)-1-butanesulfonamide	C11 H8 F9 N O2 S	FC(F)(F)C(F)(F)C(F)(F)C(F)(F)S(=O)(=O)NCC1=CC=CC=C1		203	perfluoroalkane sulfonyl-based nonpolymers	1	4	1	1	0	0	NA	0		FC(F)(F)C(F)(F)C(F)(F)C(F)(F)S(=O)(=O)NCC1=CC=CC=C1	NCC1=CC=CC=C1	FC(F)(F)C(F)(F)C(F)(F)C(F)(F)S(=O)=O	1	S(=O)(=O)			#VALUE!	FC(F)(F)C(F)(F)C(F)(F)C(F)(F)S(=O)(=O)NCC1=CC=CC=C1	WZKSJOOHUDPYFG-UHFFFAOYSA-N	Organic compounds	Benzenoids	Benzene and substituted derivatives		Benzene and substituted derivatives	This compound belongs to the class of organic compounds known as benzene and substituted derivatives. These are aromatic compounds containing one monocyclic ring system consisting of benzene.	Aromatic homomonocyclic compounds	SMILES			#VALUE!	CCCCS(=O)(=O)NCC1=CC=CC=C1	RCHXOAOFNFHMRC-UHFFFAOYSA-N	Organic compounds	Benzenoids	Benzene and substituted derivatives		Benzene and substituted derivatives	This compound belongs to the class of organic compounds known as benzene and substituted derivatives. These are aromatic compounds containing one monocyclic ring system consisting of benzene.	Aromatic homomonocyclic compounds	SMILES
2012	68239-73-6	1-Octanesulfonamide, 1,1,2,2,3,3,4,4,5,5,6,6,7,7,8,8,8-heptadecafluoro-N-(4-hydroxybutyl)-N-methyl-	1,1,2,2,3,3,4,4,5,5,6,6,7,7,8,8,8-Heptadecafluoro-N-(4-hydroxybutyl)-N-methyl-1-octanesulfonamide; AI 3-29756	C13 H12 F17 N O3 S	CN(CCCCO)S(=O)(=O)C(F)(F)C(F)(F)C(F)(F)C(F)(F)C(F)(F)C(F)(F)C(F)(F)C(F)(F)F		203.01	perfluoroalkane sulfonyl amides/amido ethanols (xFASA/Es) and other alcohols	1	8	1	1	0	0	NA	0		CN(CCCCO)S(=O)(=O)C(F)(F)C(F)(F)C(F)(F)C(F)(F)C(F)(F)C(F)(F)C(F)(F)C(F)(F)F	CNCCCCO	S(=O)(=O)C(F)(F)C(F)(F)C(F)(F)C(F)(F)C(F)(F)C(F)(F)C(F)(F)C(F)(F)F	1	S(=O)(=O)			68239-73-6	CN(CCCCO)S(=O)(=O)C(F)(F)C(F)(F)C(F)(F)C(F)(F)C(F)(F)C(F)(F)C(F)(F)C(F)(F)F	IARCBLTVLGDOGQ-UHFFFAOYSA-N	Organic compounds	Organohalogen compounds	Alkyl halides	Alkyl fluorides	Perfluorooctane sulfonic acid and derivatives	This compound belongs to the class of organic compounds known as perfluorooctane sulfonic acid and derivatives. These are organic compounds containing an octyl chain attached to the sulfur of a sulfonic acid (or a derivative thereof), where all hydrogens of the octyl chain are replaced by fluorine atoms.	Aliphatic acyclic compounds	SMILES			68239-73-6	CN(CCCCO)S(=O)(=O)CCCCCCCC	QDMLHEDSYJWILI-UHFFFAOYSA-N	Organic compounds	Organic acids and derivatives	Organic sulfonic acids and derivatives	Organosulfonic acids and derivatives	Organosulfonamides	This compound belongs to the class of organic compounds known as organosulfonamides. These are compounds containing the sulfonamide functional group, an amide of sulfonic acid with the general structure R1S(=O)2N(R2)R3 (R1=alkyl, aryl; R2,R3=H, alkyl, aryl).	Aliphatic acyclic compounds	SMILES
2026	68555-73-7	1-Heptanesulfonamide, N-ethyl-1,1,2,2,3,3,4,4,5,5,6,6,7,7,7-pentadecafluoro-N-(2-hydroxyethyl)-	N-Ethyl-1,1,2,2,3,3,4,4,5,5,6,6,7,7,7-pentadecafluoro-N-(2-hydroxyethyl)-1-heptanesulfonamide	C11 H10 F15 N O3 S	CCN(CCO)S(=O)(=O)C(F)(F)C(F)(F)C(F)(F)C(F)(F)C(F)(F)C(F)(F)C(F)(F)F		203.01	perfluoroalkane sulfonyl amides/amido ethanols (xFASA/Es) and other alcohols	1	7	1	1	0	0	NA	0		CCN(CCO)S(=O)(=O)C(F)(F)C(F)(F)C(F)(F)C(F)(F)C(F)(F)C(F)(F)C(F)(F)F	CCNCCO	S(=O)(=O)C(F)(F)C(F)(F)C(F)(F)C(F)(F)C(F)(F)C(F)(F)C(F)(F)F	1	S(=O)(=O)			68555-73-7	CCN(CCO)S(=O)(=O)C(F)(F)C(F)(F)C(F)(F)C(F)(F)C(F)(F)C(F)(F)C(F)(F)F	HINASMOVWHGCAK-UHFFFAOYSA-N	Organic compounds	Organohalogen compounds	Alkyl halides	Alkyl fluorides	Perfluoroalkane sulfonamidoethanols	This compound belongs to the class of organic compounds known as perfluoroalkane sulfonamidoethanols. These are organic compounds containing an alkyl chain attached to the sulfur of a sulfonamidoethanol group, where all hydrogens of the alkyl chain are replaced by fluorine atoms.	Aliphatic acyclic compounds	SMILES			68555-73-7	CCN(CCO)S(=O)(=O)CCCCCCC	NVWJUYQQOZEHTB-UHFFFAOYSA-N	Organic compounds	Organic acids and derivatives	Organic sulfonic acids and derivatives	Organosulfonic acids and derivatives	Organosulfonamides	This compound belongs to the class of organic compounds known as organosulfonamides. These are compounds containing the sulfonamide functional group, an amide of sulfonic acid with the general structure R1S(=O)2N(R2)R3 (R1=alkyl, aryl; R2,R3=H, alkyl, aryl).	Aliphatic acyclic compounds	SMILES
2027	85665-64-1	1-Hexanesulfonamide, 1,1,2,2,3,3,4,4,5,5,6,6,6-tridecafluoro-N-(2-hydroxyethyl)-N-propyl-	1,1,2,2,3,3,4,4,5,5,6,6,6-Tridecafluoro-N-(2-hydroxyethyl)-N-propyl-1-hexanesulfonamide	C11 H12 F13 N O3 S	CCCN(CCO)S(=O)(=O)C(F)(F)C(F)(F)C(F)(F)C(F)(F)C(F)(F)C(F)(F)F		203.01	perfluoroalkane sulfonyl amides/amido ethanols (xFASA/Es) and other alcohols	1	6	1	1	0	0	NA	0		CCCN(CCO)S(=O)(=O)C(F)(F)C(F)(F)C(F)(F)C(F)(F)C(F)(F)C(F)(F)F	CCCNCCO	S(=O)(=O)C(F)(F)C(F)(F)C(F)(F)C(F)(F)C(F)(F)C(F)(F)F	1	S(=O)(=O)			85665-64-1	CCCN(CCO)S(=O)(=O)C(F)(F)C(F)(F)C(F)(F)C(F)(F)C(F)(F)C(F)(F)F	LTDRWTUOFBENPA-UHFFFAOYSA-N	Organic compounds	Organic acids and derivatives	Organic sulfonic acids and derivatives	Organosulfonic acids and derivatives	Organosulfonamides	This compound belongs to the class of organic compounds known as organosulfonamides. These are compounds containing the sulfonamide functional group, an amide of sulfonic acid with the general structure R1S(=O)2N(R2)R3 (R1=alkyl, aryl; R2,R3=H, alkyl, aryl).	Aliphatic acyclic compounds	SMILES			85665-64-1	CCCN(CCO)S(=O)(=O)CCCCCC	LCJMLPQMLSEZHK-UHFFFAOYSA-N	Organic compounds	Organic acids and derivatives	Organic sulfonic acids and derivatives	Organosulfonic acids and derivatives	Organosulfonamides	This compound belongs to the class of organic compounds known as organosulfonamides. These are compounds containing the sulfonamide functional group, an amide of sulfonic acid with the general structure R1S(=O)2N(R2)R3 (R1=alkyl, aryl; R2,R3=H, alkyl, aryl).	Aliphatic acyclic compounds	SMILES
2033	1691-99-2	1-Octanesulfonamide, N-ethyl-1,1,2,2,3,3,4,4,5,5,6,6,7,7,8,8,8-heptadecafluoro-N-(2-hydroxyethyl)-	N-Ethyl-1,1,2,2,3,3,4,4,5,5,6,6,7,7,8,8,8-heptadecafluoro-N-(2-hydroxyethyl)-1-octanesulfonamide; 2-(N-Ethylperfluoro-1-octanesulfonamido)ethanol; 2-Perfluorooctylsulfonyl-N-ethylaminoethyl alcohol; 2-[N-Ethyl-N-(perfluorooctylsulfonyl)amino]ethanol; AI 3-29782; FC 10; Fluorad FC 10; LE 011; N-EtFOSE; N-Ethyl-N-(2-hydroxyethyl)perfluorooctanesulfonamide; N-Ethylheptadecafluorooctanesulfonamidoeth…	C12 H10 F17 N O3 S	CCN(CCO)S(=O)(=O)C(F)(F)C(F)(F)C(F)(F)C(F)(F)C(F)(F)C(F)(F)C(F)(F)C(F)(F)F		203.01	perfluoroalkane sulfonyl amides/amido ethanols (xFASA/Es) and other alcohols	1	8	1	1	0	0	NA	0		CCN(CCO)S(=O)(=O)C(F)(F)C(F)(F)C(F)(F)C(F)(F)C(F)(F)C(F)(F)C(F)(F)C(F)(F)F	CCNCCO	S(=O)(=O)C(F)(F)C(F)(F)C(F)(F)C(F)(F)C(F)(F)C(F)(F)C(F)(F)C(F)(F)F	1	S(=O)(=O)			1691-99-2	CCN(CCO)S(=O)(=O)C(F)(F)C(F)(F)C(F)(F)C(F)(F)C(F)(F)C(F)(F)C(F)(F)C(F)(F)F	HUFHNYZNTFSKCT-UHFFFAOYSA-N	Organic compounds	Organohalogen compounds	Alkyl halides	Alkyl fluorides	Perfluorooctane sulfonic acid and derivatives	This compound belongs to the class of organic compounds known as perfluorooctane sulfonic acid and derivatives. These are organic compounds containing an octyl chain attached to the sulfur of a sulfonic acid (or a derivative thereof), where all hydrogens of the octyl chain are replaced by fluorine atoms.	Aliphatic acyclic compounds	SMILES			1691-99-2	CCN(CCO)S(=O)(=O)CCCCCCCC	FFSONPYDJPWTAE-UHFFFAOYSA-N	Organic compounds	Organic acids and derivatives	Organic sulfonic acids and derivatives	Organosulfonic acids and derivatives	Organosulfonamides	This compound belongs to the class of organic compounds known as organosulfonamides. These are compounds containing the sulfonamide functional group, an amide of sulfonic acid with the general structure R1S(=O)2N(R2)R3 (R1=alkyl, aryl; R2,R3=H, alkyl, aryl).	Aliphatic acyclic compounds	SMILES
2070	68555-78-2	1-Pentanesulfonamide, N-[3-(dimethylamino)propyl]-1,1,2,2,3,3,4,4,5,5,5-undecafluoro-	N-[3-(Dimethylamino)propyl]-1,1,2,2,3,3,4,4,5,5,5-undecafluoro-1-pentanesulfonamide	C10 H13 F11 N2 O2 S	CN(C)CCCNS(=O)(=O)C(F)(F)C(F)(F)C(F)(F)C(F)(F)C(F)(F)F		203	perfluoroalkane sulfonyl-based nonpolymers	1	5	1	1	0	0	NA	0		CN(C)CCCNS(=O)(=O)C(F)(F)C(F)(F)C(F)(F)C(F)(F)C(F)(F)F	CN(C)CCCN	S(=O)(=O)C(F)(F)C(F)(F)C(F)(F)C(F)(F)C(F)(F)F	1	S(=O)(=O)			68555-78-2	CN(C)CCCNS(=O)(=O)C(F)(F)C(F)(F)C(F)(F)C(F)(F)C(F)(F)F	VGJZPFMDBNZBTG-UHFFFAOYSA-N	Organic compounds	Organic acids and derivatives	Organic sulfonic acids and derivatives	Organosulfonic acids and derivatives	Organosulfonamides	This compound belongs to the class of organic compounds known as organosulfonamides. These are compounds containing the sulfonamide functional group, an amide of sulfonic acid with the general structure R1S(=O)2N(R2)R3 (R1=alkyl, aryl; R2,R3=H, alkyl, aryl).	Aliphatic acyclic compounds	SMILES			68555-78-2	CN(C)CCCNS(=O)(=O)CCCCC	UOKZMBDVHHDZMV-UHFFFAOYSA-N	Organic compounds	Organic acids and derivatives	Organic sulfonic acids and derivatives	Organosulfonic acids and derivatives	Organosulfonamides	This compound belongs to the class of organic compounds known as organosulfonamides. These are compounds containing the sulfonamide functional group, an amide of sulfonic acid with the general structure R1S(=O)2N(R2)R3 (R1=alkyl, aryl; R2,R3=H, alkyl, aryl).	Aliphatic acyclic compounds	SMILES
2073	4236-15-1	1-Octanesulfonamide, 1,1,2,2,3,3,4,4,5,5,6,6,7,7,8,8,8-heptadecafluoro-N-(2-hydroxyethyl)-N-propyl-	1,1,2,2,3,3,4,4,5,5,6,6,7,7,8,8,8-Heptadecafluoro-N-(2-hydroxyethyl)-N-propyl-1-octanesulfonamide; Eftop EF 121; Megafac F 104; N-(2-Hydroxyethyl)-N-propylperfluorooctanesulfonamide; N-Propyl-N-(2-hydroxyethyl)perfluorooctanesulfonamide	C13 H12 F17 N O3 S	CCCN(CCO)S(=O)(=O)C(F)(F)C(F)(F)C(F)(F)C(F)(F)C(F)(F)C(F)(F)C(F)(F)C(F)(F)F	101239-38-7, 115165-75-8	203.01	perfluoroalkane sulfonyl amides/amido ethanols (xFASA/Es) and other alcohols	1	8	1	1	0	0	NA	0		CCCN(CCO)S(=O)(=O)C(F)(F)C(F)(F)C(F)(F)C(F)(F)C(F)(F)C(F)(F)C(F)(F)C(F)(F)F	CCCNCCO	S(=O)(=O)C(F)(F)C(F)(F)C(F)(F)C(F)(F)C(F)(F)C(F)(F)C(F)(F)C(F)(F)F	1	S(=O)(=O)			4236-15-1	CCCN(CCO)S(=O)(=O)C(F)(F)C(F)(F)C(F)(F)C(F)(F)C(F)(F)C(F)(F)C(F)(F)C(F)(F)F	NSAFUDAPGVUPIP-UHFFFAOYSA-N	Organic compounds	Organohalogen compounds	Alkyl halides	Alkyl fluorides	Perfluorooctane sulfonic acid and derivatives	This compound belongs to the class of organic compounds known as perfluorooctane sulfonic acid and derivatives. These are organic compounds containing an octyl chain attached to the sulfur of a sulfonic acid (or a derivative thereof), where all hydrogens of the octyl chain are replaced by fluorine atoms.	Aliphatic acyclic compounds	SMILES			4236-15-1	CCCN(CCO)S(=O)(=O)CCCCCCCC	NRDFJMHRKGTIKN-UHFFFAOYSA-N	Organic compounds	Organic acids and derivatives	Organic sulfonic acids and derivatives	Organosulfonic acids and derivatives	Organosulfonamides	This compound belongs to the class of organic compounds known as organosulfonamides. These are compounds containing the sulfonamide functional group, an amide of sulfonic acid with the general structure R1S(=O)2N(R2)R3 (R1=alkyl, aryl; R2,R3=H, alkyl, aryl).	Aliphatic acyclic compounds	SMILES
2074	40630-61-3	1-Octanesulfonamide, 1,1,2,2,3,3,4,4,5,5,6,6,7,7,8,8,8-heptadecafluoro-N,N-bis(2-hydroxyethyl)-	1,1,2,2,3,3,4,4,5,5,6,6,7,7,8,8,8-Heptadecafluoro-N,N-bis(2-hydroxyethyl)-1-octanesulfonamide; N,N-Bis(2-hydroxyethyl)perfluorooctanesulfonamide; N,N-Di(hydroxyethyl)perfluorooctane sulfonamide; Perfluorooctanesulfonic acid diethanolamide	C12 H10 F17 N O4 S	OCCN(CCO)S(=O)(=O)C(F)(F)C(F)(F)C(F)(F)C(F)(F)C(F)(F)C(F)(F)C(F)(F)C(F)(F)F		203.01	perfluoroalkane sulfonyl amides/amido ethanols (xFASA/Es) and other alcohols	0	8	1	1	0	0	NA	0		OCCN(CCO)S(=O)(=O)C(F)(F)C(F)(F)C(F)(F)C(F)(F)C(F)(F)C(F)(F)C(F)(F)C(F)(F)F	OCCNCCO	S(=O)(=O)C(F)(F)C(F)(F)C(F)(F)C(F)(F)C(F)(F)C(F)(F)C(F)(F)C(F)(F)F	1	S(=O)(=O)			40630-61-3	OCCN(CCO)S(=O)(=O)C(F)(F)C(F)(F)C(F)(F)C(F)(F)C(F)(F)C(F)(F)C(F)(F)C(F)(F)F	SSTHBHCRNGPPAI-UHFFFAOYSA-N	Organic compounds	Organohalogen compounds	Alkyl halides	Alkyl fluorides	Perfluorooctane sulfonic acid and derivatives	This compound belongs to the class of organic compounds known as perfluorooctane sulfonic acid and derivatives. These are organic compounds containing an octyl chain attached to the sulfur of a sulfonic acid (or a derivative thereof), where all hydrogens of the octyl chain are replaced by fluorine atoms.	Aliphatic acyclic compounds	SMILES			40630-61-3	OCCN(CCO)S(=O)(=O)CCCCCCCC	RGIHZBYYWXGBSM-UHFFFAOYSA-N	Organic compounds	Organic acids and derivatives	Organic sulfonic acids and derivatives	Organosulfonic acids and derivatives	Organosulfonamides	This compound belongs to the class of organic compounds known as organosulfonamides. These are compounds containing the sulfonamide functional group, an amide of sulfonic acid with the general structure R1S(=O)2N(R2)R3 (R1=alkyl, aryl; R2,R3=H, alkyl, aryl).	Aliphatic acyclic compounds	SMILES
2081	68957-31-3	Glycine, N-ethyl-N-[(1,1,2,2,3,3,4,4,5,5,5-undecafluoropentyl)sulfonyl]-	Glycine, N-ethyl-N-[(undecafluoropentyl)sulfonyl]- (9CI); N-Ethyl-N-[(1,1,2,2,3,3,4,4,5,5,5-undecafluoropentyl)sulfonyl]glycine	C9 H8 F11 N O4 S	CCN(CC(O)=O)S(=O)(=O)C(F)(F)C(F)(F)C(F)(F)C(F)(F)C(F)(F)F		203.05	perfluoroalkane sulfonyl acetic acids & esters	1	5	1	1	0	0	NA	0		CCN(CC(O)=O)S(=O)(=O)C(F)(F)C(F)(F)C(F)(F)C(F)(F)C(F)(F)F	CCNCC(O)=O	S(=O)(=O)C(F)(F)C(F)(F)C(F)(F)C(F)(F)C(F)(F)F	1	S(=O)(=O)			68957-31-3	CCN(CC(O)=O)S(=O)(=O)C(F)(F)C(F)(F)C(F)(F)C(F)(F)C(F)(F)F	MJELJHFNXRAPHF-UHFFFAOYSA-N	Organic compounds	Organohalogen compounds	Alkyl halides	Alkyl fluorides	Perfluoroalkane sulfonamidoacetals	This compound belongs to the class of organic compounds known as perfluoroalkane sulfonamidoacetals. These are organic compounds containing an alkyl chain attached to the sulfur of a sulfonamidoacetal, where all hydrogens of the alkyl chain are replaced by fluorine atoms.	Aliphatic acyclic compounds	SMILES			68957-31-3	CCN(CC(O)=O)S(=O)(=O)CCCCC	PXVDVQTWYCNFPT-UHFFFAOYSA-N	Organic compounds	Organic acids and derivatives	Carboxylic acids and derivatives	Amino acids, peptides, and analogues	Alpha amino acids and derivatives	This compound belongs to the class of organic compounds known as alpha amino acids and derivatives. These are amino acids in which the amino group is attached to the carbon atom immediately adjacent to the carboxylate group (alpha carbon), or a derivative thereof.	Aliphatic acyclic compounds	SMILES
2085	50598-28-2	1-Hexanesulfonamide, N-[3-(dimethylamino)propyl]-1,1,2,2,3,3,4,4,5,5,6,6,6-tridecafluoro-	N-[3-(Dimethylamino)propyl]-1,1,2,2,3,3,4,4,5,5,6,6,6-tridecafluoro-1-hexanesulfonamide	C11 H13 F13 N2 O2 S	CN(C)CCCNS(=O)(=O)C(F)(F)C(F)(F)C(F)(F)C(F)(F)C(F)(F)C(F)(F)F		203	perfluoroalkane sulfonyl-based nonpolymers	1	6	1	1	0	0	NA	0		CN(C)CCCNS(=O)(=O)C(F)(F)C(F)(F)C(F)(F)C(F)(F)C(F)(F)C(F)(F)F	CN(C)CCCN	S(=O)(=O)C(F)(F)C(F)(F)C(F)(F)C(F)(F)C(F)(F)C(F)(F)F	1	S(=O)(=O)			50598-28-2	CN(C)CCCNS(=O)(=O)C(F)(F)C(F)(F)C(F)(F)C(F)(F)C(F)(F)C(F)(F)F	INDOGKYZYLAGEM-UHFFFAOYSA-N	Organic compounds	Organic acids and derivatives	Organic sulfonic acids and derivatives	Organosulfonic acids and derivatives	Organosulfonamides	This compound belongs to the class of organic compounds known as organosulfonamides. These are compounds containing the sulfonamide functional group, an amide of sulfonic acid with the general structure R1S(=O)2N(R2)R3 (R1=alkyl, aryl; R2,R3=H, alkyl, aryl).	Aliphatic acyclic compounds	SMILES			50598-28-2	CN(C)CCCNS(=O)(=O)CCCCCC	CZNLFYYVTBPVFJ-UHFFFAOYSA-N	Organic compounds	Organic acids and derivatives	Organic sulfonic acids and derivatives	Organosulfonic acids and derivatives	Organosulfonamides	This compound belongs to the class of organic compounds known as organosulfonamides. These are compounds containing the sulfonamide functional group, an amide of sulfonic acid with the general structure R1S(=O)2N(R2)R3 (R1=alkyl, aryl; R2,R3=H, alkyl, aryl).	Aliphatic acyclic compounds	SMILES
2096	132831	1-Octanesulfonamide, N-butyl-1,1,2,2,3,3,4,4,5,5,6,6,7,7,8,8,8-heptadecafluoro-N-(2-hydroxyethyl)-	N-Butyl-1,1,2,2,3,3,4,4,5,5,6,6,7,7,8,8,8-heptadecafluoro-N-(2-hydroxyethyl)-1-octanesulfonamide; AI 3-29754; N-Butyl-N-(2-hydroxyethyl)perfluorooctanesulfonamide; N-Butyl-N-ethanolperfluorooctanesulfonamide; N-Butylperfluorooctanesulphonamido ethyl alcohol	C14 H14 F17 N O3 S	CCCCN(CCO)S(=O)(=O)C(F)(F)C(F)(F)C(F)(F)C(F)(F)C(F)(F)C(F)(F)C(F)(F)C(F)(F)F		203.01	perfluoroalkane sulfonyl amides/amido ethanols (xFASA/Es) and other alcohols	1	8	1	1	0	0	NA	0		CCCCN(CCO)S(=O)(=O)C(F)(F)C(F)(F)C(F)(F)C(F)(F)C(F)(F)C(F)(F)C(F)(F)C(F)(F)F	CCCCNCCO	S(=O)(=O)C(F)(F)C(F)(F)C(F)(F)C(F)(F)C(F)(F)C(F)(F)C(F)(F)C(F)(F)F	1	S(=O)(=O)			132831	CCCCN(CCO)S(=O)(=O)C(F)(F)C(F)(F)C(F)(F)C(F)(F)C(F)(F)C(F)(F)C(F)(F)C(F)(F)F	AQWROZBAYZBWIH-UHFFFAOYSA-N	Organic compounds	Organohalogen compounds	Alkyl halides	Alkyl fluorides	Perfluorooctane sulfonic acid and derivatives	This compound belongs to the class of organic compounds known as perfluorooctane sulfonic acid and derivatives. These are organic compounds containing an octyl chain attached to the sulfur of a sulfonic acid (or a derivative thereof), where all hydrogens of the octyl chain are replaced by fluorine atoms.	Aliphatic acyclic compounds	SMILES			132831	CCCCN(CCO)S(=O)(=O)CCCCCCCC	YUZPPCBUOSZZFJ-UHFFFAOYSA-N	Organic compounds	Organic acids and derivatives	Organic sulfonic acids and derivatives	Organosulfonic acids and derivatives	Organosulfonamides	This compound belongs to the class of organic compounds known as organosulfonamides. These are compounds containing the sulfonamide functional group, an amide of sulfonic acid with the general structure R1S(=O)2N(R2)R3 (R1=alkyl, aryl; R2,R3=H, alkyl, aryl).	Aliphatic acyclic compounds	SMILES
2102	67939-42-8	1-Octanesulfonamide, N-ethyl-1,1,2,2,3,3,4,4,5,5,6,6,7,7,8,8,8-heptadecafluoro-N-[3-(trichlorosilyl)propyl]-	N-Ethyl-1,1,2,2,3,3,4,4,5,5,6,6,7,7,8,8,8-heptadecafluoro-N-[3-(trichlorosilyl)propyl]-1-octanesulfonamide	C13 H11 Cl3 F17 N O2 S Si	CCN(CCC[Si](Cl)(Cl)Cl)S(=O)(=O)C(F)(F)C(F)(F)C(F)(F)C(F)(F)C(F)(F)C(F)(F)C(F)(F)C(F)(F)F		203.04	perfluoroalkane sulfonyl silanes	1	8	1	1	0	0	NA	0		CCN(CCC[Si](Cl)(Cl)Cl)S(=O)(=O)C(F)(F)C(F)(F)C(F)(F)C(F)(F)C(F)(F)C(F)(F)C(F)(F)C(F)(F)F	CCNCCC[Si](Cl)(Cl)Cl	S(=O)(=O)C(F)(F)C(F)(F)C(F)(F)C(F)(F)C(F)(F)C(F)(F)C(F)(F)C(F)(F)F	1	S(=O)(=O)			67939-42-8	CCN(CCC[Si](Cl)(Cl)Cl)S(=O)(=O)C(F)(F)C(F)(F)C(F)(F)C(F)(F)C(F)(F)C(F)(F)C(F)(F)C(F)(F)F	XTDOBWSCKYKWCE-UHFFFAOYSA-N	Organic compounds	Organohalogen compounds	Alkyl halides	Alkyl fluorides	Perfluorooctane sulfonic acid and derivatives	This compound belongs to the class of organic compounds known as perfluorooctane sulfonic acid and derivatives. These are organic compounds containing an octyl chain attached to the sulfur of a sulfonic acid (or a derivative thereof), where all hydrogens of the octyl chain are replaced by fluorine atoms.	Aliphatic acyclic compounds	SMILES			67939-42-8	CCN(CCC[Si](Cl)(Cl)Cl)S(=O)(=O)CCCCCCCC	MBKGTLXMDZUEOP-UHFFFAOYSA-N	Organic compounds	Organic acids and derivatives	Organic sulfonic acids and derivatives	Organosulfonic acids and derivatives	Organosulfonamides	This compound belongs to the class of organic compounds known as organosulfonamides. These are compounds containing the sulfonamide functional group, an amide of sulfonic acid with the general structure R1S(=O)2N(R2)R3 (R1=alkyl, aryl; R2,R3=H, alkyl, aryl).	Aliphatic acyclic compounds	SMILES
2117	68239-75-8	1-Heptanesulfonamide, N-ethyl-1,1,2,2,3,3,4,4,5,5,6,6,7,7,7-pentadecafluoro-N-[3-(trimethoxysilyl)propyl]-	N-Ethyl-1,1,2,2,3,3,4,4,5,5,6,6,7,7,7-pentadecafluoro-N-[3-(trimethoxysilyl)propyl]-1-heptanesulfonamide	C15 H20 F15 N O5 S Si	CCN(CCC[Si](OC)(OC)OC)S(=O)(=O)C(F)(F)C(F)(F)C(F)(F)C(F)(F)C(F)(F)C(F)(F)C(F)(F)F		203.04	perfluoroalkane sulfonyl silanes	1	7	1	1	0	0	NA	0		CCN(CCC[Si](OC)(OC)OC)S(=O)(=O)C(F)(F)C(F)(F)C(F)(F)C(F)(F)C(F)(F)C(F)(F)C(F)(F)F	CCNCCC[Si](OC)(OC)OC	S(=O)(=O)C(F)(F)C(F)(F)C(F)(F)C(F)(F)C(F)(F)C(F)(F)C(F)(F)F	1	S(=O)(=O)			68239-75-8	CCN(CCC[Si](OC)(OC)OC)S(=O)(=O)C(F)(F)C(F)(F)C(F)(F)C(F)(F)C(F)(F)C(F)(F)C(F)(F)F	SKFXNBMYNHVVJU-UHFFFAOYSA-N	Organic compounds	Organometallic compounds	Organometalloid compounds	Organosilicon compounds	Trialkoxysilanes	This compound belongs to the class of organic compounds known as trialkoxysilanes. These are organosilicon compounds with the general formula RO[Si](R')(OR'')OR''' (R-R''' = aliphatic organyl group).	Aliphatic acyclic compounds	SMILES			68239-75-8	CCN(CCC[Si](OC)(OC)OC)S(=O)(=O)CCCCCCC	UHQMJBMYAJQLND-UHFFFAOYSA-N	Organic compounds	Organometallic compounds	Organometalloid compounds	Organosilicon compounds	Trialkoxysilanes	This compound belongs to the class of organic compounds known as trialkoxysilanes. These are organosilicon compounds with the general formula RO[Si](R')(OR'')OR''' (R-R''' = aliphatic organyl group).	Aliphatic acyclic compounds	SMILES
2124	68957-32-4	Glycine, N-ethyl-N-[(1,1,2,2,3,3,4,4,5,5,6,6,6-tridecafluorohexyl)sulfonyl]-	Glycine, N-ethyl-N-[(tridecafluorohexyl)sulfonyl]- (9CI); N-Ethyl-N-[(1,1,2,2,3,3,4,4,5,5,6,6,6-tridecafluorohexyl)sulfonyl]glycine	C10 H8 F13 N O4 S	CCN(CC(O)=O)S(=O)(=O)C(F)(F)C(F)(F)C(F)(F)C(F)(F)C(F)(F)C(F)(F)F		203.05	perfluoroalkane sulfonyl acetic acids & esters	1	6	1	1	0	0	NA	0		CCN(CC(O)=O)S(=O)(=O)C(F)(F)C(F)(F)C(F)(F)C(F)(F)C(F)(F)C(F)(F)F	CCNCC(O)=O	S(=O)(=O)C(F)(F)C(F)(F)C(F)(F)C(F)(F)C(F)(F)C(F)(F)F	1	S(=O)(=O)			68957-32-4	CCN(CC(O)=O)S(=O)(=O)C(F)(F)C(F)(F)C(F)(F)C(F)(F)C(F)(F)C(F)(F)F	ISFCQODURJEALJ-UHFFFAOYSA-N	Organic compounds	Organohalogen compounds	Alkyl halides	Alkyl fluorides	Perfluoroalkane sulfonamidoacetals	This compound belongs to the class of organic compounds known as perfluoroalkane sulfonamidoacetals. These are organic compounds containing an alkyl chain attached to the sulfur of a sulfonamidoacetal, where all hydrogens of the alkyl chain are replaced by fluorine atoms.	Aliphatic acyclic compounds	SMILES			68957-32-4	CCN(CC(O)=O)S(=O)(=O)CCCCCC	NHFHMGXDMHDCPD-UHFFFAOYSA-N	Organic compounds	Organic acids and derivatives	Carboxylic acids and derivatives	Amino acids, peptides, and analogues	Alpha amino acids and derivatives	This compound belongs to the class of organic compounds known as alpha amino acids and derivatives. These are amino acids in which the amino group is attached to the carbon atom immediately adjacent to the carboxylate group (alpha carbon), or a derivative thereof.	Aliphatic acyclic compounds	SMILES
2125	67584-54-7	1-Heptanesulfonamide, N-[3-(dimethylamino)propyl]-1,1,2,2,3,3,4,4,5,5,6,6,7,7,7-pentadecafluoro-	N-[3-(Dimethylamino)propyl]-1,1,2,2,3,3,4,4,5,5,6,6,7,7,7-pentadecafluoro-1-heptanesulfonamide	C12 H13 F15 N2 O2 S	CN(C)CCCNS(=O)(=O)C(F)(F)C(F)(F)C(F)(F)C(F)(F)C(F)(F)C(F)(F)C(F)(F)F		203	perfluoroalkane sulfonyl-based nonpolymers	1	7	1	1	0	0	NA	0		CN(C)CCCNS(=O)(=O)C(F)(F)C(F)(F)C(F)(F)C(F)(F)C(F)(F)C(F)(F)C(F)(F)F	CN(C)CCCN	S(=O)(=O)C(F)(F)C(F)(F)C(F)(F)C(F)(F)C(F)(F)C(F)(F)C(F)(F)F	1	S(=O)(=O)			67584-54-7	CN(C)CCCNS(=O)(=O)C(F)(F)C(F)(F)C(F)(F)C(F)(F)C(F)(F)C(F)(F)C(F)(F)F	RFJQYRXZGNILIY-UHFFFAOYSA-N	Organic compounds	Organic acids and derivatives	Organic sulfonic acids and derivatives	Organosulfonic acids and derivatives	Organosulfonamides	This compound belongs to the class of organic compounds known as organosulfonamides. These are compounds containing the sulfonamide functional group, an amide of sulfonic acid with the general structure R1S(=O)2N(R2)R3 (R1=alkyl, aryl; R2,R3=H, alkyl, aryl).	Aliphatic acyclic compounds	SMILES			67584-54-7	CN(C)CCCNS(=O)(=O)CCCCCCC	WCHPUNFODLAMSB-UHFFFAOYSA-N	Organic compounds	Organic acids and derivatives	Organic sulfonic acids and derivatives	Organosulfonic acids and derivatives	Organosulfonamides	This compound belongs to the class of organic compounds known as organosulfonamides. These are compounds containing the sulfonamide functional group, an amide of sulfonic acid with the general structure R1S(=O)2N(R2)R3 (R1=alkyl, aryl; R2,R3=H, alkyl, aryl).	Aliphatic acyclic compounds	SMILES
2128	#VALUE!	1-Octanesulfonamide, N-ethyl-1,1,2,2,3,3,4,4,5,5,6,6,7,7,8,8,8-heptadecafluoro-N-[3-(trimethoxysilyl)propyl]-	N-Ethyl-1,1,2,2,3,3,4,4,5,5,6,6,7,7,8,8,8-heptadecafluoro-N-[3-(trimethoxysilyl)propyl]-1-octanesulfonamide; FC 405; L 12833; MF 160E	C16 H20 F17 N O5 S Si	CCN(CCC[Si](OC)(OC)OC)S(=O)(=O)C(F)(F)C(F)(F)C(F)(F)C(F)(F)C(F)(F)C(F)(F)C(F)(F)C(F)(F)F		203.04	perfluoroalkane sulfonyl silanes	1	8	1	1	0	0	NA	0		CCN(CCC[Si](OC)(OC)OC)S(=O)(=O)C(F)(F)C(F)(F)C(F)(F)C(F)(F)C(F)(F)C(F)(F)C(F)(F)C(F)(F)F	CCNCCC[Si](OC)(OC)OC	S(=O)(=O)C(F)(F)C(F)(F)C(F)(F)C(F)(F)C(F)(F)C(F)(F)C(F)(F)C(F)(F)F	1	S(=O)(=O)			#VALUE!	CCN(CCC[Si](OC)(OC)OC)S(=O)(=O)C(F)(F)C(F)(F)C(F)(F)C(F)(F)C(F)(F)C(F)(F)C(F)(F)C(F)(F)F	BFSVEUJCJYGSKA-UHFFFAOYSA-N	Organic compounds	Organohalogen compounds	Alkyl halides	Alkyl fluorides	Perfluorooctane sulfonic acid and derivatives	This compound belongs to the class of organic compounds known as perfluorooctane sulfonic acid and derivatives. These are organic compounds containing an octyl chain attached to the sulfur of a sulfonic acid (or a derivative thereof), where all hydrogens of the octyl chain are replaced by fluorine atoms.	Aliphatic acyclic compounds	SMILES			#VALUE!	CCN(CCC[Si](OC)(OC)OC)S(=O)(=O)CCCCCCCC	KRYMPDNCBSHSRL-UHFFFAOYSA-N	Organic compounds	Organometallic compounds	Organometalloid compounds	Organosilicon compounds	Trialkoxysilanes	This compound belongs to the class of organic compounds known as trialkoxysilanes. These are organosilicon compounds with the general formula RO[Si](R')(OR'')OR''' (R-R''' = aliphatic organyl group).	Aliphatic acyclic compounds	SMILES
2129	#VALUE!	1-Octanesulfonamide, N-[3-(dimethylamino)propyl]-1,1,2,2,3,3,4,4,5,5,6,6,7,7,8,8,8-heptadecafluoro-	N-[3-(Dimethylamino)propyl]-1,1,2,2,3,3,4,4,5,5,6,6,7,7,8,8,8-heptadecafluoro-1-octanesulfonamide; N-[3-(Dimethylamino)propyl]perfluorooctylsulfonamide	C13 H13 F17 N2 O2 S	CN(C)CCCNS(=O)(=O)C(F)(F)C(F)(F)C(F)(F)C(F)(F)C(F)(F)C(F)(F)C(F)(F)C(F)(F)F		203	perfluoroalkane sulfonyl-based nonpolymers	1	8	1	1	0	0	NA	0		CN(C)CCCNS(=O)(=O)C(F)(F)C(F)(F)C(F)(F)C(F)(F)C(F)(F)C(F)(F)C(F)(F)C(F)(F)F	CN(C)CCCN	S(=O)(=O)C(F)(F)C(F)(F)C(F)(F)C(F)(F)C(F)(F)C(F)(F)C(F)(F)C(F)(F)F	1	S(=O)(=O)			#VALUE!	CN(C)CCCNS(=O)(=O)C(F)(F)C(F)(F)C(F)(F)C(F)(F)C(F)(F)C(F)(F)C(F)(F)C(F)(F)F	MSJXTBMNRCTIDR-UHFFFAOYSA-N	Organic compounds	Organohalogen compounds	Alkyl halides	Alkyl fluorides	Perfluorooctane sulfonic acid and derivatives	This compound belongs to the class of organic compounds known as perfluorooctane sulfonic acid and derivatives. These are organic compounds containing an octyl chain attached to the sulfur of a sulfonic acid (or a derivative thereof), where all hydrogens of the octyl chain are replaced by fluorine atoms.	Aliphatic acyclic compounds	SMILES			#VALUE!	CN(C)CCCNS(=O)(=O)CCCCCCCC	NWCZQKGRVRYNQN-UHFFFAOYSA-N	Organic compounds	Organic acids and derivatives	Organic sulfonic acids and derivatives	Organosulfonic acids and derivatives	Organosulfonamides	This compound belongs to the class of organic compounds known as organosulfonamides. These are compounds containing the sulfonamide functional group, an amide of sulfonic acid with the general structure R1S(=O)2N(R2)R3 (R1=alkyl, aryl; R2,R3=H, alkyl, aryl).	Aliphatic acyclic compounds	SMILES
2134	1492-87-1	2-Propenoic acid, 4-[methyl[(1,1,2,2,3,3,4,4,4-nonafluorobutyl)sulfonyl]amino]butyl ester	1-Butanesulfonamide, 1,1,2,2,3,3,4,4,4-nonafluoro-N-(4-hydroxybutyl)-N-methyl-, acrylate (ester) (8CI); 1-Butanesulfonamide, 1,1,2,2,3,3,4,4,4-nonafluoro-N-4-hydroxybutyl-N-methyl-, acrylate (6CI); 2-Propenoic acid, 4-[methyl[(nonafluorobutyl)sulfonyl]amino]butyl ester (9CI)	C12 H14 F9 N O4 S	CN(CCCCOC(=O)C=C)S(=O)(=O)C(F)(F)C(F)(F)C(F)(F)C(F)(F)F		203	perfluoroalkane sulfonyl-based nonpolymers	1	4	1	1	0	0	NA	0		CN(CCCCOC(=O)C=C)S(=O)(=O)C(F)(F)C(F)(F)C(F)(F)C(F)(F)F	CNCCCCOC(=O)C=C	S(=O)(=O)C(F)(F)C(F)(F)C(F)(F)C(F)(F)F	1	S(=O)(=O)			1492-87-1	CN(CCCCOC(=O)C=C)S(=O)(=O)C(F)(F)C(F)(F)C(F)(F)C(F)(F)F	PGYDZCBTWHHAQX-UHFFFAOYSA-N	Organic compounds	Organic acids and derivatives	Carboxylic acids and derivatives	Acrylic acids and derivatives	Acrylic acid esters	This compound belongs to the class of organic compounds known as acrylic acid esters. These are organic compounds containing and ester acrylic acid (CH2=CHC(=O)OH).	Aliphatic acyclic compounds	SMILES			1492-87-1	CN(CCCCOC(=O)C=C)S(=O)(=O)CCCC	KJUVROLYEPHUBE-UHFFFAOYSA-N	Organic compounds	Organic acids and derivatives	Carboxylic acids and derivatives	Acrylic acids and derivatives	Acrylic acid esters	This compound belongs to the class of organic compounds known as acrylic acid esters. These are organic compounds containing and ester acrylic acid (CH2=CHC(=O)OH).	Aliphatic acyclic compounds	SMILES
2135	68957-63-1	Glycine, N-ethyl-N-[(1,1,2,2,3,3,4,4,5,5,6,6,7,7,7-pentadecafluoroheptyl)sulfonyl]-	Glycine, N-ethyl-N-[(pentadecafluoroheptyl)sulfonyl]- (9CI); N-Ethyl-N-[(1,1,2,2,3,3,4,4,5,5,6,6,7,7,7-pentadecafluoroheptyl)sulfonyl]glycine	C11 H8 F15 N O4 S	CCN(CC(O)=O)S(=O)(=O)C(F)(F)C(F)(F)C(F)(F)C(F)(F)C(F)(F)C(F)(F)C(F)(F)F		203.05	perfluoroalkane sulfonyl acetic acids & esters	1	7	1	1	0	0	NA	0		CCN(CC(O)=O)S(=O)(=O)C(F)(F)C(F)(F)C(F)(F)C(F)(F)C(F)(F)C(F)(F)C(F)(F)F	CCNCC(O)=O	S(=O)(=O)C(F)(F)C(F)(F)C(F)(F)C(F)(F)C(F)(F)C(F)(F)C(F)(F)F	1	S(=O)(=O)			68957-63-1	CCN(CC(O)=O)S(=O)(=O)C(F)(F)C(F)(F)C(F)(F)C(F)(F)C(F)(F)C(F)(F)C(F)(F)F	IOQHTIQMCISFKB-UHFFFAOYSA-N	Organic compounds	Organohalogen compounds	Alkyl halides	Alkyl fluorides	Perfluoroalkane sulfonamidoacetals	This compound belongs to the class of organic compounds known as perfluoroalkane sulfonamidoacetals. These are organic compounds containing an alkyl chain attached to the sulfur of a sulfonamidoacetal, where all hydrogens of the alkyl chain are replaced by fluorine atoms.	Aliphatic acyclic compounds	SMILES			68957-63-1	CCN(CC(O)=O)S(=O)(=O)CCCCCCC	PEBXMAZGOJKZJL-UHFFFAOYSA-N	Organic compounds	Organic acids and derivatives	Carboxylic acids and derivatives	Amino acids, peptides, and analogues	Alpha amino acids and derivatives	This compound belongs to the class of organic compounds known as alpha amino acids and derivatives. These are amino acids in which the amino group is attached to the carbon atom immediately adjacent to the carboxylate group (alpha carbon), or a derivative thereof.	Aliphatic acyclic compounds	SMILES
2136	#VALUE!	1-Hexanesulfonamide, 1,1,2,2,3,3,4,4,5,5,6,6,6-tridecafluoro-N-(phenylmethyl)-	1,1,2,2,3,3,4,4,5,5,6,6,6-Tridecafluoro-N-(phenylmethyl)-1-hexanesulfonamide	C13 H8 F13 N O2 S	FC(F)(F)C(F)(F)C(F)(F)C(F)(F)C(F)(F)C(F)(F)S(=O)(=O)NCC1=CC=CC=C1		203	perfluoroalkane sulfonyl-based nonpolymers	1	6	1	1	0	0	NA	0		FC(F)(F)C(F)(F)C(F)(F)C(F)(F)C(F)(F)C(F)(F)S(=O)(=O)NCC1=CC=CC=C1	NCC1=CC=CC=C1	FC(F)(F)C(F)(F)C(F)(F)C(F)(F)C(F)(F)C(F)(F)S(=O)=O	1	S(=O)(=O)			#VALUE!	FC(F)(F)C(F)(F)C(F)(F)C(F)(F)C(F)(F)C(F)(F)S(=O)(=O)NCC1=CC=CC=C1	ZEIOJAPXFDPENM-UHFFFAOYSA-N	Organic compounds	Benzenoids	Benzene and substituted derivatives		Benzene and substituted derivatives	This compound belongs to the class of organic compounds known as benzene and substituted derivatives. These are aromatic compounds containing one monocyclic ring system consisting of benzene.	Aromatic homomonocyclic compounds	SMILES			#VALUE!	CCCCCCS(=O)(=O)NCC1=CC=CC=C1	CAIRTSZQSUBZDR-UHFFFAOYSA-N	Organic compounds	Benzenoids	Benzene and substituted derivatives		Benzene and substituted derivatives	This compound belongs to the class of organic compounds known as benzene and substituted derivatives. These are aromatic compounds containing one monocyclic ring system consisting of benzene.	Aromatic homomonocyclic compounds	SMILES
2140	67584-55-8	2-Propenoic acid, 2-[methyl[(1,1,2,2,3,3,4,4,4-nonafluorobutyl)sulfonyl]amino]ethyl ester	2-Propenoic acid, 2-[methyl[(nonafluorobutyl)sulfonyl]amino]ethyl ester (9CI)	C10 H10 F9 N O4 S	CN(CCOC(=O)C=C)S(=O)(=O)C(F)(F)C(F)(F)C(F)(F)C(F)(F)F		203.03	perfluoroalkane sulfonyl (meth)acrylates	1	4	1	1	0	0	NA	0		CN(CCOC(=O)C=C)S(=O)(=O)C(F)(F)C(F)(F)C(F)(F)C(F)(F)F	CNCCOC(=O)C=C	S(=O)(=O)C(F)(F)C(F)(F)C(F)(F)C(F)(F)F	1	S(=O)(=O)			67584-55-8	CN(CCOC(=O)C=C)S(=O)(=O)C(F)(F)C(F)(F)C(F)(F)C(F)(F)F	KEMCLRGAIUJRAN-UHFFFAOYSA-N	Organic compounds	Organic acids and derivatives	Carboxylic acids and derivatives	Acrylic acids and derivatives	Acrylic acid esters	This compound belongs to the class of organic compounds known as acrylic acid esters. These are organic compounds containing and ester acrylic acid (CH2=CHC(=O)OH).	Aliphatic acyclic compounds	SMILES			67584-55-8	CN(CCOC(=O)C=C)S(=O)(=O)CCCC	URMNELDVMBLVGJ-UHFFFAOYSA-N	Organic compounds	Organic acids and derivatives	Carboxylic acids and derivatives	Acrylic acids and derivatives	Acrylic acid esters	This compound belongs to the class of organic compounds known as acrylic acid esters. These are organic compounds containing and ester acrylic acid (CH2=CHC(=O)OH).	Aliphatic acyclic compounds	SMILES
2162	50598-29-3	1-Octanesulfonamide, 1,1,2,2,3,3,4,4,5,5,6,6,7,7,8,8,8-heptadecafluoro-N-(phenylmethyl)-	1,1,2,2,3,3,4,4,5,5,6,6,7,7,8,8,8-Heptadecafluoro-N-(phenylmethyl)-1-octanesulfonamide	C15 H8 F17 N O2 S	FC(F)(F)C(F)(F)C(F)(F)C(F)(F)C(F)(F)C(F)(F)C(F)(F)C(F)(F)S(=O)(=O)NCC1=CC=CC=C1		203	perfluoroalkane sulfonyl-based nonpolymers	1	8	1	1	0	0	NA	0		FC(F)(F)C(F)(F)C(F)(F)C(F)(F)C(F)(F)C(F)(F)C(F)(F)C(F)(F)S(=O)(=O)NCC1=CC=CC=C1	NCC1=CC=CC=C1	FC(F)(F)C(F)(F)C(F)(F)C(F)(F)C(F)(F)C(F)(F)C(F)(F)C(F)(F)S(=O)=O	1	S(=O)(=O)			50598-29-3	FC(F)(F)C(F)(F)C(F)(F)C(F)(F)C(F)(F)C(F)(F)C(F)(F)C(F)(F)S(=O)(=O)NCC1=CC=CC=C1	GRXIBAUTCQPULC-UHFFFAOYSA-N	Organic compounds	Organohalogen compounds	Alkyl halides	Alkyl fluorides	Perfluorooctane sulfonic acid and derivatives	This compound belongs to the class of organic compounds known as perfluorooctane sulfonic acid and derivatives. These are organic compounds containing an octyl chain attached to the sulfur of a sulfonic acid (or a derivative thereof), where all hydrogens of the octyl chain are replaced by fluorine atoms.	Aromatic homomonocyclic compounds	SMILES			50598-29-3	CCCCCCCCS(=O)(=O)NCC1=CC=CC=C1	GGTRNXCYHPFAEP-UHFFFAOYSA-N	Organic compounds	Benzenoids	Benzene and substituted derivatives		Benzene and substituted derivatives	This compound belongs to the class of organic compounds known as benzene and substituted derivatives. These are aromatic compounds containing one monocyclic ring system consisting of benzene.	Aromatic homomonocyclic compounds	SMILES
2164	#VALUE!	1-Heptanesulfonamide, 1,1,2,2,3,3,4,4,5,5,6,6,7,7,7-pentadecafluoro-N-(phenylmethyl)-	1,1,2,2,3,3,4,4,5,5,6,6,7,7,7-Pentadecafluoro-N-(phenylmethyl)-1-heptanesulfonamide	C14 H8 F15 N O2 S	FC(F)(F)C(F)(F)C(F)(F)C(F)(F)C(F)(F)C(F)(F)C(F)(F)S(=O)(=O)NCC1=CC=CC=C1		203	perfluoroalkane sulfonyl-based nonpolymers	1	7	1	1	0	0	NA	0		FC(F)(F)C(F)(F)C(F)(F)C(F)(F)C(F)(F)C(F)(F)C(F)(F)S(=O)(=O)NCC1=CC=CC=C1	NCC1=CC=CC=C1	FC(F)(F)C(F)(F)C(F)(F)C(F)(F)C(F)(F)C(F)(F)C(F)(F)S(=O)=O	1	S(=O)(=O)			#VALUE!	FC(F)(F)C(F)(F)C(F)(F)C(F)(F)C(F)(F)C(F)(F)C(F)(F)S(=O)(=O)NCC1=CC=CC=C1	ZJIFWMOMOPJFRZ-UHFFFAOYSA-N	Organic compounds	Benzenoids	Benzene and substituted derivatives		Benzene and substituted derivatives	This compound belongs to the class of organic compounds known as benzene and substituted derivatives. These are aromatic compounds containing one monocyclic ring system consisting of benzene.	Aromatic homomonocyclic compounds	SMILES			#VALUE!	CCCCCCCS(=O)(=O)NCC1=CC=CC=C1	KAWPZMXKWBBLRZ-UHFFFAOYSA-N	Organic compounds	Benzenoids	Benzene and substituted derivatives		Benzene and substituted derivatives	This compound belongs to the class of organic compounds known as benzene and substituted derivatives. These are aromatic compounds containing one monocyclic ring system consisting of benzene.	Aromatic homomonocyclic compounds	SMILES
2179	67584-59-2	2-Propenoic acid, 2-methyl-, 2-[methyl[(1,1,2,2,3,3,4,4,4-nonafluorobutyl)sulfonyl]amino]ethyl ester	2-Propenoic acid, 2-methyl-, 2-[methyl[(nonafluorobutyl)sulfonyl]amino]ethyl ester (9CI); [N-Methyl-perfluorobutane-1-sulfonamide]ethyl methacrylate	C11 H12 F9 N O4 S	CN(CCOC(=O)C(C)=C)S(=O)(=O)C(F)(F)C(F)(F)C(F)(F)C(F)(F)F		203.03	perfluoroalkane sulfonyl (meth)acrylates	1	4	1	1	0	0	NA	0		CN(CCOC(=O)C(C)=C)S(=O)(=O)C(F)(F)C(F)(F)C(F)(F)C(F)(F)F	CNCCOC(=O)C(C)=C	S(=O)(=O)C(F)(F)C(F)(F)C(F)(F)C(F)(F)F	1	S(=O)(=O)			67584-59-2	CN(CCOC(=O)C(C)=C)S(=O)(=O)C(F)(F)C(F)(F)C(F)(F)C(F)(F)F	BEIWUHUHJDEMQO-UHFFFAOYSA-N	Organic compounds	Organic acids and derivatives	Organic sulfonic acids and derivatives	Organosulfonic acids and derivatives	Organosulfonamides	This compound belongs to the class of organic compounds known as organosulfonamides. These are compounds containing the sulfonamide functional group, an amide of sulfonic acid with the general structure R1S(=O)2N(R2)R3 (R1=alkyl, aryl; R2,R3=H, alkyl, aryl).	Aliphatic acyclic compounds	SMILES			67584-59-2	CN(CCOC(=O)C(C)=C)S(=O)(=O)CCCC	HHBDUPHRNNGLCP-UHFFFAOYSA-N	Organic compounds	Organic acids and derivatives	Organic sulfonic acids and derivatives	Organosulfonic acids and derivatives	Organosulfonamides	This compound belongs to the class of organic compounds known as organosulfonamides. These are compounds containing the sulfonamide functional group, an amide of sulfonic acid with the general structure R1S(=O)2N(R2)R3 (R1=alkyl, aryl; R2,R3=H, alkyl, aryl).	Aliphatic acyclic compounds	SMILES
2190	66008-72-8	1-Propanaminium, N-(2-carboxyethyl)-N,N-dimethyl-3-[methyl[(3,3,4,4,5,5,6,6,7,7,8,8,8-tridecafluorooctyl)sulfonyl]amino]-, inner salt	1-Propanaminium, N-(2-carboxyethyl)-N,N-dimethyl-3-[methyl[(3,3,4,4,5,5,6,6,7,7,8,8,8-tridecafluorooctyl)sulfonyl]amino]-, hydroxide, inner salt	C17 H23 F13 N2 O4 S	CN(CCC[N+](C)(C)CCC([O-])=O)S(=O)(=O)CCC(F)(F)C(F)(F)C(F)(F)C(F)(F)C(F)(F)C(F)(F)F		203	perfluoroalkane sulfonyl-based nonpolymers	0	6	1	1	0	0	NA	0		CN(CCC[N+](C)(C)CCC([O-])=O)S(=O)(=O)CCC(F)(F)C(F)(F)C(F)(F)C(F)(F)C(F)(F)C(F)(F)F	CN(CCC[N+](C)(C)CCC([O-])=O)S(=O)=O	CCC(F)(F)C(F)(F)C(F)(F)C(F)(F)C(F)(F)C(F)(F)F	1	[CH2][CH2]			66008-72-8	CN(CCC[N+](C)(C)CCC([O-])=O)S(=O)(=O)CCC(F)(F)C(F)(F)C(F)(F)C(F)(F)C(F)(F)C(F)(F)F	TUOHUMKQNSQWKE-UHFFFAOYSA-N	Organic compounds	Organic acids and derivatives	Organic sulfonic acids and derivatives	Organosulfonic acids and derivatives	Organosulfonamides	This compound belongs to the class of organic compounds known as organosulfonamides. These are compounds containing the sulfonamide functional group, an amide of sulfonic acid with the general structure R1S(=O)2N(R2)R3 (R1=alkyl, aryl; R2,R3=H, alkyl, aryl).	Aliphatic acyclic compounds	SMILES			66008-72-8	CN(CCC[N+](C)(C)CCC([O-])=O)S(=O)(=O)CCCCCCCC	PYGKZKPTVYHLEV-UHFFFAOYSA-N	Organic compounds	Organic acids and derivatives	Organic sulfonic acids and derivatives	Organosulfonic acids and derivatives	Organosulfonamides	This compound belongs to the class of organic compounds known as organosulfonamides. These are compounds containing the sulfonamide functional group, an amide of sulfonic acid with the general structure R1S(=O)2N(R2)R3 (R1=alkyl, aryl; R2,R3=H, alkyl, aryl).	Aliphatic acyclic compounds	SMILES
2198	17329-79-2	2-Propenoic acid, 2-[ethyl[(1,1,2,2,3,3,4,4,4-nonafluorobutyl)sulfonyl]amino]ethyl ester	2-Propenoic acid, 2-[ethyl[(nonafluorobutyl)sulfonyl]amino]ethyl ester (9CI)	C11 H12 F9 N O4 S	CCN(CCOC(=O)C=C)S(=O)(=O)C(F)(F)C(F)(F)C(F)(F)C(F)(F)F		203.03	perfluoroalkane sulfonyl (meth)acrylates	1	4	1	1	0	0	NA	0		CCN(CCOC(=O)C=C)S(=O)(=O)C(F)(F)C(F)(F)C(F)(F)C(F)(F)F	CCNCCOC(=O)C=C	S(=O)(=O)C(F)(F)C(F)(F)C(F)(F)C(F)(F)F	1	S(=O)(=O)			17329-79-2	CCN(CCOC(=O)C=C)S(=O)(=O)C(F)(F)C(F)(F)C(F)(F)C(F)(F)F	DULAHVOOPMNHFB-UHFFFAOYSA-N	Organic compounds	Organic acids and derivatives	Carboxylic acids and derivatives	Acrylic acids and derivatives	Acrylic acid esters	This compound belongs to the class of organic compounds known as acrylic acid esters. These are organic compounds containing and ester acrylic acid (CH2=CHC(=O)OH).	Aliphatic acyclic compounds	SMILES			17329-79-2	CCN(CCOC(=O)C=C)S(=O)(=O)CCCC	BUVOWFZVLMIXLF-UHFFFAOYSA-N	Organic compounds	Organic acids and derivatives	Carboxylic acids and derivatives	Acrylic acids and derivatives	Acrylic acid esters	This compound belongs to the class of organic compounds known as acrylic acid esters. These are organic compounds containing and ester acrylic acid (CH2=CHC(=O)OH).	Aliphatic acyclic compounds	SMILES
2222	68227-99-6	2-Propenoic acid, 4-[methyl[(1,1,2,2,3,3,4,4,5,5,5-undecafluoropentyl)sulfonyl]amino]butyl ester	2-Propenoic acid, 4-[methyl[(undecafluoropentyl)sulfonyl]amino]butyl ester (9CI)	C13 H14 F11 N O4 S	CN(CCCCOC(=O)C=C)S(=O)(=O)C(F)(F)C(F)(F)C(F)(F)C(F)(F)C(F)(F)F		203.03	perfluoroalkane sulfonyl (meth)acrylates	1	5	1	1	0	0	NA	0		CN(CCCCOC(=O)C=C)S(=O)(=O)C(F)(F)C(F)(F)C(F)(F)C(F)(F)C(F)(F)F	CNCCCCOC(=O)C=C	S(=O)(=O)C(F)(F)C(F)(F)C(F)(F)C(F)(F)C(F)(F)F	1	S(=O)(=O)			68227-99-6	CN(CCCCOC(=O)C=C)S(=O)(=O)C(F)(F)C(F)(F)C(F)(F)C(F)(F)C(F)(F)F	IGHHYZVIDWXKMF-UHFFFAOYSA-N	Organic compounds	Organic acids and derivatives	Carboxylic acids and derivatives	Acrylic acids and derivatives	Acrylic acid esters	This compound belongs to the class of organic compounds known as acrylic acid esters. These are organic compounds containing and ester acrylic acid (CH2=CHC(=O)OH).	Aliphatic acyclic compounds	SMILES			68227-99-6	CN(CCCCOC(=O)C=C)S(=O)(=O)CCCCC	KUNAFWXAHVEPHZ-UHFFFAOYSA-N	Organic compounds	Organic acids and derivatives	Carboxylic acids and derivatives	Acrylic acids and derivatives	Acrylic acid esters	This compound belongs to the class of organic compounds known as acrylic acid esters. These are organic compounds containing and ester acrylic acid (CH2=CHC(=O)OH).	Aliphatic acyclic compounds	SMILES
2223	67939-33-7	2-Propenoic acid, 2-methyl-, 2-[ethyl[(1,1,2,2,3,3,4,4,4-nonafluorobutyl)sulfonyl]amino]ethyl ester	2-Propenoic acid, 2-methyl-, 2-[ethyl[(nonafluorobutyl)sulfonyl]amino]ethyl ester (9CI)	C12 H14 F9 N O4 S	CCN(CCOC(=O)C(C)=C)S(=O)(=O)C(F)(F)C(F)(F)C(F)(F)C(F)(F)F		203.03	perfluoroalkane sulfonyl (meth)acrylates	1	4	1	1	0	0	NA	0		CCN(CCOC(=O)C(C)=C)S(=O)(=O)C(F)(F)C(F)(F)C(F)(F)C(F)(F)F	CCNCCOC(=O)C(C)=C	S(=O)(=O)C(F)(F)C(F)(F)C(F)(F)C(F)(F)F	1	S(=O)(=O)			67939-33-7	CCN(CCOC(=O)C(C)=C)S(=O)(=O)C(F)(F)C(F)(F)C(F)(F)C(F)(F)F	DSOQNQBWSKFGJG-UHFFFAOYSA-N	Organic compounds	Organic acids and derivatives	Organic sulfonic acids and derivatives	Organosulfonic acids and derivatives	Organosulfonamides	This compound belongs to the class of organic compounds known as organosulfonamides. These are compounds containing the sulfonamide functional group, an amide of sulfonic acid with the general structure R1S(=O)2N(R2)R3 (R1=alkyl, aryl; R2,R3=H, alkyl, aryl).	Aliphatic acyclic compounds	SMILES			67939-33-7	CCN(CCOC(=O)C(C)=C)S(=O)(=O)CCCC	HHIJWQKZKIFISR-UHFFFAOYSA-N	Organic compounds	Organic acids and derivatives	Organic sulfonic acids and derivatives	Organosulfonic acids and derivatives	Organosulfonamides	This compound belongs to the class of organic compounds known as organosulfonamides. These are compounds containing the sulfonamide functional group, an amide of sulfonic acid with the general structure R1S(=O)2N(R2)R3 (R1=alkyl, aryl; R2,R3=H, alkyl, aryl).	Aliphatic acyclic compounds	SMILES
2228	67584-56-9	2-Propenoic acid, 2-[methyl[(1,1,2,2,3,3,4,4,5,5,5-undecafluoropentyl)sulfonyl]amino]ethyl ester	2-Propenoic acid, 2-[methyl[(undecafluoropentyl)sulfonyl]amino]ethyl ester (9CI)	C11 H10 F11 N O4 S	CN(CCOC(=O)C=C)S(=O)(=O)C(F)(F)C(F)(F)C(F)(F)C(F)(F)C(F)(F)F		203.03	perfluoroalkane sulfonyl (meth)acrylates	1	5	1	1	0	0	NA	0		CN(CCOC(=O)C=C)S(=O)(=O)C(F)(F)C(F)(F)C(F)(F)C(F)(F)C(F)(F)F	CNCCOC(=O)C=C	S(=O)(=O)C(F)(F)C(F)(F)C(F)(F)C(F)(F)C(F)(F)F	1	S(=O)(=O)			67584-56-9	CN(CCOC(=O)C=C)S(=O)(=O)C(F)(F)C(F)(F)C(F)(F)C(F)(F)C(F)(F)F	FZWFDJBZTLTRGH-UHFFFAOYSA-N	Organic compounds	Organic acids and derivatives	Carboxylic acids and derivatives	Acrylic acids and derivatives	Acrylic acid esters	This compound belongs to the class of organic compounds known as acrylic acid esters. These are organic compounds containing and ester acrylic acid (CH2=CHC(=O)OH).	Aliphatic acyclic compounds	SMILES			67584-56-9	CN(CCOC(=O)C=C)S(=O)(=O)CCCCC	LXCDGAVTOLLAEN-UHFFFAOYSA-N	Organic compounds	Organic acids and derivatives	Carboxylic acids and derivatives	Acrylic acids and derivatives	Acrylic acid esters	This compound belongs to the class of organic compounds known as acrylic acid esters. These are organic compounds containing and ester acrylic acid (CH2=CHC(=O)OH).	Aliphatic acyclic compounds	SMILES
2229	71463-78-0	Phosphonic acid, P-[3-[ethyl[(1,1,2,2,3,3,4,4,5,5,6,6,7,7,8,8,8-heptadecafluorooctyl)sulfonyl]amino]propyl]-	Phosphonic acid, [3-[ethyl[(heptadecafluorooctyl)sulfonyl]amino]propyl]- (9CI); P-[3-[Ethyl[(1,1,2,2,3,3,4,4,5,5,6,6,7,7,8,8,8-heptadecafluorooctyl)sulfonyl]amino]propyl]phosphonic acid	C13 H13 F17 N O5 P S	CCN(CCCP(O)(O)=O)S(=O)(=O)C(F)(F)C(F)(F)C(F)(F)C(F)(F)C(F)(F)C(F)(F)C(F)(F)C(F)(F)F		203	perfluoroalkane sulfonyl-based nonpolymers	1	8	1	1	0	0	NA	0		CCN(CCCP(O)(O)=O)S(=O)(=O)C(F)(F)C(F)(F)C(F)(F)C(F)(F)C(F)(F)C(F)(F)C(F)(F)C(F)(F)F	CCNCCCP(O)(O)=O	S(=O)(=O)C(F)(F)C(F)(F)C(F)(F)C(F)(F)C(F)(F)C(F)(F)C(F)(F)C(F)(F)F	1	S(=O)(=O)			71463-78-0	CCN(CCCP(O)(O)=O)S(=O)(=O)C(F)(F)C(F)(F)C(F)(F)C(F)(F)C(F)(F)C(F)(F)C(F)(F)C(F)(F)F	INHFWJVSNWHLSP-UHFFFAOYSA-N	Organic compounds	Organohalogen compounds	Alkyl halides	Alkyl fluorides	Perfluorooctane sulfonic acid and derivatives	This compound belongs to the class of organic compounds known as perfluorooctane sulfonic acid and derivatives. These are organic compounds containing an octyl chain attached to the sulfur of a sulfonic acid (or a derivative thereof), where all hydrogens of the octyl chain are replaced by fluorine atoms.	Aliphatic acyclic compounds	SMILES			71463-78-0	CCN(CCCP(O)(O)=O)S(=O)(=O)CCCCCCCC	XICAJBBXTLHRKO-UHFFFAOYSA-N	Organic compounds	Organic acids and derivatives	Organic sulfonic acids and derivatives	Organosulfonic acids and derivatives	Organosulfonamides	This compound belongs to the class of organic compounds known as organosulfonamides. These are compounds containing the sulfonamide functional group, an amide of sulfonic acid with the general structure R1S(=O)2N(R2)R3 (R1=alkyl, aryl; R2,R3=H, alkyl, aryl).	Aliphatic acyclic compounds	SMILES
2240	3820-83-5	1-Octanesulfonamide, N-ethyl-1,1,2,2,3,3,4,4,5,5,6,6,7,7,8,8,8-heptadecafluoro-N-[2-(phosphonooxy)ethyl]-	1-Octanesulfonamide, N-ethyl-1,1,2,2,3,3,4,4,5,5,6,6,7,7,8,8,8-heptadecafluoro-N-(2-hydroxyethyl)-, dihydrogen phosphate (ester) (8CI); 1-Octanesulfonamide, N-ethyl-1,1,2,2,3,3,4,4,5,5,6,6,7,7,8,8,8-heptadecafluoro-N-(2-hydroxyethyl)-, phosphate (6CI,7CI); N-Ethyl-1,1,2,2,3,3,4,4,5,5,6,6,7,7,8,8,8-heptadecafluoro-N-[2-(phosphonooxy)ethyl]-1-octanesulfonamide; FC 161; N-Ethyl-N-(2-hydroxyethyl)per…	C12 H11 F17 N O6 P S	CCN(CCOP(O)(O)=O)S(=O)(=O)C(F)(F)C(F)(F)C(F)(F)C(F)(F)C(F)(F)C(F)(F)C(F)(F)C(F)(F)F		203	perfluoroalkane sulfonyl-based nonpolymers	1	8	1	1	0	0	NA	0		CCN(CCOP(O)(O)=O)S(=O)(=O)C(F)(F)C(F)(F)C(F)(F)C(F)(F)C(F)(F)C(F)(F)C(F)(F)C(F)(F)F	CCNCCOP(O)(O)=O	S(=O)(=O)C(F)(F)C(F)(F)C(F)(F)C(F)(F)C(F)(F)C(F)(F)C(F)(F)C(F)(F)F	1	S(=O)(=O)			3820-83-5	CCN(CCOP(O)(O)=O)S(=O)(=O)C(F)(F)C(F)(F)C(F)(F)C(F)(F)C(F)(F)C(F)(F)C(F)(F)C(F)(F)F	JRSUJBJSUYPODE-UHFFFAOYSA-N	Organic compounds	Organohalogen compounds	Alkyl halides	Alkyl fluorides	Perfluorooctane sulfonic acid and derivatives	This compound belongs to the class of organic compounds known as perfluorooctane sulfonic acid and derivatives. These are organic compounds containing an octyl chain attached to the sulfur of a sulfonic acid (or a derivative thereof), where all hydrogens of the octyl chain are replaced by fluorine atoms.	Aliphatic acyclic compounds	SMILES			3820-83-5	CCN(CCOP(O)(O)=O)S(=O)(=O)CCCCCCCC	FPSMHQIZFGVIFH-UHFFFAOYSA-N	Organic compounds	Organic acids and derivatives	Organic phosphoric acids and derivatives	Phosphate esters	Phosphoethanolamines	This compound belongs to the class of organic compounds known as phosphoethanolamines. These are compounds containing a phosphate linked to the second carbon of an ethanolamine.	Aliphatic acyclic compounds	SMILES
2245	68227-98-5	2-Propenoic acid, 4-[methyl[(1,1,2,2,3,3,4,4,5,5,6,6,6-tridecafluorohexyl)sulfonyl]amino]butyl ester	2-Propenoic acid, 4-[methyl[(tridecafluorohexyl)sulfonyl]amino]butyl ester (9CI)	C14 H14 F13 N O4 S	CN(CCCCOC(=O)C=C)S(=O)(=O)C(F)(F)C(F)(F)C(F)(F)C(F)(F)C(F)(F)C(F)(F)F		203.03	perfluoroalkane sulfonyl (meth)acrylates	1	6	1	1	0	0	NA	0		CN(CCCCOC(=O)C=C)S(=O)(=O)C(F)(F)C(F)(F)C(F)(F)C(F)(F)C(F)(F)C(F)(F)F	CNCCCCOC(=O)C=C	S(=O)(=O)C(F)(F)C(F)(F)C(F)(F)C(F)(F)C(F)(F)C(F)(F)F	1	S(=O)(=O)			68227-98-5	CN(CCCCOC(=O)C=C)S(=O)(=O)C(F)(F)C(F)(F)C(F)(F)C(F)(F)C(F)(F)C(F)(F)F	JLUHIZCVSXFBEG-UHFFFAOYSA-N	Organic compounds	Organic acids and derivatives	Carboxylic acids and derivatives	Acrylic acids and derivatives	Acrylic acid esters	This compound belongs to the class of organic compounds known as acrylic acid esters. These are organic compounds containing and ester acrylic acid (CH2=CHC(=O)OH).	Aliphatic acyclic compounds	SMILES			68227-98-5	CN(CCCCOC(=O)C=C)S(=O)(=O)CCCCCC	AOXVHULVULMWBU-UHFFFAOYSA-N	Organic compounds	Organic acids and derivatives	Carboxylic acids and derivatives	Acrylic acids and derivatives	Acrylic acid esters	This compound belongs to the class of organic compounds known as acrylic acid esters. These are organic compounds containing and ester acrylic acid (CH2=CHC(=O)OH).	Aliphatic acyclic compounds	SMILES
2247	1869-77-8	Glycine, N-ethyl-N-[(1,1,2,2,3,3,4,4,5,5,6,6,7,7,8,8,8-heptadecafluorooctyl)sulfonyl]-, ethyl ester	Glycine, N-ethyl-N-[(heptadecafluorooctyl)sulfonyl]-, ethyl ester (6CI,8CI,9CI)	C14 H12 F17 N O4 S	CCOC(=O)CN(CC)S(=O)(=O)C(F)(F)C(F)(F)C(F)(F)C(F)(F)C(F)(F)C(F)(F)C(F)(F)C(F)(F)F		203.05	perfluoroalkane sulfonyl acetic acids & esters	1	8	1	1	0	0	NA	0		CCOC(=O)CN(CC)S(=O)(=O)C(F)(F)C(F)(F)C(F)(F)C(F)(F)C(F)(F)C(F)(F)C(F)(F)C(F)(F)F	CCOC(=O)CNCC	S(=O)(=O)C(F)(F)C(F)(F)C(F)(F)C(F)(F)C(F)(F)C(F)(F)C(F)(F)C(F)(F)F	1	S(=O)(=O)			1869-77-8	CCOC(=O)CN(CC)S(=O)(=O)C(F)(F)C(F)(F)C(F)(F)C(F)(F)C(F)(F)C(F)(F)C(F)(F)C(F)(F)F	LMUUXHHNCDERBQ-UHFFFAOYSA-N	Organic compounds	Organohalogen compounds	Alkyl halides	Alkyl fluorides	Perfluorooctane sulfonic acid and derivatives	This compound belongs to the class of organic compounds known as perfluorooctane sulfonic acid and derivatives. These are organic compounds containing an octyl chain attached to the sulfur of a sulfonic acid (or a derivative thereof), where all hydrogens of the octyl chain are replaced by fluorine atoms.	Aliphatic acyclic compounds	SMILES			1869-77-8	CCOC(=O)CN(CC)S(=O)(=O)CCCCCCCC	AUAHROQVFVDVRV-UHFFFAOYSA-N	Organic compounds	Organic acids and derivatives	Carboxylic acids and derivatives	Amino acids, peptides, and analogues	Alpha amino acid esters	This compound belongs to the class of organic compounds known as alpha amino acid esters. These are ester derivatives of alpha amino acids.	Aliphatic acyclic compounds	SMILES
2251	68227-97-4	2-Propenoic acid, 4-[methyl[(1,1,2,2,3,3,4,4,5,5,6,6,7,7,7-pentadecafluoroheptyl)sulfonyl]amino]butyl ester	2-Propenoic acid, 4-[methyl[(pentadecafluoroheptyl)sulfonyl]amino]butyl ester (9CI)	C15 H14 F15 N O4 S	CN(CCCCOC(=O)C=C)S(=O)(=O)C(F)(F)C(F)(F)C(F)(F)C(F)(F)C(F)(F)C(F)(F)C(F)(F)F		203.03	perfluoroalkane sulfonyl (meth)acrylates	1	7	1	1	0	0	NA	0		CN(CCCCOC(=O)C=C)S(=O)(=O)C(F)(F)C(F)(F)C(F)(F)C(F)(F)C(F)(F)C(F)(F)C(F)(F)F	CNCCCCOC(=O)C=C	S(=O)(=O)C(F)(F)C(F)(F)C(F)(F)C(F)(F)C(F)(F)C(F)(F)C(F)(F)F	1	S(=O)(=O)			68227-97-4	CN(CCCCOC(=O)C=C)S(=O)(=O)C(F)(F)C(F)(F)C(F)(F)C(F)(F)C(F)(F)C(F)(F)C(F)(F)F	XOBAFFLCNWEIRZ-UHFFFAOYSA-N	Organic compounds	Organic acids and derivatives	Carboxylic acids and derivatives	Acrylic acids and derivatives	Acrylic acid esters	This compound belongs to the class of organic compounds known as acrylic acid esters. These are organic compounds containing and ester acrylic acid (CH2=CHC(=O)OH).	Aliphatic acyclic compounds	SMILES			68227-97-4	CN(CCCCOC(=O)C=C)S(=O)(=O)CCCCCCC	PJVREFLDASKAJS-UHFFFAOYSA-N	Organic compounds	Organic acids and derivatives	Carboxylic acids and derivatives	Acrylic acids and derivatives	Acrylic acid esters	This compound belongs to the class of organic compounds known as acrylic acid esters. These are organic compounds containing and ester acrylic acid (CH2=CHC(=O)OH).	Aliphatic acyclic compounds	SMILES
2252	64264-44-4	1-Octanesulfonamide, 1,1,2,2,3,3,4,4,5,5,6,6,7,7,8,8,8-heptadecafluoro-N-[2-(phosphonooxy)ethyl]-N-propyl-	1,1,2,2,3,3,4,4,5,5,6,6,7,7,8,8,8-Heptadecafluoro-N-[2-(phosphonooxy)ethyl]-N-propyl-1-octanesulfonamide; Megafac F 191	C13 H13 F17 N O6 P S	CCCN(CCOP(O)(O)=O)S(=O)(=O)C(F)(F)C(F)(F)C(F)(F)C(F)(F)C(F)(F)C(F)(F)C(F)(F)C(F)(F)F	80804-33-7, 144696-85-5	203	perfluoroalkane sulfonyl-based nonpolymers	1	8	1	1	0	0	NA	0		CCCN(CCOP(O)(O)=O)S(=O)(=O)C(F)(F)C(F)(F)C(F)(F)C(F)(F)C(F)(F)C(F)(F)C(F)(F)C(F)(F)F	CCCNCCOP(O)(O)=O	S(=O)(=O)C(F)(F)C(F)(F)C(F)(F)C(F)(F)C(F)(F)C(F)(F)C(F)(F)C(F)(F)F	1	S(=O)(=O)			64264-44-4	CCCN(CCOP(O)(O)=O)S(=O)(=O)C(F)(F)C(F)(F)C(F)(F)C(F)(F)C(F)(F)C(F)(F)C(F)(F)C(F)(F)F	WTBPTHWHWVYYJV-UHFFFAOYSA-N	Organic compounds	Organohalogen compounds	Alkyl halides	Alkyl fluorides	Perfluorooctane sulfonic acid and derivatives	This compound belongs to the class of organic compounds known as perfluorooctane sulfonic acid and derivatives. These are organic compounds containing an octyl chain attached to the sulfur of a sulfonic acid (or a derivative thereof), where all hydrogens of the octyl chain are replaced by fluorine atoms.	Aliphatic acyclic compounds	SMILES			64264-44-4	CCCN(CCOP(O)(O)=O)S(=O)(=O)CCCCCCCC	LJCZMEOXFOSPMP-UHFFFAOYSA-N	Organic compounds	Organic acids and derivatives	Organic phosphoric acids and derivatives	Phosphate esters	Phosphoethanolamines	This compound belongs to the class of organic compounds known as phosphoethanolamines. These are compounds containing a phosphate linked to the second carbon of an ethanolamine.	Aliphatic acyclic compounds	SMILES
2253	67584-57-0	2-Propenoic acid, 2-[methyl[(1,1,2,2,3,3,4,4,5,5,6,6,6-tridecafluorohexyl)sulfonyl]amino]ethyl ester	2-Propenoic acid, 2-[methyl[(tridecafluorohexyl)sulfonyl]amino]ethyl ester (9CI); [N-Methylperfluorohexane-1-sulfonamide]ethyl acrylate	C12 H10 F13 N O4 S	CN(CCOC(=O)C=C)S(=O)(=O)C(F)(F)C(F)(F)C(F)(F)C(F)(F)C(F)(F)C(F)(F)F	157122-25-3	203.03	perfluoroalkane sulfonyl (meth)acrylates	1	6	1	1	0	0	NA	0		CN(CCOC(=O)C=C)S(=O)(=O)C(F)(F)C(F)(F)C(F)(F)C(F)(F)C(F)(F)C(F)(F)F	CNCCOC(=O)C=C	S(=O)(=O)C(F)(F)C(F)(F)C(F)(F)C(F)(F)C(F)(F)C(F)(F)F	1	S(=O)(=O)			67584-57-0	CN(CCOC(=O)C=C)S(=O)(=O)C(F)(F)C(F)(F)C(F)(F)C(F)(F)C(F)(F)C(F)(F)F	HLKZFXXWGVPYAY-UHFFFAOYSA-N	Organic compounds	Organic acids and derivatives	Carboxylic acids and derivatives	Acrylic acids and derivatives	Acrylic acid esters	This compound belongs to the class of organic compounds known as acrylic acid esters. These are organic compounds containing and ester acrylic acid (CH2=CHC(=O)OH).	Aliphatic acyclic compounds	SMILES			67584-57-0	CN(CCOC(=O)C=C)S(=O)(=O)CCCCCC	CTSWPRFXGSARLG-UHFFFAOYSA-N	Organic compounds	Organic acids and derivatives	Carboxylic acids and derivatives	Acrylic acids and derivatives	Acrylic acid esters	This compound belongs to the class of organic compounds known as acrylic acid esters. These are organic compounds containing and ester acrylic acid (CH2=CHC(=O)OH).	Aliphatic acyclic compounds	SMILES
2255	58920-31-3	2-Propenoic acid, 4-[[(1,1,2,2,3,3,4,4,5,5,6,6,7,7,8,8,8-heptadecafluorooctyl)sulfonyl]methylamino]butyl ester	2-Propenoic acid, 4-[[(heptadecafluorooctyl)sulfonyl]methylamino]butyl ester (9CI)	C16 H14 F17 N O4 S	CN(CCCCOC(=O)C=C)S(=O)(=O)C(F)(F)C(F)(F)C(F)(F)C(F)(F)C(F)(F)C(F)(F)C(F)(F)C(F)(F)F		203.03	perfluoroalkane sulfonyl (meth)acrylates	1	8	1	1	0	0	NA	0		CN(CCCCOC(=O)C=C)S(=O)(=O)C(F)(F)C(F)(F)C(F)(F)C(F)(F)C(F)(F)C(F)(F)C(F)(F)C(F)(F)F	CNCCCCOC(=O)C=C	S(=O)(=O)C(F)(F)C(F)(F)C(F)(F)C(F)(F)C(F)(F)C(F)(F)C(F)(F)C(F)(F)F	1	S(=O)(=O)			58920-31-3	CN(CCCCOC(=O)C=C)S(=O)(=O)C(F)(F)C(F)(F)C(F)(F)C(F)(F)C(F)(F)C(F)(F)C(F)(F)C(F)(F)F	XEVYGIAXCSAAOA-UHFFFAOYSA-N	Organic compounds	Organohalogen compounds	Alkyl halides	Alkyl fluorides	Perfluorooctane sulfonic acid and derivatives	This compound belongs to the class of organic compounds known as perfluorooctane sulfonic acid and derivatives. These are organic compounds containing an octyl chain attached to the sulfur of a sulfonic acid (or a derivative thereof), where all hydrogens of the octyl chain are replaced by fluorine atoms.	Aliphatic acyclic compounds	SMILES			58920-31-3	CN(CCCCOC(=O)C=C)S(=O)(=O)CCCCCCCC	NMEJFZBFXXROQG-UHFFFAOYSA-N	Organic compounds	Organic acids and derivatives	Carboxylic acids and derivatives	Acrylic acids and derivatives	Acrylic acid esters	This compound belongs to the class of organic compounds known as acrylic acid esters. These are organic compounds containing and ester acrylic acid (CH2=CHC(=O)OH).	Aliphatic acyclic compounds	SMILES
2256	68084-62-8	2-Propenoic acid, 2-[methyl[(1,1,2,2,3,3,4,4,5,5,6,6,7,7,7-pentadecafluoroheptyl)sulfonyl]amino]ethyl ester	2-Propenoic acid, 2-[methyl[(pentadecafluoroheptyl)sulfonyl]amino]ethyl ester (9CI)	C13 H10 F15 N O4 S	CN(CCOC(=O)C=C)S(=O)(=O)C(F)(F)C(F)(F)C(F)(F)C(F)(F)C(F)(F)C(F)(F)C(F)(F)F		203.03	perfluoroalkane sulfonyl (meth)acrylates	1	7	1	1	0	0	NA	0		CN(CCOC(=O)C=C)S(=O)(=O)C(F)(F)C(F)(F)C(F)(F)C(F)(F)C(F)(F)C(F)(F)C(F)(F)F	CNCCOC(=O)C=C	S(=O)(=O)C(F)(F)C(F)(F)C(F)(F)C(F)(F)C(F)(F)C(F)(F)C(F)(F)F	1	S(=O)(=O)			68084-62-8	CN(CCOC(=O)C=C)S(=O)(=O)C(F)(F)C(F)(F)C(F)(F)C(F)(F)C(F)(F)C(F)(F)C(F)(F)F	BEYGZFVOTUDDJK-UHFFFAOYSA-N	Organic compounds	Organic acids and derivatives	Carboxylic acids and derivatives	Acrylic acids and derivatives	Acrylic acid esters	This compound belongs to the class of organic compounds known as acrylic acid esters. These are organic compounds containing and ester acrylic acid (CH2=CHC(=O)OH).	Aliphatic acyclic compounds	SMILES			68084-62-8	CN(CCOC(=O)C=C)S(=O)(=O)CCCCCCC	BEZSWQGKGPLNAB-UHFFFAOYSA-N	Organic compounds	Organic acids and derivatives	Carboxylic acids and derivatives	Acrylic acids and derivatives	Acrylic acid esters	This compound belongs to the class of organic compounds known as acrylic acid esters. These are organic compounds containing and ester acrylic acid (CH2=CHC(=O)OH).	Aliphatic acyclic compounds	SMILES
2257	#VALUE!	2-Propenoic acid, 2-[ethyl[(1,1,2,2,3,3,4,4,5,5,5-undecafluoropentyl)sulfonyl]amino]ethyl ester	2-Propenoic acid, 2-[ethyl[(undecafluoropentyl)sulfonyl]amino]ethyl ester (9CI)	C12 H12 F11 N O4 S	CCN(CCOC(=O)C=C)S(=O)(=O)C(F)(F)C(F)(F)C(F)(F)C(F)(F)C(F)(F)F		203.03	perfluoroalkane sulfonyl (meth)acrylates	1	5	1	1	0	0	NA	0		CCN(CCOC(=O)C=C)S(=O)(=O)C(F)(F)C(F)(F)C(F)(F)C(F)(F)C(F)(F)F	CCNCCOC(=O)C=C	S(=O)(=O)C(F)(F)C(F)(F)C(F)(F)C(F)(F)C(F)(F)F	1	S(=O)(=O)			#VALUE!	CCN(CCOC(=O)C=C)S(=O)(=O)C(F)(F)C(F)(F)C(F)(F)C(F)(F)C(F)(F)F	ZCIQIKYETQVARM-UHFFFAOYSA-N	Organic compounds	Organic acids and derivatives	Carboxylic acids and derivatives	Acrylic acids and derivatives	Acrylic acid esters	This compound belongs to the class of organic compounds known as acrylic acid esters. These are organic compounds containing and ester acrylic acid (CH2=CHC(=O)OH).	Aliphatic acyclic compounds	SMILES			#VALUE!	CCN(CCOC(=O)C=C)S(=O)(=O)CCCCC	OUPVVWQMXLTNPN-UHFFFAOYSA-N	Organic compounds	Organic acids and derivatives	Carboxylic acids and derivatives	Acrylic acids and derivatives	Acrylic acid esters	This compound belongs to the class of organic compounds known as acrylic acid esters. These are organic compounds containing and ester acrylic acid (CH2=CHC(=O)OH).	Aliphatic acyclic compounds	SMILES
2264	71463-80-4	Phosphonic acid, P-[3-[ethyl[(1,1,2,2,3,3,4,4,5,5,6,6,7,7,8,8,8-heptadecafluorooctyl)sulfonyl]amino]propyl]-, diethyl ester	Phosphonic acid, [3-[ethyl[(heptadecafluorooctyl)sulfonyl]amino]propyl]-, diethyl ester (9CI)	C17 H21 F17 N O5 P S	CCOP(=O)(CCCN(CC)S(=O)(=O)C(F)(F)C(F)(F)C(F)(F)C(F)(F)C(F)(F)C(F)(F)C(F)(F)C(F)(F)F)OCC		203	perfluoroalkane sulfonyl-based nonpolymers	1	8	1	1	0	0	NA	0		CCOP(=O)(CCCN(CC)S(=O)(=O)C(F)(F)C(F)(F)C(F)(F)C(F)(F)C(F)(F)C(F)(F)C(F)(F)C(F)(F)F)OCC	CCOP(=O)(CCCNCC)OCC	S(=O)(=O)C(F)(F)C(F)(F)C(F)(F)C(F)(F)C(F)(F)C(F)(F)C(F)(F)C(F)(F)F	1	S(=O)(=O)			71463-80-4	CCOP(=O)(CCCN(CC)S(=O)(=O)C(F)(F)C(F)(F)C(F)(F)C(F)(F)C(F)(F)C(F)(F)C(F)(F)C(F)(F)F)OCC	CGWCDHWSHVIYSL-UHFFFAOYSA-N	Organic compounds	Organohalogen compounds	Alkyl halides	Alkyl fluorides	Perfluorooctane sulfonic acid and derivatives	This compound belongs to the class of organic compounds known as perfluorooctane sulfonic acid and derivatives. These are organic compounds containing an octyl chain attached to the sulfur of a sulfonic acid (or a derivative thereof), where all hydrogens of the octyl chain are replaced by fluorine atoms.	Aliphatic acyclic compounds	SMILES			71463-80-4	CCOP(=O)(CCCN(CC)S(=O)(=O)CCCCCCCC)OCC	XPMJRTSFGUHXKI-UHFFFAOYSA-N	Organic compounds	Organic acids and derivatives	Organic phosphonic acids and derivatives	Phosphonic acid diesters	Dialkyl alkylphosphonates	This compound belongs to the class of organic compounds known as dialkyl alkylphosphonates. These are compounds containing a phosphonic acid that is diesterified with alkyl groups, and the phosphorus atom is also directly attached to an alkyl group.	Aliphatic acyclic compounds	SMILES
2266	25268-77-3	2-Propenoic acid, 2-[[(1,1,2,2,3,3,4,4,5,5,6,6,7,7,8,8,8-heptadecafluorooctyl)sulfonyl]methylamino]ethyl ester	2-Propenoic acid, 2-[[(heptadecafluorooctyl)sulfonyl]methylamino]ethyl ester (9CI); Acrylic acid, ester with 1,1,2,2,3,3,4,4,5,5,6,6,7,7,8,8,8-heptadecafluoro-N-(2-hydroxyethyl)-N-methyl-1-octanesulfonamide (8CI); 1-Octanesulfonamide, 1,1,2,2,3,3,4,4,5,5,6,6,7,7,8,8,8-heptadecafluoro-N-(2-hydroxyethyl)-N-methyl-, acrylate (ester) (8CI); N-Methylperfluorooctanesulfonamidoethyl acrylate	C14 H10 F17 N O4 S	CN(CCOC(=O)C=C)S(=O)(=O)C(F)(F)C(F)(F)C(F)(F)C(F)(F)C(F)(F)C(F)(F)C(F)(F)C(F)(F)F	50698-49-2	203.03	perfluoroalkane sulfonyl (meth)acrylates	1	8	1	1	0	0	NA	0		CN(CCOC(=O)C=C)S(=O)(=O)C(F)(F)C(F)(F)C(F)(F)C(F)(F)C(F)(F)C(F)(F)C(F)(F)C(F)(F)F	CNCCOC(=O)C=C	S(=O)(=O)C(F)(F)C(F)(F)C(F)(F)C(F)(F)C(F)(F)C(F)(F)C(F)(F)C(F)(F)F	1	S(=O)(=O)			25268-77-3	CN(CCOC(=O)C=C)S(=O)(=O)C(F)(F)C(F)(F)C(F)(F)C(F)(F)C(F)(F)C(F)(F)C(F)(F)C(F)(F)F	RTJZWOGSCLVJLD-UHFFFAOYSA-N	Organic compounds	Organohalogen compounds	Alkyl halides	Alkyl fluorides	Perfluorooctane sulfonic acid and derivatives	This compound belongs to the class of organic compounds known as perfluorooctane sulfonic acid and derivatives. These are organic compounds containing an octyl chain attached to the sulfur of a sulfonic acid (or a derivative thereof), where all hydrogens of the octyl chain are replaced by fluorine atoms.	Aliphatic acyclic compounds	SMILES			25268-77-3	CN(CCOC(=O)C=C)S(=O)(=O)CCCCCCCC	OIPUWXWEUZXAOV-UHFFFAOYSA-N	Organic compounds	Organic acids and derivatives	Carboxylic acids and derivatives	Acrylic acids and derivatives	Acrylic acid esters	This compound belongs to the class of organic compounds known as acrylic acid esters. These are organic compounds containing and ester acrylic acid (CH2=CHC(=O)OH).	Aliphatic acyclic compounds	SMILES
2267	67584-61-6	2-Propenoic acid, 2-methyl-, 2-[methyl[(1,1,2,2,3,3,4,4,5,5,6,6,6-tridecafluorohexyl)sulfonyl]amino]ethyl ester	2-Propenoic acid, 2-methyl-, 2-[methyl[(tridecafluorohexyl)sulfonyl]amino]ethyl ester (9CI); [N-Methylperfluorohexane-1-sulfonamido]ethyl methacrylate	C13 H12 F13 N O4 S	CN(CCOC(=O)C(C)=C)S(=O)(=O)C(F)(F)C(F)(F)C(F)(F)C(F)(F)C(F)(F)C(F)(F)F		203.03	perfluoroalkane sulfonyl (meth)acrylates	1	6	1	1	0	0	NA	0		CN(CCOC(=O)C(C)=C)S(=O)(=O)C(F)(F)C(F)(F)C(F)(F)C(F)(F)C(F)(F)C(F)(F)F	CNCCOC(=O)C(C)=C	S(=O)(=O)C(F)(F)C(F)(F)C(F)(F)C(F)(F)C(F)(F)C(F)(F)F	1	S(=O)(=O)			67584-61-6	CN(CCOC(=O)C(C)=C)S(=O)(=O)C(F)(F)C(F)(F)C(F)(F)C(F)(F)C(F)(F)C(F)(F)F	MVZJFKDUUZOQFM-UHFFFAOYSA-N	Organic compounds	Organic acids and derivatives	Organic sulfonic acids and derivatives	Organosulfonic acids and derivatives	Organosulfonamides	This compound belongs to the class of organic compounds known as organosulfonamides. These are compounds containing the sulfonamide functional group, an amide of sulfonic acid with the general structure R1S(=O)2N(R2)R3 (R1=alkyl, aryl; R2,R3=H, alkyl, aryl).	Aliphatic acyclic compounds	SMILES			67584-61-6	CN(CCOC(=O)C(C)=C)S(=O)(=O)CCCCCC	RZDIZDOBUHNMIV-UHFFFAOYSA-N	Organic compounds	Organic acids and derivatives	Organic sulfonic acids and derivatives	Organosulfonic acids and derivatives	Organosulfonamides	This compound belongs to the class of organic compounds known as organosulfonamides. These are compounds containing the sulfonamide functional group, an amide of sulfonic acid with the general structure R1S(=O)2N(R2)R3 (R1=alkyl, aryl; R2,R3=H, alkyl, aryl).	Aliphatic acyclic compounds	SMILES
2271	38850-52-1	1-Propanaminium, 3-[(carboxymethyl)[(1,1,2,2,3,3,4,4,5,5,6,6,6-tridecafluorohexyl)sulfonyl]amino]-N,N,N-trimethyl-, inner salt	1-Propanaminium, 3-[(carboxymethyl)[(tridecafluorohexyl)sulfonyl]amino]-N,N,N-trimethyl-, hydroxide, inner salt; 1-Propanaminium, 3-[(carboxymethyl)[(tridecafluorohexyl)sulfonyl]amino]-N,N,N-trimethyl-, inner salt (9CI)	C14 H17 F13 N2 O4 S	C[N+](C)(C)CCCN(CC([O-])=O)S(=O)(=O)C(F)(F)C(F)(F)C(F)(F)C(F)(F)C(F)(F)C(F)(F)F		203	perfluoroalkane sulfonyl-based nonpolymers	0	6	1	1	0	0	NA	0		C[N+](C)(C)CCCN(CC([O-])=O)S(=O)(=O)C(F)(F)C(F)(F)C(F)(F)C(F)(F)C(F)(F)C(F)(F)F	C[N+](C)(C)CCCNCC([O-])=O	S(=O)(=O)C(F)(F)C(F)(F)C(F)(F)C(F)(F)C(F)(F)C(F)(F)F	1	S(=O)(=O)			38850-52-1	C[N+](C)(C)CCCN(CC([O-])=O)S(=O)(=O)C(F)(F)C(F)(F)C(F)(F)C(F)(F)C(F)(F)C(F)(F)F	PHLQZHXBMDKUNG-UHFFFAOYSA-N	Organic compounds	Organic acids and derivatives	Carboxylic acids and derivatives	Amino acids, peptides, and analogues	Alpha amino acids and derivatives	This compound belongs to the class of organic compounds known as alpha amino acids and derivatives. These are amino acids in which the amino group is attached to the carbon atom immediately adjacent to the carboxylate group (alpha carbon), or a derivative thereof.	Aliphatic acyclic compounds	SMILES			38850-52-1	C[N+](C)(C)CCCN(CC([O-])=O)S(=O)(=O)CCCCCC	FNNMVKMJAYLWMG-UHFFFAOYSA-N	Organic compounds	Organic acids and derivatives	Carboxylic acids and derivatives	Amino acids, peptides, and analogues	Alpha amino acids and derivatives	This compound belongs to the class of organic compounds known as alpha amino acids and derivatives. These are amino acids in which the amino group is attached to the carbon atom immediately adjacent to the carboxylate group (alpha carbon), or a derivative thereof.	Aliphatic acyclic compounds	SMILES
2277	1893-52-3	2-Propenoic acid, 2-[ethyl[(1,1,2,2,3,3,4,4,5,5,6,6,6-tridecafluorohexyl)sulfonyl]amino]ethyl ester	1-Hexanesulfonamide, N-ethyl-1,1,2,2,3,3,4,4,5,5,6,6,6-tridecafluoro-N-2-hydroxyethyl-, acrylate (6CI); 2-Propenoic acid, 2-[ethyl[(tridecafluorohexyl)sulfonyl]amino]ethyl ester (9CI)	C13 H12 F13 N O4 S	CCN(CCOC(=O)C=C)S(=O)(=O)C(F)(F)C(F)(F)C(F)(F)C(F)(F)C(F)(F)C(F)(F)F		203.03	perfluoroalkane sulfonyl (meth)acrylates	1	6	1	1	0	0	NA	0		CCN(CCOC(=O)C=C)S(=O)(=O)C(F)(F)C(F)(F)C(F)(F)C(F)(F)C(F)(F)C(F)(F)F	CCNCCOC(=O)C=C	S(=O)(=O)C(F)(F)C(F)(F)C(F)(F)C(F)(F)C(F)(F)C(F)(F)F	1	S(=O)(=O)			1893-52-3	CCN(CCOC(=O)C=C)S(=O)(=O)C(F)(F)C(F)(F)C(F)(F)C(F)(F)C(F)(F)C(F)(F)F	QJRQXQMZXHXNPA-UHFFFAOYSA-N	Organic compounds	Organic acids and derivatives	Carboxylic acids and derivatives	Acrylic acids and derivatives	Acrylic acid esters	This compound belongs to the class of organic compounds known as acrylic acid esters. These are organic compounds containing and ester acrylic acid (CH2=CHC(=O)OH).	Aliphatic acyclic compounds	SMILES			1893-52-3	CCN(CCOC(=O)C=C)S(=O)(=O)CCCCCC	DSIXFDLAJINNDA-UHFFFAOYSA-N	Organic compounds	Organic acids and derivatives	Carboxylic acids and derivatives	Acrylic acids and derivatives	Acrylic acid esters	This compound belongs to the class of organic compounds known as acrylic acid esters. These are organic compounds containing and ester acrylic acid (CH2=CHC(=O)OH).	Aliphatic acyclic compounds	SMILES
2278	38850-60-1	1-Propanesulfonic acid, 3-[[3-(dimethylamino)propyl][(1,1,2,2,3,3,4,4,5,5,6,6,6-tridecafluorohexyl)sulfonyl]amino]-	1-Propanesulfonic acid, 3-[[3-(dimethylamino)propyl][(tridecafluorohexyl)sulfonyl]amino]- (9CI); 3-[[3-(Dimethylamino)propyl][(1,1,2,2,3,3,4,4,5,5,6,6,6-tridecafluorohexyl)sulfonyl]amino]-1-propanesulfonic acid	C14 H19 F13 N2 O5 S2	CN(C)CCCN(CCCS(O)(=O)=O)S(=O)(=O)C(F)(F)C(F)(F)C(F)(F)C(F)(F)C(F)(F)C(F)(F)F		203	perfluoroalkane sulfonyl-based nonpolymers	0	6	1	1	0	0	NA	0		CN(C)CCCN(CCCS(O)(=O)=O)S(=O)(=O)C(F)(F)C(F)(F)C(F)(F)C(F)(F)C(F)(F)C(F)(F)F	CN(C)CCCNCCCS(O)(=O)=O	S(=O)(=O)C(F)(F)C(F)(F)C(F)(F)C(F)(F)C(F)(F)C(F)(F)F	1	S(=O)(=O)			38850-60-1	CN(C)CCCN(CCCS(O)(=O)=O)S(=O)(=O)C(F)(F)C(F)(F)C(F)(F)C(F)(F)C(F)(F)C(F)(F)F	XXEJCEXMBHWWLY-UHFFFAOYSA-N	Organic compounds	Organic acids and derivatives	Organic sulfonic acids and derivatives	Organosulfonic acids and derivatives	Organosulfonamides	This compound belongs to the class of organic compounds known as organosulfonamides. These are compounds containing the sulfonamide functional group, an amide of sulfonic acid with the general structure R1S(=O)2N(R2)R3 (R1=alkyl, aryl; R2,R3=H, alkyl, aryl).	Aliphatic acyclic compounds	SMILES			38850-60-1	CN(C)CCCN(CCCS(O)(=O)=O)S(=O)(=O)CCCCCC	SWLKKRPLFPTJCG-UHFFFAOYSA-N	Organic compounds	Organic acids and derivatives	Organic sulfonic acids and derivatives	Organosulfonic acids and derivatives	Organosulfonamides	This compound belongs to the class of organic compounds known as organosulfonamides. These are compounds containing the sulfonamide functional group, an amide of sulfonic acid with the general structure R1S(=O)2N(R2)R3 (R1=alkyl, aryl; R2,R3=H, alkyl, aryl).	Aliphatic acyclic compounds	SMILES
2290	423-82-5	2-Propenoic acid, 2-[ethyl[(1,1,2,2,3,3,4,4,5,5,6,6,7,7,8,8,8-heptadecafluorooctyl)sulfonyl]amino]ethyl ester	1-Octanesulfonamide, N-ethyl-1,1,2,2,3,3,4,4,5,5,6,6,7,7,8,8,8-heptadecafluoro-N-(2-hydroxyethyl)-, acrylate (6CI); 2-Propenoic acid, 2-[ethyl[(heptadecafluorooctyl)sulfonyl]amino]ethyl ester (9CI); Acrylic acid, ester with N-ethyl-1,1,2,2,3,3,4,4,5,5,6,6,7,7,8,8,8-heptadecafluoro-N-(2-hydroxyethyl)-1-octanesulfonamide (8CI); Acrylic acid, ester with N-ethyl-1,1,2,2,3,3,4,4,5,5,6,6,7,7,8,8,8-hept…	C15 H12 F17 N O4 S	CCN(CCOC(=O)C=C)S(=O)(=O)C(F)(F)C(F)(F)C(F)(F)C(F)(F)C(F)(F)C(F)(F)C(F)(F)C(F)(F)F		203.03	perfluoroalkane sulfonyl (meth)acrylates	1	8	1	1	0	0	NA	0		CCN(CCOC(=O)C=C)S(=O)(=O)C(F)(F)C(F)(F)C(F)(F)C(F)(F)C(F)(F)C(F)(F)C(F)(F)C(F)(F)F	CCNCCOC(=O)C=C	S(=O)(=O)C(F)(F)C(F)(F)C(F)(F)C(F)(F)C(F)(F)C(F)(F)C(F)(F)C(F)(F)F	1	S(=O)(=O)			423-82-5	CCN(CCOC(=O)C=C)S(=O)(=O)C(F)(F)C(F)(F)C(F)(F)C(F)(F)C(F)(F)C(F)(F)C(F)(F)C(F)(F)F	ZAZJGBCGMUKZEL-UHFFFAOYSA-N	Organic compounds	Organohalogen compounds	Alkyl halides	Alkyl fluorides	Perfluorooctane sulfonic acid and derivatives	This compound belongs to the class of organic compounds known as perfluorooctane sulfonic acid and derivatives. These are organic compounds containing an octyl chain attached to the sulfur of a sulfonic acid (or a derivative thereof), where all hydrogens of the octyl chain are replaced by fluorine atoms.	Aliphatic acyclic compounds	SMILES			423-82-5	CCN(CCOC(=O)C=C)S(=O)(=O)CCCCCCCC	XARUEMBDEBTONJ-UHFFFAOYSA-N	Organic compounds	Organic acids and derivatives	Carboxylic acids and derivatives	Acrylic acids and derivatives	Acrylic acid esters	This compound belongs to the class of organic compounds known as acrylic acid esters. These are organic compounds containing and ester acrylic acid (CH2=CHC(=O)OH).	Aliphatic acyclic compounds	SMILES
2292	14650-24-9	2-Propenoic acid, 2-methyl-, 2-[[(1,1,2,2,3,3,4,4,5,5,6,6,7,7,8,8,8-heptadecafluorooctyl)sulfonyl]methylamino]ethyl ester	2-Propenoic acid, 2-methyl-, 2-[[(heptadecafluorooctyl)sulfonyl]methylamino]ethyl ester (9CI); Methacrylic acid, ester with 1,1,2,2,3,3,4,4,5,5,6,6,7,7,8,8,8-heptadecafluoro-N-(2-hydroxyethyl)-N-methyl-1-octanesulfonamide (7CI,8CI); 1-Octanesulfonamide, 1,1,2,2,3,3,4,4,5,5,6,6,7,7,8,8,8-heptadecafluoro-N-(2-hydroxyethyl)-N-methyl-, methacrylate (ester) (8CI)	C15 H12 F17 N O4 S	CN(CCOC(=O)C(C)=C)S(=O)(=O)C(F)(F)C(F)(F)C(F)(F)C(F)(F)C(F)(F)C(F)(F)C(F)(F)C(F)(F)F	117786-47-7	203.03	perfluoroalkane sulfonyl (meth)acrylates	1	8	1	1	0	0	NA	0		CN(CCOC(=O)C(C)=C)S(=O)(=O)C(F)(F)C(F)(F)C(F)(F)C(F)(F)C(F)(F)C(F)(F)C(F)(F)C(F)(F)F	CNCCOC(=O)C(C)=C	S(=O)(=O)C(F)(F)C(F)(F)C(F)(F)C(F)(F)C(F)(F)C(F)(F)C(F)(F)C(F)(F)F	1	S(=O)(=O)			14650-24-9	CN(CCOC(=O)C(C)=C)S(=O)(=O)C(F)(F)C(F)(F)C(F)(F)C(F)(F)C(F)(F)C(F)(F)C(F)(F)C(F)(F)F	UZMOXNBUTMPDCX-UHFFFAOYSA-N	Organic compounds	Organohalogen compounds	Alkyl halides	Alkyl fluorides	Perfluorooctane sulfonic acid and derivatives	This compound belongs to the class of organic compounds known as perfluorooctane sulfonic acid and derivatives. These are organic compounds containing an octyl chain attached to the sulfur of a sulfonic acid (or a derivative thereof), where all hydrogens of the octyl chain are replaced by fluorine atoms.	Aliphatic acyclic compounds	SMILES			14650-24-9	CN(CCOC(=O)C(C)=C)S(=O)(=O)CCCCCCCC	BFTDRXIPWARPHW-UHFFFAOYSA-N	Organic compounds	Organic acids and derivatives	Organic sulfonic acids and derivatives	Organosulfonic acids and derivatives	Organosulfonamides	This compound belongs to the class of organic compounds known as organosulfonamides. These are compounds containing the sulfonamide functional group, an amide of sulfonic acid with the general structure R1S(=O)2N(R2)R3 (R1=alkyl, aryl; R2,R3=H, alkyl, aryl).	Aliphatic acyclic compounds	SMILES
2293	#VALUE!	2-Propenoic acid, 2-[ethyl[(1,1,2,2,3,3,4,4,5,5,6,6,7,7,7-pentadecafluoroheptyl)sulfonyl]amino]ethyl ester	2-Propenoic acid, 2-[ethyl[(pentadecafluoroheptyl)sulfonyl]amino]ethyl ester (9CI)	C14 H12 F15 N O4 S	CCN(CCOC(=O)C=C)S(=O)(=O)C(F)(F)C(F)(F)C(F)(F)C(F)(F)C(F)(F)C(F)(F)C(F)(F)F		203.03	perfluoroalkane sulfonyl (meth)acrylates	1	7	1	1	0	0	NA	0		CCN(CCOC(=O)C=C)S(=O)(=O)C(F)(F)C(F)(F)C(F)(F)C(F)(F)C(F)(F)C(F)(F)C(F)(F)F	CCNCCOC(=O)C=C	S(=O)(=O)C(F)(F)C(F)(F)C(F)(F)C(F)(F)C(F)(F)C(F)(F)C(F)(F)F	1	S(=O)(=O)			#VALUE!	CCN(CCOC(=O)C=C)S(=O)(=O)C(F)(F)C(F)(F)C(F)(F)C(F)(F)C(F)(F)C(F)(F)C(F)(F)F	IIEYFHNUKYSWAV-UHFFFAOYSA-N	Organic compounds	Organic acids and derivatives	Carboxylic acids and derivatives	Acrylic acids and derivatives	Acrylic acid esters	This compound belongs to the class of organic compounds known as acrylic acid esters. These are organic compounds containing and ester acrylic acid (CH2=CHC(=O)OH).	Aliphatic acyclic compounds	SMILES			#VALUE!	CCN(CCOC(=O)C=C)S(=O)(=O)CCCCCCC	HIXTXHASERUQGN-UHFFFAOYSA-N	Organic compounds	Organic acids and derivatives	Carboxylic acids and derivatives	Acrylic acids and derivatives	Acrylic acid esters	This compound belongs to the class of organic compounds known as acrylic acid esters. These are organic compounds containing and ester acrylic acid (CH2=CHC(=O)OH).	Aliphatic acyclic compounds	SMILES
2294	61577-14-8	2-Propenoic acid, 2-methyl-, 4-[[(1,1,2,2,3,3,4,4,5,5,6,6,7,7,8,8,8-heptadecafluorooctyl)sulfonyl]methylamino]butyl ester	2-Propenoic acid, 2-methyl-, 4-[[(heptadecafluorooctyl)sulfonyl]methylamino]butyl ester (9CI)	C17 H16 F17 N O4 S	CN(CCCCOC(=O)C(C)=C)S(=O)(=O)C(F)(F)C(F)(F)C(F)(F)C(F)(F)C(F)(F)C(F)(F)C(F)(F)C(F)(F)F		203.03	perfluoroalkane sulfonyl (meth)acrylates	1	8	1	1	0	0	NA	0		CN(CCCCOC(=O)C(C)=C)S(=O)(=O)C(F)(F)C(F)(F)C(F)(F)C(F)(F)C(F)(F)C(F)(F)C(F)(F)C(F)(F)F	CNCCCCOC(=O)C(C)=C	S(=O)(=O)C(F)(F)C(F)(F)C(F)(F)C(F)(F)C(F)(F)C(F)(F)C(F)(F)C(F)(F)F	1	S(=O)(=O)			61577-14-8	CN(CCCCOC(=O)C(C)=C)S(=O)(=O)C(F)(F)C(F)(F)C(F)(F)C(F)(F)C(F)(F)C(F)(F)C(F)(F)C(F)(F)F	DJKGXDGHCIHDPZ-UHFFFAOYSA-N	Organic compounds	Organohalogen compounds	Alkyl halides	Alkyl fluorides	Perfluorooctane sulfonic acid and derivatives	This compound belongs to the class of organic compounds known as perfluorooctane sulfonic acid and derivatives. These are organic compounds containing an octyl chain attached to the sulfur of a sulfonic acid (or a derivative thereof), where all hydrogens of the octyl chain are replaced by fluorine atoms.	Aliphatic acyclic compounds	SMILES			61577-14-8	CN(CCCCOC(=O)C(C)=C)S(=O)(=O)CCCCCCCC	VHDLRYHSHYKEGJ-UHFFFAOYSA-N	Organic compounds	Organic acids and derivatives	Organic sulfonic acids and derivatives	Organosulfonic acids and derivatives	Organosulfonamides	This compound belongs to the class of organic compounds known as organosulfonamides. These are compounds containing the sulfonamide functional group, an amide of sulfonic acid with the general structure R1S(=O)2N(R2)R3 (R1=alkyl, aryl; R2,R3=H, alkyl, aryl).	Aliphatic acyclic compounds	SMILES
2295	67906-73-4	2-Propenoic acid, 2-methyl-, 2-[ethyl[(1,1,2,2,3,3,4,4,5,5,5-undecafluoropentyl)sulfonyl]amino]ethyl ester	2-Propenoic acid, 2-methyl-, 2-[ethyl[(undecafluoropentyl)sulfonyl]amino]ethyl ester (9CI)	C13 H14 F11 N O4 S	CCN(CCOC(=O)C(C)=C)S(=O)(=O)C(F)(F)C(F)(F)C(F)(F)C(F)(F)C(F)(F)F		203.03	perfluoroalkane sulfonyl (meth)acrylates	1	5	1	1	0	0	NA	0		CCN(CCOC(=O)C(C)=C)S(=O)(=O)C(F)(F)C(F)(F)C(F)(F)C(F)(F)C(F)(F)F	CCNCCOC(=O)C(C)=C	S(=O)(=O)C(F)(F)C(F)(F)C(F)(F)C(F)(F)C(F)(F)F	1	S(=O)(=O)			67906-73-4	CCN(CCOC(=O)C(C)=C)S(=O)(=O)C(F)(F)C(F)(F)C(F)(F)C(F)(F)C(F)(F)F	WGAZHHCZKIWWFF-UHFFFAOYSA-N	Organic compounds	Organic acids and derivatives	Organic sulfonic acids and derivatives	Organosulfonic acids and derivatives	Organosulfonamides	This compound belongs to the class of organic compounds known as organosulfonamides. These are compounds containing the sulfonamide functional group, an amide of sulfonic acid with the general structure R1S(=O)2N(R2)R3 (R1=alkyl, aryl; R2,R3=H, alkyl, aryl).	Aliphatic acyclic compounds	SMILES			67906-73-4	CCN(CCOC(=O)C(C)=C)S(=O)(=O)CCCCC	QAXUSCHWKOGMBX-UHFFFAOYSA-N	Organic compounds	Organic acids and derivatives	Organic sulfonic acids and derivatives	Organosulfonic acids and derivatives	Organosulfonamides	This compound belongs to the class of organic compounds known as organosulfonamides. These are compounds containing the sulfonamide functional group, an amide of sulfonic acid with the general structure R1S(=O)2N(R2)R3 (R1=alkyl, aryl; R2,R3=H, alkyl, aryl).	Aliphatic acyclic compounds	SMILES
2296	67939-96-2	2-Propenoic acid, 2-methyl-, 2-[methyl[(1,1,2,2,3,3,4,4,5,5,6,6,7,7,7-pentadecafluoroheptyl)sulfonyl]amino]ethyl ester	2-Propenoic acid, 2-methyl-, 2-[methyl[(pentadecafluoroheptyl)sulfonyl]amino]ethyl ester (9CI)	C14 H12 F15 N O4 S	CN(CCOC(=O)C(C)=C)S(=O)(=O)C(F)(F)C(F)(F)C(F)(F)C(F)(F)C(F)(F)C(F)(F)C(F)(F)F		203.03	perfluoroalkane sulfonyl (meth)acrylates	1	7	1	1	0	0	NA	0		CN(CCOC(=O)C(C)=C)S(=O)(=O)C(F)(F)C(F)(F)C(F)(F)C(F)(F)C(F)(F)C(F)(F)C(F)(F)F	CNCCOC(=O)C(C)=C	S(=O)(=O)C(F)(F)C(F)(F)C(F)(F)C(F)(F)C(F)(F)C(F)(F)C(F)(F)F	1	S(=O)(=O)			67939-96-2	CN(CCOC(=O)C(C)=C)S(=O)(=O)C(F)(F)C(F)(F)C(F)(F)C(F)(F)C(F)(F)C(F)(F)C(F)(F)F	RZDRSPQHQWHCKI-UHFFFAOYSA-N	Organic compounds	Organic acids and derivatives	Organic sulfonic acids and derivatives	Organosulfonic acids and derivatives	Organosulfonamides	This compound belongs to the class of organic compounds known as organosulfonamides. These are compounds containing the sulfonamide functional group, an amide of sulfonic acid with the general structure R1S(=O)2N(R2)R3 (R1=alkyl, aryl; R2,R3=H, alkyl, aryl).	Aliphatic acyclic compounds	SMILES			67939-96-2	CN(CCOC(=O)C(C)=C)S(=O)(=O)CCCCCCC	FKGRZADDAPWRRU-UHFFFAOYSA-N	Organic compounds	Organic acids and derivatives	Organic sulfonic acids and derivatives	Organosulfonic acids and derivatives	Organosulfonamides	This compound belongs to the class of organic compounds known as organosulfonamides. These are compounds containing the sulfonamide functional group, an amide of sulfonic acid with the general structure R1S(=O)2N(R2)R3 (R1=alkyl, aryl; R2,R3=H, alkyl, aryl).	Aliphatic acyclic compounds	SMILES
2302	67906-70-1	2-Propenoic acid, 2-methyl-, 2-[ethyl[(1,1,2,2,3,3,4,4,5,5,6,6,6-tridecafluorohexyl)sulfonyl]amino]ethyl ester	2-Propenoic acid, 2-methyl-, 2-[ethyl[(tridecafluorohexyl)sulfonyl]amino]ethyl ester (9CI)	C14 H14 F13 N O4 S	CCN(CCOC(=O)C(C)=C)S(=O)(=O)C(F)(F)C(F)(F)C(F)(F)C(F)(F)C(F)(F)C(F)(F)F		203.03	perfluoroalkane sulfonyl (meth)acrylates	1	6	1	1	0	0	NA	0		CCN(CCOC(=O)C(C)=C)S(=O)(=O)C(F)(F)C(F)(F)C(F)(F)C(F)(F)C(F)(F)C(F)(F)F	CCNCCOC(=O)C(C)=C	S(=O)(=O)C(F)(F)C(F)(F)C(F)(F)C(F)(F)C(F)(F)C(F)(F)F	1	S(=O)(=O)			67906-70-1	CCN(CCOC(=O)C(C)=C)S(=O)(=O)C(F)(F)C(F)(F)C(F)(F)C(F)(F)C(F)(F)C(F)(F)F	HCLVYCJMWIGREO-UHFFFAOYSA-N	Organic compounds	Organic acids and derivatives	Organic sulfonic acids and derivatives	Organosulfonic acids and derivatives	Organosulfonamides	This compound belongs to the class of organic compounds known as organosulfonamides. These are compounds containing the sulfonamide functional group, an amide of sulfonic acid with the general structure R1S(=O)2N(R2)R3 (R1=alkyl, aryl; R2,R3=H, alkyl, aryl).	Aliphatic acyclic compounds	SMILES			67906-70-1	CCN(CCOC(=O)C(C)=C)S(=O)(=O)CCCCCC	NROXRBWDOMBENE-UHFFFAOYSA-N	Organic compounds	Organic acids and derivatives	Organic sulfonic acids and derivatives	Organosulfonic acids and derivatives	Organosulfonamides	This compound belongs to the class of organic compounds known as organosulfonamides. These are compounds containing the sulfonamide functional group, an amide of sulfonic acid with the general structure R1S(=O)2N(R2)R3 (R1=alkyl, aryl; R2,R3=H, alkyl, aryl).	Aliphatic acyclic compounds	SMILES
2306	2357-60-0	2-Propenoic acid, 2-[[(1,1,2,2,3,3,4,4,5,5,6,6,7,7,8,8,8-heptadecafluorooctyl)sulfonyl]propylamino]ethyl ester	2-Propenoic acid, 2-[[(heptadecafluorooctyl)sulfonyl]propylamino]ethyl ester (9CI); Acrylic acid, 2-(1,1,2,2,3,3,4,4,5,5,6,6,7,7,8,8,8-heptadecafluoro-N-propyl-1-octanesulfonamido)ethyl ester (6CI); Acrylic acid, ester with 1,1,2,2,3,3,4,4,5,5,6,6,7,7,8,8,8-heptadecafluoro-N-(2-hydroxyethyl)-N-propyl-1-octanesulfonamide (7CI,8CI); 1-Octanesulfonamide, 1,1,2,2,3,3,4,4,5,5,6,6,7,7,8,8,8-heptadecafl…	C16 H14 F17 N O4 S	CCCN(CCOC(=O)C=C)S(=O)(=O)C(F)(F)C(F)(F)C(F)(F)C(F)(F)C(F)(F)C(F)(F)C(F)(F)C(F)(F)F	45314-87-2, 402829-59-8	203.03	perfluoroalkane sulfonyl (meth)acrylates	1	8	1	1	0	0	NA	0		CCCN(CCOC(=O)C=C)S(=O)(=O)C(F)(F)C(F)(F)C(F)(F)C(F)(F)C(F)(F)C(F)(F)C(F)(F)C(F)(F)F	CCCNCCOC(=O)C=C	S(=O)(=O)C(F)(F)C(F)(F)C(F)(F)C(F)(F)C(F)(F)C(F)(F)C(F)(F)C(F)(F)F	1	S(=O)(=O)			2357-60-0	CCCN(CCOC(=O)C=C)S(=O)(=O)C(F)(F)C(F)(F)C(F)(F)C(F)(F)C(F)(F)C(F)(F)C(F)(F)C(F)(F)F	CZDIKJOTAVHOTJ-UHFFFAOYSA-N	Organic compounds	Organohalogen compounds	Alkyl halides	Alkyl fluorides	Perfluorooctane sulfonic acid and derivatives	This compound belongs to the class of organic compounds known as perfluorooctane sulfonic acid and derivatives. These are organic compounds containing an octyl chain attached to the sulfur of a sulfonic acid (or a derivative thereof), where all hydrogens of the octyl chain are replaced by fluorine atoms.	Aliphatic acyclic compounds	SMILES			2357-60-0	CCCN(CCOC(=O)C=C)S(=O)(=O)CCCCCCCC	XSSJXRPMTMZIJN-UHFFFAOYSA-N	Organic compounds	Organic acids and derivatives	Carboxylic acids and derivatives	Acrylic acids and derivatives	Acrylic acid esters	This compound belongs to the class of organic compounds known as acrylic acid esters. These are organic compounds containing and ester acrylic acid (CH2=CHC(=O)OH).	Aliphatic acyclic compounds	SMILES
2308	67939-36-0	2-Propenoic acid, 2-methyl-, 2-[ethyl[(1,1,2,2,3,3,4,4,5,5,6,6,7,7,7-pentadecafluoroheptyl)sulfonyl]amino]ethyl ester	2-Propenoic acid, 2-methyl-, 2-[ethyl[(pentadecafluoroheptyl)sulfonyl]amino]ethyl ester (9CI)	C15 H14 F15 N O4 S	CCN(CCOC(=O)C(C)=C)S(=O)(=O)C(F)(F)C(F)(F)C(F)(F)C(F)(F)C(F)(F)C(F)(F)C(F)(F)F		203.03	perfluoroalkane sulfonyl (meth)acrylates	1	7	1	1	0	0	NA	0		CCN(CCOC(=O)C(C)=C)S(=O)(=O)C(F)(F)C(F)(F)C(F)(F)C(F)(F)C(F)(F)C(F)(F)C(F)(F)F	CCNCCOC(=O)C(C)=C	S(=O)(=O)C(F)(F)C(F)(F)C(F)(F)C(F)(F)C(F)(F)C(F)(F)C(F)(F)F	1	S(=O)(=O)			67939-36-0	CCN(CCOC(=O)C(C)=C)S(=O)(=O)C(F)(F)C(F)(F)C(F)(F)C(F)(F)C(F)(F)C(F)(F)C(F)(F)F	VOQYRTHXEXILMW-UHFFFAOYSA-N	Organic compounds	Organic acids and derivatives	Organic sulfonic acids and derivatives	Organosulfonic acids and derivatives	Organosulfonamides	This compound belongs to the class of organic compounds known as organosulfonamides. These are compounds containing the sulfonamide functional group, an amide of sulfonic acid with the general structure R1S(=O)2N(R2)R3 (R1=alkyl, aryl; R2,R3=H, alkyl, aryl).	Aliphatic acyclic compounds	SMILES			67939-36-0	CCN(CCOC(=O)C(C)=C)S(=O)(=O)CCCCCCC	PDWMTODAPVNJSK-UHFFFAOYSA-N	Organic compounds	Organic acids and derivatives	Organic sulfonic acids and derivatives	Organosulfonic acids and derivatives	Organosulfonamides	This compound belongs to the class of organic compounds known as organosulfonamides. These are compounds containing the sulfonamide functional group, an amide of sulfonic acid with the general structure R1S(=O)2N(R2)R3 (R1=alkyl, aryl; R2,R3=H, alkyl, aryl).	Aliphatic acyclic compounds	SMILES
2310	376-14-7	2-Propenoic acid, 2-methyl-, 2-[ethyl[(1,1,2,2,3,3,4,4,5,5,6,6,7,7,8,8,8-heptadecafluorooctyl)sulfonyl]amino]ethyl ester	2-Propenoic acid, 2-methyl-, 2-[ethyl[(heptadecafluorooctyl)sulfonyl]amino]ethyl ester (9CI); Methacrylic acid, 2-(N-ethyl-1,1,2,2,3,3,4,4,5,5,6,6,7,7,8,8,8-heptadecafluoro-1-octanesulfonamido)ethyl ester (6CI); Methacrylic acid, ester with N-ethyl-1,1,2,2,3,3,4,4,5,5,6,6,7,7,8,8,8-heptadecafluoro-N-(2-hydroxyethyl)-1-octanesulfonamide (7CI,8CI); 1-Octanesulfonamide, N-ethyl-1,1,2,2,3,3,4,4,5,5,6…	C16 H14 F17 N O4 S	CCN(CCOC(=O)C(C)=C)S(=O)(=O)C(F)(F)C(F)(F)C(F)(F)C(F)(F)C(F)(F)C(F)(F)C(F)(F)C(F)(F)F	123174-42-5	203.03	perfluoroalkane sulfonyl (meth)acrylates	1	8	1	1	0	0	NA	0		CCN(CCOC(=O)C(C)=C)S(=O)(=O)C(F)(F)C(F)(F)C(F)(F)C(F)(F)C(F)(F)C(F)(F)C(F)(F)C(F)(F)F	CCNCCOC(=O)C(C)=C	S(=O)(=O)C(F)(F)C(F)(F)C(F)(F)C(F)(F)C(F)(F)C(F)(F)C(F)(F)C(F)(F)F	1	S(=O)(=O)			376-14-7	CCN(CCOC(=O)C(C)=C)S(=O)(=O)C(F)(F)C(F)(F)C(F)(F)C(F)(F)C(F)(F)C(F)(F)C(F)(F)C(F)(F)F	DBCGADAHIXJHCE-UHFFFAOYSA-N	Organic compounds	Organohalogen compounds	Alkyl halides	Alkyl fluorides	Perfluorooctane sulfonic acid and derivatives	This compound belongs to the class of organic compounds known as perfluorooctane sulfonic acid and derivatives. These are organic compounds containing an octyl chain attached to the sulfur of a sulfonic acid (or a derivative thereof), where all hydrogens of the octyl chain are replaced by fluorine atoms.	Aliphatic acyclic compounds	SMILES			376-14-7	CCN(CCOC(=O)C(C)=C)S(=O)(=O)CCCCCCCC	GRLDPKBCWGWAOK-UHFFFAOYSA-N	Organic compounds	Organic acids and derivatives	Organic sulfonic acids and derivatives	Organosulfonic acids and derivatives	Organosulfonamides	This compound belongs to the class of organic compounds known as organosulfonamides. These are compounds containing the sulfonamide functional group, an amide of sulfonic acid with the general structure R1S(=O)2N(R2)R3 (R1=alkyl, aryl; R2,R3=H, alkyl, aryl).	Aliphatic acyclic compounds	SMILES
2319	68298-60-2	2-Propenoic acid, 2-[butyl[(1,1,2,2,3,3,4,4,5,5,6,6,7,7,7-pentadecafluoroheptyl)sulfonyl]amino]ethyl ester	2-Propenoic acid, 2-[butyl[(pentadecafluoroheptyl)sulfonyl]amino]ethyl ester (9CI)	C16 H16 F15 N O4 S	CCCCN(CCOC(=O)C=C)S(=O)(=O)C(F)(F)C(F)(F)C(F)(F)C(F)(F)C(F)(F)C(F)(F)C(F)(F)F		203.03	perfluoroalkane sulfonyl (meth)acrylates	1	7	1	1	0	0	NA	0		CCCCN(CCOC(=O)C=C)S(=O)(=O)C(F)(F)C(F)(F)C(F)(F)C(F)(F)C(F)(F)C(F)(F)C(F)(F)F	CCCCNCCOC(=O)C=C	S(=O)(=O)C(F)(F)C(F)(F)C(F)(F)C(F)(F)C(F)(F)C(F)(F)C(F)(F)F	1	S(=O)(=O)			68298-60-2	CCCCN(CCOC(=O)C=C)S(=O)(=O)C(F)(F)C(F)(F)C(F)(F)C(F)(F)C(F)(F)C(F)(F)C(F)(F)F	ZGQOMXKQOOGSHP-UHFFFAOYSA-N	Organic compounds	Organic acids and derivatives	Carboxylic acids and derivatives	Acrylic acids and derivatives	Acrylic acid esters	This compound belongs to the class of organic compounds known as acrylic acid esters. These are organic compounds containing and ester acrylic acid (CH2=CHC(=O)OH).	Aliphatic acyclic compounds	SMILES			68298-60-2	CCCCN(CCOC(=O)C=C)S(=O)(=O)CCCCCCC	YNHHEYZQXOJPHJ-UHFFFAOYSA-N	Organic compounds	Organic acids and derivatives	Carboxylic acids and derivatives	Acrylic acids and derivatives	Acrylic acid esters	This compound belongs to the class of organic compounds known as acrylic acid esters. These are organic compounds containing and ester acrylic acid (CH2=CHC(=O)OH).	Aliphatic acyclic compounds	SMILES
2322	0383-07-03	2-Propenoic acid, 2-[butyl[(1,1,2,2,3,3,4,4,5,5,6,6,7,7,8,8,8-heptadecafluorooctyl)sulfonyl]amino]ethyl ester	1-Octanesulfonamide, N-butyl-1,1,2,2,3,3,4,4,5,5,6,6,7,7,8,8,8-heptadecafluoro-N-(2-hydroxyethyl)-, acrylate (ester) (8CI); 1-Octanesulfonamide, N-butyl-1,1,2,2,3,3,4,4,5,5,6,6,7,7,8,8,8-heptadecafluoro-N-2-hydroxyethyl-, acrylate (6CI); 2-Propenoic acid, 2-[butyl[(heptadecafluorooctyl)sulfonyl]amino]ethyl ester (9CI); 2-(N-Butylperfluorooctanesulfonamido)ethyl acrylate; FX 189; Fluorad FC 189; F…	C17 H16 F17 N O4 S	CCCCN(CCOC(=O)C=C)S(=O)(=O)C(F)(F)C(F)(F)C(F)(F)C(F)(F)C(F)(F)C(F)(F)C(F)(F)C(F)(F)F	121939-32-0	203.03	perfluoroalkane sulfonyl (meth)acrylates	1	8	1	1	0	0	NA	0		CCCCN(CCOC(=O)C=C)S(=O)(=O)C(F)(F)C(F)(F)C(F)(F)C(F)(F)C(F)(F)C(F)(F)C(F)(F)C(F)(F)F	CCCCNCCOC(=O)C=C	S(=O)(=O)C(F)(F)C(F)(F)C(F)(F)C(F)(F)C(F)(F)C(F)(F)C(F)(F)C(F)(F)F	1	S(=O)(=O)			0383-07-03	CCCCN(CCOC(=O)C=C)S(=O)(=O)C(F)(F)C(F)(F)C(F)(F)C(F)(F)C(F)(F)C(F)(F)C(F)(F)C(F)(F)F	AQQNNAXBGPWALO-UHFFFAOYSA-N	Organic compounds	Organohalogen compounds	Alkyl halides	Alkyl fluorides	Perfluorooctane sulfonic acid and derivatives	This compound belongs to the class of organic compounds known as perfluorooctane sulfonic acid and derivatives. These are organic compounds containing an octyl chain attached to the sulfur of a sulfonic acid (or a derivative thereof), where all hydrogens of the octyl chain are replaced by fluorine atoms.	Aliphatic acyclic compounds	SMILES			0383-07-03	CCCCN(CCOC(=O)C=C)S(=O)(=O)CCCCCCCC	XTVXCWJSUWSVET-UHFFFAOYSA-N	Organic compounds	Organic acids and derivatives	Carboxylic acids and derivatives	Acrylic acids and derivatives	Acrylic acid esters	This compound belongs to the class of organic compounds known as acrylic acid esters. These are organic compounds containing and ester acrylic acid (CH2=CHC(=O)OH).	Aliphatic acyclic compounds	SMILES
2326	38850-58-7	1-Propanaminium, N-(2-hydroxyethyl)-N,N-dimethyl-3-[(3-sulfopropyl)[(1,1,2,2,3,3,4,4,5,5,6,6,6-tridecafluorohexyl)sulfonyl]amino]-, inner salt	1-Propanaminium, N-(2-hydroxyethyl)-N,N-dimethyl-3-[(3-sulfopropyl)[(tridecafluorohexyl)sulfonyl]amino]-, hydroxide, inner salt; 1-Propanaminium, N-(2-hydroxyethyl)-N,N-dimethyl-3-[(3-sulfopropyl)[(tridecafluorohexyl)sulfonyl]amino]-, inner salt (9CI)	C16 H23 F13 N2 O6 S2	C[N+](C)(CCO)CCCN(CCCS([O-])(=O)=O)S(=O)(=O)C(F)(F)C(F)(F)C(F)(F)C(F)(F)C(F)(F)C(F)(F)F		203	perfluoroalkane sulfonyl-based nonpolymers	0	6	1	1	0	0	NA	0		C[N+](C)(CCO)CCCN(CCCS([O-])(=O)=O)S(=O)(=O)C(F)(F)C(F)(F)C(F)(F)C(F)(F)C(F)(F)C(F)(F)F	C[N+](C)(CCO)CCCNCCCS([O-])(=O)=O	S(=O)(=O)C(F)(F)C(F)(F)C(F)(F)C(F)(F)C(F)(F)C(F)(F)F	1	S(=O)(=O)			38850-58-7	C[N+](C)(CCO)CCCN(CCCS([O-])(=O)=O)S(=O)(=O)C(F)(F)C(F)(F)C(F)(F)C(F)(F)C(F)(F)C(F)(F)F	WYFODDRZFDBDDF-UHFFFAOYSA-N	Organic compounds	Organic acids and derivatives	Organic sulfonic acids and derivatives	Organosulfonic acids and derivatives	Organosulfonamides	This compound belongs to the class of organic compounds known as organosulfonamides. These are compounds containing the sulfonamide functional group, an amide of sulfonic acid with the general structure R1S(=O)2N(R2)R3 (R1=alkyl, aryl; R2,R3=H, alkyl, aryl).	Aliphatic acyclic compounds	SMILES			38850-58-7	C[N+](C)(CCO)CCCN(CCCS([O-])(=O)=O)S(=O)(=O)CCCCCC	MAGOQQXLXGEEBK-UHFFFAOYSA-N	Organic compounds	Organic acids and derivatives	Organic sulfonic acids and derivatives	Organosulfonic acids and derivatives	Organosulfonamides	This compound belongs to the class of organic compounds known as organosulfonamides. These are compounds containing the sulfonamide functional group, an amide of sulfonic acid with the general structure R1S(=O)2N(R2)R3 (R1=alkyl, aryl; R2,R3=H, alkyl, aryl).	Aliphatic acyclic compounds	SMILES
2329	13285-40-0	2-Propenoic acid, 2-methyl-, 2-[[(1,1,2,2,3,3,4,4,5,5,6,6,7,7,8,8,8-heptadecafluorooctyl)sulfonyl]propylamino]ethyl ester	2-Propenoic acid, 2-methyl-, 2-[[(heptadecafluorooctyl)sulfonyl]propylamino]ethyl ester (9CI); Methacrylic acid, ester with 1,1,2,2,3,3,4,4,5,5,6,6,7,7,8,8,8-heptadecafluoro-N-(2-hydroxyethyl)-N-propyloctanesulfonamide (8CI); EF 135M	C17 H16 F17 N O4 S	CCCN(CCOC(=O)C(C)=C)S(=O)(=O)C(F)(F)C(F)(F)C(F)(F)C(F)(F)C(F)(F)C(F)(F)C(F)(F)C(F)(F)F	98266-54-7	203.03	perfluoroalkane sulfonyl (meth)acrylates	1	8	1	1	0	0	NA	0		CCCN(CCOC(=O)C(C)=C)S(=O)(=O)C(F)(F)C(F)(F)C(F)(F)C(F)(F)C(F)(F)C(F)(F)C(F)(F)C(F)(F)F	CCCNCCOC(=O)C(C)=C	S(=O)(=O)C(F)(F)C(F)(F)C(F)(F)C(F)(F)C(F)(F)C(F)(F)C(F)(F)C(F)(F)F	1	S(=O)(=O)			13285-40-0	CCCN(CCOC(=O)C(C)=C)S(=O)(=O)C(F)(F)C(F)(F)C(F)(F)C(F)(F)C(F)(F)C(F)(F)C(F)(F)C(F)(F)F	XBWYIWRSPVIPCH-UHFFFAOYSA-N	Organic compounds	Organohalogen compounds	Alkyl halides	Alkyl fluorides	Perfluorooctane sulfonic acid and derivatives	This compound belongs to the class of organic compounds known as perfluorooctane sulfonic acid and derivatives. These are organic compounds containing an octyl chain attached to the sulfur of a sulfonic acid (or a derivative thereof), where all hydrogens of the octyl chain are replaced by fluorine atoms.	Aliphatic acyclic compounds	SMILES			13285-40-0	CCCN(CCOC(=O)C(C)=C)S(=O)(=O)CCCCCCCC	KDEBYLLBAGTVRC-UHFFFAOYSA-N	Organic compounds	Organic acids and derivatives	Organic sulfonic acids and derivatives	Organosulfonic acids and derivatives	Organosulfonamides	This compound belongs to the class of organic compounds known as organosulfonamides. These are compounds containing the sulfonamide functional group, an amide of sulfonic acid with the general structure R1S(=O)2N(R2)R3 (R1=alkyl, aryl; R2,R3=H, alkyl, aryl).	Aliphatic acyclic compounds	SMILES
2339	#VALUE!	1-Propanaminium, 3-[[(1,1,2,2,3,3,4,4,5,5,6,6,7,7,8,8,8-heptadecafluorooctyl)sulfonyl](3-sulfopropyl)amino]-N-(2-hydroxyethyl)-N,N-dimethyl-, inner salt	1-Propanaminium, 3-[[(heptadecafluorooctyl)sulfonyl](3-sulfopropyl)amino]-N-(2-hydroxyethyl)-N,N-dimethyl-, hydroxide, inner salt; 1-Propanaminium, 3-[[(heptadecafluorooctyl)sulfonyl](3-sulfopropyl)amino]-N-(2-hydroxyethyl)-N,N-dimethyl-, inner salt (9CI)	C18 H23 F17 N2 O6 S2	C[N+](C)(CC[O-])CCCN(CCCS(O)(=O)=O)S(=O)(=O)C(F)(F)C(F)(F)C(F)(F)C(F)(F)C(F)(F)C(F)(F)C(F)(F)C(F)(F)F		203	perfluoroalkane sulfonyl-based nonpolymers	0	8	1	1	0	0	NA	0		C[N+](C)(CC[O-])CCCN(CCCS(O)(=O)=O)S(=O)(=O)C(F)(F)C(F)(F)C(F)(F)C(F)(F)C(F)(F)C(F)(F)C(F)(F)C(F)(F)F	C[N+](C)(CC[O-])CCCNCCCS(O)(=O)=O	S(=O)(=O)C(F)(F)C(F)(F)C(F)(F)C(F)(F)C(F)(F)C(F)(F)C(F)(F)C(F)(F)F	1	S(=O)(=O)			#VALUE!	C[N+](C)(CC[O-])CCCN(CCCS(O)(=O)=O)S(=O)(=O)C(F)(F)C(F)(F)C(F)(F)C(F)(F)C(F)(F)C(F)(F)C(F)(F)C(F)(F)F	SNTCPXZDMUXYEP-UHFFFAOYSA-N	Organic compounds	Organohalogen compounds	Alkyl halides	Alkyl fluorides	Perfluorooctane sulfonic acid and derivatives	This compound belongs to the class of organic compounds known as perfluorooctane sulfonic acid and derivatives. These are organic compounds containing an octyl chain attached to the sulfur of a sulfonic acid (or a derivative thereof), where all hydrogens of the octyl chain are replaced by fluorine atoms.	Aliphatic acyclic compounds	SMILES			#VALUE!	C[N+](C)(CC[O-])CCCN(CCCS(O)(=O)=O)S(=O)(=O)CCCCCCCC	JSMSFHXALXWSBV-UHFFFAOYSA-N	Organic compounds	Organic acids and derivatives	Organic sulfonic acids and derivatives	Organosulfonic acids and derivatives	Organosulfonamides	This compound belongs to the class of organic compounds known as organosulfonamides. These are compounds containing the sulfonamide functional group, an amide of sulfonic acid with the general structure R1S(=O)2N(R2)R3 (R1=alkyl, aryl; R2,R3=H, alkyl, aryl).	Aliphatic acyclic compounds	SMILES
2363	67939-92-8	1-Hexanesulfonamide, N,N'-[phosphinicobis(oxy-2,1-ethanediyl)]bis[N-ethyl-1,1,2,2,3,3,4,4,5,5,6,6,6-tridecafluoro-	N,N'-[Phosphinicobis(oxy-2,1-ethanediyl)]bis[N-ethyl-1,1,2,2,3,3,4,4,5,5,6,6,6-tridecafluoro-1-hexanesulfonamide]	C20 H19 F26 N2 O8 P S2	CCN(CCOP(O)(=O)OCCN(CC)S(=O)(=O)C(F)(F)C(F)(F)C(F)(F)C(F)(F)C(F)(F)C(F)(F)F)S(=O)(=O)C(F)(F)C(F)(F)C(F)(F)C(F)(F)C(F)(F)C(F)(F)F		203.02	perfluoroalkane sulfonyl amido ethanols, phosphate esters (SAmPAPs)	1	6	1	1	0	0	NA	0		CCN(CCOP(O)(=O)OCCN(CC)S(=O)(=O)C(F)(F)C(F)(F)C(F)(F)C(F)(F)C(F)(F)C(F)(F)F)S(=O)(=O)C(F)(F)C(F)(F)C(F)(F)C(F)(F)C(F)(F)C(F)(F)F	CCNCCOP(O)(=O)OCCNCC	S(=O)(=O)C(F)(F)C(F)(F)C(F)(F)C(F)(F)C(F)(F)C(F)(F)F	2	S(=O)(=O)		5.3	67939-92-8	CCN(CCOP(O)(=O)OCCN(CC)S(=O)(=O)C(F)(F)C(F)(F)C(F)(F)C(F)(F)C(F)(F)C(F)(F)F)S(=O)(=O)C(F)(F)C(F)(F)C(F)(F)C(F)(F)C(F)(F)C(F)(F)F	UKMBKFIROBWXCF-UHFFFAOYSA-N	Organic compounds	Organic acids and derivatives	Organic phosphoric acids and derivatives	Phosphate esters	Phosphoethanolamines	This compound belongs to the class of organic compounds known as phosphoethanolamines. These are compounds containing a phosphate linked to the second carbon of an ethanolamine.	Aliphatic acyclic compounds	SMILES			67939-92-8	CCN(CCOP(O)(=O)OCCN(CC)S(=O)(=O)CCCCCC)S(=O)(=O)CCCCCC	SVLBNIVHSNUXJJ-UHFFFAOYSA-N	Organic compounds	Organic acids and derivatives	Organic phosphoric acids and derivatives	Phosphate esters	Phosphoethanolamines	This compound belongs to the class of organic compounds known as phosphoethanolamines. These are compounds containing a phosphate linked to the second carbon of an ethanolamine.	Aliphatic acyclic compounds	SMILES
2366	2965-52-8	1-Octanesulfonamide, N,N'-[phosphinicobis(oxy-2,1-ethanediyl)]bis[N-ethyl-1,1,2,2,3,3,4,4,5,5,6,6,7,7,8,8,8-heptadecafluoro-	1-Octanesulfonamide, N-ethyl-1,1,2,2,3,3,4,4,5,5,6,6,7,7,8,8,8-heptadecafluoro-N-(2-hydroxyethyl)-, phosphate (ester) (2:1) (8CI); N,N'-[Phosphinicobis(oxy-2,1-ethanediyl)]bis[N-ethyl-1,1,2,2,3,3,4,4,5,5,6,6,7,7,8,8,8-heptadecafluoro-1-octanesulfonamide]; N-Ethyl-N-(2-hydroxyethyl)perfluorooctanesulfonamide phosphate diester	C24 H19 F34 N2 O8 P S2	CCN(CCOP(O)(=O)OCCN(CC)S(=O)(=O)C(F)(F)C(F)(F)C(F)(F)C(F)(F)C(F)(F)C(F)(F)C(F)(F)C(F)(F)F)S(=O)(=O)C(F)(F)C(F)(F)C(F)(F)C(F)(F)C(F)(F)C(F)(F)C(F)(F)C(F)(F)F	389604-00-6	203.02	perfluoroalkane sulfonyl amido ethanols, phosphate esters (SAmPAPs)	1	8	1	1	0	0	NA	0		CCN(CCOP(O)(=O)OCCN(CC)S(=O)(=O)C(F)(F)C(F)(F)C(F)(F)C(F)(F)C(F)(F)C(F)(F)C(F)(F)C(F)(F)F)S(=O)(=O)C(F)(F)C(F)(F)C(F)(F)C(F)(F)C(F)(F)C(F)(F)C(F)(F)C(F)(F)F	CCNCCOP(O)(=O)OCCNCC	S(=O)(=O)C(F)(F)C(F)(F)C(F)(F)C(F)(F)C(F)(F)C(F)(F)C(F)(F)C(F)(F)F	2	S(=O)(=O)		5.3	2965-52-8	CCN(CCOP(O)(=O)OCCN(CC)S(=O)(=O)C(F)(F)C(F)(F)C(F)(F)C(F)(F)C(F)(F)C(F)(F)C(F)(F)C(F)(F)F)S(=O)(=O)C(F)(F)C(F)(F)C(F)(F)C(F)(F)C(F)(F)C(F)(F)C(F)(F)C(F)(F)F	BZZAKKWGRKFWJJ-UHFFFAOYSA-N	Organic compounds	Organohalogen compounds	Alkyl halides	Alkyl fluorides	Perfluorooctane sulfonic acid and derivatives	This compound belongs to the class of organic compounds known as perfluorooctane sulfonic acid and derivatives. These are organic compounds containing an octyl chain attached to the sulfur of a sulfonic acid (or a derivative thereof), where all hydrogens of the octyl chain are replaced by fluorine atoms.	Aliphatic acyclic compounds	SMILES			2965-52-8	CCN(CCOP(O)(=O)OCCN(CC)S(=O)(=O)CCCCCCCC)S(=O)(=O)CCCCCCCC	JZODYVALPKNSLW-UHFFFAOYSA-N	Organic compounds	Organic acids and derivatives	Organic phosphoric acids and derivatives	Phosphate esters	Phosphoethanolamines	This compound belongs to the class of organic compounds known as phosphoethanolamines. These are compounds containing a phosphate linked to the second carbon of an ethanolamine.	Aliphatic acyclic compounds	SMILES
2417	21055-88-9	Carbamic acid, N,N'-(4-methyl-1,3-phenylene)bis-, C,C'-bis[2-[ethyl[(1,1,2,2,3,3,4,4,5,5,6,6,7,7,8,8,8-heptadecafluorooctyl)sulfonyl]amino]ethyl] ester	Carbamic acid, (4-methyl-1,3-phenylene)bis-, bis[2-[ethyl[(heptadecafluorooctyl)sulfonyl]amino]ethyl] ester (9CI); Toluene-2,4-dicarbamic acid, diester with N-ethyl-1,1,2,2,3,3,4,4,5,5,6,6,7,7,8,8,8-heptadecafluoro-N-(2-hydroxyethyl)-1-octanesulfonamide (8CI); 1-Octanesulfonamide, N-ethyl-1,1,2,2,3,3,4,4,5,5,6,6,7,7,8,8,8-heptadecafluoro-N-(2-hydroxyethyl)-, toluene-2,4-dicarbamate (2:1) (ester) …	C33 H26 F34 N4 O8 S2	CCN(CCOC(=O)NC1=CC(NC(=O)OCCN(CC)S(=O)(=O)C(F)(F)C(F)(F)C(F)(F)C(F)(F)C(F)(F)C(F)(F)C(F)(F)C(F)(F)F)=C(C)C=C1)S(=O)(=O)C(F)(F)C(F)(F)C(F)(F)C(F)(F)C(F)(F)C(F)(F)C(F)(F)C(F)(F)F		203	perfluoroalkane sulfonyl-based nonpolymers	1	8	1	1	0	0	NA	0		CCN(CCOC(=O)NC1=CC(NC(=O)OCCN(CC)S(=O)(=O)C(F)(F)C(F)(F)C(F)(F)C(F)(F)C(F)(F)C(F)(F)C(F)(F)C(F)(F)F)=C(C)C=C1)S(=O)(=O)C(F)(F)C(F)(F)C(F)(F)C(F)(F)C(F)(F)C(F)(F)C(F)(F)C(F)(F)F	CCNCCOC(=O)NC1=CC(NC(=O)OCCNCC)=C(C)C=C1	S(=O)(=O)C(F)(F)C(F)(F)C(F)(F)C(F)(F)C(F)(F)C(F)(F)C(F)(F)C(F)(F)F	2	S(=O)(=O)		5.3	21055-88-9	CCN(CCOC(=O)NC1=CC(NC(=O)OCCN(CC)S(=O)(=O)C(F)(F)C(F)(F)C(F)(F)C(F)(F)C(F)(F)C(F)(F)C(F)(F)C(F)(F)F)=C(C)C=C1)S(=O)(=O)C(F)(F)C(F)(F)C(F)(F)C(F)(F)C(F)(F)C(F)(F)C(F)(F)C(F)(F)F	UTFFCBMSUHQFKN-UHFFFAOYSA-N	Organic compounds	Organohalogen compounds	Alkyl halides	Alkyl fluorides	Perfluorooctane sulfonic acid and derivatives	This compound belongs to the class of organic compounds known as perfluorooctane sulfonic acid and derivatives. These are organic compounds containing an octyl chain attached to the sulfur of a sulfonic acid (or a derivative thereof), where all hydrogens of the octyl chain are replaced by fluorine atoms.	Aromatic homomonocyclic compounds	SMILES			21055-88-9	CCN(CCOC(=O)NC1=CC(NC(=O)OCCN(CC)S(=O)(=O)CCCCCCCC)=C(C)C=C1)S(=O)(=O)CCCCCCCC	RQXRIKPIEQCDBG-UHFFFAOYSA-N	Organic compounds	Benzenoids	Benzene and substituted derivatives	Phenylcarbamic acid esters	Phenylcarbamic acid esters	This compound belongs to the class of organic compounds known as phenylcarbamic acid esters. These are ester derivatives of phenylcarbamic acids.	Aromatic homomonocyclic compounds	SMILES
2537	#VALUE!	1-Propanesulfonic acid, 1,1,2,3,3,3-hexafluoro-2-(trifluoromethyl)-	1,1,2,3,3,3-Hexafluoro-2-(trifluoromethyl)-1-propanesulfonic acid	C4 H F9 O3 S	OS(=O)(=O)C(F)(F)C(F)(C(F)(F)F)C(F)(F)F		202	perfluoroalkane sulfonic acids (PFSAs), their salts and esters	1	4	0	0	0	0	NA	0		OS(=O)(=O)C(F)(F)C(F)(C(F)(F)F)C(F)(F)F	O	S(=O)(=O)C(F)(F)C(F)(C(F)(F)F)C(F)(F)F	1	S(=O)(=O)			#VALUE!	OS(=O)(=O)C(F)(F)C(F)(C(F)(F)F)C(F)(F)F	GWJVUODILLGCGD-UHFFFAOYSA-N	Organic compounds	Organic acids and derivatives	Organic sulfonic acids and derivatives	Organosulfonic acids and derivatives	Organosulfonic acids	This compound belongs to the class of organic compounds known as organosulfonic acids. These are compounds containing the sulfonic acid group, which has the general structure RS(=O)2OH (R is not a hydrogen atom).	Aliphatic acyclic compounds	SMILES			#VALUE!	OS(=O)(=O)CC(C)C	FKOZPUORKCHONH-UHFFFAOYSA-N	Organic compounds	Organic acids and derivatives	Organic sulfonic acids and derivatives	Organosulfonic acids and derivatives	Organosulfonic acids	This compound belongs to the class of organic compounds known as organosulfonic acids. These are compounds containing the sulfonic acid group, which has the general structure RS(=O)2OH (R is not a hydrogen atom).	Aliphatic acyclic compounds	SMILES
2624	93894-52-1	1-Propanesulfonic acid, 1,1,2,3,3,3-hexafluoro-2-(trifluoromethyl)-, anhydride with 2-(difluorosulfonylmethyl)-1,1,1,2,3,3,3-heptafluoropropane	1-Propanesulfonic acid, 1,1,2,3,3,3-hexafluoro-2-(trifluoromethyl)-, anhydride (9CI)	C8 F18 O5 S2	FC(F)(F)C(F)(C(F)(F)F)C(F)(F)S(=O)(=O)OS(=O)(=O)C(F)(F)C(F)(C(F)(F)F)C(F)(F)F		202	perfluoroalkane sulfonic acids (PFSAs), their salts and esters	1	4	0	1	0	0	NA	0		FC(F)(F)C(F)(C(F)(F)F)C(F)(F)S(=O)(=O)OS(=O)(=O)C(F)(F)C(F)(C(F)(F)F)C(F)(F)F	O	FC(F)(F)C(F)(C(F)(F)F)C(F)(F)S(=O)=O	2	S(=O)(=O)		5.3	93894-52-1	FC(F)(F)C(F)(C(F)(F)F)C(F)(F)S(=O)(=O)OS(=O)(=O)C(F)(F)C(F)(C(F)(F)F)C(F)(F)F	DMRUAQMVQHUQQD-UHFFFAOYSA-N	Organic compounds	Organic acids and derivatives	Organic sulfonic acids and derivatives	Organosulfonic acids and derivatives	Organosulfonic anhydrides	This compound belongs to the class of organic compounds known as organosulfonic anhydrides. These are organic compounds having the structure RS(=O)2OS(=O)2R', where R = organyl group and R' = H or organyl group.	Aliphatic acyclic compounds	SMILES			93894-52-1	CC(C)CS(=O)(=O)OS(=O)(=O)CC(C)C	IPDLABYLUVQKTQ-UHFFFAOYSA-N	Organic compounds	Organic acids and derivatives	Organic sulfonic acids and derivatives	Organosulfonic acids and derivatives	Organosulfonic anhydrides	This compound belongs to the class of organic compounds known as organosulfonic anhydrides. These are organic compounds having the structure RS(=O)2OS(=O)2R', where R = organyl group and R' = H or organyl group.	Aliphatic acyclic compounds	SMILES
2982	30295-51-3	1-Octanesulfonamide, N-[3-(dimethyloxidoamino)propyl]-1,1,2,2,3,3,4,4,5,5,6,6,7,7,8,8,8-heptadecafluoro-	1-Octanesulfonamide, N-[3-(dimethylamino)propyl]-1,1,2,2,3,3,4,4,5,5,6,6,7,7,8,8,8-heptadecafluoro-, monooxide (8CI); N-[3-(Dimethyloxidoamino)propyl]-1,1,2,2,3,3,4,4,5,5,6,6,7,7,8,8,8-heptadecafluoro-1-octanesulfonamide	C13 H13 F17 N2 O3 S	CCN([O-])CCCNS(=O)(=O)C(F)(F)C(F)(F)C(F)(F)C(F)(F)C(F)(F)C(F)(F)C(F)(F)C(F)(F)F		203	perfluoroalkane sulfonyl-based nonpolymers	1	8	1	1	0	0	NA	0		CCN([O-])CCCNS(=O)(=O)C(F)(F)C(F)(F)C(F)(F)C(F)(F)C(F)(F)C(F)(F)C(F)(F)C(F)(F)F	CCN([O-])CCCN	S(=O)(=O)C(F)(F)C(F)(F)C(F)(F)C(F)(F)C(F)(F)C(F)(F)C(F)(F)C(F)(F)F	1	S(=O)(=O)			30295-51-3	CCN([O-])CCCNS(=O)(=O)C(F)(F)C(F)(F)C(F)(F)C(F)(F)C(F)(F)C(F)(F)C(F)(F)C(F)(F)F	BLEPWNQXFFYAEL-UHFFFAOYSA-N	Organic compounds	Organohalogen compounds	Alkyl halides	Alkyl fluorides	Perfluorooctane sulfonic acid and derivatives	This compound belongs to the class of organic compounds known as perfluorooctane sulfonic acid and derivatives. These are organic compounds containing an octyl chain attached to the sulfur of a sulfonic acid (or a derivative thereof), where all hydrogens of the octyl chain are replaced by fluorine atoms.	Aliphatic acyclic compounds	SMILES			30295-51-3	CCN([O-])CCCNS(=O)(=O)CCCCCCCC	RERQJXPJYMGXBT-UHFFFAOYSA-N	Organic compounds	Organic acids and derivatives	Organic sulfonic acids and derivatives	Organosulfonic acids and derivatives	Organosulfonamides	This compound belongs to the class of organic compounds known as organosulfonamides. These are compounds containing the sulfonamide functional group, an amide of sulfonic acid with the general structure R1S(=O)2N(R2)R3 (R1=alkyl, aryl; R2,R3=H, alkyl, aryl).	Aliphatic acyclic compounds	SMILES
2986	52550-45-5	Poly(oxy-1,2-ethanediyl), α-[2-[[(1,1,2,2,3,3,4,4,5,5,6,6,7,7,8,8,8-heptadecafluorooctyl)sulfonyl]propylamino]ethyl]-ω-hydroxy-	Poly(oxy-1,2-ethanediyl), α-[2-[[(heptadecafluorooctyl)sulfonyl]propylamino]ethyl]-ω-hydroxy- (9CI); EF 122A; EF 122B; Eftop EF 122B; F 142D; F 144D; Megafac F 142D; Megafac F 144D; N-Propylperfluorooctane sulfonamidoethanol polyoxyethylene; Polyethylene glycol N-perfluorooctylsulfonyl-N-propylaminoethanol ether	(C2 H4 O)n C13 H12 F17 N O3 S	CCCN(CCOCCO)S(=O)(=O)C(F)(F)C(F)(F)C(F)(F)C(F)(F)C(F)(F)C(F)(F)C(F)(F)C(F)(F)F	73730-12-8, 81209-76-9, 93195-97-2, 146245-95-6, 154193-16-5, 392273-85-7, 951320-99-3	204	perfluoroalkane sulfonyl-based side-chain fluorinated polymers	1	8	1	1	1	1	NA	0	ethoxylated	CCCN(CCOCCO)S(=O)(=O)C(F)(F)C(F)(F)C(F)(F)C(F)(F)C(F)(F)C(F)(F)C(F)(F)C(F)(F)F	CCCNCCOCCO	S(=O)(=O)C(F)(F)C(F)(F)C(F)(F)C(F)(F)C(F)(F)C(F)(F)C(F)(F)C(F)(F)F	1	S(=O)(=O)			52550-45-5	CCCN(CCOCCO)S(=O)(=O)C(F)(F)C(F)(F)C(F)(F)C(F)(F)C(F)(F)C(F)(F)C(F)(F)C(F)(F)F	DTIJQLFRKLLKHX-UHFFFAOYSA-N	Organic compounds	Organohalogen compounds	Alkyl halides	Alkyl fluorides	Perfluorooctane sulfonic acid and derivatives	This compound belongs to the class of organic compounds known as perfluorooctane sulfonic acid and derivatives. These are organic compounds containing an octyl chain attached to the sulfur of a sulfonic acid (or a derivative thereof), where all hydrogens of the octyl chain are replaced by fluorine atoms.	Aliphatic acyclic compounds	SMILES			52550-45-5	CCCN(CCOCCO)S(=O)(=O)CCCCCCCC	AIYXTAIOWPYUOJ-UHFFFAOYSA-N	Organic compounds	Organic acids and derivatives	Organic sulfonic acids and derivatives	Organosulfonic acids and derivatives	Organosulfonamides	This compound belongs to the class of organic compounds known as organosulfonamides. These are compounds containing the sulfonamide functional group, an amide of sulfonic acid with the general structure R1S(=O)2N(R2)R3 (R1=alkyl, aryl; R2,R3=H, alkyl, aryl).	Aliphatic acyclic compounds	SMILES
2996	68318-36-5	1-Propanaminium, 3-[(carboxymethyl)[(1,1,2,2,3,3,4,4,5,5,6,6,7,7,8,8,8-heptadecafluorooctyl)sulfonyl]amino]-N,N,N-trimethyl-, inner salt	1-Propanaminium, 3-[(carboxymethyl)[(heptadecafluorooctyl)sulfonyl]amino]-N,N,N-trimethyl-, hydroxide, inner salt; 1-Propanaminium, 3-[(carboxymethyl)[(heptadecafluorooctyl)sulfonyl]amino]-N,N,N-trimethyl-, inner salt (9CI)	C16 H17 F17 N2 O4 S	C[N+](C)(C)CCCN(CC([O-])=O)S(=O)(=O)C(F)(F)C(F)(F)C(F)(F)C(F)(F)C(F)(F)C(F)(F)C(F)(F)C(F)(F)F		203	perfluoroalkane sulfonyl-based nonpolymers	0	8	1	1	0	0	NA	0		C[N+](C)(C)CCCN(CC([O-])=O)S(=O)(=O)C(F)(F)C(F)(F)C(F)(F)C(F)(F)C(F)(F)C(F)(F)C(F)(F)C(F)(F)F	C[N+](C)(C)CCCNCC([O-])=O	S(=O)(=O)C(F)(F)C(F)(F)C(F)(F)C(F)(F)C(F)(F)C(F)(F)C(F)(F)C(F)(F)F	1	S(=O)(=O)			68318-36-5	C[N+](C)(C)CCCN(CC([O-])=O)S(=O)(=O)C(F)(F)C(F)(F)C(F)(F)C(F)(F)C(F)(F)C(F)(F)C(F)(F)C(F)(F)F	HBCIQEOSBTUVDJ-UHFFFAOYSA-N	Organic compounds	Organohalogen compounds	Alkyl halides	Alkyl fluorides	Perfluorooctane sulfonic acid and derivatives	This compound belongs to the class of organic compounds known as perfluorooctane sulfonic acid and derivatives. These are organic compounds containing an octyl chain attached to the sulfur of a sulfonic acid (or a derivative thereof), where all hydrogens of the octyl chain are replaced by fluorine atoms.	Aliphatic acyclic compounds	SMILES			68318-36-5	C[N+](C)(C)CCCN(CC([O-])=O)S(=O)(=O)CCCCCCCC	RKWJSMLTXYLXBS-UHFFFAOYSA-N	Organic compounds	Organic acids and derivatives	Carboxylic acids and derivatives	Amino acids, peptides, and analogues	Alpha amino acids and derivatives	This compound belongs to the class of organic compounds known as alpha amino acids and derivatives. These are amino acids in which the amino group is attached to the carbon atom immediately adjacent to the carboxylate group (alpha carbon), or a derivative thereof.	Aliphatic acyclic compounds	SMILES
3011	68891-96-3	Chromium, diaquatetrachloro[μ-[N-ethyl-N-[(1,1,2,2,3,3,4,4,5,5,6,6,7,7,8,8,8-heptadecafluorooctyl)sulfonyl]glycinato-κO:κO']]-μ-hydroxybis(2-methyl-1-propanol)di-	Chromium, diaquatetrachloro[μ-[N-ethyl-N-[(heptadecafluorooctyl)sulfonyl]glycinato-O1:O1']]-μ-hydroxybis(2-methyl-1-propanol)di-; Chromium, diaquatetrachloro[μ-[N-ethyl-N-[(heptadecafluorooctyl)sulfonyl]glycinato-κO:κO']]-μ-hydroxybis(2-methyl-1-propanol)di- (9CI); Diaquatetrachloro[μ-[N-ethyl-N-[(1,1,2,2,3,3,4,4,5,5,6,6,7,7,8,8,8-heptadecafluorooctyl)sulfonyl]glycinato-κO:κO']]-μ-hydroxybis(2-me…	C20 H32 Cl4 Cr2 F17 N O9 S	O.O.[OH-].[Cl-].[Cl-].[Cl-].[Cl-].[Cr+3].[Cr+3].CC(C)CO.CC(C)CO.CCN(CC([O-])=O)S(=O)(=O)C(F)(F)C(F)(F)C(F)(F)C(F)(F)C(F)(F)C(F)(F)C(F)(F)C(F)(F)F		203	perfluoroalkane sulfonyl-based nonpolymers	0	8	1	1	0	0	NA	0		O.O.[OH-].[Cl-].[Cl-].[Cl-].[Cl-].[Cr+3].[Cr+3].CC(C)CO.CC(C)CO.CCN(CC([O-])=O)S(=O)(=O)C(F)(F)C(F)(F)C(F)(F)C(F)(F)C(F)(F)C(F)(F)C(F)(F)C(F)(F)F	CCNCC([O-])=O	S(=O)(=O)C(F)(F)C(F)(F)C(F)(F)C(F)(F)C(F)(F)C(F)(F)C(F)(F)C(F)(F)F	1	S(=O)(=O)			68891-96-3	O.O.[OH-].[Cl-].[Cl-].[Cl-].[Cl-].[Cr+3].[Cr+3].CC(C)CO.CC(C)CO.CCN(CC([O-])=O)S(=O)(=O)C(F)(F)C(F)(F)C(F)(F)C(F)(F)C(F)(F)C(F)(F)C(F)(F)C(F)(F)F	RAEFMHKBYRJGSN-UHFFFAOYSA-H	Organic compounds	Organohalogen compounds	Alkyl halides	Alkyl fluorides	Perfluorooctane sulfonic acid and derivatives	This compound belongs to the class of organic compounds known as perfluorooctane sulfonic acid and derivatives. These are organic compounds containing an octyl chain attached to the sulfur of a sulfonic acid (or a derivative thereof), where all hydrogens of the octyl chain are replaced by fluorine atoms.		SMILES			68891-96-3	O.O.[OH-].[Cl-].[Cl-].[Cl-].[Cl-].[Cr+3].[Cr+3].CC(C)CO.CC(C)CO.CCN(CC([O-])=O)S(=O)(=O)CCCCCCCC	SSFDCQIEZJNIRA-UHFFFAOYSA-H	Organic compounds	Organic acids and derivatives	Carboxylic acids and derivatives	Amino acids, peptides, and analogues	Alpha amino acids and derivatives	This compound belongs to the class of organic compounds known as alpha amino acids and derivatives. These are amino acids in which the amino group is attached to the carbon atom immediately adjacent to the carboxylate group (alpha carbon), or a derivative thereof.		SMILES
3017	#VALUE!	1-Propanesulfonic acid, 3-[[3-(dimethylamino)propyl][(1,1,2,2,3,3,4,4,5,5,6,6,7,7,8,8,8-heptadecafluorooctyl)sulfonyl]amino]-	1-Propanesulfonic acid, 3-[[3-(dimethylamino)propyl][(heptadecafluorooctyl)sulfonyl]amino]- (9CI); 3-[[3-(Dimethylamino)propyl][(1,1,2,2,3,3,4,4,5,5,6,6,7,7,8,8,8-heptadecafluorooctyl)sulfonyl]amino]-1-propanesulfonic acid	C16 H19 F17 N2 O5 S2	CN(C)CCCN(CCCS(O)(=O)=O)S(=O)(=O)C(F)(F)C(F)(F)C(F)(F)C(F)(F)C(F)(F)C(F)(F)C(F)(F)C(F)(F)F		203	perfluoroalkane sulfonyl-based nonpolymers	0	8	1	1	0	0	NA	0		CN(C)CCCN(CCCS(O)(=O)=O)S(=O)(=O)C(F)(F)C(F)(F)C(F)(F)C(F)(F)C(F)(F)C(F)(F)C(F)(F)C(F)(F)F	CN(C)CCCNCCCS(O)(=O)=O	S(=O)(=O)C(F)(F)C(F)(F)C(F)(F)C(F)(F)C(F)(F)C(F)(F)C(F)(F)C(F)(F)F	1	S(=O)(=O)			#VALUE!	CN(C)CCCN(CCCS(O)(=O)=O)S(=O)(=O)C(F)(F)C(F)(F)C(F)(F)C(F)(F)C(F)(F)C(F)(F)C(F)(F)C(F)(F)F	UUBYZMXGONPVTR-UHFFFAOYSA-N	Organic compounds	Organohalogen compounds	Alkyl halides	Alkyl fluorides	Perfluorooctane sulfonic acid and derivatives	This compound belongs to the class of organic compounds known as perfluorooctane sulfonic acid and derivatives. These are organic compounds containing an octyl chain attached to the sulfur of a sulfonic acid (or a derivative thereof), where all hydrogens of the octyl chain are replaced by fluorine atoms.	Aliphatic acyclic compounds	SMILES			#VALUE!	CN(C)CCCN(CCCS(O)(=O)=O)S(=O)(=O)CCCCCCCC	NYXAUFCLAQDCST-UHFFFAOYSA-N	Organic compounds	Organic acids and derivatives	Organic sulfonic acids and derivatives	Organosulfonic acids and derivatives	Organosulfonamides	This compound belongs to the class of organic compounds known as organosulfonamides. These are compounds containing the sulfonamide functional group, an amide of sulfonic acid with the general structure R1S(=O)2N(R2)R3 (R1=alkyl, aryl; R2,R3=H, alkyl, aryl).	Aliphatic acyclic compounds	SMILES
3019	73019-19-9	Benzamide, 4-[[4-[[[2-[[(1,1,2,2,3,3,4,4,5,5,6,6,7,7,8,8,8-heptadecafluorooctyl)sulfonyl]propylamino]ethyl]amino]carbonyl]phenyl]methyl]-N-octadecyl-	Benzamide, 4-[[4-[[[2-[[(heptadecafluorooctyl)sulfonyl]propylamino]ethyl]amino]carbonyl]phenyl]methyl]-N-octadecyl- (9CI); 4-[[4-[[[2-[[(1,1,2,2,3,3,4,4,5,5,6,6,7,7,8,8,8-Heptadecafluorooctyl)sulfonyl]propylamino]ethyl]amino]carbonyl]phenyl]methyl]-N-octadecylbenzamide	C46 H60 F17 N3 O4 S	CCCCCCCCCCCCCCCCCCNC(=O)C1=CC=C(CC2=CC=C(C=C2)C(=O)NCCN(CCC)S(=O)(=O)C(F)(F)C(F)(F)C(F)(F)C(F)(F)C(F)(F)C(F)(F)C(F)(F)C(F)(F)F)C=C1		203	perfluoroalkane sulfonyl-based nonpolymers	1	8	1	1	0	0	NA	0		CCCCCCCCCCCCCCCCCCNC(=O)C1=CC=C(CC2=CC=C(C=C2)C(=O)NCCN(CCC)S(=O)(=O)C(F)(F)C(F)(F)C(F)(F)C(F)(F)C(F)(F)C(F)(F)C(F)(F)C(F)(F)F)C=C1	CCCCCCCCCCCCCCCCCCNC(=O)C1=CC=C(CC2=CC=C(C=C2)C(=O)NCCNCCC)C=C1	S(=O)(=O)C(F)(F)C(F)(F)C(F)(F)C(F)(F)C(F)(F)C(F)(F)C(F)(F)C(F)(F)F	1	S(=O)(=O)			73019-19-9	CCCCCCCCCCCCCCCCCCNC(=O)C1=CC=C(CC2=CC=C(C=C2)C(=O)NCCN(CCC)S(=O)(=O)C(F)(F)C(F)(F)C(F)(F)C(F)(F)C(F)(F)C(F)(F)C(F)(F)C(F)(F)F)C=C1	VSMLCKGSLXSQHO-UHFFFAOYSA-N	Organic compounds	Organohalogen compounds	Alkyl halides	Alkyl fluorides	Perfluorooctane sulfonic acid and derivatives	This compound belongs to the class of organic compounds known as perfluorooctane sulfonic acid and derivatives. These are organic compounds containing an octyl chain attached to the sulfur of a sulfonic acid (or a derivative thereof), where all hydrogens of the octyl chain are replaced by fluorine atoms.	Aromatic homomonocyclic compounds	SMILES			73019-19-9	CCCCCCCCCCCCCCCCCCNC(=O)C1=CC=C(CC2=CC=C(C=C2)C(=O)NCCN(CCC)S(=O)(=O)CCCCCCCC)C=C1	CDUINOHWVYBZKA-UHFFFAOYSA-N	Organic compounds	Benzenoids	Benzene and substituted derivatives	Diphenylmethanes	Diphenylmethanes	This compound belongs to the class of organic compounds known as diphenylmethanes. These are compounds containing a diphenylmethane moiety, which consists of a methane wherein two hydrogen atoms are replaced by two phenyl groups.	Aromatic homomonocyclic compounds	SMILES
3020	73019-20-2	1,3-Benzenedicarboxamide, N3-[2-[[(1,1,2,2,3,3,4,4,5,5,6,6,7,7,8,8,8-heptadecafluorooctyl)sulfonyl]methylamino]ethyl]-N1-[2-[[(1,1,2,2,3,3,4,4,5,5,6,6,7,7,8,8,8-heptadecafluorooctyl)sulfonyl]propylamino]ethyl]-4-methyl-	1,3-Benzenedicarboxamide, N3-[2-[[(heptadecafluorooctyl)sulfonyl]methylamino]ethyl]-N1-[2-[[(heptadecafluorooctyl)sulfonyl]propylamino]ethyl]-4-methyl- (9CI); N3-[2-[[(1,1,2,2,3,3,4,4,5,5,6,6,7,7,8,8,8-Heptadecafluorooctyl)sulfonyl]methylamino]ethyl]-N1-[2-[[(1,1,2,2,3,3,4,4,5,5,6,6,7,7,8,8,8-heptadecafluorooctyl)sulfonyl]propylamino]ethyl]-4-methyl-1,3-benzenedicarboxamide	C33 H26 F34 N4 O6 S2	CCCN(CCNC(=O)C1=CC=C(C)C(=C1)C(=O)NCCN(C)S(=O)(=O)C(F)(F)C(F)(F)C(F)(F)C(F)(F)C(F)(F)C(F)(F)C(F)(F)C(F)(F)F)S(=O)(=O)C(F)(F)C(F)(F)C(F)(F)C(F)(F)C(F)(F)C(F)(F)C(F)(F)C(F)(F)F		203	perfluoroalkane sulfonyl-based nonpolymers	1	8	1	1	0	0	NA	0		CCCN(CCNC(=O)C1=CC=C(C)C(=C1)C(=O)NCCN(C)S(=O)(=O)C(F)(F)C(F)(F)C(F)(F)C(F)(F)C(F)(F)C(F)(F)C(F)(F)C(F)(F)F)S(=O)(=O)C(F)(F)C(F)(F)C(F)(F)C(F)(F)C(F)(F)C(F)(F)C(F)(F)C(F)(F)F	CCCNCCNC(=O)C1=CC=C(C)C(=C1)C(=O)NCCNC	S(=O)(=O)C(F)(F)C(F)(F)C(F)(F)C(F)(F)C(F)(F)C(F)(F)C(F)(F)C(F)(F)F	2	S(=O)(=O)		5.3	73019-20-2	CCCN(CCNC(=O)C1=CC=C(C)C(=C1)C(=O)NCCN(C)S(=O)(=O)C(F)(F)C(F)(F)C(F)(F)C(F)(F)C(F)(F)C(F)(F)C(F)(F)C(F)(F)F)S(=O)(=O)C(F)(F)C(F)(F)C(F)(F)C(F)(F)C(F)(F)C(F)(F)C(F)(F)C(F)(F)F	TZGYROAPHGJQIG-UHFFFAOYSA-N	Organic compounds	Organohalogen compounds	Alkyl halides	Alkyl fluorides	Perfluorooctane sulfonic acid and derivatives	This compound belongs to the class of organic compounds known as perfluorooctane sulfonic acid and derivatives. These are organic compounds containing an octyl chain attached to the sulfur of a sulfonic acid (or a derivative thereof), where all hydrogens of the octyl chain are replaced by fluorine atoms.	Aromatic homomonocyclic compounds	SMILES			73019-20-2	CCCN(CCNC(=O)C1=CC=C(C)C(=C1)C(=O)NCCN(C)S(=O)(=O)CCCCCCCC)S(=O)(=O)CCCCCCCC	PWVVWJGUMSUHHT-UHFFFAOYSA-N	Organic compounds	Benzenoids	Benzene and substituted derivatives	Benzoic acids and derivatives	Benzamides	This compound belongs to the class of organic compounds known as benzamides. These are organic compounds containing a carboxamido substituent attached to a benzene ring.	Aromatic homomonocyclic compounds	SMILES
3036	93894-71-4	Isooctanesulfonamide, heptadecafluoro-N-methyl- (9CI)		C9 H4 F17 N O2 S	CNS(=O)(=O)C(F)(F)C(F)(F)C(F)(F)C(F)(F)C(F)(F)C(F)(C(F)(F)F)C(F)(F)F		203.01	perfluoroalkane sulfonyl amides/amido ethanols (xFASA/Es) and other alcohols	1	8	0	1	0	0	NA	0		CNS(=O)(=O)C(F)(F)C(F)(F)C(F)(F)C(F)(F)C(F)(F)C(F)(C(F)(F)F)C(F)(F)F	CN	S(=O)(=O)C(F)(F)C(F)(F)C(F)(F)C(F)(F)C(F)(F)C(F)(C(F)(F)F)C(F)(F)F	1	S(=O)(=O)			93894-71-4	CNS(=O)(=O)C(F)(F)C(F)(F)C(F)(F)C(F)(F)C(F)(F)C(F)(C(F)(F)F)C(F)(F)F	ZGKQZNCLVBOAST-UHFFFAOYSA-N	Organic compounds	Organic acids and derivatives	Organic sulfonic acids and derivatives	Organosulfonic acids and derivatives	Organosulfonamides	This compound belongs to the class of organic compounds known as organosulfonamides. These are compounds containing the sulfonamide functional group, an amide of sulfonic acid with the general structure R1S(=O)2N(R2)R3 (R1=alkyl, aryl; R2,R3=H, alkyl, aryl).	Aliphatic acyclic compounds	SMILES			93894-71-4	CNS(=O)(=O)CCCCCC(C)C	YDMVUTRSWYXMJO-UHFFFAOYSA-N	Organic compounds	Organic acids and derivatives	Organic sulfonic acids and derivatives	Organosulfonic acids and derivatives	Organosulfonamides	This compound belongs to the class of organic compounds known as organosulfonamides. These are compounds containing the sulfonamide functional group, an amide of sulfonic acid with the general structure R1S(=O)2N(R2)R3 (R1=alkyl, aryl; R2,R3=H, alkyl, aryl).	Aliphatic acyclic compounds	SMILES
3038	94313-84-5	Carbamic acid, [5-[[[2-[[(heptadecafluorooctyl)sulfonyl]methylamino]ethoxy]carbonyl]amino]-2-methylphenyl]-, 9-octadecenyl ester, (Z)- (9CI)		C38 H50 F17 N3 O6 S	CCCCCCCC\C=C/CCCCCCCCOC(=O)NC1=CC(NC(=O)OCCN(C)S(=O)(=O)C(F)(F)C(F)(F)C(F)(F)C(F)(F)C(F)(F)C(F)(F)C(F)(F)C(F)(F)F)=CC=C1C		203	perfluoroalkane sulfonyl-based nonpolymers	1	8	1	1	0	0	NA	0		CCCCCCCC\C=C/CCCCCCCCOC(=O)NC1=CC(NC(=O)OCCN(C)S(=O)(=O)C(F)(F)C(F)(F)C(F)(F)C(F)(F)C(F)(F)C(F)(F)C(F)(F)C(F)(F)F)=CC=C1C	CCCCCCCCC=CCCCCCCCCOC(=O)NC1=CC(NC(=O)OCCNC)=CC=C1C	S(=O)(=O)C(F)(F)C(F)(F)C(F)(F)C(F)(F)C(F)(F)C(F)(F)C(F)(F)C(F)(F)F	1	S(=O)(=O)			94313-84-5	CCCCCCCC\C=C/CCCCCCCCOC(=O)NC1=CC(NC(=O)OCCN(C)S(=O)(=O)C(F)(F)C(F)(F)C(F)(F)C(F)(F)C(F)(F)C(F)(F)C(F)(F)C(F)(F)F)=CC=C1C	KNRYNMVWXXLSPN-QXMHVHEDSA-N	Organic compounds	Organohalogen compounds	Alkyl halides	Alkyl fluorides	Perfluorooctane sulfonic acid and derivatives	This compound belongs to the class of organic compounds known as perfluorooctane sulfonic acid and derivatives. These are organic compounds containing an octyl chain attached to the sulfur of a sulfonic acid (or a derivative thereof), where all hydrogens of the octyl chain are replaced by fluorine atoms.	Aromatic homomonocyclic compounds	SMILES			94313-84-5	CCCCCCCC\C=C/CCCCCCCCOC(=O)NC1=CC(NC(=O)OCCN(C)S(=O)(=O)CCCCCCCC)=CC=C1C	GBCPDKYGGDDWHF-MSUUIHNZSA-N	Organic compounds	Benzenoids	Benzene and substituted derivatives	Phenylcarbamic acid esters	Phenylcarbamic acid esters	This compound belongs to the class of organic compounds known as phenylcarbamic acid esters. These are ester derivatives of phenylcarbamic acids.	Aromatic homomonocyclic compounds	SMILES
3080	0355-03-03	Cyclohexanesulfonyl fluoride, 1,2,2,3,3,4,4,5,5,6,6-undecafluoro-	Cyclohexanesulfonyl fluoride, undecafluoro- (8CI,9CI); 1,2,2,3,3,4,4,5,5,6,6-Undecafluorocyclohexanesulfonyl fluoride	C6 F12 O2 S	FC1(F)C(F)(F)C(F)(F)C(F)(C(F)(F)C1(F)F)S(F)(=O)=O		201	perfluoroalkane sulfonyl halides	1	6(1R)	0	1	0	0	NA	0		FC1(F)C(F)(F)C(F)(F)C(F)(C(F)(F)C1(F)F)S(F)(=O)=O	NA	NA	NA	NA	No splittable bond found for the input molecule FC1(F)C(F)(F)C(F)(F)C(F)(C(F)(F)C1(F)F)S(F)(=O)=O	6	0355-03-03	FC1(F)C(F)(F)C(F)(F)C(F)(C(F)(F)C1(F)F)S(F)(=O)=O	SUYQQGZHVVTMNY-UHFFFAOYSA-N	Organic compounds	Organohalogen compounds	Alkyl halides	Cyclohexyl halides	Cyclohexyl halides	This compound belongs to the class of organic compounds known as cyclohexyl halides. These are organohalogen compounds containing a monocyclic cyclohexane moiety that is substituted at one or more positions by an halogen atom.	Aliphatic homomonocyclic compounds	SMILES			0355-03-03	C1CCC(CC1)S(=O)=O	BYSZOXCQAZAFAO-UHFFFAOYSA-N	Organic compounds	Organosulfur compounds	Thiols	Alkylthiols	Alkylthiols	This compound belongs to the class of organic compounds known as alkylthiols. These are organic compounds containing the thiol functional group linked to an alkyl chain.	Aliphatic homomonocyclic compounds	SMILES
3084	42060-64-0	Thiophene, 2,2,3,3,4,4,5,5-octafluorotetrahydro-, 1,1-dioxide	Thiophene, octafluorotetrahydro-, 1,1-dioxide (9CI); Perfluorosulfolane	C4 F8 O2 S	FC1(F)C(F)(F)C(F)(F)S(=O)(=O)C1(F)F		203	perfluoroalkane sulfonyl-based nonpolymers	0	4(1R)	0	1	0	0	NA	1	degradation uncertain	FC1(F)C(F)(F)C(F)(F)S(=O)(=O)C1(F)F	[SH2](=O)=O	FC(F)(C(F)(F)C(F)F)C(F)F	1			1	42060-64-0	FC1(F)C(F)(F)C(F)(F)S(=O)(=O)C1(F)F	CBDPDNLRQXGUIG-UHFFFAOYSA-N	Organic compounds	Organoheterocyclic compounds	Thiolanes		Thiolanes	This compound belongs to the class of organic compounds known as thiolanes. These are organic compounds containing thiolane, a five-member saturated ring containing four carbon atoms and a sulfur atom.	Aliphatic heteromonocyclic compounds	SMILES			42060-64-0	C1CCS(=O)(=O)C1	HXJUTPCZVOIRIF-UHFFFAOYSA-N	Organic compounds	Organoheterocyclic compounds	Thiolanes		Thiolanes	This compound belongs to the class of organic compounds known as thiolanes. These are organic compounds containing thiolane, a five-member saturated ring containing four carbon atoms and a sulfur atom.	Aliphatic heteromonocyclic compounds	SMILES
3085	53518-00-6	1-Propanaminium, N,N,N-trimethyl-3-[[(1,1,2,2,3,3,4,4,4-nonafluorobutyl)sulfonyl]amino]-, chloride (1:1)	1-Propanaminium, N,N,N-trimethyl-3-[[(nonafluorobutyl)sulfonyl]amino]-, chloride (9CI)	C10 H16 F9 N2 O2 S . Cl	[Cl-].[H]N(CCC[N+](C)(C)C)S(=O)(=O)C(F)(F)C(F)(F)C(F)(F)C(F)(F)F		203	perfluoroalkane sulfonyl-based nonpolymers	1	4	1	1	0	0	NA	0		[Cl-].[H]N(CCC[N+](C)(C)C)S(=O)(=O)C(F)(F)C(F)(F)C(F)(F)C(F)(F)F	NCCC[N+](C)(C)C	S(=O)(=O)C(F)(F)C(F)(F)C(F)(F)C(F)(F)F	1	S(=O)(=O)			53518-00-6	[Cl-].[H]N(CCC[N+](C)(C)C)S(=O)(=O)C(F)(F)C(F)(F)C(F)(F)C(F)(F)F	XPUBELOONPJHFF-UHFFFAOYSA-M	Organic compounds	Organic acids and derivatives	Organic sulfonic acids and derivatives	Organosulfonic acids and derivatives	Organosulfonamides	This compound belongs to the class of organic compounds known as organosulfonamides. These are compounds containing the sulfonamide functional group, an amide of sulfonic acid with the general structure R1S(=O)2N(R2)R3 (R1=alkyl, aryl; R2,R3=H, alkyl, aryl).	Aliphatic acyclic compounds	SMILES			53518-00-6	[Cl-].[H]N(CCC[N+](C)(C)C)S(=O)(=O)CCCC	DQRJZNBRLWOHJW-UHFFFAOYSA-M	Organic compounds	Organic acids and derivatives	Organic sulfonic acids and derivatives	Organosulfonic acids and derivatives	Organosulfonamides	This compound belongs to the class of organic compounds known as organosulfonamides. These are compounds containing the sulfonamide functional group, an amide of sulfonic acid with the general structure R1S(=O)2N(R2)R3 (R1=alkyl, aryl; R2,R3=H, alkyl, aryl).	Aliphatic acyclic compounds	SMILES
3087	67584-48-9	1-Hexanesulfonamide, 1,1,2,2,3,3,4,4,5,5,6,6,6-tridecafluoro-N-2-propen-1-yl-	1-Hexanesulfonamide, 1,1,2,2,3,3,4,4,5,5,6,6,6-tridecafluoro-N-2-propenyl- (9CI); 1,1,2,2,3,3,4,4,5,5,6,6,6-Tridecafluoro-N-2-propen-1-yl-1-hexanesulfonamide	C9 H6 F13 N O2 S	FC(F)(F)C(F)(F)C(F)(F)C(F)(F)C(F)(F)C(F)(F)S(=O)(=O)NCC=C		203.01	perfluoroalkane sulfonyl amides/amido ethanols (xFASA/Es) and other alcohols	1	6	1	1	0	0	NA	0		FC(F)(F)C(F)(F)C(F)(F)C(F)(F)C(F)(F)C(F)(F)S(=O)(=O)NCC=C	NCC=C	FC(F)(F)C(F)(F)C(F)(F)C(F)(F)C(F)(F)C(F)(F)S(=O)=O	1	S(=O)(=O)			67584-48-9	FC(F)(F)C(F)(F)C(F)(F)C(F)(F)C(F)(F)C(F)(F)S(=O)(=O)NCC=C	OEYYQKXFSDVKJI-UHFFFAOYSA-N	Organic compounds	Organic acids and derivatives	Organic sulfonic acids and derivatives	Organosulfonic acids and derivatives	Organosulfonamides	This compound belongs to the class of organic compounds known as organosulfonamides. These are compounds containing the sulfonamide functional group, an amide of sulfonic acid with the general structure R1S(=O)2N(R2)R3 (R1=alkyl, aryl; R2,R3=H, alkyl, aryl).	Aliphatic acyclic compounds	SMILES			67584-48-9	CCCCCCS(=O)(=O)NCC=C	BAPPWMWJCNNVFA-UHFFFAOYSA-N	Organic compounds	Organic acids and derivatives	Organic sulfonic acids and derivatives	Organosulfonic acids and derivatives	Organosulfonamides	This compound belongs to the class of organic compounds known as organosulfonamides. These are compounds containing the sulfonamide functional group, an amide of sulfonic acid with the general structure R1S(=O)2N(R2)R3 (R1=alkyl, aryl; R2,R3=H, alkyl, aryl).	Aliphatic acyclic compounds	SMILES
3088	67584-49-0	1-Heptanesulfonamide, 1,1,2,2,3,3,4,4,5,5,6,6,7,7,7-pentadecafluoro-N-2-propen-1-yl-	1-Heptanesulfonamide, 1,1,2,2,3,3,4,4,5,5,6,6,7,7,7-pentadecafluoro-N-2-propenyl- (9CI); 1,1,2,2,3,3,4,4,5,5,6,6,7,7,7-Pentadecafluoro-N-2-propen-1-yl-1-heptanesulfonamide	C10 H6 F15 N O2 S	FC(F)(F)C(F)(F)C(F)(F)C(F)(F)C(F)(F)C(F)(F)C(F)(F)S(=O)(=O)NCC=C		203.01	perfluoroalkane sulfonyl amides/amido ethanols (xFASA/Es) and other alcohols	1	7	1	1	0	0	NA	0		FC(F)(F)C(F)(F)C(F)(F)C(F)(F)C(F)(F)C(F)(F)C(F)(F)S(=O)(=O)NCC=C	NCC=C	FC(F)(F)C(F)(F)C(F)(F)C(F)(F)C(F)(F)C(F)(F)C(F)(F)S(=O)=O	1	S(=O)(=O)			67584-49-0	FC(F)(F)C(F)(F)C(F)(F)C(F)(F)C(F)(F)C(F)(F)C(F)(F)S(=O)(=O)NCC=C	BWDDXILIAIZLEX-UHFFFAOYSA-N	Organic compounds	Organic acids and derivatives	Organic sulfonic acids and derivatives	Organosulfonic acids and derivatives	Organosulfonamides	This compound belongs to the class of organic compounds known as organosulfonamides. These are compounds containing the sulfonamide functional group, an amide of sulfonic acid with the general structure R1S(=O)2N(R2)R3 (R1=alkyl, aryl; R2,R3=H, alkyl, aryl).	Aliphatic acyclic compounds	SMILES			67584-49-0	CCCCCCCS(=O)(=O)NCC=C	FINUIIVCQPMXPH-UHFFFAOYSA-N	Organic compounds	Organic acids and derivatives	Organic sulfonic acids and derivatives	Organosulfonic acids and derivatives	Organosulfonamides	This compound belongs to the class of organic compounds known as organosulfonamides. These are compounds containing the sulfonamide functional group, an amide of sulfonic acid with the general structure R1S(=O)2N(R2)R3 (R1=alkyl, aryl; R2,R3=H, alkyl, aryl).	Aliphatic acyclic compounds	SMILES
3089	67584-50-3	1-Heptanesulfonamide, N-ethyl-1,1,2,2,3,3,4,4,5,5,6,6,7,7,7-pentadecafluoro-N-[3-(trichlorosilyl)propyl]-	N-Ethyl-1,1,2,2,3,3,4,4,5,5,6,6,7,7,7-pentadecafluoro-N-[3-(trichlorosilyl)propyl]-1-heptanesulfonamide	C12 H11 Cl3 F15 N O2 S Si	CCN(CCC[Si](Cl)(Cl)Cl)S(=O)(=O)C(F)(F)C(F)(F)C(F)(F)C(F)(F)C(F)(F)C(F)(F)C(F)(F)F		203.04	perfluoroalkane sulfonyl silanes	1	7	1	1	0	0	NA	0		CCN(CCC[Si](Cl)(Cl)Cl)S(=O)(=O)C(F)(F)C(F)(F)C(F)(F)C(F)(F)C(F)(F)C(F)(F)C(F)(F)F	CCNCCC[Si](Cl)(Cl)Cl	S(=O)(=O)C(F)(F)C(F)(F)C(F)(F)C(F)(F)C(F)(F)C(F)(F)C(F)(F)F	1	S(=O)(=O)			67584-50-3	CCN(CCC[Si](Cl)(Cl)Cl)S(=O)(=O)C(F)(F)C(F)(F)C(F)(F)C(F)(F)C(F)(F)C(F)(F)C(F)(F)F	FGUIJRKFZDKNCE-UHFFFAOYSA-N	Organic compounds	Organic acids and derivatives	Organic sulfonic acids and derivatives	Organosulfonic acids and derivatives	Organosulfonamides	This compound belongs to the class of organic compounds known as organosulfonamides. These are compounds containing the sulfonamide functional group, an amide of sulfonic acid with the general structure R1S(=O)2N(R2)R3 (R1=alkyl, aryl; R2,R3=H, alkyl, aryl).	Aliphatic acyclic compounds	SMILES			67584-50-3	CCN(CCC[Si](Cl)(Cl)Cl)S(=O)(=O)CCCCCCC	PSNBYFRDBJFCOQ-UHFFFAOYSA-N	Organic compounds	Organic acids and derivatives	Organic sulfonic acids and derivatives	Organosulfonic acids and derivatives	Organosulfonamides	This compound belongs to the class of organic compounds known as organosulfonamides. These are compounds containing the sulfonamide functional group, an amide of sulfonic acid with the general structure R1S(=O)2N(R2)R3 (R1=alkyl, aryl; R2,R3=H, alkyl, aryl).	Aliphatic acyclic compounds	SMILES
3090	67584-60-5	2-Propenoic acid, 2-methyl-, 2-[methyl[(1,1,2,2,3,3,4,4,5,5,5-undecafluoropentyl)sulfonyl]amino]ethyl ester	2-Propenoic acid, 2-methyl-, 2-[methyl[(undecafluoropentyl)sulfonyl]amino]ethyl ester (9CI)	C12 H12 F11 N O4 S	CN(CCOC(=O)C(C)=C)S(=O)(=O)C(F)(F)C(F)(F)C(F)(F)C(F)(F)C(F)(F)F		203.03	perfluoroalkane sulfonyl (meth)acrylates	1	5	1	1	0	0	NA	0		CN(CCOC(=O)C(C)=C)S(=O)(=O)C(F)(F)C(F)(F)C(F)(F)C(F)(F)C(F)(F)F	CNCCOC(=O)C(C)=C	S(=O)(=O)C(F)(F)C(F)(F)C(F)(F)C(F)(F)C(F)(F)F	1	S(=O)(=O)			67584-60-5	CN(CCOC(=O)C(C)=C)S(=O)(=O)C(F)(F)C(F)(F)C(F)(F)C(F)(F)C(F)(F)F	ADSKDYCFRLKFDJ-UHFFFAOYSA-N	Organic compounds	Organic acids and derivatives	Organic sulfonic acids and derivatives	Organosulfonic acids and derivatives	Organosulfonamides	This compound belongs to the class of organic compounds known as organosulfonamides. These are compounds containing the sulfonamide functional group, an amide of sulfonic acid with the general structure R1S(=O)2N(R2)R3 (R1=alkyl, aryl; R2,R3=H, alkyl, aryl).	Aliphatic acyclic compounds	SMILES			67584-60-5	CN(CCOC(=O)C(C)=C)S(=O)(=O)CCCCC	TWNDCKXWIZCEBO-UHFFFAOYSA-N	Organic compounds	Organic acids and derivatives	Organic sulfonic acids and derivatives	Organosulfonic acids and derivatives	Organosulfonamides	This compound belongs to the class of organic compounds known as organosulfonamides. These are compounds containing the sulfonamide functional group, an amide of sulfonic acid with the general structure R1S(=O)2N(R2)R3 (R1=alkyl, aryl; R2,R3=H, alkyl, aryl).	Aliphatic acyclic compounds	SMILES
3091	67584-63-8	Glycine, N-ethyl-N-[(1,1,2,2,3,3,4,4,4-nonafluorobutyl)sulfonyl]-, ethyl ester	Glycine, N-ethyl-N-[(nonafluorobutyl)sulfonyl]-, ethyl ester (9CI)	C10 H12 F9 N O4 S	CCOC(=O)CN(CC)S(=O)(=O)C(F)(F)C(F)(F)C(F)(F)C(F)(F)F		203.05	perfluoroalkane sulfonyl acetic acids & esters	1	4	1	1	0	0	NA	0		CCOC(=O)CN(CC)S(=O)(=O)C(F)(F)C(F)(F)C(F)(F)C(F)(F)F	CCOC(=O)CNCC	S(=O)(=O)C(F)(F)C(F)(F)C(F)(F)C(F)(F)F	1	S(=O)(=O)			67584-63-8	CCOC(=O)CN(CC)S(=O)(=O)C(F)(F)C(F)(F)C(F)(F)C(F)(F)F	FUWUVCJRFPBKEF-UHFFFAOYSA-N	Organic compounds	Organic acids and derivatives	Carboxylic acids and derivatives	Amino acids, peptides, and analogues	Alpha amino acid esters	This compound belongs to the class of organic compounds known as alpha amino acid esters. These are ester derivatives of alpha amino acids.	Aliphatic acyclic compounds	SMILES			67584-63-8	CCOC(=O)CN(CC)S(=O)(=O)CCCC	IRYYABPWNXWUFQ-UHFFFAOYSA-N	Organic compounds	Organic acids and derivatives	Carboxylic acids and derivatives	Amino acids, peptides, and analogues	Alpha amino acid esters	This compound belongs to the class of organic compounds known as alpha amino acid esters. These are ester derivatives of alpha amino acids.	Aliphatic acyclic compounds	SMILES
3092	67906-38-1	2-Propenoic acid, 2-methyl-, 4-[methyl[(1,1,2,2,3,3,4,4,5,5,6,6,7,7,7-pentadecafluoroheptyl)sulfonyl]amino]butyl ester	2-Propenoic acid, 2-methyl-, 4-[methyl[(pentadecafluoroheptyl)sulfonyl]amino]butyl ester (9CI)	C16 H16 F15 N O4 S	CN(CCCCOC(=O)C(C)=C)S(=O)(=O)C(F)(F)C(F)(F)C(F)(F)C(F)(F)C(F)(F)C(F)(F)C(F)(F)F		203.03	perfluoroalkane sulfonyl (meth)acrylates	1	7	1	1	0	0	NA	0		CN(CCCCOC(=O)C(C)=C)S(=O)(=O)C(F)(F)C(F)(F)C(F)(F)C(F)(F)C(F)(F)C(F)(F)C(F)(F)F	CNCCCCOC(=O)C(C)=C	S(=O)(=O)C(F)(F)C(F)(F)C(F)(F)C(F)(F)C(F)(F)C(F)(F)C(F)(F)F	1	S(=O)(=O)			67906-38-1	CN(CCCCOC(=O)C(C)=C)S(=O)(=O)C(F)(F)C(F)(F)C(F)(F)C(F)(F)C(F)(F)C(F)(F)C(F)(F)F	CRGIYPZDEQHQFH-UHFFFAOYSA-N	Organic compounds	Organic acids and derivatives	Organic sulfonic acids and derivatives	Organosulfonic acids and derivatives	Organosulfonamides	This compound belongs to the class of organic compounds known as organosulfonamides. These are compounds containing the sulfonamide functional group, an amide of sulfonic acid with the general structure R1S(=O)2N(R2)R3 (R1=alkyl, aryl; R2,R3=H, alkyl, aryl).	Aliphatic acyclic compounds	SMILES			67906-38-1	CN(CCCCOC(=O)C(C)=C)S(=O)(=O)CCCCCCC	LFZQMHVSQGVNON-UHFFFAOYSA-N	Organic compounds	Organic acids and derivatives	Organic sulfonic acids and derivatives	Organosulfonic acids and derivatives	Organosulfonamides	This compound belongs to the class of organic compounds known as organosulfonamides. These are compounds containing the sulfonamide functional group, an amide of sulfonic acid with the general structure R1S(=O)2N(R2)R3 (R1=alkyl, aryl; R2,R3=H, alkyl, aryl).	Aliphatic acyclic compounds	SMILES
3093	67906-39-2	2-Propenoic acid, 2-methyl-, 4-[methyl[(1,1,2,2,3,3,4,4,4-nonafluorobutyl)sulfonyl]amino]butyl ester	2-Propenoic acid, 2-methyl-, 4-[methyl[(nonafluorobutyl)sulfonyl]amino]butyl ester (9CI)	C13 H16 F9 N O4 S	CN(CCCCOC(=O)C(C)=C)S(=O)(=O)C(F)(F)C(F)(F)C(F)(F)C(F)(F)F		203.03	perfluoroalkane sulfonyl (meth)acrylates	1	4	1	1	0	0	NA	0		CN(CCCCOC(=O)C(C)=C)S(=O)(=O)C(F)(F)C(F)(F)C(F)(F)C(F)(F)F	CNCCCCOC(=O)C(C)=C	S(=O)(=O)C(F)(F)C(F)(F)C(F)(F)C(F)(F)F	1	S(=O)(=O)			67906-39-2	CN(CCCCOC(=O)C(C)=C)S(=O)(=O)C(F)(F)C(F)(F)C(F)(F)C(F)(F)F	GJCCTHAVFKJHMN-UHFFFAOYSA-N	Organic compounds	Organic acids and derivatives	Organic sulfonic acids and derivatives	Organosulfonic acids and derivatives	Organosulfonamides	This compound belongs to the class of organic compounds known as organosulfonamides. These are compounds containing the sulfonamide functional group, an amide of sulfonic acid with the general structure R1S(=O)2N(R2)R3 (R1=alkyl, aryl; R2,R3=H, alkyl, aryl).	Aliphatic acyclic compounds	SMILES			67906-39-2	CN(CCCCOC(=O)C(C)=C)S(=O)(=O)CCCC	YMAINJVKZJDWQW-UHFFFAOYSA-N	Organic compounds	Organic acids and derivatives	Organic sulfonic acids and derivatives	Organosulfonic acids and derivatives	Organosulfonamides	This compound belongs to the class of organic compounds known as organosulfonamides. These are compounds containing the sulfonamide functional group, an amide of sulfonic acid with the general structure R1S(=O)2N(R2)R3 (R1=alkyl, aryl; R2,R3=H, alkyl, aryl).	Aliphatic acyclic compounds	SMILES
3094	67906-40-5	2-Propenoic acid, 2-methyl-, 4-[methyl[(1,1,2,2,3,3,4,4,5,5,5-undecafluoropentyl)sulfonyl]amino]butyl ester	2-Propenoic acid, 2-methyl-, 4-[methyl[(undecafluoropentyl)sulfonyl]amino]butyl ester (9CI)	C14 H16 F11 N O4 S	CN(CCCCOC(=O)C(C)=C)S(=O)(=O)C(F)(F)C(F)(F)C(F)(F)C(F)(F)C(F)(F)F		203.03	perfluoroalkane sulfonyl (meth)acrylates	1	5	1	1	0	0	NA	0		CN(CCCCOC(=O)C(C)=C)S(=O)(=O)C(F)(F)C(F)(F)C(F)(F)C(F)(F)C(F)(F)F	CNCCCCOC(=O)C(C)=C	S(=O)(=O)C(F)(F)C(F)(F)C(F)(F)C(F)(F)C(F)(F)F	1	S(=O)(=O)			67906-40-5	CN(CCCCOC(=O)C(C)=C)S(=O)(=O)C(F)(F)C(F)(F)C(F)(F)C(F)(F)C(F)(F)F	OSMPUFUJALYWAR-UHFFFAOYSA-N	Organic compounds	Organic acids and derivatives	Organic sulfonic acids and derivatives	Organosulfonic acids and derivatives	Organosulfonamides	This compound belongs to the class of organic compounds known as organosulfonamides. These are compounds containing the sulfonamide functional group, an amide of sulfonic acid with the general structure R1S(=O)2N(R2)R3 (R1=alkyl, aryl; R2,R3=H, alkyl, aryl).	Aliphatic acyclic compounds	SMILES			67906-40-5	CN(CCCCOC(=O)C(C)=C)S(=O)(=O)CCCCC	OTBBCIGTAJMNJX-UHFFFAOYSA-N	Organic compounds	Organic acids and derivatives	Organic sulfonic acids and derivatives	Organosulfonic acids and derivatives	Organosulfonamides	This compound belongs to the class of organic compounds known as organosulfonamides. These are compounds containing the sulfonamide functional group, an amide of sulfonic acid with the general structure R1S(=O)2N(R2)R3 (R1=alkyl, aryl; R2,R3=H, alkyl, aryl).	Aliphatic acyclic compounds	SMILES
3095	67906-41-6	1-Heptanesulfonamide, N-ethyl-1,1,2,2,3,3,4,4,5,5,6,6,7,7,7-pentadecafluoro-N-2-propen-1-yl-	1-Heptanesulfonamide, N-ethyl-1,1,2,2,3,3,4,4,5,5,6,6,7,7,7-pentadecafluoro-N-2-propenyl- (9CI); N-Ethyl-1,1,2,2,3,3,4,4,5,5,6,6,7,7,7-pentadecafluoro-N-2-propen-1-yl-1-heptanesulfonamide	C12 H10 F15 N O2 S	CCN(CC=C)S(=O)(=O)C(F)(F)C(F)(F)C(F)(F)C(F)(F)C(F)(F)C(F)(F)C(F)(F)F		203	perfluoroalkane sulfonyl-based nonpolymers	1	7	1	1	0	0	NA	0		CCN(CC=C)S(=O)(=O)C(F)(F)C(F)(F)C(F)(F)C(F)(F)C(F)(F)C(F)(F)C(F)(F)F	CCNCC=C	S(=O)(=O)C(F)(F)C(F)(F)C(F)(F)C(F)(F)C(F)(F)C(F)(F)C(F)(F)F	1	S(=O)(=O)			67906-41-6	CCN(CC=C)S(=O)(=O)C(F)(F)C(F)(F)C(F)(F)C(F)(F)C(F)(F)C(F)(F)C(F)(F)F	ZVXUTAWOTSBUQR-UHFFFAOYSA-N	Organic compounds	Organic acids and derivatives	Organic sulfonic acids and derivatives	Organosulfonic acids and derivatives	Organosulfonamides	This compound belongs to the class of organic compounds known as organosulfonamides. These are compounds containing the sulfonamide functional group, an amide of sulfonic acid with the general structure R1S(=O)2N(R2)R3 (R1=alkyl, aryl; R2,R3=H, alkyl, aryl).	Aliphatic acyclic compounds	SMILES			67906-41-6	CCN(CC=C)S(=O)(=O)CCCCCCC	PVKPANULVZSBJU-UHFFFAOYSA-N	Organic compounds	Organic acids and derivatives	Organic sulfonic acids and derivatives	Organosulfonic acids and derivatives	Organosulfonamides	This compound belongs to the class of organic compounds known as organosulfonamides. These are compounds containing the sulfonamide functional group, an amide of sulfonic acid with the general structure R1S(=O)2N(R2)R3 (R1=alkyl, aryl; R2,R3=H, alkyl, aryl).	Aliphatic acyclic compounds	SMILES
3098	67923-61-9	1-Heptanesulfonamide, N-ethyl-1,1,2,2,3,3,4,4,5,5,6,6,7,7,7-pentadecafluoro-N-[2-(phosphonooxy)ethyl]-	N-Ethyl-1,1,2,2,3,3,4,4,5,5,6,6,7,7,7-pentadecafluoro-N-[2-(phosphonooxy)ethyl]-1-heptanesulfonamide	C11 H11 F15 N O6 P S	CCN(CCOP(O)(O)=O)S(=O)(=O)C(F)(F)C(F)(F)C(F)(F)C(F)(F)C(F)(F)C(F)(F)C(F)(F)F		203.02	perfluoroalkane sulfonyl amido ethanols, phosphate esters (SAmPAPs)	1	7	1	1	0	0	NA	0		CCN(CCOP(O)(O)=O)S(=O)(=O)C(F)(F)C(F)(F)C(F)(F)C(F)(F)C(F)(F)C(F)(F)C(F)(F)F	CCNCCOP(O)(O)=O	S(=O)(=O)C(F)(F)C(F)(F)C(F)(F)C(F)(F)C(F)(F)C(F)(F)C(F)(F)F	1	S(=O)(=O)			67923-61-9	CCN(CCOP(O)(O)=O)S(=O)(=O)C(F)(F)C(F)(F)C(F)(F)C(F)(F)C(F)(F)C(F)(F)C(F)(F)F	FANHPMCIAHYLOD-UHFFFAOYSA-N	Organic compounds	Organic acids and derivatives	Organic phosphoric acids and derivatives	Phosphate esters	Phosphoethanolamines	This compound belongs to the class of organic compounds known as phosphoethanolamines. These are compounds containing a phosphate linked to the second carbon of an ethanolamine.	Aliphatic acyclic compounds	SMILES			67923-61-9	CCN(CCOP(O)(O)=O)S(=O)(=O)CCCCCCC	OKIMKFKGPVUBEI-UHFFFAOYSA-N	Organic compounds	Organic acids and derivatives	Organic phosphoric acids and derivatives	Phosphate esters	Phosphoethanolamines	This compound belongs to the class of organic compounds known as phosphoethanolamines. These are compounds containing a phosphate linked to the second carbon of an ethanolamine.	Aliphatic acyclic compounds	SMILES
3101	67939-61-1	2-Propenoic acid, 2-methyl-, 4-[methyl[(1,1,2,2,3,3,4,4,5,5,6,6,6-tridecafluorohexyl)sulfonyl]amino]butyl ester	2-Propenoic acid, 2-methyl-, 4-[methyl[(tridecafluorohexyl)sulfonyl]amino]butyl ester (9CI)	C15 H16 F13 N O4 S	CN(CCCCOC(=O)C(C)=C)S(=O)(=O)C(F)(F)C(F)(F)C(F)(F)C(F)(F)C(F)(F)C(F)(F)F		203.03	perfluoroalkane sulfonyl (meth)acrylates	1	6	1	1	0	0	NA	0		CN(CCCCOC(=O)C(C)=C)S(=O)(=O)C(F)(F)C(F)(F)C(F)(F)C(F)(F)C(F)(F)C(F)(F)F	CNCCCCOC(=O)C(C)=C	S(=O)(=O)C(F)(F)C(F)(F)C(F)(F)C(F)(F)C(F)(F)C(F)(F)F	1	S(=O)(=O)			67939-61-1	CN(CCCCOC(=O)C(C)=C)S(=O)(=O)C(F)(F)C(F)(F)C(F)(F)C(F)(F)C(F)(F)C(F)(F)F	KKCCHFWHAXJXIQ-UHFFFAOYSA-N	Organic compounds	Organic acids and derivatives	Organic sulfonic acids and derivatives	Organosulfonic acids and derivatives	Organosulfonamides	This compound belongs to the class of organic compounds known as organosulfonamides. These are compounds containing the sulfonamide functional group, an amide of sulfonic acid with the general structure R1S(=O)2N(R2)R3 (R1=alkyl, aryl; R2,R3=H, alkyl, aryl).	Aliphatic acyclic compounds	SMILES			67939-61-1	CN(CCCCOC(=O)C(C)=C)S(=O)(=O)CCCCCC	NTZVILDIMPUZQX-UHFFFAOYSA-N	Organic compounds	Organic acids and derivatives	Organic sulfonic acids and derivatives	Organosulfonic acids and derivatives	Organosulfonamides	This compound belongs to the class of organic compounds known as organosulfonamides. These are compounds containing the sulfonamide functional group, an amide of sulfonic acid with the general structure R1S(=O)2N(R2)R3 (R1=alkyl, aryl; R2,R3=H, alkyl, aryl).	Aliphatic acyclic compounds	SMILES
3104	67939-87-1	1-Pentanesulfonamide, N,N'-[phosphinicobis(oxy-2,1-ethanediyl)]bis[N-ethyl-1,1,2,2,3,3,4,4,5,5,5-undecafluoro-	N,N'-[Phosphinicobis(oxy-2,1-ethanediyl)]bis[N-ethyl-1,1,2,2,3,3,4,4,5,5,5-undecafluoro-1-pentanesulfonamide]; Ethanol, 2-[ethyl[(1,1,2,2,3,3,4,4,5,5,5-undecafluoropentyl)sulfonyl]amino]-, hydrogen phosphate (ester)	C18 H19 F22 N2 O8 P S2	CCN(CCOP(O)(=O)OCCN(CC)S(=O)(=O)C(F)(F)C(F)(F)C(F)(F)C(F)(F)C(F)(F)F)S(=O)(=O)C(F)(F)C(F)(F)C(F)(F)C(F)(F)C(F)(F)F		203.02	perfluoroalkane sulfonyl amido ethanols, phosphate esters (SAmPAPs)	1	5	1	1	0	0	NA	0		CCN(CCOP(O)(=O)OCCN(CC)S(=O)(=O)C(F)(F)C(F)(F)C(F)(F)C(F)(F)C(F)(F)F)S(=O)(=O)C(F)(F)C(F)(F)C(F)(F)C(F)(F)C(F)(F)F	CCNCCOP(O)(=O)OCCNCC	S(=O)(=O)C(F)(F)C(F)(F)C(F)(F)C(F)(F)C(F)(F)F	2	S(=O)(=O)		5.3	67939-87-1	CCN(CCOP(O)(=O)OCCN(CC)S(=O)(=O)C(F)(F)C(F)(F)C(F)(F)C(F)(F)C(F)(F)F)S(=O)(=O)C(F)(F)C(F)(F)C(F)(F)C(F)(F)C(F)(F)F	RJFPABCSTACHQG-UHFFFAOYSA-N	Organic compounds	Organic acids and derivatives	Organic phosphoric acids and derivatives	Phosphate esters	Phosphoethanolamines	This compound belongs to the class of organic compounds known as phosphoethanolamines. These are compounds containing a phosphate linked to the second carbon of an ethanolamine.	Aliphatic acyclic compounds	SMILES			67939-87-1	CCN(CCOP(O)(=O)OCCN(CC)S(=O)(=O)CCCCC)S(=O)(=O)CCCCC	OIZDWRBJHBDGOA-UHFFFAOYSA-N	Organic compounds	Organic acids and derivatives	Organic phosphoric acids and derivatives	Phosphate esters	Phosphoethanolamines	This compound belongs to the class of organic compounds known as phosphoethanolamines. These are compounds containing a phosphate linked to the second carbon of an ethanolamine.	Aliphatic acyclic compounds	SMILES
3105	67939-89-3	1-Butanesulfonamide, N-ethyl-1,1,2,2,3,3,4,4,4-nonafluoro-N-[2-(phosphonooxy)ethyl]-	N-Ethyl-1,1,2,2,3,3,4,4,4-nonafluoro-N-[2-(phosphonooxy)ethyl]-1-butanesulfonamide; Ethanol, 2-[ethyl[(1,1,2,2,3,3,4,4,4-nonafluorobutyl)sulfonyl]amino]-, dihydrogen phosphate	C8 H11 F9 N O6 P S	CCN(CCOP(O)(O)=O)S(=O)(=O)C(F)(F)C(F)(F)C(F)(F)C(F)(F)F		203.02	perfluoroalkane sulfonyl amido ethanols, phosphate esters (SAmPAPs)	1	4	1	1	0	0	NA	0		CCN(CCOP(O)(O)=O)S(=O)(=O)C(F)(F)C(F)(F)C(F)(F)C(F)(F)F	CCNCCOP(O)(O)=O	S(=O)(=O)C(F)(F)C(F)(F)C(F)(F)C(F)(F)F	1	S(=O)(=O)			67939-89-3	CCN(CCOP(O)(O)=O)S(=O)(=O)C(F)(F)C(F)(F)C(F)(F)C(F)(F)F	QYPFYWKDTABJCJ-UHFFFAOYSA-N	Organic compounds	Organic acids and derivatives	Organic phosphoric acids and derivatives	Phosphate esters	Phosphoethanolamines	This compound belongs to the class of organic compounds known as phosphoethanolamines. These are compounds containing a phosphate linked to the second carbon of an ethanolamine.	Aliphatic acyclic compounds	SMILES			67939-89-3	CCN(CCOP(O)(O)=O)S(=O)(=O)CCCC	GBCQAPROMWGVAQ-UHFFFAOYSA-N	Organic compounds	Organic acids and derivatives	Organic phosphoric acids and derivatives	Phosphate esters	Phosphoethanolamines	This compound belongs to the class of organic compounds known as phosphoethanolamines. These are compounds containing a phosphate linked to the second carbon of an ethanolamine.	Aliphatic acyclic compounds	SMILES
3106	67939-90-6	1-Pentanesulfonamide, N-ethyl-1,1,2,2,3,3,4,4,5,5,5-undecafluoro-N-[2-(phosphonooxy)ethyl]-	N-Ethyl-1,1,2,2,3,3,4,4,5,5,5-undecafluoro-N-[2-(phosphonooxy)ethyl]-1-pentanesulfonamide	C9 H11 F11 N O6 P S	CCN(CCOP(O)(O)=O)S(=O)(=O)C(F)(F)C(F)(F)C(F)(F)C(F)(F)C(F)(F)F		203.02	perfluoroalkane sulfonyl amido ethanols, phosphate esters (SAmPAPs)	1	5	1	1	0	0	NA	0		CCN(CCOP(O)(O)=O)S(=O)(=O)C(F)(F)C(F)(F)C(F)(F)C(F)(F)C(F)(F)F	CCNCCOP(O)(O)=O	S(=O)(=O)C(F)(F)C(F)(F)C(F)(F)C(F)(F)C(F)(F)F	1	S(=O)(=O)			67939-90-6	CCN(CCOP(O)(O)=O)S(=O)(=O)C(F)(F)C(F)(F)C(F)(F)C(F)(F)C(F)(F)F	PSNGOBTXZSFMLP-UHFFFAOYSA-N	Organic compounds	Organic acids and derivatives	Organic phosphoric acids and derivatives	Phosphate esters	Phosphoethanolamines	This compound belongs to the class of organic compounds known as phosphoethanolamines. These are compounds containing a phosphate linked to the second carbon of an ethanolamine.	Aliphatic acyclic compounds	SMILES			67939-90-6	CCN(CCOP(O)(O)=O)S(=O)(=O)CCCCC	GRGBNOUQSKZPBD-UHFFFAOYSA-N	Organic compounds	Organic acids and derivatives	Organic phosphoric acids and derivatives	Phosphate esters	Phosphoethanolamines	This compound belongs to the class of organic compounds known as phosphoethanolamines. These are compounds containing a phosphate linked to the second carbon of an ethanolamine.	Aliphatic acyclic compounds	SMILES
3107	67939-91-7	1-Butanesulfonamide, N,N'-[phosphinicobis(oxy-2,1-ethanediyl)]bis[N-ethyl-1,1,2,2,3,3,4,4,4-nonafluoro-	N,N'-[Phosphinicobis(oxy-2,1-ethanediyl)]bis[N-ethyl-1,1,2,2,3,3,4,4,4-nonafluoro-1-butanesulfonamide]	C16 H19 F18 N2 O8 P S2	CCN(CCOP(O)(=O)OCCN(CC)S(=O)(=O)C(F)(F)C(F)(F)C(F)(F)C(F)(F)F)S(=O)(=O)C(F)(F)C(F)(F)C(F)(F)C(F)(F)F		203.02	perfluoroalkane sulfonyl amido ethanols, phosphate esters (SAmPAPs)	1	4	1	1	0	0	NA	0		CCN(CCOP(O)(=O)OCCN(CC)S(=O)(=O)C(F)(F)C(F)(F)C(F)(F)C(F)(F)F)S(=O)(=O)C(F)(F)C(F)(F)C(F)(F)C(F)(F)F	CCNCCOP(O)(=O)OCCNCC	S(=O)(=O)C(F)(F)C(F)(F)C(F)(F)C(F)(F)F	2	S(=O)(=O)		5.3	67939-91-7	CCN(CCOP(O)(=O)OCCN(CC)S(=O)(=O)C(F)(F)C(F)(F)C(F)(F)C(F)(F)F)S(=O)(=O)C(F)(F)C(F)(F)C(F)(F)C(F)(F)F	UNHYIZUGCWLZHI-UHFFFAOYSA-N	Organic compounds	Organic acids and derivatives	Organic phosphoric acids and derivatives	Phosphate esters	Phosphoethanolamines	This compound belongs to the class of organic compounds known as phosphoethanolamines. These are compounds containing a phosphate linked to the second carbon of an ethanolamine.	Aliphatic acyclic compounds	SMILES			67939-91-7	CCN(CCOP(O)(=O)OCCN(CC)S(=O)(=O)CCCC)S(=O)(=O)CCCC	IEXZPMNRPJNUDS-UHFFFAOYSA-N	Organic compounds	Organic acids and derivatives	Organic phosphoric acids and derivatives	Phosphate esters	Phosphoethanolamines	This compound belongs to the class of organic compounds known as phosphoethanolamines. These are compounds containing a phosphate linked to the second carbon of an ethanolamine.	Aliphatic acyclic compounds	SMILES
3108	67939-93-9	1-Heptanesulfonamide, N,N'-[phosphinicobis(oxy-2,1-ethanediyl)]bis[N-ethyl-1,1,2,2,3,3,4,4,5,5,6,6,7,7,7-pentadecafluoro-	N,N'-[Phosphinicobis(oxy-2,1-ethanediyl)]bis[N-ethyl-1,1,2,2,3,3,4,4,5,5,6,6,7,7,7-pentadecafluoro-1-heptanesulfonamide]	C22 H19 F30 N2 O8 P S2	CCN(CCOP(O)(=O)OCCN(CC)S(=O)(=O)C(F)(F)C(F)(F)C(F)(F)C(F)(F)C(F)(F)C(F)(F)C(F)(F)F)S(=O)(=O)C(F)(F)C(F)(F)C(F)(F)C(F)(F)C(F)(F)C(F)(F)C(F)(F)F		203.02	perfluoroalkane sulfonyl amido ethanols, phosphate esters (SAmPAPs)	1	7	1	1	0	0	NA	0		CCN(CCOP(O)(=O)OCCN(CC)S(=O)(=O)C(F)(F)C(F)(F)C(F)(F)C(F)(F)C(F)(F)C(F)(F)C(F)(F)F)S(=O)(=O)C(F)(F)C(F)(F)C(F)(F)C(F)(F)C(F)(F)C(F)(F)C(F)(F)F	CCNCCOP(O)(=O)OCCNCC	S(=O)(=O)C(F)(F)C(F)(F)C(F)(F)C(F)(F)C(F)(F)C(F)(F)C(F)(F)F	2	S(=O)(=O)		5.3	67939-93-9	CCN(CCOP(O)(=O)OCCN(CC)S(=O)(=O)C(F)(F)C(F)(F)C(F)(F)C(F)(F)C(F)(F)C(F)(F)C(F)(F)F)S(=O)(=O)C(F)(F)C(F)(F)C(F)(F)C(F)(F)C(F)(F)C(F)(F)C(F)(F)F	YCAARETZDBIMDL-UHFFFAOYSA-N	Organic compounds	Organic acids and derivatives	Organic phosphoric acids and derivatives	Phosphate esters	Phosphoethanolamines	This compound belongs to the class of organic compounds known as phosphoethanolamines. These are compounds containing a phosphate linked to the second carbon of an ethanolamine.	Aliphatic acyclic compounds	SMILES			67939-93-9	CCN(CCOP(O)(=O)OCCN(CC)S(=O)(=O)CCCCCCC)S(=O)(=O)CCCCCCC	GTRSPIQBIYCFIF-UHFFFAOYSA-N	Organic compounds	Organic acids and derivatives	Organic phosphoric acids and derivatives	Phosphate esters	Phosphoethanolamines	This compound belongs to the class of organic compounds known as phosphoethanolamines. These are compounds containing a phosphate linked to the second carbon of an ethanolamine.	Aliphatic acyclic compounds	SMILES
3109	67939-94-0	1-Heptanesulfonamide, N,N',N''-[phosphinylidynetris(oxy-2,1-ethanediyl)]tris[N-ethyl-1,1,2,2,3,3,4,4,5,5,6,6,7,7,7-pentadecafluoro-	N,N',N''-[Phosphinylidynetris(oxy-2,1-ethanediyl)]tris[N-ethyl-1,1,2,2,3,3,4,4,5,5,6,6,7,7,7-pentadecafluoro-1-heptanesulfonamide]	C33 H27 F45 N3 O10 P S3	CCN(CCOP(=O)(OCCN(CC)S(=O)(=O)C(F)(F)C(F)(F)C(F)(F)C(F)(F)C(F)(F)C(F)(F)C(F)(F)F)OCCN(CC)S(=O)(=O)C(F)(F)C(F)(F)C(F)(F)C(F)(F)C(F)(F)C(F)(F)C(F)(F)F)S(=O)(=O)C(F)(F)C(F)(F)C(F)(F)C(F)(F)C(F)(F)C(F)(F)C(F)(F)F		203.02	perfluoroalkane sulfonyl amido ethanols, phosphate esters (SAmPAPs)	1	7	1	1	0	0	NA	0		CCN(CCOP(=O)(OCCN(CC)S(=O)(=O)C(F)(F)C(F)(F)C(F)(F)C(F)(F)C(F)(F)C(F)(F)C(F)(F)F)OCCN(CC)S(=O)(=O)C(F)(F)C(F)(F)C(F)(F)C(F)(F)C(F)(F)C(F)(F)C(F)(F)F)S(=O)(=O)C(F)(F)C(F)(F)C(F)(F)C(F)(F)C(F)(F)C(F)(F)C(F)(F)F	CCNCCOP(=O)(OCCNCC)OCCNCC	S(=O)(=O)C(F)(F)C(F)(F)C(F)(F)C(F)(F)C(F)(F)C(F)(F)C(F)(F)F	3	S(=O)(=O)		5.3	67939-94-0	CCN(CCOP(=O)(OCCN(CC)S(=O)(=O)C(F)(F)C(F)(F)C(F)(F)C(F)(F)C(F)(F)C(F)(F)C(F)(F)F)OCCN(CC)S(=O)(=O)C(F)(F)C(F)(F)C(F)(F)C(F)(F)C(F)(F)C(F)(F)C(F)(F)F)S(=O)(=O)C(F)(F)C(F)(F)C(F)(F)C(F)(F)C(F)(F)C(F)(F)C(F)(F)F	DPBVCOWHHLIHJN-UHFFFAOYSA-N	Organic compounds	Organic acids and derivatives	Organic phosphoric acids and derivatives	Phosphate esters	Phosphoethanolamines	This compound belongs to the class of organic compounds known as phosphoethanolamines. These are compounds containing a phosphate linked to the second carbon of an ethanolamine.	Aliphatic acyclic compounds	SMILES			67939-94-0	CCN(CCOP(=O)(OCCN(CC)S(=O)(=O)CCCCCCC)OCCN(CC)S(=O)(=O)CCCCCCC)S(=O)(=O)CCCCCCC	GYDGVHUNAYXEHC-UHFFFAOYSA-N	Organic compounds	Organic acids and derivatives	Organic phosphoric acids and derivatives	Phosphate esters	Phosphoethanolamines	This compound belongs to the class of organic compounds known as phosphoethanolamines. These are compounds containing a phosphate linked to the second carbon of an ethanolamine.	Aliphatic acyclic compounds	SMILES
3112	67969-65-7	1-Hexanesulfonamide, N-ethyl-1,1,2,2,3,3,4,4,5,5,6,6,6-tridecafluoro-N-[2-(phosphonooxy)ethyl]-	N-Ethyl-1,1,2,2,3,3,4,4,5,5,6,6,6-tridecafluoro-N-[2-(phosphonooxy)ethyl]-1-hexanesulfonamide	C10 H11 F13 N O6 P S	CCN(CCOP(O)(O)=O)S(=O)(=O)C(F)(F)C(F)(F)C(F)(F)C(F)(F)C(F)(F)C(F)(F)F		203.02	perfluoroalkane sulfonyl amido ethanols, phosphate esters (SAmPAPs)	1	6	1	1	0	0	NA	0		CCN(CCOP(O)(O)=O)S(=O)(=O)C(F)(F)C(F)(F)C(F)(F)C(F)(F)C(F)(F)C(F)(F)F	CCNCCOP(O)(O)=O	S(=O)(=O)C(F)(F)C(F)(F)C(F)(F)C(F)(F)C(F)(F)C(F)(F)F	1	S(=O)(=O)			67969-65-7	CCN(CCOP(O)(O)=O)S(=O)(=O)C(F)(F)C(F)(F)C(F)(F)C(F)(F)C(F)(F)C(F)(F)F	WKGHYGHEIVLMOZ-UHFFFAOYSA-N	Organic compounds	Organic acids and derivatives	Organic phosphoric acids and derivatives	Phosphate esters	Phosphoethanolamines	This compound belongs to the class of organic compounds known as phosphoethanolamines. These are compounds containing a phosphate linked to the second carbon of an ethanolamine.	Aliphatic acyclic compounds	SMILES			67969-65-7	CCN(CCOP(O)(O)=O)S(=O)(=O)CCCCCC	XAEDTRLNGRKUBT-UHFFFAOYSA-N	Organic compounds	Organic acids and derivatives	Organic phosphoric acids and derivatives	Phosphate esters	Phosphoethanolamines	This compound belongs to the class of organic compounds known as phosphoethanolamines. These are compounds containing a phosphate linked to the second carbon of an ethanolamine.	Aliphatic acyclic compounds	SMILES
3114	#VALUE!	Cyclohexanesulfonyl fluoride, decafluoro(1,1,2,2,2-pentafluoroethyl)-	Cyclohexanesulfonyl fluoride, decafluoro(pentafluoroethyl)- (9CI); Decafluoro(1,1,2,2,2-pentafluoroethyl)cyclohexanesulfonyl fluoride	C8 F16 O2 S	FC(F)(F)C(F)(F)C1(F)C(F)(F)C(F)(F)C(F)(C(F)(F)C1(F)F)S(F)(=O)=O		201	perfluoroalkane sulfonyl halides	1	8(1R)	0	1	0	0	NA	0		FC(F)(F)C(F)(F)C1(F)C(F)(F)C(F)(F)C(F)(C(F)(F)C1(F)F)S(F)(=O)=O	NA	NA	NA	NA	No splittable bond found for the input molecule FC(F)(F)C(F)(F)C1(F)C(F)(F)C(F)(F)C(F)(C(F)(F)C1(F)F)S(F)(=O)=O	6	#VALUE!	FC(F)(F)C(F)(F)C1(F)C(F)(F)C(F)(F)C(F)(C(F)(F)C1(F)F)S(F)(=O)=O	ZUNLKLHLASQCRH-UHFFFAOYSA-N	Organic compounds	Organohalogen compounds	Alkyl halides	Cyclohexyl halides	Cyclohexyl halides	This compound belongs to the class of organic compounds known as cyclohexyl halides. These are organohalogen compounds containing a monocyclic cyclohexane moiety that is substituted at one or more positions by an halogen atom.	Aliphatic homomonocyclic compounds	SMILES			#VALUE!	CCC1CCC(CC1)S(=O)=O	TYNYSXZSAWFRNW-UHFFFAOYSA-N	Organic compounds	Organosulfur compounds	Thiols	Alkylthiols	Alkylthiols	This compound belongs to the class of organic compounds known as alkylthiols. These are organic compounds containing the thiol functional group linked to an alkyl chain.	Aliphatic homomonocyclic compounds	SMILES
3116	68239-72-5	1-Pentanesulfonamide, 1,1,2,2,3,3,4,4,5,5,5-undecafluoro-N-(4-hydroxybutyl)-N-methyl-	1,1,2,2,3,3,4,4,5,5,5-Undecafluoro-N-(4-hydroxybutyl)-N-methyl-1-pentanesulfonamide	C10 H12 F11 N O3 S	CN(CCCCO)S(=O)(=O)C(F)(F)C(F)(F)C(F)(F)C(F)(F)C(F)(F)F		203.01	perfluoroalkane sulfonyl amides/amido ethanols (xFASA/Es) and other alcohols	1	5	1	1	0	0	NA	0		CN(CCCCO)S(=O)(=O)C(F)(F)C(F)(F)C(F)(F)C(F)(F)C(F)(F)F	CNCCCCO	S(=O)(=O)C(F)(F)C(F)(F)C(F)(F)C(F)(F)C(F)(F)F	1	S(=O)(=O)			68239-72-5	CN(CCCCO)S(=O)(=O)C(F)(F)C(F)(F)C(F)(F)C(F)(F)C(F)(F)F	YZMJHIOSEWYVSR-UHFFFAOYSA-N	Organic compounds	Organic acids and derivatives	Organic sulfonic acids and derivatives	Organosulfonic acids and derivatives	Organosulfonamides	This compound belongs to the class of organic compounds known as organosulfonamides. These are compounds containing the sulfonamide functional group, an amide of sulfonic acid with the general structure R1S(=O)2N(R2)R3 (R1=alkyl, aryl; R2,R3=H, alkyl, aryl).	Aliphatic acyclic compounds	SMILES			68239-72-5	CN(CCCCO)S(=O)(=O)CCCCC	YIMJCBBJVLHBQY-UHFFFAOYSA-N	Organic compounds	Organic acids and derivatives	Organic sulfonic acids and derivatives	Organosulfonic acids and derivatives	Organosulfonamides	This compound belongs to the class of organic compounds known as organosulfonamides. These are compounds containing the sulfonamide functional group, an amide of sulfonic acid with the general structure R1S(=O)2N(R2)R3 (R1=alkyl, aryl; R2,R3=H, alkyl, aryl).	Aliphatic acyclic compounds	SMILES
3117	68239-74-7	1-Hexanesulfonamide, 1,1,2,2,3,3,4,4,5,5,6,6,6-tridecafluoro-N-(4-hydroxybutyl)-N-methyl-	1,1,2,2,3,3,4,4,5,5,6,6,6-Tridecafluoro-N-(4-hydroxybutyl)-N-methyl-1-hexanesulfonamide	C11 H12 F13 N O3 S	CN(CCCCO)S(=O)(=O)C(F)(F)C(F)(F)C(F)(F)C(F)(F)C(F)(F)C(F)(F)F		203.01	perfluoroalkane sulfonyl amides/amido ethanols (xFASA/Es) and other alcohols	1	6	1	1	0	0	NA	0		CN(CCCCO)S(=O)(=O)C(F)(F)C(F)(F)C(F)(F)C(F)(F)C(F)(F)C(F)(F)F	CNCCCCO	S(=O)(=O)C(F)(F)C(F)(F)C(F)(F)C(F)(F)C(F)(F)C(F)(F)F	1	S(=O)(=O)			68239-74-7	CN(CCCCO)S(=O)(=O)C(F)(F)C(F)(F)C(F)(F)C(F)(F)C(F)(F)C(F)(F)F	UXBLTIRZNSMGNQ-UHFFFAOYSA-N	Organic compounds	Organic acids and derivatives	Organic sulfonic acids and derivatives	Organosulfonic acids and derivatives	Organosulfonamides	This compound belongs to the class of organic compounds known as organosulfonamides. These are compounds containing the sulfonamide functional group, an amide of sulfonic acid with the general structure R1S(=O)2N(R2)R3 (R1=alkyl, aryl; R2,R3=H, alkyl, aryl).	Aliphatic acyclic compounds	SMILES			68239-74-7	CN(CCCCO)S(=O)(=O)CCCCCC	PNYSFZPXSUBMRZ-UHFFFAOYSA-N	Organic compounds	Organic acids and derivatives	Organic sulfonic acids and derivatives	Organosulfonic acids and derivatives	Organosulfonamides	This compound belongs to the class of organic compounds known as organosulfonamides. These are compounds containing the sulfonamide functional group, an amide of sulfonic acid with the general structure R1S(=O)2N(R2)R3 (R1=alkyl, aryl; R2,R3=H, alkyl, aryl).	Aliphatic acyclic compounds	SMILES
3121	#VALUE!	1-Pentanesulfonamide, 1,1,2,2,3,3,4,4,5,5,5-undecafluoro-N-(phenylmethyl)-	1,1,2,2,3,3,4,4,5,5,5-Undecafluoro-N-(phenylmethyl)-1-pentanesulfonamide	C12 H8 F11 N O2 S	FC(F)(F)C(F)(F)C(F)(F)C(F)(F)C(F)(F)S(=O)(=O)NCC1=CC=CC=C1		203	perfluoroalkane sulfonyl-based nonpolymers	1	5	1	1	0	0	NA	0		FC(F)(F)C(F)(F)C(F)(F)C(F)(F)C(F)(F)S(=O)(=O)NCC1=CC=CC=C1	NCC1=CC=CC=C1	FC(F)(F)C(F)(F)C(F)(F)C(F)(F)C(F)(F)S(=O)=O	1	S(=O)(=O)			#VALUE!	FC(F)(F)C(F)(F)C(F)(F)C(F)(F)C(F)(F)S(=O)(=O)NCC1=CC=CC=C1	RMTNCHPOOXNCQZ-UHFFFAOYSA-N	Organic compounds	Benzenoids	Benzene and substituted derivatives		Benzene and substituted derivatives	This compound belongs to the class of organic compounds known as benzene and substituted derivatives. These are aromatic compounds containing one monocyclic ring system consisting of benzene.	Aromatic homomonocyclic compounds	SMILES			#VALUE!	CCCCCS(=O)(=O)NCC1=CC=CC=C1	URUGHLNIDCSHAW-UHFFFAOYSA-N	Organic compounds	Benzenoids	Benzene and substituted derivatives		Benzene and substituted derivatives	This compound belongs to the class of organic compounds known as benzene and substituted derivatives. These are aromatic compounds containing one monocyclic ring system consisting of benzene.	Aromatic homomonocyclic compounds	SMILES
3123	68298-89-5	1-Heptanesulfonamide, 1,1,2,2,3,3,4,4,5,5,6,6,7,7,7-pentadecafluoro-N-(4-hydroxybutyl)-N-methyl-	1,1,2,2,3,3,4,4,5,5,6,6,7,7,7-Pentadecafluoro-N-(4-hydroxybutyl)-N-methyl-1-heptanesulfonamide	C12 H12 F15 N O3 S	CN(CCCCO)S(=O)(=O)C(F)(F)C(F)(F)C(F)(F)C(F)(F)C(F)(F)C(F)(F)C(F)(F)F		203.01	perfluoroalkane sulfonyl amides/amido ethanols (xFASA/Es) and other alcohols	1	7	1	1	0	0	NA	0		CN(CCCCO)S(=O)(=O)C(F)(F)C(F)(F)C(F)(F)C(F)(F)C(F)(F)C(F)(F)C(F)(F)F	CNCCCCO	S(=O)(=O)C(F)(F)C(F)(F)C(F)(F)C(F)(F)C(F)(F)C(F)(F)C(F)(F)F	1	S(=O)(=O)			68298-89-5	CN(CCCCO)S(=O)(=O)C(F)(F)C(F)(F)C(F)(F)C(F)(F)C(F)(F)C(F)(F)C(F)(F)F	PNBLAQHWLKUKEU-UHFFFAOYSA-N	Organic compounds	Organic acids and derivatives	Organic sulfonic acids and derivatives	Organosulfonic acids and derivatives	Organosulfonamides	This compound belongs to the class of organic compounds known as organosulfonamides. These are compounds containing the sulfonamide functional group, an amide of sulfonic acid with the general structure R1S(=O)2N(R2)R3 (R1=alkyl, aryl; R2,R3=H, alkyl, aryl).	Aliphatic acyclic compounds	SMILES			68298-89-5	CN(CCCCO)S(=O)(=O)CCCCCCC	FXPWRDVSYCESEO-UHFFFAOYSA-N	Organic compounds	Organic acids and derivatives	Organic sulfonic acids and derivatives	Organosulfonic acids and derivatives	Organosulfonamides	This compound belongs to the class of organic compounds known as organosulfonamides. These are compounds containing the sulfonamide functional group, an amide of sulfonic acid with the general structure R1S(=O)2N(R2)R3 (R1=alkyl, aryl; R2,R3=H, alkyl, aryl).	Aliphatic acyclic compounds	SMILES
3128	#VALUE!	1-Heptanesulfonamide, N-butyl-1,1,2,2,3,3,4,4,5,5,6,6,7,7,7-pentadecafluoro-N-(2-hydroxyethyl)-	N-Butyl-1,1,2,2,3,3,4,4,5,5,6,6,7,7,7-pentadecafluoro-N-(2-hydroxyethyl)-1-heptanesulfonamide	C13 H14 F15 N O3 S	CCCCN(CCO)S(=O)(=O)C(F)(F)C(F)(F)C(F)(F)C(F)(F)C(F)(F)C(F)(F)C(F)(F)F		203.01	perfluoroalkane sulfonyl amides/amido ethanols (xFASA/Es) and other alcohols	1	7	1	1	0	0	NA	0		CCCCN(CCO)S(=O)(=O)C(F)(F)C(F)(F)C(F)(F)C(F)(F)C(F)(F)C(F)(F)C(F)(F)F	CCCCNCCO	S(=O)(=O)C(F)(F)C(F)(F)C(F)(F)C(F)(F)C(F)(F)C(F)(F)C(F)(F)F	1	S(=O)(=O)			#VALUE!	CCCCN(CCO)S(=O)(=O)C(F)(F)C(F)(F)C(F)(F)C(F)(F)C(F)(F)C(F)(F)C(F)(F)F	WIUXGCKDKOYUAL-UHFFFAOYSA-N	Organic compounds	Organic acids and derivatives	Organic sulfonic acids and derivatives	Organosulfonic acids and derivatives	Organosulfonamides	This compound belongs to the class of organic compounds known as organosulfonamides. These are compounds containing the sulfonamide functional group, an amide of sulfonic acid with the general structure R1S(=O)2N(R2)R3 (R1=alkyl, aryl; R2,R3=H, alkyl, aryl).	Aliphatic acyclic compounds	SMILES			#VALUE!	CCCCN(CCO)S(=O)(=O)CCCCCCC	UQTBBVUUEKWGFO-UHFFFAOYSA-N	Organic compounds	Organic acids and derivatives	Organic sulfonic acids and derivatives	Organosulfonic acids and derivatives	Organosulfonamides	This compound belongs to the class of organic compounds known as organosulfonamides. These are compounds containing the sulfonamide functional group, an amide of sulfonic acid with the general structure R1S(=O)2N(R2)R3 (R1=alkyl, aryl; R2,R3=H, alkyl, aryl).	Aliphatic acyclic compounds	SMILES
3131	68318-34-3	Cyclohexanesulfonyl fluoride, decafluoro(trifluoromethyl)-	Decafluoro(trifluoromethyl)cyclohexanesulfonyl fluoride	C7 F14 O2 S	FC(F)(F)C1(F)C(F)(F)C(F)(F)C(F)(F)C(F)(F)C1(F)S(F)(=O)=O		201	perfluoroalkane sulfonyl halides	1	7(1R)	1	1	0	0	NA	0		FC(F)(F)C1(F)C(F)(F)C(F)(F)C(F)(F)C(F)(F)C1(F)S(F)(=O)=O	NA	NA	NA	NA	No splittable bond found for the input molecule FC(F)(F)C1(F)C(F)(F)C(F)(F)C(F)(F)C(F)(F)C1(F)S(F)(=O)=O	6	68318-34-3	FC(F)(F)C1(F)C(F)(F)C(F)(F)C(F)(F)C(F)(F)C1(F)S(F)(=O)=O	SLYWOXPMQGKVAU-UHFFFAOYSA-N	Organic compounds	Organohalogen compounds	Alkyl halides	Cyclohexyl halides	Cyclohexyl halides	This compound belongs to the class of organic compounds known as cyclohexyl halides. These are organohalogen compounds containing a monocyclic cyclohexane moiety that is substituted at one or more positions by an halogen atom.	Aliphatic homomonocyclic compounds	SMILES			68318-34-3	CC1CCCCC1S(=O)=O	CKRZLWPKCNFSLU-UHFFFAOYSA-N	Organic compounds	Organosulfur compounds	Thiols	Alkylthiols	Alkylthiols	This compound belongs to the class of organic compounds known as alkylthiols. These are organic compounds containing the thiol functional group linked to an alkyl chain.	Aliphatic homomonocyclic compounds	SMILES
3136	68555-79-3	Glycine, N-ethyl-N-[(1,1,2,2,3,3,4,4,5,5,5-undecafluoropentyl)sulfonyl]-, ethyl ester	Glycine, N-ethyl-N-[(undecafluoropentyl)sulfonyl]-, ethyl ester (9CI)	C11 H12 F11 N O4 S	CCOC(=O)CN(CC)S(=O)(=O)C(F)(F)C(F)(F)C(F)(F)C(F)(F)C(F)(F)F		203.05	perfluoroalkane sulfonyl acetic acids & esters	1	5	1	1	0	0	NA	0		CCOC(=O)CN(CC)S(=O)(=O)C(F)(F)C(F)(F)C(F)(F)C(F)(F)C(F)(F)F	CCOC(=O)CNCC	S(=O)(=O)C(F)(F)C(F)(F)C(F)(F)C(F)(F)C(F)(F)F	1	S(=O)(=O)			68555-79-3	CCOC(=O)CN(CC)S(=O)(=O)C(F)(F)C(F)(F)C(F)(F)C(F)(F)C(F)(F)F	YEORWLLYWQFDEW-UHFFFAOYSA-N	Organic compounds	Organic acids and derivatives	Carboxylic acids and derivatives	Amino acids, peptides, and analogues	Alpha amino acid esters	This compound belongs to the class of organic compounds known as alpha amino acid esters. These are ester derivatives of alpha amino acids.	Aliphatic acyclic compounds	SMILES			68555-79-3	CCOC(=O)CN(CC)S(=O)(=O)CCCCC	FHXOETZHQOZZKB-UHFFFAOYSA-N	Organic compounds	Organic acids and derivatives	Carboxylic acids and derivatives	Amino acids, peptides, and analogues	Alpha amino acid esters	This compound belongs to the class of organic compounds known as alpha amino acid esters. These are ester derivatives of alpha amino acids.	Aliphatic acyclic compounds	SMILES
[truncated: 30 more rows]
[truncated: 40 more columns]

## Sheet: Fluorotelomer
							Category in the OECD list											Split result								Scenario i)													Scenario ii)
ID_in_OECD_list	CAS_Number	Chemical_Name	Synonyms	Molecular_Formula	SMILES	Previously_used_CAS_Number	Structure_Category	Structure_Category_Name	Number_of_Functional_Groups	Perfluoroalkyl_Chain_Length	Linear_or_Branched_Isomer	X.Potential._precursor_to_PFAAs_in_the_environment.biota	Polymer	Mixture	Related_Chemicals	Uncertainty_in_Structure_Categorisation	Note	SMILES_in	R_group	CnF2n+1-X	N_PFAS_Groups_Out	SplitSMARTS (X)	SplitPFAS_errorMsg	Error_code	CAS_Number_OriginalMolecule	SMILES	new_InChIKey	kingdom_name	superclass_name	class_name	subclass_name	direct_parent_name	description	molecular_framework	ClassyFireSource	MSG	query_id	CAS_Number_OriginalMolecule	no_F_SMILES	new_InChIKey	kingdom_name	superclass_name	class_name	subclass_name	direct_parent_name	description	molecular_framework	ClassyFireSource	MSG
6	374-98-1	Butane, 1,1,1,2,2,3,3-heptafluoro-4-iodo-	1,1,1,2,2,3,3-Heptafluoro-4-iodobutane; 2,2,3,3,4,4,4-Heptafluoro-1-iodobutane	C4 H2 F7 I	FC(F)(F)C(F)(F)C(F)(F)CI		404	n:1 fluorotelomer-based non-polymers	1	3	1	1	0	0		0		FC(F)(F)C(F)(F)C(F)(F)CI	I	FC(F)(F)C(F)(F)C(F)(F)C	1	[CH2]			374-98-1	FC(F)(F)C(F)(F)C(F)(F)CI	AFHPVXVEXINDFS-UHFFFAOYSA-N	Organic compounds	Organohalogen compounds	Organoiodides		Organoiodides	This compound belongs to the class of organic compounds known as organoiodides. These are compounds containing a chemical bond between a carbon atom and an iodine atom.	Aliphatic acyclic compounds	SMILES			374-98-1	CCCCI	KMGBZBJJOKUPIA-UHFFFAOYSA-N	Organic compounds	Organohalogen compounds	Organoiodides		Organoiodides	This compound belongs to the class of organic compounds known as organoiodides. These are compounds containing a chemical bond between a carbon atom and an iodine atom.	Aliphatic acyclic compounds	SMILES
[truncated: 493 more rows]
[truncated: 40 more columns]
